# Supplementary material for: Francisella novicida Two-Component System Response Regulator BfpR Modulates iglC Gene Expression, Antimicrobial Peptide Resistance, and Biofilm Production
Source: Front Cell Infect Microbiol. 2020 Mar 13;10:82. doi: 10.3389/fcimb.2020.00082 (PMC7082314; doi:10.3389/fcimb.2020.00082)
Supplement: Supplementary file 3 [file Table_5.xlsx]

## Sheet: Sorted by FTN #
genome?	origin	type	start	end	score	strand	frame	Symbols	Hit_count 798	Hit_count 801	logFC	logCPM	PValue		log2FC	FC	log10FC		ABC Transporters		Alanine, aspartate and glutamate metabolism		alpha-Linolenic acid metabolism		Amino sugar and nucleotide sugar metabolism		Aminoacyl-tRNA biosynthesis		Arachidonic acid metabolism		Arginine and proline metabolism		Arginine biosynthesis		Ascorbate and aldarate metabolism		Bacterial secretion system		Base excision repair		beta-Alanine metabolism		Biosynthesis of unsaturated fatty acids		Biotin metabolism		Butanoate metabolism		C5-Branched dibasic acid metabolism
gi|118496615|ref|NC_008601.1|	RefSeq	gene	145	1620	.	+	.	ID=gene0;Name=dnaA;Dbxref=GeneID:4547377;gbkey=Gene;gene=dnaA;locus_tag=FTN_0001	6532	2745	-0.633911	8.85713	0.00227422		-0.633911	0.644427	-0.190826		FTN324	-0.0876876	FTN19	-0.195194	FTN1439	-0.147042	FTN447	0.112064	FTN129	-0.00386956	FTN698	-0.095781	FTN410	-0.111995	FTN171	0.0370731	FTN963	0.0681964	FTN73	-0.134672	FTN569	0.134609	FTN963	0.0681964	FTN1460	-0.0888523	FTN568	0.0242905	FTN127	0.0603919	FTN59
gi|118496615|ref|NC_008601.1|	RefSeq	gene	1657	2760	.	+	.	ID=gene1;Name=dnaN;Dbxref=GeneID:4547378;gbkey=Gene;gene=dnaN;locus_tag=FTN_0002	11274	5814	-0.338602	9.41988	0.100132		-0.338602	0.790807	-0.101929		FTN325	-0.0234291	FTN20	-0.10671			FTN448	-0.0655512	FTN147	0.0536029			FTN963	0.0681964	FTN172	-0.274311			FTN121	-0.112373	FTN603	0.00755599	FTN1353	0.243683	FTN1564	0.191555	FTN811	-0.00617063	FTN1041	0.170473	FTN60
gi|118496615|ref|NC_008601.1|	RefSeq	gene	2791	4044	.	-	.	ID=gene2;Name=FTN_0003;Dbxref=GeneID:4547379;gbkey=Gene;locus_tag=FTN_0003	2757	1720	-0.0638976	7.72274	0.762373		-0.0638976	0.956676	-0.0192351		FTN326	-0.188813	FTN21	-0.0746682			FTN462	-0.0870597	FTN168	0.192771			FTN1131	0.0958409	FTN410	-0.111995			FTN259	0.0616818	FTN673	-0.138782	FTN1354	0.272193			FTN812	0.211363	FTN1042	0.163695	FTN61
gi|118496615|ref|NC_008601.1|	RefSeq	gene	4244	5767	.	+	.	ID=gene3;Name=FTN_0004;Dbxref=GeneID:4547380;gbkey=Gene;locus_tag=FTN_0004	1086	745	0.0730679	7.01826	0.743091		0.0730679	1.05195	0.0219956		FTN327	-0.088884	FTN127	0.0603919			FTN484	-0.130635	FTN214	0.120649			FTN1146	-0.0508579	FTN1146	-0.0508579			FTN672	-0.0187431	FTN838	-0.0237538	FTN1701	0.0103695			FTN813	-0.00372213	FTN1438	-0.129757	FTN593
gi|118496615|ref|NC_008601.1|	RefSeq	gene	5832	6803	.	+	.	ID=gene4;Name=corA;Dbxref=GeneID:4547381;gbkey=Gene;gene=corA;locus_tag=FTN_0005	907	376	-0.653442	6.2591	0.00356501		-0.653442	0.635762	-0.196706		FTN328	-0.136511	FTN171	0.0370731			FTN485	0.0425234	FTN221	0.128115			FTN1444	0.00994521	FTN1532	-0.0449685			FTN843	0.0380037	FTN1035	0.0316538					FTN814	0.183155	FTN1636	-0.167403	FTN594
gi|118496615|ref|NC_008601.1|	RefSeq	gene	6816	7283	.	-	.	ID=gene5;Name=FTN_0006;Dbxref=GeneID:4548498;gbkey=Gene;locus_tag=FTN_0006	5326	2316	-0.584607	8.24818	0.00497326		-0.584607	0.666831	-0.175984		FTN502	0.0118472	FTN172	-0.274311			FTN514	-0.330818	FTN224	0.0439273			FTN1467	-0.143138	FTN1725	0.0747552			FTN1094	-0.153866	FTN1350	0.0973718					FTN815	-0.0548909	FTN1637	-0.0273401	FTN1041
gi|118496615|ref|NC_008601.1|	RefSeq	gene	7361	7678	.	-	.	ID=gene6;Name=FTN_0007;Dbxref=GeneID:4548499;gbkey=Gene;locus_tag=FTN_0007	23047	14309	-0.0708661	10.435	0.729715		-0.0708661	0.952066	-0.0213328		FTN503	0.0893137	FTN178	0.126985			FTN515	-0.0279371	FTN288	0.0121988			FTN1725	0.0747552					FTN1095	-0.260535	FTN1486	-0.0358679					FTN816	0.110324	FTN1638	-0.284695	FTN1042
gi|118496615|ref|NC_008601.1|	RefSeq	gene	7768	8640	.	-	.	ID=gene7;Name=FTN_0008;Dbxref=GeneID:4548500;gbkey=Gene;locus_tag=FTN_0008	678	387	-0.192116	5.96635	0.399219		-0.192116	0.875321	-0.0578328		FTN572	-0.0739346	FTN343	-0.142446			FTN627	0.0384937	FTN310	0.0386165			FTN1731	-0.0671133					FTN1096	-0.369225	FTN1604	-0.0574873					FTN818	-0.0545671	FTN1639	-0.420982
gi|118496615|ref|NC_008601.1|	RefSeq	gene	8784	8966	.	+	.	ID=gene8;Name=FTN_0009;Dbxref=GeneID:4548501;gbkey=Gene;locus_tag=FTN_0009	108	90	0.353316	4.28071	0.246343		0.353316	1.27749	0.106359		FTN641	0.00713886	FTN410	-0.111995			FTN646	-0.0125066	FTN366	0.0472668									FTN1510	0.0864238							FTN1228	-0.036176	FTN1701	0.0103695
gi|118496615|ref|NC_008601.1|	RefSeq	gene	9372	9806	.	-	.	ID=gene9;Name=FTN_0010;Dbxref=GeneID:4548502;gbkey=Gene;locus_tag=FTN_0010	230	201	0.42211	5.08075	0.0931911		0.42211	1.33989	0.127068		FTN642	-0.0305451	FTN485	0.0425234			FTN663	-0.0127026	FTN441	0.0792194									FTN1574	-0.0561529							FTN1339	-0.207988
gi|118496615|ref|NC_008601.1|	RefSeq	gene	10041	10220	.	-	.	ID=gene10;Name=FTN_0011;Dbxref=GeneID:4548503;gbkey=Gene;locus_tag=FTN_0011	60	53	0.436869	4.42417	0.228556		0.436869	1.35366	0.131511		FTN658	-0.0919103	FTN555	-0.0425287			FTN685	-0.0619751	FTN468	-0.235297									FTN1595	-0.0905475							FTN1341	-0.0902503
gi|118496615|ref|NC_008601.1|	RefSeq	gene	10217	10438	.	-	.	ID=gene11;Name=FTN_0012;Dbxref=GeneID:4548504;gbkey=Gene;locus_tag=FTN_0012	164	109	0.0273968	4.89927	0.936246		0.0273968	1.01917	0.00824727		FTN659	-0.177717	FTN588	-0.1281			FTN686	-0.0175407	FTN469	0.183416									FTN1630	-0.0508216							FTN1479	-0.0164209
gi|118496615|ref|NC_008601.1|	RefSeq	gene	10936	11835	.	-	.	ID=gene12;Name=FTN_0013;Dbxref=GeneID:4548505;gbkey=Gene;locus_tag=FTN_0013	589	548	0.512587	6.79179	0.0212589		0.512587	1.42661	0.154304		FTN737	-0.181488	FTN694	0.100353			FTN729	0.168673	FTN470	0.109921									FTN1703	0.0154535
gi|118496615|ref|NC_008601.1|	RefSeq	gene	11832	12728	.	-	.	ID=gene13;Name=FTN_0014;Dbxref=GeneID:4548506;gbkey=Gene;locus_tag=FTN_0014	501	334	0.0318176	6.41967	0.889209		0.0318176	1.0223	0.00957804		FTN738	-0.0521095	FTN935	-0.067779			FTN806	-0.130485	FTN473	-0.0676638
gi|118496615|ref|NC_008601.1|	RefSeq	gene	12732	12911	.	-	.	ID=gene14;Name=FTN_0015;Dbxref=GeneID:4548507;gbkey=Gene;locus_tag=FTN_0015	136	110	0.310376	4.59279	0.265293		0.310376	1.24003	0.0934324		FTN739	-0.117901	FTN1080	-0.218603			FTN810	0.032113	FTN474	0.021625
gi|118496615|ref|NC_008601.1|	RefSeq	gene	13107	13781	.	-	.	ID=gene15;Name=FTN_0016;Dbxref=GeneID:4548508;gbkey=Gene;locus_tag=FTN_0016	605	301	-0.39027	6.29028	0.0890717		-0.39027	0.762987	-0.117483		FTN902	-0.375422	FTN1088	0.073864			FTN1080	-0.218603	FTN519	0.0877733
gi|118496615|ref|NC_008601.1|	RefSeq	gene	13786	15027	.	-	.	ID=gene16;Name=FTN_0017;Dbxref=GeneID:4548509;gbkey=Gene;locus_tag=FTN_0017	844	671	0.285813	7.35059	0.192618		0.285813	1.2191	0.0860382		FTN1106	-0.045007	FTN1131	0.0958409			FTN1149	0.0703834	FTN539	0.0235723
gi|118496615|ref|NC_008601.1|	RefSeq	gene	15685	16908	.	-	.	ID=gene17;Name=sdaC;Dbxref=GeneID:4548510;gbkey=Gene;gene=sdaC;locus_tag=FTN_0018	613	577	0.529364	6.10837	0.0173263		0.529364	1.44329	0.159355		FTN1107	-0.0553021	FTN1146	-0.0508579			FTN1219	-0.0524507	FTN557	-0.232183
gi|118496615|ref|NC_008601.1|	RefSeq	gene	17049	17975	.	-	.	ID=gene18;Name=pyrB;Dbxref=GeneID:4548511;gbkey=Gene;gene=pyrB;locus_tag=FTN_0019	1137	473	-0.648422	6.21463	0.00322975		-0.648422	0.637978	-0.195194		FTN1266	-0.180851	FTN1208	0.254588			FTN1417	-0.0352853	FTN614	0.0227252
gi|118496615|ref|NC_008601.1|	RefSeq	gene	18117	21401	.	-	.	ID=gene19;Name=carB;Dbxref=GeneID:4548512;gbkey=Gene;gene=carB;locus_tag=FTN_0020	9897	5048	-0.354484	9.29315	0.0855279		-0.354484	0.78215	-0.10671		FTN1267	-0.0782545	FTN1383	-0.029739			FTN1418	0.0364121	FTN647	-0.175794
gi|118496615|ref|NC_008601.1|	RefSeq	gene	21406	22572	.	-	.	ID=gene20;Name=carA;Dbxref=GeneID:4548513;gbkey=Gene;gene=carA;locus_tag=FTN_0021	4928	2706	-0.248043	8.30133	0.232224		-0.248043	0.842038	-0.0746682		FTN1268	-0.138965	FTN1421	-0.0984539			FTN1425	0.168217	FTN650	-0.227137
gi|118496615|ref|NC_008601.1|	RefSeq	gene	22992	24047	.	+	.	ID=gene21;Name=FTN_0022;Dbxref=GeneID:4548514;gbkey=Gene;locus_tag=FTN_0022	1279	739	-0.174558	7.01869	0.420803		-0.174558	0.886039	-0.0525473		FTN1589	-0.0784157	FTN1532	-0.0449685			FTN1426	0.0708023	FTN726	0.296372
gi|118496615|ref|NC_008601.1|	RefSeq	gene	24068	24748	.	-	.	ID=gene22;Name=tmpT;Dbxref=GeneID:4548515;gbkey=Gene;gene=tmpT;locus_tag=FTN_0023	677	344	-0.359866	5.88766	0.112151		-0.359866	0.779237	-0.108331		FTN1590	-0.138907	FTN1694	-0.0692593			FTN1504	-0.149857	FTN736	0.090538
gi|118496615|ref|NC_008601.1|	RefSeq	gene	24880	26226	.	+	.	ID=gene23;Name=pyrC;Dbxref=GeneID:4548516;gbkey=Gene;gene=pyrC;locus_tag=FTN_0024	2864	1901	0.0255153	7.85456	0.904962		0.0255153	1.01784	0.00768086		FTN1591	-0.0541515	FTN1700	-0.0766333			FTN1632	-0.220701	FTN778	-0.142966
gi|118496615|ref|NC_008601.1|	RefSeq	gene	26210	26797	.	-	.	ID=gene24;Name=FTN_0025;Dbxref=GeneID:4548517;gbkey=Gene;locus_tag=FTN_0025	934	534	-0.18976	6.14305	0.390201		-0.18976	0.876751	-0.0571236		FTN1592	-0.170564	FTN1701	0.0103695			FTN1744	0.0535283	FTN796	0.305803
gi|118496615|ref|NC_008601.1|	RefSeq	gene	27076	27330	.	+	.	ID=gene25;Name=FTN_0026;Dbxref=GeneID:4547493;gbkey=Gene;locus_tag=FTN_0026	159	89	-0.220134	3.71832	0.45969		-0.220134	0.858486	-0.0662668		FTN1593	-0.189087	FTN1725	0.0747552					FTN803	-0.0616014
gi|118496615|ref|NC_008601.1|	RefSeq	gene	28044	28595	.	+	.	ID=gene26;Name=FTN_0027;Dbxref=GeneID:4547494;gbkey=Gene;locus_tag=FTN_0027	322	165	-0.34762	4.94336	0.16213		-0.34762	0.785879	-0.104644		FTN1606	-0.145134							FTN870	-0.13625
gi|118496615|ref|NC_008601.1|	RefSeq	gene	28711	29763	.	-	.	ID=gene27;Name=FTN_0028;Dbxref=GeneID:4547495;gbkey=Gene;locus_tag=FTN_0028	286	240	0.363639	5.21475	0.136253		0.363639	1.28667	0.109466		FTN1708	0.0279049							FTN882	-0.202652
gi|118496615|ref|NC_008601.1|	RefSeq	gene	29750	30715	.	-	.	ID=gene28;Name=FTN_0029;Dbxref=GeneID:4547496;gbkey=Gene;locus_tag=FTN_0029	328	248	0.213342	4.94547	0.381598		0.213342	1.15937	0.0642225										FTN883	-0.220047
gi|118496615|ref|NC_008601.1|	RefSeq	gene	30802	31209	.	-	.	ID=gene29;Name=FTN_0030;Dbxref=GeneID:4547497;gbkey=Gene;locus_tag=FTN_0030	275	126	-0.508883	4.40414	0.0493556		-0.508883	0.702767	-0.153189										FTN992	-0.0807668
gi|118496615|ref|NC_008601.1|	RefSeq	gene	31335	32204	.	+	.	ID=gene30;Name=FTN_0031;Dbxref=GeneID:4547498;gbkey=Gene;locus_tag=FTN_0031	5605	2808	-0.38037	8.36083	0.0667109		-0.38037	0.76824	-0.114503										FTN1191	-0.0987854
gi|118496615|ref|NC_008601.1|	RefSeq	gene	32205	32831	.	-	.	ID=gene31;Name=FTN_0032;Dbxref=GeneID:4547499;gbkey=Gene;locus_tag=FTN_0032	23868	13097	-0.24905	10.414	0.224586		-0.24905	0.84145	-0.0749715										FTN1203	-0.0868388
gi|118496615|ref|NC_008601.1|	RefSeq	gene	32974	33522	.	+	.	ID=gene32;Name=FTN_0033;Dbxref=GeneID:4547500;gbkey=Gene;locus_tag=FTN_0033	1136	294	-1.33299	5.97556	4.23259e-09		-1.33299	0.396944	-0.401271										FTN1204	-0.0737042
gi|118496615|ref|NC_008601.1|	RefSeq	gene	33577	36951	.	-	.	ID=gene33;Name=FTN_0034;Dbxref=GeneID:4547501;gbkey=Gene;locus_tag=FTN_0034	10290	4503	-0.575485	9.25344	0.0053428		-0.575485	0.671061	-0.173238										FTN1205	-0.0561749
gi|118496615|ref|NC_008601.1|	RefSeq	gene	37218	37862	.	+	.	ID=gene34;Name=pyrF;Dbxref=GeneID:4547502;gbkey=Gene;gene=pyrF;locus_tag=FTN_0035	915	643	0.107819	6.38405	0.627803		0.107819	1.0776	0.0324569										FTN1206	-0.109732
gi|118496615|ref|NC_008601.1|	RefSeq	gene	37864	38604	.	+	.	ID=gene35;Name=pyrD;Dbxref=GeneID:4547503;gbkey=Gene;gene=pyrD;locus_tag=FTN_0036	728	533	0.166954	6.30563	0.45468		0.166954	1.12269	0.0502581										FTN1207	-0.151321
gi|118496615|ref|NC_008601.1|	RefSeq	gene	40003	40347	.	-	.	ID=gene36;Name=FTN_0037;Dbxref=GeneID:4547504;gbkey=Gene;locus_tag=FTN_0037	231	137	-0.136833	4.18079	0.612208		-0.136833	0.909513	-0.0411909										FTN1306	0.0925109
gi|118496615|ref|NC_008601.1|	RefSeq	gene	40366	40650	.	-	.	ID=gene37;Name=FTN_0038;Dbxref=GeneID:4547505;gbkey=Gene;locus_tag=FTN_0038	413	250	-0.107383	4.86071	0.659403		-0.107383	0.92827	-0.0323256										FTN1307	-0.0280527
gi|118496615|ref|NC_008601.1|	RefSeq	gene	40653	41078	.	-	.	ID=gene38;Name=FTN_0039;Dbxref=GeneID:4547506;gbkey=Gene;locus_tag=FTN_0039	525	341	-0.00575446	5.32919	0.988021		-0.00575446	0.996019	-0.00173227										FTN1364	0.00245109
gi|118496615|ref|NC_008601.1|	RefSeq	gene	41093	44347	.	-	.	ID=gene39;Name=FTN_0040;Dbxref=GeneID:4547507;gbkey=Gene;locus_tag=FTN_0040	2408	1518	-0.0488709	7.46561	0.818619		-0.0488709	0.966693	-0.0147116										FTN1365	0.120944
gi|118496615|ref|NC_008601.1|	RefSeq	gene	44366	46582	.	-	.	ID=gene40;Name=FTN_0041;Dbxref=GeneID:4547508;gbkey=Gene;locus_tag=FTN_0041	2013	1479	0.172052	7.30092	0.415365		0.172052	1.12666	0.0517929										FTN1366	0.044783
gi|118496615|ref|NC_008601.1|	RefSeq	gene	46882	47439	.	+	.	ID=gene41;Name=FTN_0042;Dbxref=GeneID:4547509;gbkey=Gene;locus_tag=FTN_0042	9793	6132	-0.0586027	9.2705	0.776379		-0.0586027	0.960194	-0.0176412										FTN1375	-0.139265
gi|118496615|ref|NC_008601.1|	RefSeq	gene	47436	48968	.	+	.	ID=gene42;Name=FTN_0043;Dbxref=GeneID:4547510;gbkey=Gene;locus_tag=FTN_0043	16640	9949	-0.125241	10.0967	0.541878		-0.125241	0.916851	-0.0377014										FTN1377	0.140177
gi|118496615|ref|NC_008601.1|	RefSeq	gene	49002	49649	.	+	.	ID=gene43;Name=FTN_0044;Dbxref=GeneID:4548536;gbkey=Gene;locus_tag=FTN_0044	11352	5712	-0.374083	9.39102	0.069359		-0.374083	0.771596	-0.11261										FTN1411	0.253303
gi|118496615|ref|NC_008601.1|	RefSeq	gene	49665	50744	.	+	.	ID=gene44;Name=FTN_0045;Dbxref=GeneID:4548537;gbkey=Gene;locus_tag=FTN_0045	10781	4387	-0.680383	9.12435	0.00100333		-0.680383	0.624	-0.204816										FTN1473	0.164155
gi|118496615|ref|NC_008601.1|	RefSeq	gene	50758	53736	.	+	.	ID=gene45;Name=FTN_0046;Dbxref=GeneID:4548538;gbkey=Gene;locus_tag=FTN_0046	17383	7862	-0.527914	9.87837	0.0103152		-0.527914	0.693557	-0.158918										FTN1497	0.311213
gi|118496615|ref|NC_008601.1|	RefSeq	gene	53754	57530	.	+	.	ID=gene46;Name=FTN_0047;Dbxref=GeneID:4548539;gbkey=Gene;locus_tag=FTN_0047	9656	3966	-0.666938	9.01688	0.00127142		-0.666938	0.629842	-0.200768										FTN1498	0.122967
gi|118496615|ref|NC_008601.1|	RefSeq	gene	57540	58760	.	+	.	ID=gene47;Name=FTN_0048;Dbxref=GeneID:4548540;gbkey=Gene;locus_tag=FTN_0048	2177	628	-1.17659	6.82121	5.68177e-08		-1.17659	0.442396	-0.354189										FTN1499	-0.182971
gi|118496615|ref|NC_008601.1|	RefSeq	gene	58770	59594	.	+	.	ID=gene48;Name=FTN_0049;Dbxref=GeneID:4548541;gbkey=Gene;locus_tag=FTN_0049	1614	512	-1.03949	6.42889	1.9749e-06		-1.03949	0.486499	-0.312918										FTN1541	0.0181542
gi|118496615|ref|NC_008601.1|	RefSeq	gene	59569	61092	.	+	.	ID=gene49;Name=FTN_0050;Dbxref=GeneID:4548542;gbkey=Gene;locus_tag=FTN_0050	3952	1350	-0.932784	7.70949	9.56455e-06		-0.932784	0.523847	-0.280796										FTN1575	0.342931
gi|118496615|ref|NC_008601.1|	RefSeq	gene	61102	61710	.	+	.	ID=gene50;Name=FTN_0051;Dbxref=GeneID:4548543;gbkey=Gene;locus_tag=FTN_0051	2693	1314	-0.418432	7.39398	0.0469509		-0.418432	0.748237	-0.125961										FTN1577	0.114783
gi|118496615|ref|NC_008601.1|	RefSeq	gene	61717	63780	.	+	.	ID=gene51;Name=FTN_0052;Dbxref=GeneID:4548544;gbkey=Gene;locus_tag=FTN_0052	3727	1073	-1.1795	7.75759	2.7906e-08		-1.1795	0.441504	-0.355065										FTN1578	0.330812
gi|118496615|ref|NC_008601.1|	RefSeq	gene	63789	64394	.	+	.	ID=gene52;Name=FTN_0053;Dbxref=GeneID:4548545;gbkey=Gene;locus_tag=FTN_0053	5222	2863	-0.250277	8.33684	0.227644		-0.250277	0.840735	-0.075341										FTN1579	0.295743
gi|118496615|ref|NC_008601.1|	RefSeq	gene	64387	64767	.	+	.	ID=gene53;Name=FTN_0054;Dbxref=GeneID:4548546;gbkey=Gene;locus_tag=FTN_0054	2026	1470	0.153961	7.43554	0.466332		0.153961	1.11262	0.0463468										FTN1629	0.0464687
gi|118496615|ref|NC_008601.1|	RefSeq	gene	64847	65683	.	-	.	ID=gene54;Name=tyrA;Dbxref=GeneID:4548547;gbkey=Gene;gene=tyrA;locus_tag=FTN_0055	606	522	0.401434	6.63079	0.0718167		0.401434	1.32082	0.120844										FTN1658	0.204433
gi|118496615|ref|NC_008601.1|	RefSeq	gene	65951	66388	.	-	.	ID=gene55;Name=dtd;Dbxref=GeneID:4548548;gbkey=Gene;gene=dtd;locus_tag=FTN_0056	642	383	-0.128408	5.59882	0.577041		-0.128408	0.914841	-0.0386546										FTN1663	-0.00950683
gi|118496615|ref|NC_008601.1|	RefSeq	gene	66662	67894	.	-	.	ID=gene56;Name=FTN_0057;Dbxref=GeneID:4548549;gbkey=Gene;locus_tag=FTN_0057	711	424	-0.128967	6.48497	0.570919		-0.128967	0.914486	-0.0388229										FTN1689	-0.063319
gi|118496615|ref|NC_008601.1|	RefSeq	gene	67913	69628	.	-	.	ID=gene57;Name=FTN_0058;Dbxref=GeneID:4548550;gbkey=Gene;locus_tag=FTN_0058	4158	1756	-0.626779	8.10961	0.00273046		-0.626779	0.647621	-0.188679										FTN1690	-0.0826756
gi|118496615|ref|NC_008601.1|	RefSeq	gene	69704	70783	.	-	.	ID=gene58;Name=leuB;Dbxref=GeneID:4548551;gbkey=Gene;gene=leuB;locus_tag=FTN_0059	2057	974	-0.461719	7.68095	0.0298584		-0.461719	0.726121	-0.138991										FTN1691	-0.11637
gi|118496615|ref|NC_008601.1|	RefSeq	gene	70785	71354	.	-	.	ID=gene59;Name=leuD;Dbxref=GeneID:4548552;gbkey=Gene;gene=leuD;locus_tag=FTN_0060	1587	806	-0.360622	7.3627	0.0927383		-0.360622	0.778829	-0.108558										FTN1722	-0.256903
gi|118496615|ref|NC_008601.1|	RefSeq	gene	71357	72766	.	-	.	ID=gene60;Name=leuC;Dbxref=GeneID:4548553;gbkey=Gene;gene=leuC;locus_tag=FTN_0061	4581	2353	-0.344359	8.66414	0.0978184		-0.344359	0.787658	-0.103662										FTN1723	-0.454706
gi|118496615|ref|NC_008601.1|	RefSeq	gene	72768	74348	.	-	.	ID=gene61;Name=leuA;Dbxref=GeneID:4548554;gbkey=Gene;gene=leuA;locus_tag=FTN_0062	13142	7114	-0.268659	9.90226	0.1914		-0.268659	0.830091	-0.0808744										FTN1780	-0.0519113
gi|118496615|ref|NC_008601.1|	RefSeq	gene	74359	75246	.	-	.	ID=gene62;Name=ilvE;Dbxref=GeneID:4548555;gbkey=Gene;gene=ilvE;locus_tag=FTN_0063	4787	2415	-0.370296	8.7493	0.0749034		-0.370296	0.773624	-0.11147										FTN1781	-0.150441
gi|118496615|ref|NC_008601.1|	RefSeq	gene	75645	78278	.	-	.	ID=gene63;Name=ppdK;Dbxref=GeneID:4547644;gbkey=Gene;gene=ppdK;locus_tag=FTN_0064	8272	4845	-0.154947	10.0307	0.452616		-0.154947	0.898165	-0.0466437
gi|118496615|ref|NC_008601.1|	RefSeq	gene	78555	78869	.	-	.	ID=gene64;Name=FTN_0065;Dbxref=GeneID:4547645;gbkey=Gene;locus_tag=FTN_0065	403	122	-1.10648	4.88644	1.25116e-05		-1.10648	0.464424	-0.333085
gi|118496615|ref|NC_008601.1|	RefSeq	gene	79068	81317	.	-	.	ID=gene65;Name=feoB;Dbxref=GeneID:4547646;gbkey=Gene;gene=feoB;locus_tag=FTN_0066	1182	884	0.197654	7.99068	0.359514		0.197654	1.14683	0.0594998
gi|118496615|ref|NC_008601.1|	RefSeq	gene	81418	82032	.	-	.	ID=gene66;Name=FTN_0067;Dbxref=GeneID:4547647;gbkey=Gene;locus_tag=FTN_0067	948	419	-0.561038	6.64258	0.0117459		-0.561038	0.677814	-0.168889
gi|118496615|ref|NC_008601.1|	RefSeq	gene	82047	82583	.	-	.	ID=gene67;Name=orn;Dbxref=GeneID:4547648;gbkey=Gene;gene=orn;locus_tag=FTN_0068	1875	933	-0.390116	7.28105	0.0671339		-0.390116	0.763068	-0.117437
gi|118496615|ref|NC_008601.1|	RefSeq	gene	82586	83155	.	-	.	ID=gene68;Name=efp;Dbxref=GeneID:4547649;gbkey=Gene;gene=efp;locus_tag=FTN_0069	4368	1999	-0.510884	8.26405	0.0143163		-0.510884	0.701792	-0.153791
gi|118496615|ref|NC_008601.1|	RefSeq	gene	83196	83603	.	-	.	ID=gene69;Name=pilE;Dbxref=GeneID:4547650;gbkey=Gene;gene=pilE;locus_tag=FTN_0070	2375	896	-0.7895	7.47113	0.000209711		-0.7895	0.578544	-0.237663
gi|118496615|ref|NC_008601.1|	RefSeq	gene	83616	84539	.	-	.	ID=gene70;Name=FTN_0071;Dbxref=GeneID:4547651;gbkey=Gene;locus_tag=FTN_0071	3407	1270	-0.806836	8.42697	0.000129731		-0.806836	0.571634	-0.242882
gi|118496615|ref|NC_008601.1|	RefSeq	gene	84600	85499	.	-	.	ID=gene71;Name=FTN_0072;Dbxref=GeneID:4547652;gbkey=Gene;locus_tag=FTN_0072	1919	954	-0.391469	7.78619	0.0659525		-0.391469	0.762353	-0.117844
gi|118496615|ref|NC_008601.1|	RefSeq	gene	85506	87161	.	-	.	ID=gene72;Name=FTN_0073;Dbxref=GeneID:4547653;gbkey=Gene;locus_tag=FTN_0073	6229	2979	-0.44737	10.5498	0.0309253		-0.44737	0.733378	-0.134672
gi|118496615|ref|NC_008601.1|	RefSeq	gene	87170	87418	.	-	.	ID=gene73;Name=FTN_0074;Dbxref=GeneID:4547654;gbkey=Gene;locus_tag=FTN_0074	1072	596	-0.230096	8.94517	0.295081		-0.230096	0.852578	-0.0692658
gi|118496615|ref|NC_008601.1|	RefSeq	gene	87394	87747	.	-	.	ID=gene74;Name=rnpA;Dbxref=GeneID:4547655;gbkey=Gene;gene=rnpA;locus_tag=FTN_0075	2504	1446	-0.175366	9.6648	0.405374		-0.175366	0.885543	-0.0527905
gi|118496615|ref|NC_008601.1|	RefSeq	gene	87737	87871	.	-	.	ID=gene75;Name=rpmH;Dbxref=GeneID:4547656;gbkey=Gene;gene=rpmH;locus_tag=FTN_0076	1482	906	-0.0931631	8.31362	0.666495		-0.0931631	0.937465	-0.0280449
gi|118496615|ref|NC_008601.1|	RefSeq	gene	87963	88421	.	-	.	ID=gene76;Name=FTN_0077;Dbxref=GeneID:4547657;gbkey=Gene;locus_tag=FTN_0077	2649	928	-0.896391	7.17943	2.52208e-05		-0.896391	0.537229	-0.26984
gi|118496615|ref|NC_008601.1|	RefSeq	gene	88548	89321	.	+	.	ID=gene77;Name=aroE;Dbxref=GeneID:4547658;gbkey=Gene;gene=aroE;locus_tag=FTN_0078	2988	2295	0.236093	7.87853	0.258076		0.236093	1.1778	0.0710709		-0.0876876	-0.195194	-0.147042	0.112064	-0.00386956	-0.095781	-0.111995	0.0370731	0.0681964	-0.134672	0.134609	0.0681964	-0.0888523	0.0242905	0.0603919	-0.138991	0.0838684	-0.0425287	-0.11147	-0.112379	0.0140892	-0.101929	-0.249172	0.0857326	0.136807	-0.374263	-0.0655303	-0.142372	-0.188679	-0.19757	0.0398472
gi|118496615|ref|NC_008601.1|	RefSeq	gene	89393	90748	.	+	.	ID=gene78;Name=murC;Dbxref=GeneID:4547659;gbkey=Gene;gene=murC;locus_tag=FTN_0079	6612	4454	0.0468033	8.97644	0.821405		0.0468033	1.03297	0.0140892		-0.0234291	-0.10671		-0.0655512	0.0536029		0.0681964	-0.274311		-0.112373	0.00755599	0.243683	0.191555	-0.00617063	0.170473	-0.108558	-0.00857352	-0.1281	-0.0299672	-0.221351	0.0370731	-0.157464		-0.128993	0.0681964	-0.239767	0.145799	-0.0125066	-0.0870597	-0.17292	0.0681964
gi|118496615|ref|NC_008601.1|	RefSeq	gene	90741	91613	.	+	.	ID=gene79;Name=FTN_0080;Dbxref=GeneID:4547660;gbkey=Gene;locus_tag=FTN_0080	5314	4211	0.281147	8.58482	0.174013		0.281147	1.21516	0.0846337		-0.188813	-0.0746682		-0.0870597	0.192771		0.0958409	-0.111995		0.0616818	-0.138782	0.272193		0.211363	0.163695	-0.103662	-0.0580442	0.073864	-0.19757	-0.095874	-0.0783927	-0.0667959		0.0136382	-0.0691603	-0.228047	0.108394	-0.0227751	-0.330818	-0.095781	-0.0774823
gi|118496615|ref|NC_008601.1|	RefSeq	gene	91624	92358	.	-	.	ID=gene80;Name=FTN_0081;Dbxref=GeneID:4547661;gbkey=Gene;locus_tag=FTN_0081	811	373	-0.503624	5.87218	0.0255662		-0.503624	0.705333	-0.151606		-0.088884	0.0603919		-0.130635	0.120649		-0.0508579	-0.0508579		-0.0187431	-0.0237538	0.0103695		-0.00372213	-0.129757	0.163124	0.163124	-0.212815	-0.142446		-0.0873738	-0.169643		-0.036176	-0.0304717	-0.128273	-0.0199623	-0.0352853	-0.0619751	-0.380937	-0.0364526
gi|118496615|ref|NC_008601.1|	RefSeq	gene	92435	92998	.	+	.	ID=gene81;Name=FTN_0082;Dbxref=GeneID:4547662;gbkey=Gene;locus_tag=FTN_0082	308	149	-0.430582	5.13347	0.0898647		-0.430582	0.741962	-0.129618		-0.136511	0.0370731		0.0425234	0.128115		0.00994521	-0.0449685		0.0380037	0.0316538			0.183155	-0.167403	0.130183	0.130183	0.254588	-0.111995			-0.286125		-0.0691603	-0.0877511	-0.212939	0.0695293	0.0364121	-0.0175407	-0.124918	0.0498824
gi|118496615|ref|NC_008601.1|	RefSeq	gene	93070	93828	.	+	.	ID=gene82;Name=FTN_0083;Dbxref=GeneID:4548930;gbkey=Gene;locus_tag=FTN_0083	808	549	0.0592295	6.20621	0.789479		0.0592295	1.04191	0.0178299		0.0118472	-0.274311		-0.330818	0.0439273		-0.143138	0.0747552		-0.153866	0.0973718			-0.0548909	-0.0273401	0.170473	-0.00020261	0.0447002	-0.197232			0.0646535		-0.325852	-0.129757	-0.327649	0.0957907	-0.220006	0.168673	0.0322696	0.0673734
gi|118496615|ref|NC_008601.1|	RefSeq	gene	93832	96573	.	+	.	ID=gene83;Name=FTN_0084;Dbxref=GeneID:4548931;gbkey=Gene;locus_tag=FTN_0084	1978	1211	-0.0910468	7.42295	0.669408		-0.0910468	0.938841	-0.0274078		0.0893137	0.126985		-0.0279371	0.0121988		0.0747552			-0.260535	-0.0358679			0.110324	-0.284695	0.163695	0.0376778	0	-0.175222			-0.0790991		-0.0852324	-0.147042	-0.420689	-0.0345123		0.032113	-0.212815	0.0428018
gi|118496615|ref|NC_008601.1|	RefSeq	gene	96649	97485	.	+	.	ID=gene84;Name=uspA;Dbxref=GeneID:4548932;gbkey=Gene;gene=uspA;locus_tag=FTN_0085	7385	3204	-0.587919	8.8923	0.00456123		-0.587919	0.665302	-0.176981		-0.0739346	-0.142446		0.0384937	0.0386165		-0.0671133			-0.369225	-0.0574873			-0.0545671	-0.420982		0.0880958	0	-0.18237			-0.217645		-0.207988		-0.48681			0.00926858	0.0376778
gi|118496615|ref|NC_008601.1|	RefSeq	gene	97601	98830	.	+	.	ID=gene85;Name=FTN_0086;Dbxref=GeneID:4548933;gbkey=Gene;locus_tag=FTN_0086	2429	1033	-0.616685	7.70865	0.00362551		-0.616685	0.652168	-0.185641		0.00713886	-0.111995		-0.0125066	0.0472668					0.0864238				-0.036176	0.0103695		0.114331	0	0.0645725			0.0308239		-0.1814		-0.458167			-0.0524507	-0.120215
gi|118496615|ref|NC_008601.1|	RefSeq	gene	98862	99479	.	+	.	ID=gene86;Name=FTN_0087;Dbxref=GeneID:4548934;gbkey=Gene;locus_tag=FTN_0087	8848	3456	-0.739442	8.86971	0.000362965		-0.739442	0.598971	-0.222594		-0.0305451	0.0425234		-0.0127026	0.0792194					-0.0561529				-0.207988			0.0507032	0	-0.124918			-0.188121		-0.0902503		-0.454892
gi|118496615|ref|NC_008601.1|	RefSeq	gene	99479	100177	.	+	.	ID=gene87;Name=FTN_0088;Dbxref=GeneID:4548935;gbkey=Gene;locus_tag=FTN_0088	6120	2486	-0.682894	8.48617	0.00102972		-0.682894	0.622914	-0.205572		-0.0919103	-0.0425287		-0.0619751	-0.235297					-0.0905475				-0.0902503			-0.18945	0	-0.0153864			0.137379		-0.0304717		-0.340214
gi|118496615|ref|NC_008601.1|	RefSeq	gene	100182	100994	.	+	.	ID=gene88;Name=FTN_0089;Dbxref=GeneID:4548936;gbkey=Gene;locus_tag=FTN_0089	7343	3719	-0.364657	8.86611	0.0777548		-0.364657	0.776654	-0.109773		-0.177717	-0.1281		-0.0175407	0.183416					-0.0508216				-0.0164209			-0.097125	0	-0.00020261			0.0682195		-0.0164209		-0.185197
gi|118496615|ref|NC_008601.1|	RefSeq	gene	101001	102545	.	-	.	ID=gene89;Name=FTN_0090;Dbxref=GeneID:4548937;gbkey=Gene;locus_tag=FTN_0090	8892	3267	-0.827733	9.2357	6.73966e-05		-0.827733	0.563414	-0.249172		-0.181488	0.100353		0.168673	0.109921					0.0154535							-0.152966	0	-0.0508579			0.0973718		-0.0550561		-0.259877
gi|118496615|ref|NC_008601.1|	RefSeq	gene	102854	103510	.	+	.	ID=gene90;Name=FTN_0091;Dbxref=GeneID:4548938;gbkey=Gene;locus_tag=FTN_0091	3121	768	-1.40593	7.43707	6.0614e-11		-1.40593	0.377376	-0.423226		-0.0521095	-0.067779		-0.130485	-0.0676638												-0.167403	0	-0.00559642			-0.0574873				-0.246514
gi|118496615|ref|NC_008601.1|	RefSeq	gene	103528	104523	.	+	.	ID=gene91;Name=FTN_0092;Dbxref=GeneID:4548939;gbkey=Gene;locus_tag=FTN_0092	2178	837	-0.762845	7.29947	0.000352695		-0.762845	0.589333	-0.229639		-0.117901	-0.218603		0.032113	0.021625												-0.0273401	0	-0.27613							-0.288465
gi|118496615|ref|NC_008601.1|	RefSeq	gene	104604	105119	.	+	.	ID=gene92;Name=FTN_0093;Dbxref=GeneID:4548940;gbkey=Gene;locus_tag=FTN_0093	340	319	0.524616	5.46417	0.0259307		0.524616	1.43855	0.157925		-0.375422	0.073864		-0.218603	0.0877733												-0.284695	0	-0.0994746							-0.177354
gi|118496615|ref|NC_008601.1|	RefSeq	gene	105126	106073	.	-	.	ID=gene93;Name=FTN_0094;Dbxref=GeneID:4548941;gbkey=Gene;locus_tag=FTN_0094	1796	780	-0.586391	6.92889	0.00619936		-0.586391	0.666007	-0.176521		-0.045007	0.0958409		0.0703834	0.0235723												-0.420982	0	0.0747552							-0.378428
gi|118496615|ref|NC_008601.1|	RefSeq	gene	106142	106807	.	-	.	ID=gene94;Name=FTN_0095;Dbxref=GeneID:4548942;gbkey=Gene;locus_tag=FTN_0095	3593	1854	-0.337742	7.7387	0.106001		-0.337742	0.791279	-0.101671		-0.0553021	-0.0508579		-0.0524507	-0.232183												-0.238479	0	0.0951735							-0.105091
gi|118496615|ref|NC_008601.1|	RefSeq	gene	107210	107902	.	+	.	ID=gene95;Name=FTN_0096;Dbxref=GeneID:4548943;gbkey=Gene;locus_tag=FTN_0096	3136	3167	0.630956	8.24625	0.00245839		0.630956	1.54859	0.189937		-0.180851	0.254588		-0.0352853	0.0227252
gi|118496615|ref|NC_008601.1|	RefSeq	gene	107899	109104	.	-	.	ID=gene96;Name=FTN_0097;Dbxref=GeneID:4548944;gbkey=Gene;locus_tag=FTN_0097	1114	699	-0.0555876	7.20356	0.802458		-0.0555876	0.962202	-0.0167335		-0.0782545	-0.029739		0.0364121	-0.175794
gi|118496615|ref|NC_008601.1|	RefSeq	gene	109204	109821	.	+	.	ID=gene97;Name=gidB;Dbxref=GeneID:4548945;gbkey=Gene;gene=gidB;locus_tag=FTN_0098	1033	504	-0.418484	6.49055	0.0581646		-0.418484	0.74821	-0.125976		-0.138965	-0.0984539		0.168217	-0.227137
gi|118496615|ref|NC_008601.1|	RefSeq	gene	109818	110486	.	+	.	ID=gene98;Name=FTN_0099;Dbxref=GeneID:4548946;gbkey=Gene;locus_tag=FTN_0099	1187	686	-0.174226	6.76499	0.423236		-0.174226	0.886243	-0.0524473		-0.0784157	-0.0449685		0.0708023	0.296372
gi|118496615|ref|NC_008601.1|	RefSeq	gene	110479	111495	.	-	.	ID=gene99;Name=FTN_0100;Dbxref=GeneID:4548947;gbkey=Gene;locus_tag=FTN_0100	1117	569	-0.356284	6.65362	0.103507		-0.356284	0.781174	-0.107252		-0.138907	-0.0692593		-0.149857	0.090538
gi|118496615|ref|NC_008601.1|	RefSeq	gene	111566	112462	.	-	.	ID=gene100;Name=FTN_0101;Dbxref=GeneID:4548948;gbkey=Gene;locus_tag=FTN_0101	503	356	0.118074	6.22644	0.620152		0.118074	1.08529	0.0355439		-0.0541515	-0.0766333		-0.220701	-0.142966
gi|118496615|ref|NC_008601.1|	RefSeq	gene	112565	113719	.	+	.	ID=gene101;Name=FTN_0102;Dbxref=GeneID:4548949;gbkey=Gene;locus_tag=FTN_0102	357	304	0.384794	5.82594	0.102633		0.384794	1.30567	0.115834		-0.170564	0.0103695		0.0535283	0.305803
gi|118496615|ref|NC_008601.1|	RefSeq	gene	113785	116088	.	-	.	ID=gene102;Name=FTN_0103;Dbxref=GeneID:4547761;gbkey=Gene;locus_tag=FTN_0103	1717	749	-0.58	7.23544	0.00688552		-0.58	0.668964	-0.174597		-0.189087	0.0747552			-0.0616014
gi|118496615|ref|NC_008601.1|	RefSeq	gene	116266	116862	.	+	.	ID=gene103;Name=FTN_0104;Dbxref=GeneID:4547762;gbkey=Gene;locus_tag=FTN_0104	1055	557	-0.304656	7.27798	0.164783		-0.304656	0.809635	-0.0917105		-0.145134				-0.13625
gi|118496615|ref|NC_008601.1|	RefSeq	gene	116870	117226	.	+	.	ID=gene104;Name=FTN_0105;Dbxref=GeneID:4547763;gbkey=Gene;locus_tag=FTN_0105	671	256	-0.773149	7.74814	0.000806541		-0.773149	0.585139	-0.232741		0.0279049				-0.202652
gi|118496615|ref|NC_008601.1|	RefSeq	gene	117300	117572	.	-	.	ID=gene105;Name=rpsT;Dbxref=GeneID:4547764;gbkey=Gene;gene=rpsT;locus_tag=FTN_0106	895	262	-1.15523	8.37798	4.78061e-07		-1.15523	0.448994	-0.347759						-0.220047
gi|118496615|ref|NC_008601.1|	RefSeq	gene	117842	119626	.	+	.	ID=gene106;Name=lepA;Dbxref=GeneID:4547765;gbkey=Gene;gene=lepA;locus_tag=FTN_0107	7923	4930	-0.0676683	9.40355	0.743379		-0.0676683	0.954179	-0.0203702						-0.0807668
gi|118496615|ref|NC_008601.1|	RefSeq	gene	119640	120719	.	+	.	ID=gene107;Name=mnmA;Dbxref=GeneID:4547766;gbkey=Gene;gene=mnmA;locus_tag=FTN_0108	6928	5629	0.317223	9.16131	0.124056		0.317223	1.24593	0.0954937						-0.0987854
gi|118496615|ref|NC_008601.1|	RefSeq	gene	120737	121717	.	-	.	ID=gene108;Name=FTN_0109;Dbxref=GeneID:4547767;gbkey=Gene;locus_tag=FTN_0109	8232	3136	-0.775509	9.00547	0.000188069		-0.775509	0.584182	-0.233451						-0.0868388
gi|118496615|ref|NC_008601.1|	RefSeq	gene	121812	122336	.	-	.	ID=gene109;Name=FTN_0110;Dbxref=GeneID:4547768;gbkey=Gene;locus_tag=FTN_0110	1066	681	-0.0296869	6.62433	0.893949		-0.0296869	0.979633	-0.00893665						-0.0737042
gi|118496615|ref|NC_008601.1|	RefSeq	gene	122333	122776	.	-	.	ID=gene110;Name=ribH;Dbxref=GeneID:4547769;gbkey=Gene;gene=ribH;locus_tag=FTN_0111	3266	2215	0.0565689	7.85159	0.787688		0.0565689	1.03999	0.0170289						-0.0561749
gi|118496615|ref|NC_008601.1|	RefSeq	gene	122786	123997	.	-	.	ID=gene111;Name=ribAB;Dbxref=GeneID:4547770;gbkey=Gene;gene=ribAB;locus_tag=FTN_0112	4442	2491	-0.217687	8.32591	0.295207		-0.217687	0.859943	-0.0655303						-0.109732
gi|118496615|ref|NC_008601.1|	RefSeq	gene	123990	124595	.	-	.	ID=gene112;Name=ribC;Dbxref=GeneID:4547771;gbkey=Gene;gene=ribC;locus_tag=FTN_0113	1170	638	-0.258054	6.488	0.234854		-0.258054	0.836215	-0.077682						-0.151321
gi|118496615|ref|NC_008601.1|	RefSeq	gene	124588	125655	.	-	.	ID=gene113;Name=ribD;Dbxref=GeneID:4547772;gbkey=Gene;gene=ribD;locus_tag=FTN_0114	964	565	-0.153967	7.26914	0.484205		-0.153967	0.898776	-0.0463487						0.0925109
gi|118496615|ref|NC_008601.1|	RefSeq	gene	126046	127296	.	+	.	ID=gene114;Name=FTN_0115;Dbxref=GeneID:4547773;gbkey=Gene;locus_tag=FTN_0115	2275	1251	-0.245977	7.15283	0.244478		-0.245977	0.843244	-0.0740466						-0.0280527
gi|118496615|ref|NC_008601.1|	RefSeq	gene	127306	129003	.	-	.	ID=gene115;Name=ipdC;Dbxref=GeneID:4547774;gbkey=Gene;gene=ipdC;locus_tag=FTN_0116	9930	5265	-0.298566	9.19247	0.147374		-0.298566	0.81306	-0.0898772						0.00245109
gi|118496615|ref|NC_008601.1|	RefSeq	gene	129104	129457	.	-	.	ID=gene116;Name=FTN_0117;Dbxref=GeneID:4547775;gbkey=Gene;locus_tag=FTN_0117	5273	1747	-0.976915	7.96403	3.20429e-06		-0.976915	0.508065	-0.294081						0.120944
gi|118496615|ref|NC_008601.1|	RefSeq	gene	129531	130454	.	+	.	ID=gene117;Name=FTN_0118;Dbxref=GeneID:4547776;gbkey=Gene;locus_tag=FTN_0118	2929	1328	-0.524331	7.51218	0.0127305		-0.524331	0.695282	-0.157839						0.044783
gi|118496615|ref|NC_008601.1|	RefSeq	gene	130544	131083	.	+	.	ID=gene118;Name=FTN_0119;Dbxref=GeneID:4547777;gbkey=Gene;locus_tag=FTN_0119	7442	5597	0.205749	9.33283	0.318313		0.205749	1.15328	0.0619366						-0.139265
gi|118496615|ref|NC_008601.1|	RefSeq	gene	131219	131641	.	+	.	ID=gene119;Name=FTN_0120;Dbxref=GeneID:4547778;gbkey=Gene;locus_tag=FTN_0120	4584	2790	-0.099549	8.44653	0.632379		-0.099549	0.933325	-0.0299672						0.140177
gi|118496615|ref|NC_008601.1|	RefSeq	gene	131668	132117	.	+	.	ID=gene120;Name=secB1;Dbxref=GeneID:4547779;gbkey=Gene;gene=secB1;locus_tag=FTN_0121	3486	1755	-0.373293	8.35449	0.0742968		-0.373293	0.772018	-0.112373						0.253303
gi|118496615|ref|NC_008601.1|	RefSeq	gene	132141	133220	.	+	.	ID=gene121;Name=recA;Dbxref=GeneID:4548478;gbkey=Gene;gene=recA;locus_tag=FTN_0122	7338	4588	-0.0607307	9.49036	0.769194		-0.0607307	0.958778	-0.0182818						0.164155
gi|118496615|ref|NC_008601.1|	RefSeq	gene	133207	133659	.	+	.	ID=gene122;Name=recX;Dbxref=GeneID:4548479;gbkey=Gene;gene=recX;locus_tag=FTN_0123	448	286	-0.0306836	6.11746	0.902832		-0.0306836	0.978956	-0.00923667						0.311213
gi|118496615|ref|NC_008601.1|	RefSeq	gene	133833	134312	.	+	.	ID=gene123;Name=ssb;Dbxref=GeneID:4548480;gbkey=Gene;gene=ssb;locus_tag=FTN_0124	1179	535	-0.523082	6.98103	0.0165177		-0.523082	0.695883	-0.157464						0.122967
gi|118496615|ref|NC_008601.1|	RefSeq	gene	134418	135572	.	+	.	ID=gene124;Name=ackA;Dbxref=GeneID:4548481;gbkey=Gene;gene=ackA;locus_tag=FTN_0125	1453	1153	0.283121	7.57063	0.183834		0.283121	1.21682	0.0852278						-0.182971
gi|118496615|ref|NC_008601.1|	RefSeq	gene	135582	137678	.	+	.	ID=gene125;Name=pta;Dbxref=GeneID:4548482;gbkey=Gene;gene=pta;locus_tag=FTN_0126	3363	2258	0.0420844	8.53966	0.841585		0.0420844	1.0296	0.0126687						0.0181542
gi|118496615|ref|NC_008601.1|	RefSeq	gene	137693	139126	.	+	.	ID=gene126;Name=gabD;Dbxref=GeneID:4548483;gbkey=Gene;gene=gabD;locus_tag=FTN_0127	1297	972	0.200617	7.47719	0.35006		0.200617	1.14919	0.0603919						0.342931
gi|118496615|ref|NC_008601.1|	RefSeq	gene	139163	140371	.	+	.	ID=gene127;Name=FTN_0128;Dbxref=GeneID:4548484;gbkey=Gene;locus_tag=FTN_0128	676	590	0.4204	6.56156	0.0581258		0.4204	1.3383	0.126553						0.114783
gi|118496615|ref|NC_008601.1|	RefSeq	gene	140546	142324	.	+	.	ID=gene128;Name=aspS;Dbxref=GeneID:4548485;gbkey=Gene;gene=aspS;locus_tag=FTN_0129	4230	2734	-0.0128544	9.1989	0.952253		-0.0128544	0.99113	-0.00386956						0.330812
gi|118496615|ref|NC_008601.1|	RefSeq	gene	142461	143405	.	+	.	ID=gene129;Name=FTN_0130;Dbxref=GeneID:4548486;gbkey=Gene;locus_tag=FTN_0130	2338	1088	-0.486769	7.42228	0.0215078		-0.486769	0.713621	-0.146532						0.295743
gi|118496615|ref|NC_008601.1|	RefSeq	gene	143587	144894	.	-	.	ID=gene130;Name=FTN_0131;Dbxref=GeneID:4548487;gbkey=Gene;locus_tag=FTN_0131	9502	4459	-0.474712	9.06102	0.0214939		-0.474712	0.71961	-0.142903						0.0464687
gi|118496615|ref|NC_008601.1|	RefSeq	gene	145232	146200	.	-	.	ID=gene131;Name=FTN_0132;Dbxref=GeneID:4548488;gbkey=Gene;locus_tag=FTN_0132	2972	984	-0.977843	7.32861	4.18502e-06		-0.977843	0.507738	-0.29436						0.204433
gi|118496615|ref|NC_008601.1|	RefSeq	gene	146389	148245	.	+	.	ID=gene132;Name=FTN_0133;Dbxref=GeneID:4548489;gbkey=Gene;locus_tag=FTN_0133	3634	2415	0.0272532	8.14775	0.897433		0.0272532	1.01907	0.00820403						-0.00950683
gi|118496615|ref|NC_008601.1|	RefSeq	gene	148576	149244	.	+	.	ID=gene133;Name=FTN_0134;Dbxref=GeneID:4548490;gbkey=Gene;locus_tag=FTN_0134	746	404	-0.267971	6.36287	0.233619		-0.267971	0.830487	-0.0806673						-0.063319
gi|118496615|ref|NC_008601.1|	RefSeq	gene	149241	150143	.	+	.	ID=gene134;Name=hemC;Dbxref=GeneID:4548491;gbkey=Gene;gene=hemC;locus_tag=FTN_0135	1498	958	-0.0281476	7.14279	0.899434		-0.0281476	0.980679	-0.00847328						-0.0826756
gi|118496615|ref|NC_008601.1|	RefSeq	gene	150192	150536	.	+	.	ID=gene135;Name=crcB;Dbxref=GeneID:4548492;gbkey=Gene;gene=crcB;locus_tag=FTN_0136	867	602	0.0905057	6.17046	0.686819		0.0905057	1.06474	0.0272449						-0.11637
gi|118496615|ref|NC_008601.1|	RefSeq	gene	150533	150940	.	+	.	ID=gene136;Name=FTN_0137;Dbxref=GeneID:4548493;gbkey=Gene;locus_tag=FTN_0137	598	453	0.216104	5.77114	0.338507		0.216104	1.16159	0.0650539						-0.256903
gi|118496615|ref|NC_008601.1|	RefSeq	gene	151080	151697	.	+	.	ID=gene137;Name=FTN_0138;Dbxref=GeneID:4548494;gbkey=Gene;locus_tag=FTN_0138	254	210	0.342169	5.85739	0.16759		0.342169	1.26766	0.103003						-0.454706
gi|118496615|ref|NC_008601.1|	RefSeq	gene	151694	151867	.	-	.	ID=gene138;Name=FTN_0139;Dbxref=GeneID:4548495;gbkey=Gene;locus_tag=FTN_0139	83	75	0.469838	4.2959	0.136389		0.469838	1.38495	0.141435	FPI					-0.0519113
gi|118496615|ref|NC_008601.1|	RefSeq	gene	151997	153796	.	+	.	ID=gene139;Name=FTN_0140;Dbxref=GeneID:4548496;gbkey=Gene;locus_tag=FTN_0140	17839	5967	-0.963156	9.98123	3.3456e-06		-0.963156	0.512934	-0.289939	FPI					-0.150441
gi|118496615|ref|NC_008601.1|	RefSeq	gene	153815	155131	.	+	.	ID=gene140;Name=FTN_0141;Dbxref=GeneID:4548497;gbkey=Gene;locus_tag=FTN_0141	14790	7448	-0.372903	9.90743	0.0697925		-0.372903	0.772227	-0.112255	FPI
gi|118496615|ref|NC_008601.1|	RefSeq	gene	155218	156759	.	+	.	ID=gene141;Name=FTN_0142;Dbxref=GeneID:4548152;gbkey=Gene;locus_tag=FTN_0142	2304	1217	-0.304	7.62018	0.150282		-0.304	0.810004	-0.091513	FPI
gi|118496615|ref|NC_008601.1|	RefSeq	gene	156853	158739	.	+	.	ID=gene142;Name=FTN_0143;Dbxref=GeneID:4548153;gbkey=Gene;locus_tag=FTN_0143	4250	2607	-0.0882795	8.47115	0.671989		-0.0882795	0.940644	-0.0265748	FPI
gi|118496615|ref|NC_008601.1|	RefSeq	gene	158724	159263	.	+	.	ID=gene143;Name=paaY;Dbxref=GeneID:4548154;gbkey=Gene;gene=paaY;locus_tag=FTN_0144	917	935	0.644748	6.75032	0.00291849		0.644748	1.56347	0.194089	FPI
gi|118496615|ref|NC_008601.1|	RefSeq	gene	159214	159858	.	+	.	ID=gene144;Name=lolB;Dbxref=GeneID:4548155;gbkey=Gene;gene=lolB;locus_tag=FTN_0145	868	439	-0.366612	6.3543	0.0997797		-0.366612	0.775602	-0.110361	FPI
gi|118496615|ref|NC_008601.1|	RefSeq	gene	159846	160673	.	+	.	ID=gene145;Name=ipk;Dbxref=GeneID:4548156;gbkey=Gene;gene=ipk;locus_tag=FTN_0146	703	457	-0.00453999	6.09124	0.990838		-0.00453999	0.996858	-0.00136667	FPI
gi|118496615|ref|NC_008601.1|	RefSeq	gene	160692	160766	.	-	.	ID=gene146;Name=FTN_0147;Dbxref=GeneID:4548157;gbkey=Gene;locus_tag=FTN_0147	42	31	0.178065	3.42129	0.762208		0.178065	1.13137	0.0536029	FPI
gi|118496615|ref|NC_008601.1|	RefSeq	gene	160862	161491	.	+	.	ID=gene147;Name=FTN_0148;Dbxref=GeneID:4548158;gbkey=Gene;locus_tag=FTN_0148	487	226	-0.490628	7.12243	0.0370151		-0.490628	0.711715	-0.147694	FPI
gi|118496615|ref|NC_008601.1|	RefSeq	gene	161561	162475	.	+	.	ID=gene148;Name=FTN_0149;Dbxref=GeneID:4548159;gbkey=Gene;locus_tag=FTN_0149	3191	1730	-0.266433	8.62579	0.20321		-0.266433	0.831372	-0.0802044	FPI
gi|118496615|ref|NC_008601.1|	RefSeq	gene	162491	163060	.	+	.	ID=gene149;Name=FTN_0150;Dbxref=GeneID:4548160;gbkey=Gene;locus_tag=FTN_0150	1074	476	-0.557075	7.15517	0.0112925		-0.557075	0.679679	-0.167696	FPI
gi|118496615|ref|NC_008601.1|	RefSeq	gene	163054	163836	.	-	.	ID=gene150;Name=FTN_0151;Dbxref=GeneID:4548161;gbkey=Gene;locus_tag=FTN_0151	705	402	-0.193594	7.05253	0.38838		-0.193594	0.874425	-0.0582775	FPI
gi|118496615|ref|NC_008601.1|	RefSeq	gene	163865	165589	.	-	.	ID=gene151;Name=FTN_0152;Dbxref=GeneID:4548162;gbkey=Gene;locus_tag=FTN_0152	701	423	-0.111942	7.82132	0.625188		-0.111942	0.925342	-0.0336979	FPI
gi|118496615|ref|NC_008601.1|	RefSeq	gene	166018	166443	.	-	.	ID=gene152;Name=FTN_0153;Dbxref=GeneID:4548163;gbkey=Gene;locus_tag=FTN_0153	786	245	-1.06465	5.68324	4.18625e-06		-1.06465	0.478087	-0.320493	FPI
gi|118496615|ref|NC_008601.1|	RefSeq	gene	166430	167899	.	-	.	ID=gene153;Name=rimK;Dbxref=GeneID:4548164;gbkey=Gene;gene=rimK;locus_tag=FTN_0154	3293	726	-1.56444	7.78127	4.09094e-13		-1.56444	0.338109	-0.470944	FPI
gi|118496615|ref|NC_008601.1|	RefSeq	gene	168063	170078	.	+	.	ID=gene154;Name=FTN_0155;Dbxref=GeneID:4548165;gbkey=Gene;locus_tag=FTN_0155	595	450	0.213774	6.56815	0.342693		0.213774	1.15972	0.0643525
gi|118496615|ref|NC_008601.1|	RefSeq	gene	170179	171066	.	+	.	ID=gene155;Name=plsC;Dbxref=GeneID:4548166;gbkey=Gene;gene=plsC;locus_tag=FTN_0156	404	338	0.359338	5.88092	0.123066		0.359338	1.28284	0.108172
gi|118496615|ref|NC_008601.1|	RefSeq	gene	171468	172004	.	-	.	ID=gene156;Name=FTN_0157;Dbxref=GeneID:4548167;gbkey=Gene;locus_tag=FTN_0157	1670	874	-0.317321	7.89235	0.137972		-0.317321	0.802559	-0.0955232
gi|118496615|ref|NC_008601.1|	RefSeq	gene	172102	172644	.	-	.	ID=gene157;Name=FTN_0158;Dbxref=GeneID:4548168;gbkey=Gene;locus_tag=FTN_0158	892	710	0.287521	6.39072	0.186755		0.287521	1.22054	0.0865523
gi|118496615|ref|NC_008601.1|	RefSeq	gene	172767	174437	.	-	.	ID=gene158;Name=rpsA;Dbxref=GeneID:4548169;gbkey=Gene;gene=rpsA;locus_tag=FTN_0159	75089	67465	0.462326	12.9502	0.0240265		0.462326	1.37776	0.139174
gi|118496615|ref|NC_008601.1|	RefSeq	gene	174585	175046	.	+	.	ID=gene159;Name=FTN_0160;Dbxref=GeneID:4548760;gbkey=Gene;locus_tag=FTN_0160	2545	1311	-0.340186	7.31088	0.106497		-0.340186	0.78994	-0.102406
gi|118496615|ref|NC_008601.1|	RefSeq	gene	175050	175940	.	+	.	ID=gene160;Name=ddlB;Dbxref=GeneID:4548761;gbkey=Gene;gene=ddlB;locus_tag=FTN_0161	4511	2271	-0.373316	8.76741	0.0728497		-0.373316	0.772006	-0.112379
gi|118496615|ref|NC_008601.1|	RefSeq	gene	175937	176620	.	+	.	ID=gene161;Name=ftsQ;Dbxref=GeneID:4548762;gbkey=Gene;gene=ftsQ;locus_tag=FTN_0162	852	308	-0.850928	6.73378	0.000177866		-0.850928	0.554428	-0.256155
gi|118496615|ref|NC_008601.1|	RefSeq	gene	176722	177984	.	+	.	ID=gene162;Name=ftsA;Dbxref=GeneID:4548763;gbkey=Gene;gene=ftsA;locus_tag=FTN_0163	11305	6776	-0.121664	9.97506	0.554404		-0.121664	0.919127	-0.0366245
gi|118496615|ref|NC_008601.1|	RefSeq	gene	178028	179173	.	+	.	ID=gene163;Name=ftsZ;Dbxref=GeneID:4548764;gbkey=Gene;gene=ftsZ;locus_tag=FTN_0164	9758	5897	-0.109813	9.97846	0.594089		-0.109813	0.926708	-0.033057
gi|118496615|ref|NC_008601.1|	RefSeq	gene	179199	180056	.	+	.	ID=gene164;Name=lpxC;Dbxref=GeneID:4548765;gbkey=Gene;gene=lpxC;locus_tag=FTN_0165	5867	4545	0.248441	9.33649	0.229188		0.248441	1.18792	0.0747882
gi|118496615|ref|NC_008601.1|	RefSeq	gene	180070	181710	.	-	.	ID=gene165;Name=dnaX;Dbxref=GeneID:4548766;gbkey=Gene;gene=dnaX;locus_tag=FTN_0166	4573	2557	-0.221891	8.62664	0.285746		-0.221891	0.857441	-0.0667959
gi|118496615|ref|NC_008601.1|	RefSeq	gene	181982	182959	.	+	.	ID=gene166;Name=prfB;Dbxref=GeneID:4548767;gbkey=Gene;gene=prfB;locus_tag=FTN_0167	9683	21761	1.78499	10.5186	2.70816e-17		1.78499	3.44617	0.537336
gi|118496615|ref|NC_008601.1|	RefSeq	gene	183091	184821	.	+	.	ID=gene167;Name=lysU;Dbxref=GeneID:4548768;gbkey=Gene;gene=lysU;locus_tag=FTN_0168	10130	10297	0.640372	10.1432	0.0018914		0.640372	1.55873	0.192771
gi|118496615|ref|NC_008601.1|	RefSeq	gene	185205	185747	.	-	.	ID=gene168;Name=FTN_0169;Dbxref=GeneID:4548769;gbkey=Gene;locus_tag=FTN_0169	570	312	-0.252553	6.72646	0.273343		-0.252553	0.83941	-0.076026
gi|118496615|ref|NC_008601.1|	RefSeq	gene	185846	186718	.	-	.	ID=gene169;Name=FTN_0170;Dbxref=GeneID:4548770;gbkey=Gene;locus_tag=FTN_0170	519	197	-0.780447	5.71552	0.00105151		-0.780447	0.582186	-0.234938
gi|118496615|ref|NC_008601.1|	RefSeq	gene	186727	188268	.	-	.	ID=gene170;Name=glsA;Dbxref=GeneID:4548771;gbkey=Gene;gene=glsA;locus_tag=FTN_0171	2364	1679	0.123154	7.89996	0.558792		0.123154	1.08911	0.0370731
gi|118496615|ref|NC_008601.1|	RefSeq	gene	188350	189387	.	-	.	ID=gene171;Name=glnA;Dbxref=GeneID:4548772;gbkey=Gene;gene=glnA;locus_tag=FTN_0172	62238	21581	-0.911241	11.5619	9.95903e-06		-0.911241	0.531727	-0.274311
gi|118496615|ref|NC_008601.1|	RefSeq	gene	189507	190484	.	-	.	ID=gene172;Name=holA;Dbxref=GeneID:4548773;gbkey=Gene;gene=holA;locus_tag=FTN_0173	1625	717	-0.563541	6.55665	0.00884485		-0.563541	0.676639	-0.169643
gi|118496615|ref|NC_008601.1|	RefSeq	gene	190570	191088	.	+	.	ID=gene173;Name=blc;Dbxref=GeneID:4548774;gbkey=Gene;gene=blc;locus_tag=FTN_0174	472	152	-1.01745	5.00123	3.27766e-05		-1.01745	0.493988	-0.306284
gi|118496615|ref|NC_008601.1|	RefSeq	gene	191251	192876	.	+	.	ID=gene174;Name=FTN_0175;Dbxref=GeneID:4548775;gbkey=Gene;locus_tag=FTN_0175	1090	657	-0.113557	6.78417	0.602839		-0.113557	0.924306	-0.034184
gi|118496615|ref|NC_008601.1|	RefSeq	gene	193022	194290	.	+	.	ID=gene175;Name=FTN_0176;Dbxref=GeneID:4548776;gbkey=Gene;locus_tag=FTN_0176	840	707	0.368052	7.09525	0.0918166		0.368052	1.29061	0.110795
gi|118496615|ref|NC_008601.1|	RefSeq	gene	194356	195903	.	-	.	ID=gene176;Name=purH;Dbxref=GeneID:4548777;gbkey=Gene;gene=purH;locus_tag=FTN_0177	2843	1536	-0.27143	8.09008	0.196157		-0.27143	0.828498	-0.0817087
gi|118496615|ref|NC_008601.1|	RefSeq	gene	196080	197366	.	+	.	ID=gene177;Name=purA;Dbxref=GeneID:4548778;gbkey=Gene;gene=purA;locus_tag=FTN_0178	18252	15945	0.421836	10.4617	0.0398821		0.421836	1.33963	0.126985
gi|118496615|ref|NC_008601.1|	RefSeq	gene	197370	197903	.	+	.	ID=gene178;Name=hpt;Dbxref=GeneID:4548779;gbkey=Gene;gene=hpt;locus_tag=FTN_0179	8598	6456	0.203426	9.23257	0.323243		0.203426	1.15143	0.0612372
gi|118496615|ref|NC_008601.1|	RefSeq	gene	197922	198641	.	-	.	ID=gene179;Name=FTN_0180;Dbxref=GeneID:4547417;gbkey=Gene;locus_tag=FTN_0180	786	516	0.00962946	6.5863	0.975332		0.00962946	1.0067	0.00289876
gi|118496615|ref|NC_008601.1|	RefSeq	gene	198739	199581	.	-	.	ID=gene180;Name=FTN_0181;Dbxref=GeneID:4547418;gbkey=Gene;locus_tag=FTN_0181	557	366	0.0109529	6.11754	0.977419		0.0109529	1.00762	0.00329716
gi|118496615|ref|NC_008601.1|	RefSeq	gene	199523	200200	.	-	.	ID=gene181;Name=FTN_0182;Dbxref=GeneID:4547419;gbkey=Gene;locus_tag=FTN_0182	2835	1795	-0.042573	7.82888	0.840979		-0.042573	0.970922	-0.0128158
gi|118496615|ref|NC_008601.1|	RefSeq	gene	200202	201119	.	-	.	ID=gene182;Name=FTN_0183;Dbxref=GeneID:4547420;gbkey=Gene;locus_tag=FTN_0183	5698	2385	-0.639655	8.71947	0.00211485		-0.639655	0.641866	-0.192555
gi|118496615|ref|NC_008601.1|	RefSeq	gene	201194	202417	.	-	.	ID=gene183;Name=FTN_0184;Dbxref=GeneID:4547421;gbkey=Gene;locus_tag=FTN_0184	691	506	0.167207	7.15379	0.459437		0.167207	1.12288	0.0503342
gi|118496615|ref|NC_008601.1|	RefSeq	gene	202538	203002	.	-	.	ID=gene184;Name=FTN_0185;Dbxref=GeneID:4547422;gbkey=Gene;locus_tag=FTN_0185	914	609	0.0310325	6.95114	0.893918		0.0310325	1.02174	0.00934173
gi|118496615|ref|NC_008601.1|	RefSeq	gene	203013	203609	.	-	.	ID=gene185;Name=wrbA;Dbxref=GeneID:4547423;gbkey=Gene;gene=wrbA;locus_tag=FTN_0186	1229	886	0.144666	7.32887	0.503055		0.144666	1.10547	0.0435489
gi|118496615|ref|NC_008601.1|	RefSeq	gene	203616	204812	.	+	.	ID=gene186;Name=rbn;Dbxref=GeneID:4547424;gbkey=Gene;gene=rbn;locus_tag=FTN_0187	881	422	-0.44502	6.07298	0.045313		-0.44502	0.734574	-0.133964
gi|118496615|ref|NC_008601.1|	RefSeq	gene	204831	205406	.	+	.	ID=gene187;Name=FTN_0188;Dbxref=GeneID:4547425;gbkey=Gene;locus_tag=FTN_0188	491	253	-0.339678	5.42401	0.149048		-0.339678	0.790218	-0.102253	FPI
gi|118496615|ref|NC_008601.1|	RefSeq	gene	205403	207556	.	+	.	ID=gene188;Name=priA;Dbxref=GeneID:4547426;gbkey=Gene;gene=priA;locus_tag=FTN_0189	1425	862	-0.108401	6.95012	0.616227		-0.108401	0.927616	-0.0326318
gi|118496615|ref|NC_008601.1|	RefSeq	gene	207623	208801	.	-	.	ID=gene189;Name=FTN_0190;Dbxref=GeneID:4547427;gbkey=Gene;locus_tag=FTN_0190	378	446	0.855189	5.97512	0.00019946		0.855189	1.809	0.257437
gi|118496615|ref|NC_008601.1|	RefSeq	gene	208869	209609	.	-	.	ID=gene190;Name=FTN_0191;Dbxref=GeneID:4547428;gbkey=Gene;locus_tag=FTN_0191	1850	692	-0.801804	7.31794	0.000200334		-0.801804	0.573631	-0.241367
gi|118496615|ref|NC_008601.1|	RefSeq	gene	209802	210995	.	-	.	ID=gene191;Name=cydB;Dbxref=GeneID:4547429;gbkey=Gene;gene=cydB;locus_tag=FTN_0192	16815	11079	0.0148683	10.4049	0.94259		0.0148683	1.01036	0.00447581
gi|118496615|ref|NC_008601.1|	RefSeq	gene	211006	212760	.	-	.	ID=gene192;Name=cydA;Dbxref=GeneID:4547430;gbkey=Gene;gene=cydA;locus_tag=FTN_0193	108726	105261	0.570063	13.162	0.00543181		0.570063	1.48459	0.171606
gi|118496615|ref|NC_008601.1|	RefSeq	gene	213217	214584	.	-	.	ID=gene193;Name=FTN_0194;Dbxref=GeneID:4547431;gbkey=Gene;locus_tag=FTN_0194	586	425	0.153314	6.15759	0.501923		0.153314	1.11212	0.0461522
gi|118496615|ref|NC_008601.1|	RefSeq	gene	216593	217495	.	+	.	ID=gene194;Name=cyoA;Dbxref=GeneID:4547432;gbkey=Gene;gene=cyoA;locus_tag=FTN_0195	9693	3410	-0.890363	10.6048	1.82597e-05		-0.890363	0.539478	-0.268026
gi|118496615|ref|NC_008601.1|	RefSeq	gene	217534	219564	.	+	.	ID=gene195;Name=cyoB;Dbxref=GeneID:4547433;gbkey=Gene;gene=cyoB;locus_tag=FTN_0196	26850	12870	-0.444118	11.7083	0.0305153		-0.444118	0.735034	-0.133693
gi|118496615|ref|NC_008601.1|	RefSeq	gene	219561	220163	.	+	.	ID=gene196;Name=cyoC;Dbxref=GeneID:4547434;gbkey=Gene;gene=cyoC;locus_tag=FTN_0197	5138	2292	-0.547791	9.35816	0.00849131		-0.547791	0.684067	-0.164901
gi|118496615|ref|NC_008601.1|	RefSeq	gene	220165	220497	.	+	.	ID=gene197;Name=cyoD;Dbxref=GeneID:4547550;gbkey=Gene;gene=cyoD;locus_tag=FTN_0198	3856	1389	-0.856223	8.3857	4.73274e-05		-0.856223	0.552397	-0.257749
gi|118496615|ref|NC_008601.1|	RefSeq	gene	220528	221376	.	+	.	ID=gene198;Name=cyoE;Dbxref=GeneID:4547551;gbkey=Gene;gene=cyoE;locus_tag=FTN_0199	2299	821	-0.868684	7.65418	4.78349e-05		-0.868684	0.547646	-0.2615
gi|118496615|ref|NC_008601.1|	RefSeq	gene	221521	222564	.	-	.	ID=gene199;Name=FTN_0200;Dbxref=GeneID:4547552;gbkey=Gene;locus_tag=FTN_0200	1990	1338	0.0440959	7.69813	0.837298		0.0440959	1.03104	0.0132742
gi|118496615|ref|NC_008601.1|	RefSeq	gene	222639	223334	.	-	.	ID=gene200;Name=FTN_0201;Dbxref=GeneID:4547553;gbkey=Gene;locus_tag=FTN_0201	657	331	-0.372175	5.80475	0.101397		-0.372175	0.772617	-0.112036
gi|118496615|ref|NC_008601.1|	RefSeq	gene	223334	224185	.	-	.	ID=gene201;Name=pdxY;Dbxref=GeneID:4547554;gbkey=Gene;gene=pdxY;locus_tag=FTN_0202	1432	647	-0.529337	6.91044	0.0143969		-0.529337	0.692873	-0.159346
gi|118496615|ref|NC_008601.1|	RefSeq	gene	224192	224626	.	-	.	ID=gene202;Name=FTN_0203;Dbxref=GeneID:4547555;gbkey=Gene;locus_tag=FTN_0203	857	307	-0.864058	6.15734	0.000143455		-0.864058	0.549405	-0.260107
gi|118496615|ref|NC_008601.1|	RefSeq	gene	224772	225728	.	+	.	ID=gene203;Name=FTN_0204;Dbxref=GeneID:4547556;gbkey=Gene;locus_tag=FTN_0204	2145	1233	-0.182002	7.3227	0.390191		-0.182002	0.881479	-0.0547879
gi|118496615|ref|NC_008601.1|	RefSeq	gene	225741	226652	.	+	.	ID=gene204;Name=FTN_0205;Dbxref=GeneID:4547557;gbkey=Gene;locus_tag=FTN_0205	1090	580	-0.293369	6.45138	0.179263		-0.293369	0.815995	-0.0883128
gi|118496615|ref|NC_008601.1|	RefSeq	gene	226642	227118	.	+	.	ID=gene205;Name=FTN_0206;Dbxref=GeneID:4547558;gbkey=Gene;locus_tag=FTN_0206	455	246	-0.27032	5.23148	0.252471		-0.27032	0.829136	-0.0813744
gi|118496615|ref|NC_008601.1|	RefSeq	gene	227115	228116	.	+	.	ID=gene206;Name=FTN_0207;Dbxref=GeneID:4547559;gbkey=Gene;locus_tag=FTN_0207	1960	1404	0.135469	7.33799	0.522404		0.135469	1.09845	0.0407802
gi|118496615|ref|NC_008601.1|	RefSeq	gene	228118	229116	.	+	.	ID=gene207;Name=FTN_0208;Dbxref=GeneID:4547560;gbkey=Gene;locus_tag=FTN_0208	1875	1324	0.114793	7.22664	0.588934		0.114793	1.08282	0.0345562
gi|118496615|ref|NC_008601.1|	RefSeq	gene	229107	229976	.	+	.	ID=gene208;Name=FTN_0209;Dbxref=GeneID:4547561;gbkey=Gene;locus_tag=FTN_0209	1271	1229	0.568255	6.86386	0.00768395		0.568255	1.48273	0.171062
gi|118496615|ref|NC_008601.1|	RefSeq	gene	229966	231591	.	+	.	ID=gene209;Name=FTN_0210;Dbxref=GeneID:4547562;gbkey=Gene;locus_tag=FTN_0210	1189	841	0.117204	6.93588	0.589159		0.117204	1.08463	0.035282
gi|118496615|ref|NC_008601.1|	RefSeq	gene	231598	232266	.	+	.	ID=gene210;Name=pcp;Dbxref=GeneID:4547563;gbkey=Gene;gene=pcp;locus_tag=FTN_0211	3353	1380	-0.663957	7.54513	0.00159174		-0.663957	0.631145	-0.199871
gi|118496615|ref|NC_008601.1|	RefSeq	gene	232274	232756	.	+	.	ID=gene211;Name=FTN_0212;Dbxref=GeneID:4547564;gbkey=Gene;locus_tag=FTN_0212	1617	595	-0.825464	6.42909	0.000144459		-0.825464	0.564301	-0.24849
gi|118496615|ref|NC_008601.1|	RefSeq	gene	232787	233227	.	+	.	ID=gene212;Name=holC;Dbxref=GeneID:4547565;gbkey=Gene;gene=holC;locus_tag=FTN_0213	498	168	-0.950486	4.9987	9.38606e-05		-0.950486	0.517458	-0.286125
gi|118496615|ref|NC_008601.1|	RefSeq	gene	234222	236981	.	+	.	ID=gene213;Name=valS;Dbxref=GeneID:4547566;gbkey=Gene;gene=valS;locus_tag=FTN_0214	8141	7009	0.400786	10.1022	0.0517535		0.400786	1.32023	0.120649
gi|118496615|ref|NC_008601.1|	RefSeq	gene	237281	237946	.	+	.	ID=gene214;Name=FTN_0215;Dbxref=GeneID:4547567;gbkey=Gene;locus_tag=FTN_0215	690	443	-0.0224951	6.074	0.934435		-0.0224951	0.984528	-0.00677171
gi|118496615|ref|NC_008601.1|	RefSeq	gene	238094	238429	.	+	.	ID=gene215;Name=FTN_0216;Dbxref=GeneID:4547568;gbkey=Gene;locus_tag=FTN_0216	169	107	-0.0425842	5.03103	0.905326		-0.0425842	0.970914	-0.0128191
gi|118496615|ref|NC_008601.1|	RefSeq	gene	238426	239583	.	-	.	ID=gene216;Name=FTN_0217;Dbxref=GeneID:4547817;gbkey=Gene;locus_tag=FTN_0217	522	324	-0.0712453	6.75187	0.758159		-0.0712453	0.951816	-0.021447
gi|118496615|ref|NC_008601.1|	RefSeq	gene	240473	241126	.	-	.	ID=gene217;Name=nfnB;Dbxref=GeneID:4547818;gbkey=Gene;gene=nfnB;locus_tag=FTN_0218	634	365	-0.179751	5.68843	0.439399		-0.179751	0.882855	-0.0541105
gi|118496615|ref|NC_008601.1|	RefSeq	gene	241266	241643	.	+	.	ID=gene218;Name=FTN_0219;Dbxref=GeneID:4547819;gbkey=Gene;locus_tag=FTN_0219	150	98	0.00267801	4.25607	1		0.00267801	1.00186	0.000806162
gi|118496615|ref|NC_008601.1|	RefSeq	gene	241817	243208	.	+	.	ID=gene219;Name=fumC;Dbxref=GeneID:4547820;gbkey=Gene;gene=fumC;locus_tag=FTN_0220	694	549	0.278605	6.55906	0.211056		0.278605	1.21302	0.0838684
gi|118496615|ref|NC_008601.1|	RefSeq	gene	243339	244745	.	+	.	ID=gene220;Name=gltX;Dbxref=GeneID:4547821;gbkey=Gene;gene=gltX;locus_tag=FTN_0221	4093	3585	0.42559	8.91585	0.0402141		0.42559	1.34312	0.128115
gi|118496615|ref|NC_008601.1|	RefSeq	gene	244745	245713	.	+	.	ID=gene221;Name=FTN_0222;Dbxref=GeneID:4547822;gbkey=Gene;locus_tag=FTN_0222	2599	2749	0.697708	8.16939	0.0008456		0.697708	1.62193	0.210031
gi|118496615|ref|NC_008601.1|	RefSeq	gene	246583	248121	.	+	.	ID=gene222;Name=FTN_0223;Dbxref=GeneID:4547823;gbkey=Gene;locus_tag=FTN_0223	960	635	0.0205085	6.89828	0.93211		0.0205085	1.01432	0.00617368
gi|118496615|ref|NC_008601.1|	RefSeq	gene	248314	248389	.	-	.	ID=gene223;Name=FTN_0224;Dbxref=GeneID:4547824;gbkey=Gene;locus_tag=FTN_0224	176	127	0.145923	9.75087	0.60861		0.145923	1.10644	0.0439273
gi|118496615|ref|NC_008601.1|	RefSeq	gene	248452	249375	.	-	.	ID=gene224;Name=FTN_0225;Dbxref=GeneID:4547825;gbkey=Gene;locus_tag=FTN_0225	2730	1549	-0.200762	10.8169	0.339524		-0.200762	0.870091	-0.0604355
gi|118496615|ref|NC_008601.1|	RefSeq	gene	249457	249999	.	-	.	ID=gene225;Name=folA;Dbxref=GeneID:4547826;gbkey=Gene;gene=folA;locus_tag=FTN_0226	1072	978	0.484333	7.72481	0.024281		0.484333	1.39894	0.145799
gi|118496615|ref|NC_008601.1|	RefSeq	gene	250191	250910	.	+	.	ID=gene226;Name=rpsB;Dbxref=GeneID:4547827;gbkey=Gene;gene=rpsB;locus_tag=FTN_0227	14596	11534	0.277107	11.367	0.177106		0.277107	1.21176	0.0834175
gi|118496615|ref|NC_008601.1|	RefSeq	gene	250932	251801	.	+	.	ID=gene227;Name=tsf;Dbxref=GeneID:4547828;gbkey=Gene;gene=tsf;locus_tag=FTN_0228	10751	8418	0.263865	11.4443	0.199386		0.263865	1.20069	0.0794312
gi|118496615|ref|NC_008601.1|	RefSeq	gene	251805	252554	.	+	.	ID=gene228;Name=pyrH;Dbxref=GeneID:4547829;gbkey=Gene;gene=pyrH;locus_tag=FTN_0229	5099	3283	-0.0184095	10.2037	0.930478		-0.0184095	0.987321	-0.00554181
gi|118496615|ref|NC_008601.1|	RefSeq	gene	252583	253140	.	+	.	ID=gene229;Name=frr;Dbxref=GeneID:4547830;gbkey=Gene;gene=frr;locus_tag=FTN_0230	1481	825	-0.227291	8.81146	0.290477		-0.227291	0.854237	-0.0684214
gi|118496615|ref|NC_008601.1|	RefSeq	gene	253173	253946	.	+	.	ID=gene230;Name=uppS;Dbxref=GeneID:4547831;gbkey=Gene;gene=uppS;locus_tag=FTN_0231	1867	1201	-0.0196946	9.01188	0.929448		-0.0196946	0.986441	-0.00592867
gi|118496615|ref|NC_008601.1|	RefSeq	gene	253960	254754	.	+	.	ID=gene231;Name=cdsA;Dbxref=GeneID:4547832;gbkey=Gene;gene=cdsA;locus_tag=FTN_0232	7307	5180	0.12046	9.41884	0.559432		0.12046	1.08708	0.0362621
gi|118496615|ref|NC_008601.1|	RefSeq	gene	254764	255210	.	+	.	ID=gene232;Name=dut;Dbxref=GeneID:4548386;gbkey=Gene;gene=dut;locus_tag=FTN_0233	1391	892	-0.0242146	7.61185	0.91468		-0.0242146	0.983356	-0.00728932
gi|118496615|ref|NC_008601.1|	RefSeq	gene	255214	255810	.	+	.	ID=gene233;Name=pgsA;Dbxref=GeneID:4548387;gbkey=Gene;gene=pgsA;locus_tag=FTN_0234	529	426	0.304297	7.20986	0.18081		0.304297	1.23482	0.0916025
gi|118496615|ref|NC_008601.1|	RefSeq	gene	255945	256319	.	+	.	ID=gene234;Name=rpsL;Dbxref=GeneID:4548388;gbkey=Gene;gene=rpsL;locus_tag=FTN_0235	6394	6504	0.641386	10.2729	0.00191673		0.641386	1.55983	0.193076
gi|118496615|ref|NC_008601.1|	RefSeq	gene	256358	256831	.	+	.	ID=gene235;Name=rpsG;Dbxref=GeneID:4548389;gbkey=Gene;gene=rpsG;locus_tag=FTN_0236	13393	12278	0.491381	11.2633	0.0168489		0.491381	1.40579	0.147921
gi|118496615|ref|NC_008601.1|	RefSeq	gene	256846	258960	.	+	.	ID=gene236;Name=fusA;Dbxref=GeneID:4548390;gbkey=Gene;gene=fusA;locus_tag=FTN_0237	66491	63386	0.547794	13.4662	0.00755225		0.547794	1.46185	0.164902
gi|118496615|ref|NC_008601.1|	RefSeq	gene	258981	259298	.	+	.	ID=gene237;Name=rpsJ;Dbxref=GeneID:4548391;gbkey=Gene;gene=rpsJ;gene_synonym=nusE;locus_tag=FTN_0238	12822	10184	0.28447	10.4476	0.166128		0.28447	1.21796	0.0856339
gi|118496615|ref|NC_008601.1|	RefSeq	gene	259402	260034	.	+	.	ID=gene238;Name=rplC;Dbxref=GeneID:4548392;gbkey=Gene;gene=rplC;locus_tag=FTN_0239	54010	67382	0.935924	12.674	5.65894e-06		0.935924	1.91312	0.281741
gi|118496615|ref|NC_008601.1|	RefSeq	gene	260067	260690	.	+	.	ID=gene239;Name=rplD;Dbxref=GeneID:4548393;gbkey=Gene;gene=rplD;locus_tag=FTN_0240	27539	27733	0.626914	11.9079	0.00227802		0.626914	1.54426	0.18872
gi|118496615|ref|NC_008601.1|	RefSeq	gene	260687	260986	.	+	.	ID=gene240;Name=rplW;Dbxref=GeneID:4548394;gbkey=Gene;gene=rplW;locus_tag=FTN_0241	15925	15890	0.613611	11.082	0.00285362		0.613611	1.53008	0.184715
gi|118496615|ref|NC_008601.1|	RefSeq	gene	261008	261832	.	+	.	ID=gene241;Name=rplB;Dbxref=GeneID:4548395;gbkey=Gene;gene=rplB;locus_tag=FTN_0242	67009	76183	0.801902	12.9314	9.69948e-05		0.801902	1.7434	0.241397
gi|118496615|ref|NC_008601.1|	RefSeq	gene	261847	262125	.	+	.	ID=gene242;Name=rpsS;Dbxref=GeneID:4548396;gbkey=Gene;gene=rpsS;locus_tag=FTN_0243	33681	38748	0.818974	11.8413	6.97095e-05		0.818974	1.76415	0.246536
gi|118496615|ref|NC_008601.1|	RefSeq	gene	262141	262476	.	+	.	ID=gene243;Name=rplV;Dbxref=GeneID:4548397;gbkey=Gene;gene=rplV;locus_tag=FTN_0244	26102	24639	0.53357	11.3644	0.00934183		0.53357	1.44751	0.160621
gi|118496615|ref|NC_008601.1|	RefSeq	gene	262491	263162	.	+	.	ID=gene244;Name=rpsC;Dbxref=GeneID:4548398;gbkey=Gene;gene=rpsC;locus_tag=FTN_0245	30551	24405	0.292745	11.8825	0.153019		0.292745	1.22497	0.0881251
gi|118496615|ref|NC_008601.1|	RefSeq	gene	263162	263575	.	+	.	ID=gene245;Name=rplP;Dbxref=GeneID:4548399;gbkey=Gene;gene=rplP;locus_tag=FTN_0246	25580	22675	0.442874	11.4623	0.0308485		0.442874	1.35931	0.133318
gi|118496615|ref|NC_008601.1|	RefSeq	gene	263575	263775	.	+	.	ID=gene246;Name=rpmC;Dbxref=GeneID:4548400;gbkey=Gene;gene=rpmC;locus_tag=FTN_0247	16708	14931	0.454558	10.7033	0.02688		0.454558	1.37036	0.136836
gi|118496615|ref|NC_008601.1|	RefSeq	gene	263788	264039	.	+	.	ID=gene247;Name=rpsQ;Dbxref=GeneID:4548401;gbkey=Gene;gene=rpsQ;locus_tag=FTN_0248	17267	14264	0.341148	10.749	0.096444		0.341148	1.26676	0.102696
gi|118496615|ref|NC_008601.1|	RefSeq	gene	264131	264499	.	+	.	ID=gene248;Name=rplN;Dbxref=GeneID:4548402;gbkey=Gene;gene=rplN;locus_tag=FTN_0249	37884	32871	0.412015	11.9392	0.0443815		0.412015	1.33054	0.124029
gi|118496615|ref|NC_008601.1|	RefSeq	gene	264521	264838	.	+	.	ID=gene249;Name=rplX;Dbxref=GeneID:4548403;gbkey=Gene;gene=rplX;locus_tag=FTN_0250	56116	55144	0.59158	12.4116	0.00393632		0.59158	1.5069	0.178083
gi|118496615|ref|NC_008601.1|	RefSeq	gene	264850	265389	.	+	.	ID=gene250;Name=rplE;Dbxref=GeneID:4548404;gbkey=Gene;gene=rplE;locus_tag=FTN_0251	58829	53503	0.479881	12.5329	0.0192035		0.479881	1.39463	0.144459
gi|118496615|ref|NC_008601.1|	RefSeq	gene	265408	265713	.	+	.	ID=gene251;Name=rpsN;Dbxref=GeneID:4547435;gbkey=Gene;gene=rpsN;locus_tag=FTN_0252	33340	33476	0.62266	11.8156	0.00243127		0.62266	1.53971	0.187439
gi|118496615|ref|NC_008601.1|	RefSeq	gene	265730	266128	.	+	.	ID=gene252;Name=rpsH;Dbxref=GeneID:4547436;gbkey=Gene;gene=rpsH;locus_tag=FTN_0253	45711	46372	0.6375	12.2398	0.00190443		0.6375	1.55563	0.191907
gi|118496615|ref|NC_008601.1|	RefSeq	gene	266147	266683	.	+	.	ID=gene253;Name=rplF;Dbxref=GeneID:4547437;gbkey=Gene;gene=rplF;locus_tag=FTN_0254	89620	103891	0.829967	13.1793	5.49907e-05		0.829967	1.77764	0.249845
gi|118496615|ref|NC_008601.1|	RefSeq	gene	266706	267059	.	+	.	ID=gene254;Name=rplR;Dbxref=GeneID:4547438;gbkey=Gene;gene=rplR;locus_tag=FTN_0255	39379	41000	0.674985	12.034	0.00101901		0.674985	1.59658	0.203191
gi|118496615|ref|NC_008601.1|	RefSeq	gene	267087	267587	.	+	.	ID=gene255;Name=rpsE;Dbxref=GeneID:4547439;gbkey=Gene;gene=rpsE;locus_tag=FTN_0256	80918	89803	0.767091	12.9976	0.000190604		0.767091	1.70184	0.230918
gi|118496615|ref|NC_008601.1|	RefSeq	gene	267594	267779	.	+	.	ID=gene256;Name=rpmD;Dbxref=GeneID:4547440;gbkey=Gene;gene=rpmD;locus_tag=FTN_0257	41703	47712	0.810988	11.9803	8.14852e-05		0.810988	1.75441	0.244132
gi|118496615|ref|NC_008601.1|	RefSeq	gene	267786	268217	.	+	.	ID=gene257;Name=rplO;Dbxref=GeneID:4547441;gbkey=Gene;gene=rplO;locus_tag=FTN_0258	21551	17449	0.312177	11.2953	0.127906		0.312177	1.24158	0.0939747
gi|118496615|ref|NC_008601.1|	RefSeq	gene	268228	269553	.	+	.	ID=gene258;Name=secY;Dbxref=GeneID:4547442;gbkey=Gene;gene=secY;locus_tag=FTN_0259	47870	35981	0.204902	12.3234	0.316715		0.204902	1.15261	0.0616818
gi|118496615|ref|NC_008601.1|	RefSeq	gene	269577	269690	.	+	.	ID=gene259;Name=rpmJ;Dbxref=GeneID:4547443;gbkey=Gene;gene=rpmJ;locus_tag=FTN_0260	10890	6157	-0.205912	9.62427	0.317136		-0.205912	0.866991	-0.0619856
gi|118496615|ref|NC_008601.1|	RefSeq	gene	269807	270163	.	+	.	ID=gene260;Name=rpsM;Dbxref=GeneID:4547444;gbkey=Gene;gene=rpsM;locus_tag=FTN_0261	35110	23473	0.0359096	11.5162	0.860897		0.0359096	1.0252	0.0108099
gi|118496615|ref|NC_008601.1|	RefSeq	gene	270202	270591	.	+	.	ID=gene261;Name=rpsK;Dbxref=GeneID:4547445;gbkey=Gene;gene=rpsK;locus_tag=FTN_0262	15965	12506	0.264495	11.1141	0.197469		0.264495	1.20122	0.079621
gi|118496615|ref|NC_008601.1|	RefSeq	gene	270613	271233	.	+	.	ID=gene262;Name=rpsD;Dbxref=GeneID:4547446;gbkey=Gene;gene=rpsD;locus_tag=FTN_0263	10499	7311	0.094677	11.135	0.645531		0.094677	1.06783	0.0285006
gi|118496615|ref|NC_008601.1|	RefSeq	gene	271291	272262	.	+	.	ID=gene263;Name=rpoA;Dbxref=GeneID:4547447;gbkey=Gene;gene=rpoA;locus_tag=FTN_0264	13057	7253	-0.231381	11.1214	0.26045		-0.231381	0.851819	-0.0696527
gi|118496615|ref|NC_008601.1|	RefSeq	gene	272307	272744	.	+	.	ID=gene264;Name=rplQ;Dbxref=GeneID:4547448;gbkey=Gene;gene=rplQ;locus_tag=FTN_0265	3183	2147	0.0487223	9.63646	0.816989		0.0487223	1.03435	0.0146669
gi|118496615|ref|NC_008601.1|	RefSeq	gene	272930	274816	.	+	.	ID=gene265;Name=htpG;Dbxref=GeneID:4547449;gbkey=Gene;gene=htpG;locus_tag=FTN_0266	99940	73458	0.172647	12.8546	0.398499		0.172647	1.12712	0.0519718
gi|118496615|ref|NC_008601.1|	RefSeq	gene	274900	275403	.	+	.	ID=gene266;Name=FTN_0267;Dbxref=GeneID:4547450;gbkey=Gene;locus_tag=FTN_0267	10106	7420	0.171066	9.59175	0.405676		0.171066	1.12589	0.051496
gi|118496615|ref|NC_008601.1|	RefSeq	gene	275553	275780	.	-	.	ID=gene267;Name=FTN_0268;Note=gene fragment;Dbxref=GeneID:4547451;gbkey=Gene;locus_tag=FTN_0268;pseudo=true	1021	1202	0.852148	7.64938	7.33715e-05		0.852148	1.80519	0.256522
gi|118496615|ref|NC_008601.1|	RefSeq	gene	275911	277422	.	-	.	ID=gene268;Name=FTN_0269;Dbxref=GeneID:4547452;gbkey=Gene;locus_tag=FTN_0269	1654	1353	0.326965	8.7988	0.122679		0.326965	1.25437	0.0984264
gi|118496615|ref|NC_008601.1|	RefSeq	gene	277740	279380	.	+	.	ID=gene269;Name=pyrG;Dbxref=GeneID:4547453;gbkey=Gene;gene=pyrG;locus_tag=FTN_0270	11055	10394	0.527835	10.2539	0.0103345		0.527835	1.44176	0.158894
gi|118496615|ref|NC_008601.1|	RefSeq	gene	279453	279875	.	+	.	ID=gene270;Name=ndk;Dbxref=GeneID:4547454;gbkey=Gene;gene=ndk;locus_tag=FTN_0271	22376	22684	0.636509	10.9835	0.00195862		0.636509	1.55456	0.191608
gi|118496615|ref|NC_008601.1|	RefSeq	gene	279916	280818	.	+	.	ID=gene271;Name=accD;Dbxref=GeneID:4548368;gbkey=Gene;gene=accD;locus_tag=FTN_0272	9822	7803	0.284798	10.6913	0.166256		0.284798	1.21824	0.0857326
gi|118496615|ref|NC_008601.1|	RefSeq	gene	280833	282014	.	+	.	ID=gene272;Name=folC;Dbxref=GeneID:4548369;gbkey=Gene;gene=folC;locus_tag=FTN_0273	4638	3882	0.360076	9.48157	0.0821208		0.360076	1.28349	0.108394
gi|118496615|ref|NC_008601.1|	RefSeq	gene	281992	282402	.	+	.	ID=gene273;Name=FTN_0274;Dbxref=GeneID:4548370;gbkey=Gene;locus_tag=FTN_0274	742	581	0.263859	7.06369	0.229632		0.263859	1.20069	0.0794296
gi|118496615|ref|NC_008601.1|	RefSeq	gene	282485	283543	.	+	.	ID=gene274;Name=FTN_0275;Dbxref=GeneID:4548371;gbkey=Gene;locus_tag=FTN_0275	1802	962	-0.288674	8.49047	0.175704		-0.288674	0.818654	-0.0868995
gi|118496615|ref|NC_008601.1|	RefSeq	gene	283566	285107	.	+	.	ID=gene275;Name=mviN;Dbxref=GeneID:4548372;gbkey=Gene;gene=mviN;locus_tag=FTN_0276	1528	710	-0.488906	7.91913	0.023401		-0.488906	0.712565	-0.147175
gi|118496615|ref|NC_008601.1|	RefSeq	gene	285160	286665	.	+	.	ID=gene276;Name=gshA;Dbxref=GeneID:4548373;gbkey=Gene;gene=gshA;locus_tag=FTN_0277	4128	1708	-0.656315	8.41337	0.00171453		-0.656315	0.634497	-0.19757
gi|118496615|ref|NC_008601.1|	RefSeq	gene	286878	287093	.	-	.	ID=gene277;Name=rpmE;Dbxref=GeneID:4548374;gbkey=Gene;gene=rpmE;locus_tag=FTN_0278	922	582	-0.0469502	7.68678	0.835321		-0.0469502	0.96798	-0.0141334
gi|118496615|ref|NC_008601.1|	RefSeq	gene	287215	287946	.	-	.	ID=gene278;Name=FTN_0279;Dbxref=GeneID:4548375;gbkey=Gene;locus_tag=FTN_0279	5545	1771	-1.02979	8.5407	9.23247e-07		-1.02979	0.489781	-0.309998
gi|118496615|ref|NC_008601.1|	RefSeq	gene	288029	288424	.	+	.	ID=gene279;Name=FTN_0280;Dbxref=GeneID:4548376;gbkey=Gene;locus_tag=FTN_0280	1592	801	-0.374136	6.64753	0.0811503		-0.374136	0.771567	-0.112626
gi|118496615|ref|NC_008601.1|	RefSeq	gene	288433	288882	.	+	.	ID=gene280;Name=FTN_0281;Dbxref=GeneID:4548377;gbkey=Gene;locus_tag=FTN_0281	2410	1110	-0.501646	7.16547	0.0177441		-0.501646	0.7063	-0.151011
gi|118496615|ref|NC_008601.1|	RefSeq	gene	288913	289809	.	+	.	ID=gene281;Name=FTN_0282;Dbxref=GeneID:4548378;gbkey=Gene;locus_tag=FTN_0282	4200	2563	-0.0957627	8.22289	0.645979		-0.0957627	0.935777	-0.0288275
gi|118496615|ref|NC_008601.1|	RefSeq	gene	289901	291434	.	+	.	ID=gene282;Name=FTN_0283;Note=frameshift;Dbxref=GeneID:4548379;gbkey=Gene;locus_tag=FTN_0283;pseudo=true	1459	958	0.00990621	7.35665	0.967303		0.00990621	1.00689	0.00298207
gi|118496615|ref|NC_008601.1|	RefSeq	gene	291793	292797	.	+	.	ID=gene283;Name=FTN_0284;Dbxref=GeneID:4548380;gbkey=Gene;locus_tag=FTN_0284	719	513	0.129731	6.19918	0.560605		0.129731	1.09409	0.0390528
gi|118496615|ref|NC_008601.1|	RefSeq	gene	292790	294010	.	+	.	ID=gene284;Name=FTN_0285;Dbxref=GeneID:4548381;gbkey=Gene;locus_tag=FTN_0285	529	432	0.32447	6.14895	0.151035		0.32447	1.2522	0.0976752
gi|118496615|ref|NC_008601.1|	RefSeq	gene	294223	294786	.	+	.	ID=gene285;Name=FTN_0286;Dbxref=GeneID:4548382;gbkey=Gene;locus_tag=FTN_0286	227	155	0.0663223	5.44664	0.807742		0.0663223	1.04704	0.019965
gi|118496615|ref|NC_008601.1|	RefSeq	gene	294845	295612	.	+	.	ID=gene286;Name=FTN_0287;Dbxref=GeneID:4548383;gbkey=Gene;locus_tag=FTN_0287	378	264	0.098903	7.97708	0.682452		0.098903	1.07096	0.0297728
gi|118496615|ref|NC_008601.1|	RefSeq	gene	295763	295839	.	+	.	ID=gene287;Name=FTN_0288;Dbxref=GeneID:4548384;gbkey=Gene;locus_tag=FTN_0288	82	55	0.0405235	4.75454	0.946789		0.0405235	1.02849	0.0121988
gi|118496615|ref|NC_008601.1|	RefSeq	gene	296016	296717	.	+	.	ID=gene288;Name=proQ;Dbxref=GeneID:4548385;gbkey=Gene;gene=proQ;locus_tag=FTN_0289	9661	7204	0.193412	9.57782	0.347244		0.193412	1.14347	0.0582229
gi|118496615|ref|NC_008601.1|	RefSeq	gene	296739	297284	.	+	.	ID=gene289;Name=FTN_0290;Dbxref=GeneID:4547681;gbkey=Gene;locus_tag=FTN_0290	4912	1699	-0.914796	8.33688	1.28907e-05		-0.914796	0.530419	-0.275381
gi|118496615|ref|NC_008601.1|	RefSeq	gene	297299	298753	.	-	.	ID=gene290;Name=trkH;Dbxref=GeneID:4547682;gbkey=Gene;gene=trkH;locus_tag=FTN_0291	1536	792	-0.338779	7.95389	0.114715		-0.338779	0.79071	-0.101983
gi|118496615|ref|NC_008601.1|	RefSeq	gene	298865	299068	.	+	.	ID=gene291;Name=FTN_0292;Dbxref=GeneID:4547683;gbkey=Gene;locus_tag=FTN_0292	93	65	0.0998416	4.49979	0.80971		0.0998416	1.07166	0.0300553
gi|118496615|ref|NC_008601.1|	RefSeq	gene	299467	300084	.	-	.	ID=gene292;Name=lolA;Dbxref=GeneID:4547684;gbkey=Gene;gene=lolA;locus_tag=FTN_0293	1157	547	-0.463915	6.82696	0.0336729		-0.463915	0.725016	-0.139652
gi|118496615|ref|NC_008601.1|	RefSeq	gene	300085	302586	.	-	.	ID=gene293;Name=ftsK;Dbxref=GeneID:4547685;gbkey=Gene;gene=ftsK;locus_tag=FTN_0294	6462	3934	-0.0991918	9.02225	0.631798		-0.0991918	0.933556	-0.0298597
gi|118496615|ref|NC_008601.1|	RefSeq	gene	302708	303376	.	+	.	ID=gene294;Name=FTN_0295;Dbxref=GeneID:4547686;gbkey=Gene;locus_tag=FTN_0295	406	333	0.330722	5.60704	0.157776		0.330722	1.25764	0.0995572
gi|118496615|ref|NC_008601.1|	RefSeq	gene	303623	305077	.	+	.	ID=gene295;Name=lysP;Dbxref=GeneID:4547687;gbkey=Gene;gene=lysP;locus_tag=FTN_0296	3530	1992	-0.208651	8.67784	0.317844		-0.208651	0.865346	-0.0628103
gi|118496615|ref|NC_008601.1|	RefSeq	gene	305086	305724	.	+	.	ID=gene296;Name=FTN_0297;Dbxref=GeneID:4547688;gbkey=Gene;locus_tag=FTN_0297	1919	1145	-0.128207	7.37085	0.547188		-0.128207	0.914968	-0.0385941
gi|118496615|ref|NC_008601.1|	RefSeq	gene	305744	306730	.	+	.	ID=gene297;Name=glpX;Dbxref=GeneID:4547689;gbkey=Gene;gene=glpX;locus_tag=FTN_0298	5272	2477	-0.472951	8.54567	0.0228742		-0.472951	0.720489	-0.142372
gi|118496615|ref|NC_008601.1|	RefSeq	gene	306996	308504	.	+	.	ID=gene298;Name=putP;Dbxref=GeneID:4547690;gbkey=Gene;gene=putP;locus_tag=FTN_0299	1581	1185	0.200821	7.55929	0.345424		0.200821	1.14935	0.0604532
gi|118496615|ref|NC_008601.1|	RefSeq	gene	308570	310249	.	+	.	ID=gene299;Name=FTN_0300;Dbxref=GeneID:4547691;gbkey=Gene;locus_tag=FTN_0300	1775	986	-0.231349	7.42149	0.278038		-0.231349	0.851838	-0.0696428
gi|118496615|ref|NC_008601.1|	RefSeq	gene	310260	311567	.	+	.	ID=gene300;Name=FTN_0301;Dbxref=GeneID:4547692;gbkey=Gene;locus_tag=FTN_0301	362	264	0.161274	5.95723	0.511885		0.161274	1.11827	0.0485483
gi|118496615|ref|NC_008601.1|	RefSeq	gene	311638	311985	.	+	.	ID=gene301;Name=FTN_0302;Dbxref=GeneID:4547693;gbkey=Gene;locus_tag=FTN_0302	140	110	0.268601	4.9463	0.352205		0.268601	1.20464	0.0808571
gi|118496615|ref|NC_008601.1|	RefSeq	gene	311969	312895	.	+	.	ID=gene302;Name=FTN_0303;Dbxref=GeneID:4547694;gbkey=Gene;locus_tag=FTN_0303	304	252	0.345989	6.07524	0.155691		0.345989	1.27102	0.104153
gi|118496615|ref|NC_008601.1|	RefSeq	gene	312892	314298	.	+	.	ID=gene303;Name=FTN_0304;Dbxref=GeneID:4547695;gbkey=Gene;locus_tag=FTN_0304	630	366	-0.166676	6.13759	0.4708		-0.166676	0.890893	-0.0501745
gi|118496615|ref|NC_008601.1|	RefSeq	gene	314309	314929	.	+	.	ID=gene304;Name=FTN_0305;Dbxref=GeneID:4547696;gbkey=Gene;locus_tag=FTN_0305	590	403	0.0668377	5.68959	0.771553		0.0668377	1.04742	0.0201202
gi|118496615|ref|NC_008601.1|	RefSeq	gene	315040	315717	.	+	.	ID=gene305;Name=FTN_0306;Dbxref=GeneID:4547697;gbkey=Gene;locus_tag=FTN_0306	4429	2393	-0.271361	8.30041	0.192047		-0.271361	0.828538	-0.0816878
gi|118496615|ref|NC_008601.1|	RefSeq	gene	315736	316656	.	+	.	ID=gene306;Name=FTN_0307;Dbxref=GeneID:4547698;gbkey=Gene;locus_tag=FTN_0307	3861	2020	-0.317816	8.18972	0.127621		-0.317816	0.802284	-0.0956721
gi|118496615|ref|NC_008601.1|	RefSeq	gene	316669	318477	.	+	.	ID=gene307;Name=FTN_0308;Dbxref=GeneID:4547699;gbkey=Gene;locus_tag=FTN_0308	3618	1691	-0.480502	8.00617	0.0216718		-0.480502	0.716728	-0.144646
gi|118496615|ref|NC_008601.1|	RefSeq	gene	318501	320306	.	+	.	ID=gene308;Name=FTN_0309;Dbxref=GeneID:4547700;gbkey=Gene;locus_tag=FTN_0309	4218	2544	-0.112667	8.21333	0.588655		-0.112667	0.924877	-0.033916
gi|118496615|ref|NC_008601.1|	RefSeq	gene	320389	321768	.	+	.	ID=gene309;Name=cysS;Dbxref=GeneID:4548405;gbkey=Gene;gene=cysS;locus_tag=FTN_0310	4599	3278	0.128281	8.83626	0.536524		0.128281	1.09299	0.0386165
gi|118496615|ref|NC_008601.1|	RefSeq	gene	321772	322716	.	+	.	ID=gene310;Name=FTN_0311;Dbxref=GeneID:4548406;gbkey=Gene;locus_tag=FTN_0311	2532	1897	0.200221	8.06057	0.33964		0.200221	1.14887	0.0602724
gi|118496615|ref|NC_008601.1|	RefSeq	gene	322772	323962	.	+	.	ID=gene311;Name=FTN_0312;Dbxref=GeneID:4548407;gbkey=Gene;locus_tag=FTN_0312	894	533	-0.129327	6.74417	0.56665		-0.129327	0.914258	-0.0389313
gi|118496615|ref|NC_008601.1|	RefSeq	gene	323976	324467	.	+	.	ID=gene312;Name=FTN_0313;Dbxref=GeneID:4548408;gbkey=Gene;locus_tag=FTN_0313	175	117	0.0359125	4.5807	0.90952		0.0359125	1.02521	0.0108107
gi|118496615|ref|NC_008601.1|	RefSeq	gene	324491	324814	.	-	.	ID=gene313;Name=FTN_0314;Dbxref=GeneID:4548409;gbkey=Gene;locus_tag=FTN_0314	133	83	-0.0633797	4.24784	0.885197		-0.0633797	0.95702	-0.0190792
gi|118496615|ref|NC_008601.1|	RefSeq	gene	324845	325591	.	-	.	ID=gene314;Name=FTN_0315;Dbxref=GeneID:4548410;gbkey=Gene;locus_tag=FTN_0315	376	261	0.0900716	5.81966	0.708955		0.0900716	1.06442	0.0271142
gi|118496615|ref|NC_008601.1|	RefSeq	gene	325736	326791	.	-	.	ID=gene315;Name=FTN_0316;Dbxref=GeneID:4548411;gbkey=Gene;locus_tag=FTN_0316	720	282	-0.735311	5.9746	0.00140109		-0.735311	0.600689	-0.221351
gi|118496615|ref|NC_008601.1|	RefSeq	gene	326808	328172	.	+	.	ID=gene316;Name=FTN_0317;Dbxref=GeneID:4548412;gbkey=Gene;locus_tag=FTN_0317	655	366	-0.222806	6.38589	0.325795		-0.222806	0.856897	-0.0670713
gi|118496615|ref|NC_008601.1|	RefSeq	gene	328174	328455	.	-	.	ID=gene317;Name=FTN_0318;Dbxref=GeneID:4548413;gbkey=Gene;locus_tag=FTN_0318	560	167	-1.12833	5.35082	2.98376e-06		-1.12833	0.457446	-0.33966
gi|118496615|ref|NC_008601.1|	RefSeq	gene	328468	329970	.	-	.	ID=gene318;Name=FTN_0319;Dbxref=GeneID:4548414;gbkey=Gene;locus_tag=FTN_0319	1175	458	-0.742327	6.8726	0.00076586		-0.742327	0.597775	-0.223463
gi|118496615|ref|NC_008601.1|	RefSeq	gene	330336	331079	.	-	.	ID=gene319;Name=FTN_0320;Dbxref=GeneID:4548415;gbkey=Gene;locus_tag=FTN_0320	319	207	-0.00713271	5.52049	0.9814		-0.00713271	0.995068	-0.00214716
gi|118496615|ref|NC_008601.1|	RefSeq	gene	331082	331777	.	-	.	ID=gene320;Name=ubiG;Dbxref=GeneID:4548416;gbkey=Gene;gene=ubiG;locus_tag=FTN_0321	765	392	-0.347739	6.25472	0.122545		-0.347739	0.785815	-0.10468
gi|118496615|ref|NC_008601.1|	RefSeq	gene	331919	333019	.	+	.	ID=gene321;Name=FTN_0322;Dbxref=GeneID:4548417;gbkey=Gene;locus_tag=FTN_0322	3844	2095	-0.258857	8.79331	0.2145		-0.258857	0.83575	-0.0779238
gi|118496615|ref|NC_008601.1|	RefSeq	gene	333238	333474	.	-	.	ID=gene322;Name=FTN_0323;Dbxref=GeneID:4548418;gbkey=Gene;locus_tag=FTN_0323	980	638	-0.00243539	6.56704	1		-0.00243539	0.998313	-0.000733125
gi|118496615|ref|NC_008601.1|	RefSeq	gene	333491	333784	.	-	.	ID=gene323;Name=FTN_0324;Dbxref=GeneID:4548419;gbkey=Gene;locus_tag=FTN_0324	1171	624	-0.291292	6.70275	0.182844		-0.291292	0.81717	-0.0876876
gi|118496615|ref|NC_008601.1|	RefSeq	gene	333784	334446	.	-	.	ID=gene324;Name=FTN_0325;Dbxref=GeneID:4548420;gbkey=Gene;locus_tag=FTN_0325	1981	1224	-0.0778297	7.70328	0.715539		-0.0778297	0.947482	-0.0234291
gi|118496615|ref|NC_008601.1|	RefSeq	gene	334521	335054	.	-	.	ID=gene325;Name=FTN_0326;Dbxref=GeneID:4548421;gbkey=Gene;locus_tag=FTN_0326	1272	537	-0.627222	6.81415	0.00406535		-0.627222	0.647422	-0.188813
gi|118496615|ref|NC_008601.1|	RefSeq	gene	335054	335818	.	-	.	ID=gene326;Name=FTN_0327;Dbxref=GeneID:4548422;gbkey=Gene;locus_tag=FTN_0327	3453	1835	-0.295266	8.1636	0.157822		-0.295266	0.814922	-0.088884
gi|118496615|ref|NC_008601.1|	RefSeq	gene	335822	336625	.	-	.	ID=gene327;Name=FTN_0328;Dbxref=GeneID:4548423;gbkey=Gene;locus_tag=FTN_0328	3112	1482	-0.453481	8.59375	0.0307495		-0.453481	0.730279	-0.136511
gi|118496615|ref|NC_008601.1|	RefSeq	gene	336639	336911	.	-	.	ID=gene328;Name=minE;Dbxref=GeneID:4548800;gbkey=Gene;gene=minE;locus_tag=FTN_0329	2160	2046	0.538533	8.36758	0.010271		0.538533	1.45249	0.162115
gi|118496615|ref|NC_008601.1|	RefSeq	gene	336914	337738	.	-	.	ID=gene329;Name=minD;Dbxref=GeneID:4548801;gbkey=Gene;gene=minD;locus_tag=FTN_0330	16157	15504	0.557266	10.8489	0.0067125		0.557266	1.47148	0.167754
gi|118496615|ref|NC_008601.1|	RefSeq	gene	337778	338464	.	-	.	ID=gene330;Name=minC;Dbxref=GeneID:4548802;gbkey=Gene;gene=minC;locus_tag=FTN_0331	36501	25035	0.0727997	11.5053	0.722197		0.0727997	1.05176	0.0219149
gi|118496615|ref|NC_008601.1|	RefSeq	gene	338499	338654	.	-	.	ID=gene331;Name=rpmG;Dbxref=GeneID:4548803;gbkey=Gene;gene=rpmG;locus_tag=FTN_0332	17195	9977	-0.16852	10.3154	0.411695		-0.16852	0.889755	-0.0507296
gi|118496615|ref|NC_008601.1|	RefSeq	gene	338681	338917	.	-	.	ID=gene332;Name=rpmB;Dbxref=GeneID:4548804;gbkey=Gene;gene=rpmB;locus_tag=FTN_0333	24845	11941	-0.440239	10.5232	0.032032		-0.440239	0.737012	-0.132525
gi|118496615|ref|NC_008601.1|	RefSeq	gene	339051	339395	.	-	.	ID=gene333;Name=FTN_0334;Dbxref=GeneID:4548805;gbkey=Gene;locus_tag=FTN_0334	878	338	-0.760236	5.71348	0.000745818		-0.760236	0.5904	-0.228854
gi|118496615|ref|NC_008601.1|	RefSeq	gene	339525	341564	.	+	.	ID=gene334;Name=recG;Dbxref=GeneID:4548806;gbkey=Gene;gene=recG;locus_tag=FTN_0335	2052	1125	-0.250296	7.22954	0.237951		-0.250296	0.840724	-0.0753466
gi|118496615|ref|NC_008601.1|	RefSeq	gene	341568	341765	.	+	.	ID=gene335;Name=FTN_0336;Dbxref=GeneID:4548807;gbkey=Gene;locus_tag=FTN_0336	175	115	0.011059	4.31582	1		0.011059	1.00769	0.00332908
gi|118496615|ref|NC_008601.1|	RefSeq	gene	342333	343847	.	+	.	ID=gene336;Name=fumA;Dbxref=GeneID:4548808;gbkey=Gene;gene=fumA;locus_tag=FTN_0337	16585	10604	-0.0284806	10.2515	0.889979		-0.0284806	0.980452	-0.00857352
gi|118496615|ref|NC_008601.1|	RefSeq	gene	344391	345038	.	+	.	ID=gene337;Name=FTN_0338;Dbxref=GeneID:4548809;gbkey=Gene;locus_tag=FTN_0338	1553	1160	0.195839	7.00981	0.35796		0.195839	1.14539	0.0589533
gi|118496615|ref|NC_008601.1|	RefSeq	gene	345056	345409	.	+	.	ID=gene338;Name=FTN_0339;Dbxref=GeneID:4548810;gbkey=Gene;locus_tag=FTN_0339	3192	3138	0.592151	8.16568	0.00446447		0.592151	1.50749	0.178255
gi|118496615|ref|NC_008601.1|	RefSeq	gene	345433	345768	.	-	.	ID=gene339;Name=FTN_0340;Dbxref=GeneID:4548811;gbkey=Gene;locus_tag=FTN_0340	8820	6916	0.265945	9.33413	0.196431		0.265945	1.20242	0.0800573
gi|118496615|ref|NC_008601.1|	RefSeq	gene	345945	346190	.	-	.	ID=gene340;Name=FTN_0341;Dbxref=GeneID:4548812;gbkey=Gene;locus_tag=FTN_0341	245	129	-0.308409	4.58778	0.255566		-0.308409	0.807532	-0.0928403
gi|118496615|ref|NC_008601.1|	RefSeq	gene	346272	347585	.	-	.	ID=gene341;Name=FTN_0342;Dbxref=GeneID:4548813;gbkey=Gene;locus_tag=FTN_0342	694	307	-0.559758	6.26582	0.014228		-0.559758	0.678416	-0.168504
gi|118496615|ref|NC_008601.1|	RefSeq	gene	347652	349238	.	-	.	ID=gene342;Name=FTN_0343;Dbxref=GeneID:4548814;gbkey=Gene;locus_tag=FTN_0343	5837	2742	-0.473194	8.37218	0.0226093		-0.473194	0.720368	-0.142446
gi|118496615|ref|NC_008601.1|	RefSeq	gene	349251	350966	.	-	.	ID=gene343;Name=FTN_0344;Dbxref=GeneID:4548815;gbkey=Gene;locus_tag=FTN_0344	2114	900	-0.615134	7.00648	0.0038775		-0.615134	0.652869	-0.185174
gi|118496615|ref|NC_008601.1|	RefSeq	gene	351041	352147	.	-	.	ID=gene344;Name=FTN_0345;Dbxref=GeneID:4548816;gbkey=Gene;locus_tag=FTN_0345	2812	1174	-0.643331	7.25496	0.00231485		-0.643331	0.640233	-0.193662
gi|118496615|ref|NC_008601.1|	RefSeq	gene	352147	353400	.	-	.	ID=gene345;Name=FTN_0346;Dbxref=GeneID:4548817;gbkey=Gene;locus_tag=FTN_0346	15830	5627	-0.875422	9.579	2.34351e-05		-0.875422	0.545094	-0.263528
gi|118496615|ref|NC_008601.1|	RefSeq	gene	353592	354056	.	+	.	ID=gene346;Name=fkpB;Dbxref=GeneID:4548818;gbkey=Gene;gene=fkpB;locus_tag=FTN_0347	2063	1479	0.136658	7.45829	0.517998		0.136658	1.09936	0.0411382
gi|118496615|ref|NC_008601.1|	RefSeq	gene	354037	354999	.	+	.	ID=gene347;Name=ispH;Dbxref=GeneID:4548819;gbkey=Gene;gene=ispH;locus_tag=FTN_0348	3722	2988	0.299881	8.62685	0.148983		0.299881	1.23104	0.0902731
gi|118496615|ref|NC_008601.1|	RefSeq	gene	355001	355363	.	+	.	ID=gene348;Name=aroH;Dbxref=GeneID:4548330;gbkey=Gene;gene=aroH;locus_tag=FTN_0349	590	517	0.426144	6.33333	0.0559149		0.426144	1.34364	0.128282
gi|118496615|ref|NC_008601.1|	RefSeq	gene	355372	356193	.	+	.	ID=gene349;Name=pssA;Dbxref=GeneID:4548331;gbkey=Gene;gene=pssA;locus_tag=FTN_0350	1810	1232	0.0617971	7.60572	0.773154		0.0617971	1.04377	0.0186028
gi|118496615|ref|NC_008601.1|	RefSeq	gene	356198	356422	.	-	.	ID=gene350;Name=FTN_0351;Dbxref=GeneID:4548332;gbkey=Gene;locus_tag=FTN_0351	472	498	0.693972	6.14609	0.00211894		0.693972	1.61773	0.208906
gi|118496615|ref|NC_008601.1|	RefSeq	gene	356574	357281	.	+	.	ID=gene351;Name=tolQ;Dbxref=GeneID:4548333;gbkey=Gene;gene=tolQ;locus_tag=FTN_0352	4283	1833	-0.607599	8.2312	0.00364387		-0.607599	0.656288	-0.182905
gi|118496615|ref|NC_008601.1|	RefSeq	gene	357297	357737	.	+	.	ID=gene352;Name=tolR;Dbxref=GeneID:4548334;gbkey=Gene;gene=tolR;locus_tag=FTN_0353	1103	427	-0.7522	6.78217	0.000668907		-0.7522	0.593698	-0.226435
gi|118496615|ref|NC_008601.1|	RefSeq	gene	357724	358635	.	+	.	ID=gene353;Name=tolA;Dbxref=GeneID:4548335;gbkey=Gene;gene=tolA;locus_tag=FTN_0354	1236	501	-0.685899	6.94996	0.00177473		-0.685899	0.621618	-0.206476
gi|118496615|ref|NC_008601.1|	RefSeq	gene	358647	359954	.	+	.	ID=gene354;Name=tolB;Dbxref=GeneID:4548336;gbkey=Gene;gene=tolB;locus_tag=FTN_0355	4886	2068	-0.623604	8.30925	0.00278815		-0.623604	0.649048	-0.187723
gi|118496615|ref|NC_008601.1|	RefSeq	gene	359964	360209	.	+	.	ID=gene355;Name=FTN_0356;Dbxref=GeneID:4548337;gbkey=Gene;locus_tag=FTN_0356	1392	734	-0.306481	6.59739	0.155442		-0.306481	0.808612	-0.0922598
gi|118496615|ref|NC_008601.1|	RefSeq	gene	360228	360851	.	+	.	ID=gene356;Name=pal;Dbxref=GeneID:4548338;gbkey=Gene;gene=pal;locus_tag=FTN_0357	2138	833	-0.743015	7.23984	0.000502217		-0.743015	0.597489	-0.22367
gi|118496615|ref|NC_008601.1|	RefSeq	gene	360958	362277	.	+	.	ID=gene357;Name=rimO;Dbxref=GeneID:4548339;gbkey=Gene;gene=rimO;locus_tag=FTN_0358	8766	9676	0.759271	9.84422	0.000236798		0.759271	1.69264	0.228563
gi|118496615|ref|NC_008601.1|	RefSeq	gene	362380	363102	.	+	.	ID=gene358;Name=FTN_0359;Dbxref=GeneID:4548340;gbkey=Gene;locus_tag=FTN_0359	1911	853	-0.546868	7.79854	0.0104301		-0.546868	0.684505	-0.164624
gi|118496615|ref|NC_008601.1|	RefSeq	gene	363126	363356	.	+	.	ID=gene359;Name=FTN_0360;Dbxref=GeneID:4548341;gbkey=Gene;locus_tag=FTN_0360	1050	581	-0.236953	6.66712	0.277125		-0.236953	0.848536	-0.0713298
gi|118496615|ref|NC_008601.1|	RefSeq	gene	363337	364836	.	+	.	ID=gene360;Name=FTN_0361;Dbxref=GeneID:4548342;gbkey=Gene;locus_tag=FTN_0361	2800	1791	-0.0278704	8.27532	0.896397		-0.0278704	0.980867	-0.00838983
gi|118496615|ref|NC_008601.1|	RefSeq	gene	364836	366365	.	+	.	ID=gene361;Name=FTN_0362;Dbxref=GeneID:4548343;gbkey=Gene;locus_tag=FTN_0362	1295	728	-0.214125	7.24478	0.322742		-0.214125	0.862069	-0.0644581
gi|118496615|ref|NC_008601.1|	RefSeq	gene	366625	367554	.	+	.	ID=gene362;Name=FTN_0363;Dbxref=GeneID:4548344;gbkey=Gene;locus_tag=FTN_0363	1306	767	-0.151048	7.15746	0.485874		-0.151048	0.900596	-0.0454701
gi|118496615|ref|NC_008601.1|	RefSeq	gene	367604	368227	.	+	.	ID=gene363;Name=FTN_0364;Dbxref=GeneID:4548345;gbkey=Gene;locus_tag=FTN_0364	381	248	-0.00266026	6.00459	1		-0.00266026	0.998158	-0.000800818
gi|118496615|ref|NC_008601.1|	RefSeq	gene	368251	369009	.	+	.	ID=gene364;Name=FTN_0365;Dbxref=GeneID:4548346;gbkey=Gene;locus_tag=FTN_0365	546	360	0.0158811	6.58751	0.954117		0.0158811	1.01107	0.0047807
gi|118496615|ref|NC_008601.1|	RefSeq	gene	369054	369143	.	-	.	ID=gene365;Name=FTN_0366;Dbxref=GeneID:4548347;gbkey=Gene;locus_tag=FTN_0366	66	48	0.157017	4.49258	0.705651		0.157017	1.11498	0.0472668
gi|118496615|ref|NC_008601.1|	RefSeq	gene	369322	370557	.	+	.	ID=gene366;Name=FTN_0367;Dbxref=GeneID:4548095;gbkey=Gene;locus_tag=FTN_0367	2371	1208	-0.35606	7.93765	0.0918825		-0.35606	0.781295	-0.107185
gi|118496615|ref|NC_008601.1|	RefSeq	gene	371729	372253	.	+	.	ID=gene367;Name=FTN_0368;Dbxref=GeneID:4548096;gbkey=Gene;locus_tag=FTN_0368	186	194	0.677104	4.93376	0.00849642		0.677104	1.59893	0.203829
gi|118496615|ref|NC_008601.1|	RefSeq	gene	372857	373087	.	+	.	ID=gene368;Name=FTN_0369;Dbxref=GeneID:4548097;gbkey=Gene;locus_tag=FTN_0369	231	180	0.25674	5.37255	0.320325		0.25674	1.19478	0.0772863
gi|118496615|ref|NC_008601.1|	RefSeq	gene	373090	373368	.	+	.	ID=gene369;Name=FTN_0370;Dbxref=GeneID:4548098;gbkey=Gene;locus_tag=FTN_0370	240	116	-0.431803	6.05345	0.105064		-0.431803	0.741335	-0.129986
gi|118496615|ref|NC_008601.1|	RefSeq	gene	373472	374329	.	+	.	ID=gene370;Name=FTN_0371;Dbxref=GeneID:4548099;gbkey=Gene;locus_tag=FTN_0371	1693	737	-0.582992	7.19016	0.00663985		-0.582992	0.667578	-0.175498
gi|118496615|ref|NC_008601.1|	RefSeq	gene	374491	374709	.	+	.	ID=gene371;Name=FTN_0372;Dbxref=GeneID:4548100;gbkey=Gene;locus_tag=FTN_0372	127	143	0.787253	4.4842	0.00401481		0.787253	1.72579	0.236987
gi|118496615|ref|NC_008601.1|	RefSeq	gene	374890	376086	.	+	.	ID=gene372;Name=FTN_0373;Dbxref=GeneID:4548101;gbkey=Gene;locus_tag=FTN_0373	461	419	0.478839	6.29223	0.036151		0.478839	1.39362	0.144145
gi|118496615|ref|NC_008601.1|	RefSeq	gene	376108	376317	.	+	.	ID=gene373;Name=FTN_0374;Dbxref=GeneID:4548102;gbkey=Gene;locus_tag=FTN_0374	178	150	0.369598	4.30044	0.162991		0.369598	1.29199	0.11126
gi|118496615|ref|NC_008601.1|	RefSeq	gene	376636	377253	.	+	.	ID=gene374;Name=FTN_0375;Dbxref=GeneID:4548103;gbkey=Gene;locus_tag=FTN_0375	390	303	0.252543	5.85666	0.28566		0.252543	1.19131	0.0760231
																	#NUM!
gi|118496615|ref|NC_008601.1|	RefSeq	gene	378265	379017	.	+	.	ID=gene375;Name=FTN_0377;Note=IS insertion;Dbxref=GeneID:4548104;gbkey=Gene;locus_tag=FTN_0377;pseudo=true	223	264	0.859844	5.68378	0.000456234		0.859844	1.81484	0.258839
gi|118496615|ref|NC_008601.1|	RefSeq	gene	379010	380464	.	+	.	ID=gene376;Name=FTN_0378;Dbxref=GeneID:4548105;gbkey=Gene;locus_tag=FTN_0378	587	545	0.509575	6.59245	0.0227279		0.509575	1.42363	0.153397
gi|118496615|ref|NC_008601.1|	RefSeq	gene	380755	381129	.	+	.	ID=gene377;Name=FTN_0379;Dbxref=GeneID:4548106;gbkey=Gene;locus_tag=FTN_0379	302	226	0.198471	5.02709	0.420299		0.198471	1.14748	0.0597457
gi|118496615|ref|NC_008601.1|	RefSeq	gene	381374	381619	.	+	.	ID=gene378;Name=FTN_0380;Dbxref=GeneID:4548107;gbkey=Gene;locus_tag=FTN_0380	288	284	0.596355	4.75832	0.0126299		0.596355	1.51189	0.179521
gi|118496615|ref|NC_008601.1|	RefSeq	gene	382197	383183	.	+	.	ID=gene379;Name=FTN_0381;Dbxref=GeneID:4548108;gbkey=Gene;locus_tag=FTN_0381	1049	537	-0.349174	6.32402	0.111366		-0.349174	0.785033	-0.105112
gi|118496615|ref|NC_008601.1|	RefSeq	gene	383357	384595	.	+	.	ID=gene380;Name=FTN_0382;Dbxref=GeneID:4548109;gbkey=Gene;locus_tag=FTN_0382	419	303	0.149106	5.91031	0.52835		0.149106	1.10888	0.0448854
gi|118496615|ref|NC_008601.1|	RefSeq	gene	384608	384997	.	-	.	ID=gene381;Name=FTN_0383;Dbxref=GeneID:4548110;gbkey=Gene;locus_tag=FTN_0383	204	89	-0.579373	4.45974	0.0388825		-0.579373	0.669254	-0.174409
gi|118496615|ref|NC_008601.1|	RefSeq	gene	385017	385376	.	-	.	ID=gene382;Name=FTN_0384;Dbxref=GeneID:4548111;gbkey=Gene;locus_tag=FTN_0384	265	104	-0.732075	4.53602	0.00645119		-0.732075	0.602038	-0.220376
gi|118496615|ref|NC_008601.1|	RefSeq	gene	385390	386244	.	-	.	ID=gene383;Name=ubiA;Dbxref=GeneID:4548112;gbkey=Gene;gene=ubiA;locus_tag=FTN_0385	366	181	-0.398874	5.50738	0.105533		-0.398874	0.75845	-0.120073	FPI
gi|118496615|ref|NC_008601.1|	RefSeq	gene	386247	386753	.	-	.	ID=gene384;Name=ubiC;Dbxref=GeneID:4548113;gbkey=Gene;gene=ubiC;locus_tag=FTN_0386	814	371	-0.516705	5.92846	0.0212332		-0.516705	0.698967	-0.155544
gi|118496615|ref|NC_008601.1|	RefSeq	gene	386852	387559	.	+	.	ID=gene385;Name=rph;Dbxref=GeneID:4547588;gbkey=Gene;gene=rph;locus_tag=FTN_0387	2304	1958	0.382008	8.17658	0.0684552		0.382008	1.30315	0.114996
gi|118496615|ref|NC_008601.1|	RefSeq	gene	387613	387936	.	-	.	ID=gene386;Name=FTN_0388;Dbxref=GeneID:4547589;gbkey=Gene;locus_tag=FTN_0388	1930	1022	-0.30039	7.29238	0.157736		-0.30039	0.812033	-0.0904264
gi|118496615|ref|NC_008601.1|	RefSeq	gene	388041	388991	.	-	.	ID=gene387;Name=FTN_0389;Dbxref=GeneID:4547590;gbkey=Gene;locus_tag=FTN_0389	3395	2391	0.110987	8.29075	0.595106		0.110987	1.07997	0.0334105
gi|118496615|ref|NC_008601.1|	RefSeq	gene	389096	390163	.	-	.	ID=gene388;Name=htpX;Dbxref=GeneID:4547591;gbkey=Gene;gene=htpX;locus_tag=FTN_0390	2261	1450	-0.0241169	7.91495	0.911683		-0.0241169	0.983422	-0.00725991
gi|118496615|ref|NC_008601.1|	RefSeq	gene	390167	390742	.	-	.	ID=gene389;Name=FTN_0391;Dbxref=GeneID:4547592;gbkey=Gene;locus_tag=FTN_0391	2166	822	-0.780961	7.48311	0.000256562		-0.780961	0.581979	-0.235093
gi|118496615|ref|NC_008601.1|	RefSeq	gene	390790	391710	.	-	.	ID=gene390;Name=FTN_0392;Dbxref=GeneID:4547593;gbkey=Gene;locus_tag=FTN_0392	1089	692	-0.0373652	6.62661	0.865473		-0.0373652	0.974433	-0.011248
gi|118496615|ref|NC_008601.1|	RefSeq	gene	391849	392904	.	+	.	ID=gene391;Name=FTN_0393;Dbxref=GeneID:4547594;gbkey=Gene;locus_tag=FTN_0393	1206	993	0.336388	7.30144	0.116731		0.336388	1.26259	0.101263
gi|118496615|ref|NC_008601.1|	RefSeq	gene	392906	395071	.	-	.	ID=gene392;Name=FTN_0394;Dbxref=GeneID:4547595;gbkey=Gene;locus_tag=FTN_0394	1301	1022	0.268535	8.2353	0.209767		0.268535	1.20458	0.0808372
gi|118496615|ref|NC_008601.1|	RefSeq	gene	395068	395433	.	-	.	ID=gene393;Name=FTN_0395;Dbxref=GeneID:4547596;gbkey=Gene;locus_tag=FTN_0395	173	153	0.439218	5.71173	0.101223		0.439218	1.35587	0.132218
gi|118496615|ref|NC_008601.1|	RefSeq	gene	395576	396229	.	+	.	ID=gene394;Name=FTN_0396;Dbxref=GeneID:4547597;gbkey=Gene;locus_tag=FTN_0396	268	253	0.533442	6.09963	0.0274981		0.533442	1.44738	0.160582
gi|118496615|ref|NC_008601.1|	RefSeq	gene	396549	397547	.	+	.	ID=gene395;Name=gpsA;Dbxref=GeneID:4547598;gbkey=Gene;gene=gpsA;locus_tag=FTN_0397	816	561	0.0762074	6.78556	0.740388		0.0762074	1.05424	0.0229407
gi|118496615|ref|NC_008601.1|	RefSeq	gene	397548	398084	.	-	.	ID=gene396;Name=FTN_0398;Dbxref=GeneID:4547599;gbkey=Gene;locus_tag=FTN_0398	519	272	-0.315236	5.86497	0.178415		-0.315236	0.80372	-0.0948954
gi|118496615|ref|NC_008601.1|	RefSeq	gene	398089	399459	.	-	.	ID=gene397;Name=radA;Dbxref=GeneID:4547600;gbkey=Gene;gene=radA;locus_tag=FTN_0399	2600	1623	-0.0630553	7.84801	0.765903		-0.0630553	0.957235	-0.0189815
gi|118496615|ref|NC_008601.1|	RefSeq	gene	399467	400237	.	-	.	ID=gene398;Name=FTN_0400;Dbxref=GeneID:4547601;gbkey=Gene;locus_tag=FTN_0400	12348	9058	0.169775	9.73729	0.408661		0.169775	1.12488	0.0511073
gi|118496615|ref|NC_008601.1|	RefSeq	gene	400234	400833	.	-	.	ID=gene399;Name=FTN_0401;Dbxref=GeneID:4547602;gbkey=Gene;locus_tag=FTN_0401	1674	860	-0.344066	6.98027	0.107812		-0.344066	0.787818	-0.103574
gi|118496615|ref|NC_008601.1|	RefSeq	gene	400836	401894	.	-	.	ID=gene400;Name=aroC;Dbxref=GeneID:4547603;gbkey=Gene;gene=aroC;locus_tag=FTN_0402	1720	794	-0.498356	7.51313	0.0200129		-0.498356	0.707913	-0.15002
gi|118496615|ref|NC_008601.1|	RefSeq	gene	402035	402688	.	-	.	ID=gene401;Name=FTN_0403;Dbxref=GeneID:4547604;gbkey=Gene;locus_tag=FTN_0403	304	159	-0.318078	5.21887	0.21353		-0.318078	0.802138	-0.095751
gi|118496615|ref|NC_008601.1|	RefSeq	gene	402707	403219	.	-	.	ID=gene402;Name=FTN_0404;Dbxref=GeneID:4547605;gbkey=Gene;locus_tag=FTN_0404	594	271	-0.515223	5.71722	0.025924		-0.515223	0.699685	-0.155098
gi|118496615|ref|NC_008601.1|	RefSeq	gene	403380	403937	.	+	.	ID=gene403;Name=sodC;Dbxref=GeneID:4547606;gbkey=Gene;gene=sodC;locus_tag=FTN_0405	536	243	-0.524309	6.55583	0.0261811		-0.524309	0.695292	-0.157833
gi|118496615|ref|NC_008601.1|	RefSeq	gene	403941	404732	.	+	.	ID=gene404;Name=FTN_0406;Dbxref=GeneID:4547721;gbkey=Gene;locus_tag=FTN_0406	1381	894	-0.0105759	7.48767	0.965517		-0.0105759	0.992696	-0.00318365
gi|118496615|ref|NC_008601.1|	RefSeq	gene	404707	406101	.	-	.	ID=gene405;Name=FTN_0407;Dbxref=GeneID:4547722;gbkey=Gene;locus_tag=FTN_0407	4488	2992	0.031826	9.498	0.879319		0.031826	1.02231	0.00958058
gi|118496615|ref|NC_008601.1|	RefSeq	gene	406141	406614	.	+	.	ID=gene406;Name=FTN_0408;Dbxref=GeneID:4547723;gbkey=Gene;locus_tag=FTN_0408	518	272	-0.312454	5.55834	0.183339		-0.312454	0.805271	-0.094058
gi|118496615|ref|NC_008601.1|	RefSeq	gene	406706	407818	.	+	.	ID=gene407;Name=adhC;Dbxref=GeneID:4547724;gbkey=Gene;gene=adhC;locus_tag=FTN_0409	63984	57175	0.454462	12.1951	0.0265422		0.454462	1.37027	0.136807
gi|118496615|ref|NC_008601.1|	RefSeq	gene	407867	409057	.	-	.	ID=gene408;Name=FTN_0410;Dbxref=GeneID:4547725;gbkey=Gene;locus_tag=FTN_0410	5666	2855	-0.372039	9.10905	0.0728345		-0.372039	0.77269	-0.111995
gi|118496615|ref|NC_008601.1|	RefSeq	gene	409260	410147	.	+	.	ID=gene409;Name=FTN_0411;Dbxref=GeneID:4547726;gbkey=Gene;locus_tag=FTN_0411	232	180	0.250512	5.1068	0.335373		0.250512	1.18963	0.0754115
gi|118496615|ref|NC_008601.1|	RefSeq	gene	410233	411882	.	+	.	ID=gene410;Name=recN;Dbxref=GeneID:4547727;gbkey=Gene;gene=recN;locus_tag=FTN_0412	4144	1918	-0.49461	8.4589	0.0178139		-0.49461	0.709753	-0.148893
gi|118496615|ref|NC_008601.1|	RefSeq	gene	412117	413349	.	-	.	ID=gene411;Name=pilV;Dbxref=GeneID:4547728;gbkey=Gene;gene=pilV;locus_tag=FTN_0413	1747	1191	0.0640779	8.6755	0.765274		0.0640779	1.04542	0.0192894
gi|118496615|ref|NC_008601.1|	RefSeq	gene	413582	414019	.	-	.	ID=gene412;Name=FTN_0414;Dbxref=GeneID:4547729;gbkey=Gene;locus_tag=FTN_0414	582	382	0.00934062	6.36759	0.978293		0.00934062	1.0065	0.00281181
gi|118496615|ref|NC_008601.1|	RefSeq	gene	414149	414556	.	-	.	ID=gene413;Name=pilA;Dbxref=GeneID:4547730;gbkey=Gene;gene=pilA;locus_tag=FTN_0415	5169	4188	0.313158	10.6419	0.130067		0.313158	1.24242	0.0942698
gi|118496615|ref|NC_008601.1|	RefSeq	gene	414941	415660	.	+	.	ID=gene414;Name=lpxE;Dbxref=GeneID:4547731;gbkey=Gene;gene=lpxE;locus_tag=FTN_0416	2283	878	-0.761782	7.16692	0.000351084		-0.761782	0.589767	-0.229319
gi|118496615|ref|NC_008601.1|	RefSeq	gene	415800	416648	.	+	.	ID=gene415;Name=folD;Dbxref=GeneID:4547732;gbkey=Gene;gene=folD;locus_tag=FTN_0417	5855	4156	0.122313	8.83678	0.554372		0.122313	1.08848	0.0368199
gi|118496615|ref|NC_008601.1|	RefSeq	gene	416811	417101	.	+	.	ID=gene416;Name=FTN_0418;Dbxref=GeneID:4547733;gbkey=Gene;locus_tag=FTN_0418	980	412	-0.633225	6.21655	0.0043585		-0.633225	0.644734	-0.19062
gi|118496615|ref|NC_008601.1|	RefSeq	gene	417319	418362	.	+	.	ID=gene417;Name=purM;Dbxref=GeneID:4547734;gbkey=Gene;gene=purM;locus_tag=FTN_0419	10956	8034	0.169257	9.78987	0.410421		0.169257	1.12448	0.0509513
gi|118496615|ref|NC_008601.1|	RefSeq	gene	418362	420674	.	+	.	ID=gene418;Name=FTN_0420;Dbxref=GeneID:4547735;gbkey=Gene;locus_tag=FTN_0420	21819	14084	-0.0147382	10.5262	0.942984		-0.0147382	0.989836	-0.00443664
gi|118496615|ref|NC_008601.1|	RefSeq	gene	420678	421253	.	+	.	ID=gene419;Name=purN;Dbxref=GeneID:4547736;gbkey=Gene;gene=purN;locus_tag=FTN_0421	4455	2799	-0.0537225	8.26845	0.797032		-0.0537225	0.963447	-0.0161721
gi|118496615|ref|NC_008601.1|	RefSeq	gene	421370	421861	.	+	.	ID=gene420;Name=purE;Dbxref=GeneID:4547737;gbkey=Gene;gene=purE;locus_tag=FTN_0422	3519	2099	-0.128668	7.96949	0.538227		-0.128668	0.914676	-0.0387329
gi|118496615|ref|NC_008601.1|	RefSeq	gene	421865	422962	.	+	.	ID=gene421;Name=purK;Dbxref=GeneID:4547738;gbkey=Gene;gene=purK;locus_tag=FTN_0423	2665	1413	-0.298566	7.88417	0.155882		-0.298566	0.81306	-0.0898772
gi|118496615|ref|NC_008601.1|	RefSeq	gene	422959	423312	.	-	.	ID=gene422;Name=FTN_0424;Dbxref=GeneID:4547739;gbkey=Gene;locus_tag=FTN_0424	360	232	-0.0170753	5.34017	0.949618		-0.0170753	0.988234	-0.00514018
gi|118496615|ref|NC_008601.1|	RefSeq	gene	423393	425399	.	-	.	ID=gene423;Name=prlC;Dbxref=GeneID:4547740;gbkey=Gene;gene=prlC;locus_tag=FTN_0425	10581	6063	-0.18658	9.36281	0.364785		-0.18658	0.878686	-0.0561661
gi|118496615|ref|NC_008601.1|	RefSeq	gene	425491	425862	.	+	.	ID=gene424;Name=FTN_0426;Dbxref=GeneID:4548076;gbkey=Gene;locus_tag=FTN_0426	2441	598	-1.41232	6.79129	8.7042e-11		-1.41232	0.375708	-0.42515
gi|118496615|ref|NC_008601.1|	RefSeq	gene	425944	426393	.	+	.	ID=gene425;Name=FTN_0427;Dbxref=GeneID:4548077;gbkey=Gene;locus_tag=FTN_0427	24129	21345	0.439917	10.8478	0.0320027		0.439917	1.35653	0.132428
gi|118496615|ref|NC_008601.1|	RefSeq	gene	426551	427030	.	+	.	ID=gene426;Name=FTN_0428;Dbxref=GeneID:4548078;gbkey=Gene;locus_tag=FTN_0428	2431	1199	-0.4029	7.61007	0.0564371		-0.4029	0.756337	-0.121285
gi|118496615|ref|NC_008601.1|	RefSeq	gene	427130	427633	.	+	.	ID=gene427;Name=FTN_0429;Dbxref=GeneID:4548079;gbkey=Gene;locus_tag=FTN_0429	6180	2581	-0.642867	8.767	0.00198584		-0.642867	0.640439	-0.193522
gi|118496615|ref|NC_008601.1|	RefSeq	gene	427666	428133	.	+	.	ID=gene428;Name=FTN_0430;Dbxref=GeneID:4548080;gbkey=Gene;locus_tag=FTN_0430	1606	1137	0.118539	8.34989	0.57912		0.118539	1.08564	0.0356839
gi|118496615|ref|NC_008601.1|	RefSeq	gene	428206	429648	.	+	.	ID=gene429;Name=FTN_0431;Dbxref=GeneID:4548081;gbkey=Gene;locus_tag=FTN_0431	1574	754	-0.444959	7.90889	0.0383861		-0.444959	0.734605	-0.133946
gi|118496615|ref|NC_008601.1|	RefSeq	gene	429702	431996	.	-	.	ID=gene430;Name=topA;Dbxref=GeneID:4548082;gbkey=Gene;gene=topA;locus_tag=FTN_0432	5259	2656	-0.368732	8.77461	0.0757146		-0.368732	0.774463	-0.110999
gi|118496615|ref|NC_008601.1|	RefSeq	gene	432195	432836	.	+	.	ID=gene431;Name=parA;Dbxref=GeneID:4548083;gbkey=Gene;gene=parA;locus_tag=FTN_0433	3353	1736	-0.332879	8.03231	0.111647		-0.332879	0.79395	-0.100207
gi|118496615|ref|NC_008601.1|	RefSeq	gene	432829	433743	.	+	.	ID=gene432;Name=parB;Dbxref=GeneID:4548084;gbkey=Gene;gene=parB;locus_tag=FTN_0434	5897	4415	0.199217	8.8824	0.335047		0.199217	1.14808	0.0599703
gi|118496615|ref|NC_008601.1|	RefSeq	gene	433757	434464	.	+	.	ID=gene433;Name=FTN_0435;Dbxref=GeneID:4548085;gbkey=Gene;locus_tag=FTN_0435	3428	2496	0.159034	8.04623	0.445533		0.159034	1.11654	0.0478739
gi|118496615|ref|NC_008601.1|	RefSeq	gene	434467	435348	.	+	.	ID=gene434;Name=FTN_0436;Dbxref=GeneID:4548086;gbkey=Gene;locus_tag=FTN_0436	3253	2411	0.184642	8.04372	0.376001		0.184642	1.13654	0.0555829
gi|118496615|ref|NC_008601.1|	RefSeq	gene	435345	435935	.	+	.	ID=gene435;Name=FTN_0437;Dbxref=GeneID:4548087;gbkey=Gene;locus_tag=FTN_0437	944	727	0.239923	6.67927	0.273858		0.239923	1.18093	0.0722239
gi|118496615|ref|NC_008601.1|	RefSeq	gene	435995	436615	.	-	.	ID=gene436;Name=rrmJ;Dbxref=GeneID:4548088;gbkey=Gene;gene=rrmJ;locus_tag=FTN_0438	428	310	0.151396	6.02971	0.52469		0.151396	1.11064	0.0455748
gi|118496615|ref|NC_008601.1|	RefSeq	gene	436773	437240	.	+	.	ID=gene437;Name=FTN_0439;Dbxref=GeneID:4548089;gbkey=Gene;locus_tag=FTN_0439	1007	691	0.0734727	6.59693	0.742825		0.0734727	1.05225	0.0221175
gi|118496615|ref|NC_008601.1|	RefSeq	gene	437235	437720	.	-	.	ID=gene438;Name=lspA;Dbxref=GeneID:4548090;gbkey=Gene;gene=lspA;locus_tag=FTN_0440	830	601	0.151017	6.60696	0.494657		0.151017	1.11035	0.0454607
gi|118496615|ref|NC_008601.1|	RefSeq	gene	437707	440514	.	-	.	ID=gene439;Name=ileS;Dbxref=GeneID:4548091;gbkey=Gene;gene=ileS;locus_tag=FTN_0441	24192	18933	0.263161	10.8736	0.19914		0.263161	1.20011	0.0792194
gi|118496615|ref|NC_008601.1|	RefSeq	gene	440607	441527	.	-	.	ID=gene440;Name=ribF;Dbxref=GeneID:4548092;gbkey=Gene;gene=ribF;locus_tag=FTN_0442	1457	666	-0.512553	6.61852	0.0178978		-0.512553	0.700981	-0.154294
gi|118496615|ref|NC_008601.1|	RefSeq	gene	441678	443492	.	+	.	ID=gene441;Name=maeA;Dbxref=GeneID:4548093;gbkey=Gene;gene=maeA;locus_tag=FTN_0443	35680	20512	-0.181857	11.2394	0.37456		-0.181857	0.881567	-0.0547444
gi|118496615|ref|NC_008601.1|	RefSeq	gene	443654	445327	.	+	.	ID=gene442;Name=FTN_0444;Dbxref=GeneID:4548094;gbkey=Gene;locus_tag=FTN_0444	10642	6052	-0.197493	10.6255	0.337399		-0.197493	0.872065	-0.0594513
gi|118496615|ref|NC_008601.1|	RefSeq	gene	445344	446789	.	+	.	ID=gene443;Name=FTN_0445;Dbxref=GeneID:4548609;gbkey=Gene;locus_tag=FTN_0445	924	592	-0.0255019	7.7988	0.914345		-0.0255019	0.982479	-0.00767684
gi|118496615|ref|NC_008601.1|	RefSeq	gene	446993	448390	.	+	.	ID=gene444;Name=engA;Dbxref=GeneID:4548610;gbkey=Gene;gene=engA;gene_synonym=yfgK,yphC;locus_tag=FTN_0446	6360	4811	0.214095	9.33579	0.299774		0.214095	1.15998	0.064449
gi|118496615|ref|NC_008601.1|	RefSeq	gene	448359	449663	.	+	.	ID=gene445;Name=murA;Dbxref=GeneID:4548611;gbkey=Gene;gene=murA;locus_tag=FTN_0447	3791	3200	0.37227	8.61324	0.0730548		0.37227	1.29439	0.112064
gi|118496615|ref|NC_008601.1|	RefSeq	gene	449671	450519	.	+	.	ID=gene446;Name=murB;Dbxref=GeneID:4548612;gbkey=Gene;gene=murB;locus_tag=FTN_0448	1967	1103	-0.217757	7.37546	0.305312		-0.217757	0.859902	-0.0655512
gi|118496615|ref|NC_008601.1|	RefSeq	gene	450598	451473	.	+	.	ID=gene447;Name=FTN_0449;Dbxref=GeneID:4548613;gbkey=Gene;locus_tag=FTN_0449	5417	2287	-0.627226	8.35208	0.00259307		-0.627226	0.64742	-0.188814
gi|118496615|ref|NC_008601.1|	RefSeq	gene	451475	452251	.	-	.	ID=gene448;Name=FTN_0450;Dbxref=GeneID:4548614;gbkey=Gene;locus_tag=FTN_0450	2041	923	-0.528037	7.1172	0.0131297		-0.528037	0.693498	-0.158955
gi|118496615|ref|NC_008601.1|	RefSeq	gene	452274	454379	.	-	.	ID=gene449;Name=FTN_0451;Dbxref=GeneID:4548615;gbkey=Gene;locus_tag=FTN_0451	3272	2125	-0.00592007	8.36503	0.979489		-0.00592007	0.995905	-0.00178212
gi|118496615|ref|NC_008601.1|	RefSeq	gene	454529	455932	.	+	.	ID=gene450;Name=FTN_0452;Dbxref=GeneID:4548616;gbkey=Gene;locus_tag=FTN_0452	1355	594	-0.57289	6.67947	0.00844966		-0.57289	0.672269	-0.172457
gi|118496615|ref|NC_008601.1|	RefSeq	gene	455936	457252	.	+	.	ID=gene451;Name=FTN_0453;Dbxref=GeneID:4548617;gbkey=Gene;locus_tag=FTN_0453	745	418	-0.2169	6.17701	0.334396		-0.2169	0.860412	-0.0652935
gi|118496615|ref|NC_008601.1|	RefSeq	gene	457266	458282	.	+	.	ID=gene452;Name=FTN_0454;Dbxref=GeneID:4548618;gbkey=Gene;locus_tag=FTN_0454	721	556	0.241828	5.95372	0.27702		0.241828	1.18249	0.0727976
gi|118496615|ref|NC_008601.1|	RefSeq	gene	458374	461274	.	+	.	ID=gene453;Name=FTN_0455;Dbxref=GeneID:4548619;gbkey=Gene;locus_tag=FTN_0455	4643	2055	-0.559107	8.33433	0.00733217		-0.559107	0.678722	-0.168308
gi|118496615|ref|NC_008601.1|	RefSeq	gene	461255	463573	.	+	.	ID=gene454;Name=FTN_0456;Dbxref=GeneID:4548620;gbkey=Gene;locus_tag=FTN_0456	3456	1678	-0.425549	7.91154	0.0420552		-0.425549	0.744555	-0.128103
gi|118496615|ref|NC_008601.1|	RefSeq	gene	463591	464250	.	+	.	ID=gene455;Name=FTN_0457;Dbxref=GeneID:4548621;gbkey=Gene;locus_tag=FTN_0457	374	229	-0.0908632	5.4063	0.723454		-0.0908632	0.938961	-0.0273525
gi|118496615|ref|NC_008601.1|	RefSeq	gene	464765	465103	.	-	.	ID=gene456;Name=hitA;Dbxref=GeneID:4548622;gbkey=Gene;gene=hitA;locus_tag=FTN_0458	2696	880	-0.998375	7.40726	2.84052e-06		-0.998375	0.500564	-0.300541
gi|118496615|ref|NC_008601.1|	RefSeq	gene	465109	466767	.	-	.	ID=gene457;Name=ubiB;Dbxref=GeneID:4548623;gbkey=Gene;gene=ubiB;locus_tag=FTN_0459	3905	1686	-0.5949	8.21785	0.00448101		-0.5949	0.66209	-0.179083
gi|118496615|ref|NC_008601.1|	RefSeq	gene	466760	467347	.	-	.	ID=gene458;Name=FTN_0460;Dbxref=GeneID:4548624;gbkey=Gene;locus_tag=FTN_0460	3049	1901	-0.0647848	7.79452	0.758398		-0.0647848	0.956088	-0.0195022
gi|118496615|ref|NC_008601.1|	RefSeq	gene	467349	468101	.	-	.	ID=gene459;Name=ubiE;Dbxref=GeneID:4548625;gbkey=Gene;gene=ubiE;locus_tag=FTN_0461	6294	4679	0.189008	8.95387	0.360103		0.189008	1.13998	0.0568972
gi|118496615|ref|NC_008601.1|	RefSeq	gene	468195	469211	.	+	.	ID=gene460;Name=glk;Dbxref=GeneID:4548626;gbkey=Gene;gene=glk;locus_tag=FTN_0462	12343	6587	-0.289206	9.56248	0.159823		-0.289206	0.818352	-0.0870597
gi|118496615|ref|NC_008601.1|	RefSeq	gene	469213	469476	.	-	.	ID=gene461;Name=FTN_0463;Dbxref=GeneID:4548627;gbkey=Gene;locus_tag=FTN_0463	1710	1252	0.167014	7.08562	0.4319		0.167014	1.12273	0.0502762
gi|118496615|ref|NC_008601.1|	RefSeq	gene	469550	470080	.	-	.	ID=gene462;Name=FTN_0464;Dbxref=GeneID:4548628;gbkey=Gene;locus_tag=FTN_0464	934	549	-0.149801	6.45569	0.494756		-0.149801	0.901375	-0.0450947
gi|118496615|ref|NC_008601.1|	RefSeq	gene	470141	470755	.	+	.	ID=gene463;Name=FTN_0465;Dbxref=GeneID:4548224;gbkey=Gene;locus_tag=FTN_0465	1245	380	-1.09509	6.39663	8.62607e-07		-1.09509	0.468108	-0.329654
gi|118496615|ref|NC_008601.1|	RefSeq	gene	470805	471407	.	+	.	ID=gene464;Name=FTN_0466;Dbxref=GeneID:4548225;gbkey=Gene;locus_tag=FTN_0466	397	222	-0.221698	5.63189	0.367121		-0.221698	0.857555	-0.0667379
gi|118496615|ref|NC_008601.1|	RefSeq	gene	471404	472627	.	-	.	ID=gene465;Name=FTN_0467;Dbxref=GeneID:4548226;gbkey=Gene;locus_tag=FTN_0467	1116	691	-0.0747794	6.95894	0.737475		-0.0747794	0.949487	-0.0225109
gi|118496615|ref|NC_008601.1|	RefSeq	gene	472644	474701	.	-	.	ID=gene466;Name=metG;Dbxref=GeneID:4548227;gbkey=Gene;gene=metG;locus_tag=FTN_0468	5739	2177	-0.781641	8.68644	0.000179108		-0.781641	0.581705	-0.235297
gi|118496615|ref|NC_008601.1|	RefSeq	gene	474850	474941	.	-	.	ID=gene467;Name=FTN_0469;Dbxref=GeneID:4548228;gbkey=Gene;locus_tag=FTN_0469	396	394	0.609295	6.98165	0.00807657		0.609295	1.52551	0.183416
gi|118496615|ref|NC_008601.1|	RefSeq	gene	474969	475044	.	-	.	ID=gene468;Name=FTN_0470;Dbxref=GeneID:4548229;gbkey=Gene;locus_tag=FTN_0470	475	399	0.365148	7.28601	0.111644		0.365148	1.28801	0.109921
gi|118496615|ref|NC_008601.1|	RefSeq	gene	475224	475760	.	-	.	ID=gene469;Name=FTN_0471;Dbxref=GeneID:4548230;gbkey=Gene;locus_tag=FTN_0471	8810	3303	-0.798557	9.06153	0.000119797		-0.798557	0.574924	-0.24039
gi|118496615|ref|NC_008601.1|	RefSeq	gene	476249	477772	.	+	.	ID=gene470;Name=FTN_0472;Dbxref=GeneID:4548231;gbkey=Gene;locus_tag=FTN_0472	9453	5437	-0.181169	9.19049	0.379276		-0.181169	0.881988	-0.0545372
gi|118496615|ref|NC_008601.1|	RefSeq	gene	477868	477944	.	-	.	ID=gene471;Name=FTN_0473;Dbxref=GeneID:4548232;gbkey=Gene;locus_tag=FTN_0473	319	178	-0.224774	6.6589	0.372133		-0.224774	0.855729	-0.0676638
gi|118496615|ref|NC_008601.1|	RefSeq	gene	477959	478034	.	-	.	ID=gene472;Name=FTN_0474;Dbxref=GeneID:4548233;gbkey=Gene;locus_tag=FTN_0474	302	207	0.0718367	6.82734	0.792834		0.0718367	1.05105	0.021625
gi|118496615|ref|NC_008601.1|	RefSeq	gene	478108	480969	.	+	.	ID=gene473;Name=FTN_0475;Dbxref=GeneID:4548234;gbkey=Gene;locus_tag=FTN_0475	20242	7071	-0.900567	9.98033	1.3359e-05		-0.900567	0.535676	-0.271098
gi|118496615|ref|NC_008601.1|	RefSeq	gene	481018	481134	.	+	.	ID=gene474;Name=FTN_0476;Dbxref=GeneID:4548235;gbkey=Gene;locus_tag=FTN_0476	88	63	0.134417	2.60463	0.710195		0.134417	1.09765	0.0404636
gi|118496615|ref|NC_008601.1|	RefSeq	gene	481348	482235	.	+	.	ID=gene475;Name=FTN_0477;Dbxref=GeneID:4547455;gbkey=Gene;locus_tag=FTN_0477	1535	1047	0.0648061	9.80465	0.764166		0.0648061	1.04594	0.0195086
gi|118496615|ref|NC_008601.1|	RefSeq	gene	483383	484438	.	-	.	ID=gene476;Name=FTN_0478;Dbxref=GeneID:4547456;gbkey=Gene;locus_tag=FTN_0478	613	338	-0.242009	7.38308	0.287203		-0.242009	0.845567	-0.072852
gi|118496615|ref|NC_008601.1|	RefSeq	gene	484552	485208	.	-	.	ID=gene477;Name=FTN_0479;Dbxref=GeneID:4547457;gbkey=Gene;locus_tag=FTN_0479	432	252	-0.160758	6.33256	0.512621		-0.160758	0.894555	-0.0483931
gi|118496615|ref|NC_008601.1|	RefSeq	gene	486541	486876	.	+	.	ID=gene478;Name=FTN_0480;Dbxref=GeneID:4547458;gbkey=Gene;locus_tag=FTN_0480	9473	4683	-0.399591	9.31565	0.0527671		-0.399591	0.758073	-0.120289
gi|118496615|ref|NC_008601.1|	RefSeq	gene	486849	487700	.	-	.	ID=gene479;Name=psd;Dbxref=GeneID:4547459;gbkey=Gene;gene=psd;locus_tag=FTN_0481	6514	3153	-0.430017	9.06457	0.037906		-0.430017	0.742253	-0.129448
gi|118496615|ref|NC_008601.1|	RefSeq	gene	487800	488780	.	+	.	ID=gene480;Name=FTN_0482;Dbxref=GeneID:4547460;gbkey=Gene;locus_tag=FTN_0482	2289	1665	0.157584	8.35125	0.454128		0.157584	1.11542	0.0474376
gi|118496615|ref|NC_008601.1|	RefSeq	gene	488789	489832	.	+	.	ID=gene481;Name=FTN_0483;Dbxref=GeneID:4547461;gbkey=Gene;locus_tag=FTN_0483	1965	1012	-0.340501	8.16988	0.109193		-0.340501	0.789767	-0.102501
gi|118496615|ref|NC_008601.1|	RefSeq	gene	489846	491213	.	+	.	ID=gene482;Name=glmU;Dbxref=GeneID:4547462;gbkey=Gene;gene=glmU;locus_tag=FTN_0484	18398	8881	-0.433961	10.3872	0.034755		-0.433961	0.740227	-0.130635
gi|118496615|ref|NC_008601.1|	RefSeq	gene	491234	493072	.	+	.	ID=gene483;Name=glmS;Dbxref=GeneID:4547463;gbkey=Gene;gene=glmS;locus_tag=FTN_0485	22283	16026	0.14126	10.8614	0.490731		0.14126	1.10287	0.0425234
gi|118496615|ref|NC_008601.1|	RefSeq	gene	493144	493677	.	+	.	ID=gene484;Name=FTN_0486;Dbxref=GeneID:4547464;gbkey=Gene;locus_tag=FTN_0486	1505	657	-0.578937	7.86662	0.00746041		-0.578937	0.669457	-0.174277
gi|118496615|ref|NC_008601.1|	RefSeq	gene	493674	493871	.	-	.	ID=gene485;Name=rpsU;Dbxref=GeneID:4547465;gbkey=Gene;gene=rpsU;locus_tag=FTN_0487	13470	7376	-0.252047	9.84842	0.220219		-0.252047	0.839704	-0.0758736
gi|118496615|ref|NC_008601.1|	RefSeq	gene	493871	494074	.	-	.	ID=gene486;Name=cspC;Dbxref=GeneID:4547466;gbkey=Gene;gene=cspC;locus_tag=FTN_0488	32491	17249	-0.296736	10.8977	0.147666		-0.296736	0.814092	-0.0893265
gi|118496615|ref|NC_008601.1|	RefSeq	gene	494325	494654	.	-	.	ID=gene487;Name=FTN_0489;Dbxref=GeneID:4547467;gbkey=Gene;locus_tag=FTN_0489	238	190	0.29166	4.8649	0.261352		0.29166	1.22405	0.0877983
gi|118496615|ref|NC_008601.1|	RefSeq	gene	494781	495551	.	+	.	ID=gene488;Name=map;Dbxref=GeneID:4547468;gbkey=Gene;gene=map;locus_tag=FTN_0490	3724	2699	0.152356	8.31853	0.464238		0.152356	1.11138	0.0458636
gi|118496615|ref|NC_008601.1|	RefSeq	gene	495553	496401	.	+	.	ID=gene489;Name=FTN_0491;Dbxref=GeneID:4547469;gbkey=Gene;locus_tag=FTN_0491	3322	2429	0.165093	8.12578	0.428615		0.165093	1.12124	0.0496979
gi|118496615|ref|NC_008601.1|	RefSeq	gene	496504	498732	.	+	.	ID=gene490;Name=parC;Dbxref=GeneID:4547470;gbkey=Gene;gene=parC;locus_tag=FTN_0492	9232	4562	-0.40018	9.35426	0.0524714		-0.40018	0.757764	-0.120466
gi|118496615|ref|NC_008601.1|	RefSeq	gene	498729	499415	.	+	.	ID=gene491;Name=mtn;Dbxref=GeneID:4547471;gbkey=Gene;gene=mtn;locus_tag=FTN_0493	6134	2540	-0.65519	8.45921	0.00162896		-0.65519	0.634992	-0.197232
gi|118496615|ref|NC_008601.1|	RefSeq	gene	499402	500001	.	-	.	ID=gene492;Name=FTN_0494;Dbxref=GeneID:4547472;gbkey=Gene;locus_tag=FTN_0494	1070	397	-0.813456	6.279	0.000253682		-0.813456	0.569017	-0.244875
gi|118496615|ref|NC_008601.1|	RefSeq	gene	499994	501112	.	-	.	ID=gene493;Name=FTN_0495;Dbxref=GeneID:4547473;gbkey=Gene;locus_tag=FTN_0495	415	231	-0.228339	6.11155	0.343187		-0.228339	0.853617	-0.0687368
gi|118496615|ref|NC_008601.1|	RefSeq	gene	501311	503287	.	+	.	ID=gene494;Name=slt;Dbxref=GeneID:4547663;gbkey=Gene;gene=slt;locus_tag=FTN_0496	2241	884	-0.725171	7.51754	0.000665743		-0.725171	0.604925	-0.218298
gi|118496615|ref|NC_008601.1|	RefSeq	gene	503301	503723	.	-	.	ID=gene495;Name=FTN_0497;Dbxref=GeneID:4547664;gbkey=Gene;locus_tag=FTN_0497	283	178	-0.0521069	5.07136	0.854947		-0.0521069	0.964527	-0.0156857
gi|118496615|ref|NC_008601.1|	RefSeq	gene	504268	505497	.	+	.	ID=gene496;Name=FTN_0498;Dbxref=GeneID:4547665;gbkey=Gene;locus_tag=FTN_0498	540	257	-0.454252	5.84492	0.0530962		-0.454252	0.729889	-0.136743
gi|118496615|ref|NC_008601.1|	RefSeq	gene	505748	509227	.	+	.	ID=gene497;Name=dnaE;Dbxref=GeneID:4547666;gbkey=Gene;gene=dnaE;locus_tag=FTN_0499	4593	3476	0.214774	8.94405	0.300116		0.214774	1.16052	0.0646535
gi|118496615|ref|NC_008601.1|	RefSeq	gene	509303	509938	.	+	.	ID=gene498;Name=FTN_0500;Dbxref=GeneID:4547667;gbkey=Gene;locus_tag=FTN_0500	1341	454	-0.945605	6.18717	1.71095e-05		-0.945605	0.519212	-0.284655
gi|118496615|ref|NC_008601.1|	RefSeq	gene	509999	510121	.	+	.	ID=gene499;Name=FTN_0501;Dbxref=GeneID:4547668;gbkey=Gene;locus_tag=FTN_0501	72	171	1.86252	3.43712	8.07142e-11		1.86252	3.63642	0.560675
gi|118496615|ref|NC_008601.1|	RefSeq	gene	510648	511910	.	+	.	ID=gene500;Name=FTN_0502;Dbxref=GeneID:4547669;gbkey=Gene;locus_tag=FTN_0502	1146	768	0.0393556	8.21517	0.860259		0.0393556	1.02765	0.0118472
gi|118496615|ref|NC_008601.1|	RefSeq	gene	511903	512598	.	+	.	ID=gene501;Name=FTN_0503;Dbxref=GeneID:4547670;gbkey=Gene;locus_tag=FTN_0503	568	455	0.296694	7.21337	0.191226		0.296694	1.22833	0.0893137
gi|118496615|ref|NC_008601.1|	RefSeq	gene	512714	514855	.	+	.	ID=gene502;Name=FTN_0504;Dbxref=GeneID:4547671;gbkey=Gene;locus_tag=FTN_0504	7473	2917	-0.740393	9.15549	0.000365374		-0.740393	0.598576	-0.22288
gi|118496615|ref|NC_008601.1|	RefSeq	gene	514946	516022	.	+	.	ID=gene503;Name=gcvT;Dbxref=GeneID:4547672;gbkey=Gene;gene=gcvT;locus_tag=FTN_0505	26970	11202	-0.650805	10.521	0.00156359		-0.650805	0.636925	-0.195912
gi|118496615|ref|NC_008601.1|	RefSeq	gene	516080	516463	.	+	.	ID=gene504;Name=gcvH;Dbxref=GeneID:4547673;gbkey=Gene;gene=gcvH;locus_tag=FTN_0506	8378	6198	0.181983	9.21138	0.377004		0.181983	1.13444	0.0547824
gi|118496615|ref|NC_008601.1|	RefSeq	gene	516528	517895	.	+	.	ID=gene505;Name=gcvP1;Dbxref=GeneID:4547674;gbkey=Gene;gene=gcvP1;locus_tag=FTN_0507	13212	7569	-0.186882	9.88479	0.363304		-0.186882	0.878502	-0.0562572
gi|118496615|ref|NC_008601.1|	RefSeq	gene	517901	519346	.	+	.	ID=gene506;Name=gcvP2;Dbxref=GeneID:4547675;gbkey=Gene;gene=gcvP2;locus_tag=FTN_0508	10195	6041	-0.138211	9.71363	0.50215		-0.138211	0.908645	-0.0416056
gi|118496615|ref|NC_008601.1|	RefSeq	gene	519765	523157	.	+	.	ID=gene507;Name=FTN_0509;Dbxref=GeneID:4547676;gbkey=Gene;locus_tag=FTN_0509	9669	7042	0.159406	9.78987	0.4386		0.159406	1.11683	0.0479859
gi|118496615|ref|NC_008601.1|	RefSeq	gene	523321	523686	.	+	.	ID=gene508;Name=FTN_0510;Dbxref=GeneID:4547677;gbkey=Gene;locus_tag=FTN_0510	1577	1146	0.1562	6.87858	0.464		0.1562	1.11435	0.0470208
gi|118496615|ref|NC_008601.1|	RefSeq	gene	523814	524659	.	-	.	ID=gene509;Name=FTN_0511;Dbxref=GeneID:4547678;gbkey=Gene;locus_tag=FTN_0511	918	365	-0.713656	6.47479	0.00144189		-0.713656	0.609773	-0.214832
gi|118496615|ref|NC_008601.1|	RefSeq	gene	524685	527897	.	-	.	ID=gene510;Name=glgX;Dbxref=GeneID:4547679;gbkey=Gene;gene=glgX;locus_tag=FTN_0512	3399	1981	-0.162084	8.43111	0.438257		-0.162084	0.893733	-0.0487922
gi|118496615|ref|NC_008601.1|	RefSeq	gene	527931	529853	.	-	.	ID=gene511;Name=glgB;Dbxref=GeneID:4547680;gbkey=Gene;gene=glgB;locus_tag=FTN_0513	6764	3585	-0.299107	8.83695	0.148108		-0.299107	0.812756	-0.09004
gi|118496615|ref|NC_008601.1|	RefSeq	gene	530155	531789	.	+	.	ID=gene512;Name=pgm;Dbxref=GeneID:4547357;gbkey=Gene;gene=pgm;locus_tag=FTN_0514	9414	2866	-1.09895	9.03826	1.41019e-07		-1.09895	0.466855	-0.330818
gi|118496615|ref|NC_008601.1|	RefSeq	gene	531823	533094	.	+	.	ID=gene513;Name=glgC;Dbxref=GeneID:4547358;gbkey=Gene;gene=glgC;locus_tag=FTN_0515	21755	13303	-0.0928052	10.4212	0.650936		-0.0928052	0.937698	-0.0279371
gi|118496615|ref|NC_008601.1|	RefSeq	gene	533104	534573	.	+	.	ID=gene514;Name=glgA;Dbxref=GeneID:4547359;gbkey=Gene;gene=glgA;locus_tag=FTN_0516	5639	3326	-0.144858	8.71991	0.484557		-0.144858	0.904469	-0.0436065
gi|118496615|ref|NC_008601.1|	RefSeq	gene	534678	536951	.	+	.	ID=gene515;Name=glgP;Dbxref=GeneID:4547360;gbkey=Gene;gene=glgP;locus_tag=FTN_0517	8766	3148	-0.860673	9.04274	3.46223e-05		-0.860673	0.550696	-0.259088
gi|118496615|ref|NC_008601.1|	RefSeq	gene	536994	538457	.	+	.	ID=gene516;Name=malQ;Dbxref=GeneID:4547361;gbkey=Gene;gene=malQ;locus_tag=FTN_0518	1831	921	-0.374534	7.21396	0.0790238		-0.374534	0.771355	-0.112746
gi|118496615|ref|NC_008601.1|	RefSeq	gene	538549	539439	.	+	.	ID=gene517;Name=glyQ;Dbxref=GeneID:4547362;gbkey=Gene;gene=glyQ;locus_tag=FTN_0519	1551	1238	0.291576	7.52917	0.169923		0.291576	1.22398	0.0877733
gi|118496615|ref|NC_008601.1|	RefSeq	gene	539650	541089	.	+	.	ID=gene518;Name=murE;Dbxref=GeneID:4547363;gbkey=Gene;gene=murE;locus_tag=FTN_0520	2447	1260	-0.340777	7.6069	0.106301		-0.340777	0.789616	-0.102584
gi|118496615|ref|NC_008601.1|	RefSeq	gene	541170	541529	.	+	.	ID=gene519;Name=FTN_0521;Dbxref=GeneID:4547364;gbkey=Gene;locus_tag=FTN_0521	973	288	-1.13931	5.86509	5.4239e-07		-1.13931	0.453976	-0.342967
gi|118496615|ref|NC_008601.1|	RefSeq	gene	541881	543239	.	+	.	ID=gene520;Name=murF;Dbxref=GeneID:4547365;gbkey=Gene;gene=murF;locus_tag=FTN_0522	2141	1074	-0.378471	7.51797	0.07424		-0.378471	0.769253	-0.113931
gi|118496615|ref|NC_008601.1|	RefSeq	gene	543248	544066	.	+	.	ID=gene521;Name=FTN_0523;Dbxref=GeneID:4547366;gbkey=Gene;locus_tag=FTN_0523	639	407	-0.0339894	6.45425	0.889229		-0.0339894	0.976716	-0.0102318
gi|118496615|ref|NC_008601.1|	RefSeq	gene	544116	545216	.	-	.	ID=gene522;Name=asd;Dbxref=GeneID:4547367;gbkey=Gene;gene=asd;locus_tag=FTN_0524	2174	947	-0.582076	7.27326	0.0061925		-0.582076	0.668002	-0.175222
gi|118496615|ref|NC_008601.1|	RefSeq	gene	545312	547732	.	+	.	ID=gene523;Name=thrA;Dbxref=GeneID:4547368;gbkey=Gene;gene=thrA;locus_tag=FTN_0525	14868	6371	-0.605822	9.76684	0.00329869		-0.605822	0.657097	-0.18237
gi|118496615|ref|NC_008601.1|	RefSeq	gene	547735	548688	.	+	.	ID=gene524;Name=thrB;Dbxref=GeneID:4547369;gbkey=Gene;gene=thrB;locus_tag=FTN_0526	4885	3771	0.243371	8.58566	0.239847		0.243371	1.18376	0.073262
gi|118496615|ref|NC_008601.1|	RefSeq	gene	548701	549990	.	+	.	ID=gene525;Name=thrC;Dbxref=GeneID:4547370;gbkey=Gene;gene=thrC;locus_tag=FTN_0527	4306	3277	0.22281	8.45608	0.282806		0.22281	1.167	0.0670724
gi|118496615|ref|NC_008601.1|	RefSeq	gene	550018	550740	.	-	.	ID=gene526;Name=lpxH;Dbxref=GeneID:4547371;gbkey=Gene;gene=lpxH;locus_tag=FTN_0528	608	437	0.140318	6.11327	0.539163		0.140318	1.10215	0.04224
gi|118496615|ref|NC_008601.1|	RefSeq	gene	550730	551356	.	-	.	ID=gene527;Name=pyrE;Dbxref=GeneID:4547372;gbkey=Gene;gene=pyrE;locus_tag=FTN_0529	439	216	-0.406238	5.59961	0.0895372		-0.406238	0.754588	-0.12229
gi|118496615|ref|NC_008601.1|	RefSeq	gene	551516	552886	.	+	.	ID=gene528;Name=mpl;Dbxref=GeneID:4547373;gbkey=Gene;gene=mpl;locus_tag=FTN_0530	4378	3459	0.276864	8.42272	0.181737		0.276864	1.21156	0.0833443
gi|118496615|ref|NC_008601.1|	RefSeq	gene	552883	553629	.	+	.	ID=gene529;Name=yjfH;Dbxref=GeneID:4547374;gbkey=Gene;gene=yjfH;locus_tag=FTN_0531	7096	6024	0.380498	9.03804	0.0650465		0.380498	1.30179	0.114541
gi|118496615|ref|NC_008601.1|	RefSeq	gene	553645	554289	.	-	.	ID=gene530;Name=FTN_0532;Dbxref=GeneID:4547375;gbkey=Gene;locus_tag=FTN_0532	1777	1414	0.287106	7.10374	0.174549		0.287106	1.22019	0.0864275
gi|118496615|ref|NC_008601.1|	RefSeq	gene	554319	555512	.	-	.	ID=gene531;Name=FTN_0533;Dbxref=GeneID:4547376;gbkey=Gene;locus_tag=FTN_0533	1333	545	-0.673462	6.59965	0.00202337		-0.673462	0.627	-0.202732
gi|118496615|ref|NC_008601.1|	RefSeq	gene	555784	556827	.	+	.	ID=gene532;Name=FTN_0534;Dbxref=GeneID:4547511;gbkey=Gene;locus_tag=FTN_0534	649	384	-0.140288	6.34673	0.544327		-0.140288	0.907338	-0.042231
gi|118496615|ref|NC_008601.1|	RefSeq	gene	556910	558136	.	+	.	ID=gene533;Name=FTN_0535;Dbxref=GeneID:4547512;gbkey=Gene;locus_tag=FTN_0535	1713	793	-0.494291	7.23052	0.02106		-0.494291	0.709911	-0.148796
gi|118496615|ref|NC_008601.1|	RefSeq	gene	558170	560011	.	+	.	ID=gene534;Name=yjjK;Dbxref=GeneID:4547513;gbkey=Gene;gene=yjjK;locus_tag=FTN_0536	3400	1969	-0.171274	8.08596	0.412694		-0.171274	0.888058	-0.0515586
gi|118496615|ref|NC_008601.1|	RefSeq	gene	560098	561510	.	+	.	ID=gene535;Name=FTN_0537;Dbxref=GeneID:4547514;gbkey=Gene;locus_tag=FTN_0537	1466	648	-0.560959	6.82913	0.00932982		-0.560959	0.677851	-0.168866
gi|118496615|ref|NC_008601.1|	RefSeq	gene	561535	562995	.	-	.	ID=gene536;Name=FTN_0538;Dbxref=GeneID:4547515;gbkey=Gene;locus_tag=FTN_0538	965	360	-0.805573	6.21793	0.00031237		-0.805573	0.572135	-0.242502
gi|118496615|ref|NC_008601.1|	RefSeq	gene	563016	564662	.	-	.	ID=gene537;Name=glnS;Dbxref=GeneID:4547516;gbkey=Gene;gene=glnS;locus_tag=FTN_0539	2321	1598	0.0783055	7.97059	0.71131		0.0783055	1.05578	0.0235723
gi|118496615|ref|NC_008601.1|	RefSeq	gene	564807	566399	.	+	.	ID=gene538;Name=pckA;Dbxref=GeneID:4547517;gbkey=Gene;gene=pckA;locus_tag=FTN_0540	3190	1820	-0.192819	8.41348	0.357073		-0.192819	0.874895	-0.0580442
gi|118496615|ref|NC_008601.1|	RefSeq	gene	566474	567571	.	+	.	ID=gene539;Name=mraY;Dbxref=GeneID:4547518;gbkey=Gene;gene=mraY;locus_tag=FTN_0541	3183	1820	-0.18965	7.8208	0.365063		-0.18965	0.876819	-0.0570902
gi|118496615|ref|NC_008601.1|	RefSeq	gene	567571	568824	.	+	.	ID=gene540;Name=murD;Dbxref=GeneID:4547519;gbkey=Gene;gene=murD;locus_tag=FTN_0542	2184	1189	-0.260415	7.25713	0.218526		-0.260415	0.834848	-0.0783927
gi|118496615|ref|NC_008601.1|	RefSeq	gene	568834	570039	.	+	.	ID=gene541;Name=ftsW;Dbxref=GeneID:4547520;gbkey=Gene;gene=ftsW;locus_tag=FTN_0543	1032	456	-0.561447	6.49246	0.0111863		-0.561447	0.677622	-0.169012
gi|118496615|ref|NC_008601.1|	RefSeq	gene	570047	570853	.	-	.	ID=gene542;Name=FTN_0544;Dbxref=GeneID:4547521;gbkey=Gene;locus_tag=FTN_0544	1178	316	-1.28129	6.18294	1.33037e-08		-1.28129	0.411428	-0.385706
gi|118496615|ref|NC_008601.1|	RefSeq	gene	570952	571908	.	+	.	ID=gene543;Name=FTN_0545;Dbxref=GeneID:4547522;gbkey=Gene;locus_tag=FTN_0545	2952	871	-1.14407	7.8016	8.40079e-08		-1.14407	0.452482	-0.344399
gi|118496615|ref|NC_008601.1|	RefSeq	gene	572301	574064	.	-	.	ID=gene544;Name=FTN_0546;Dbxref=GeneID:4547523;gbkey=Gene;locus_tag=FTN_0546	1687	797	-0.46497	7.24231	0.0300201		-0.46497	0.724486	-0.13997
gi|118496615|ref|NC_008601.1|	RefSeq	gene	574156	574419	.	-	.	ID=gene545;Name=FTN_0547;Dbxref=GeneID:4547524;gbkey=Gene;locus_tag=FTN_0547	454	202	-0.551324	5.61647	0.021823		-0.551324	0.682394	-0.165965
gi|118496615|ref|NC_008601.1|	RefSeq	gene	574440	574754	.	-	.	ID=gene546;Name=FTN_0548;Dbxref=GeneID:4547525;gbkey=Gene;locus_tag=FTN_0548	1370	644	-0.472192	6.48464	0.0290142		-0.472192	0.720868	-0.142144
gi|118496615|ref|NC_008601.1|	RefSeq	gene	574840	575472	.	+	.	ID=gene547;Name=sspA;Dbxref=GeneID:4547526;gbkey=Gene;gene=sspA;locus_tag=FTN_0549	3497	2876	0.334723	8.3895	0.107517		0.334723	1.26113	0.100762
gi|118496615|ref|NC_008601.1|	RefSeq	gene	575484	576500	.	+	.	ID=gene548;Name=sohB;Dbxref=GeneID:4547527;gbkey=Gene;gene=sohB;locus_tag=FTN_0550	7898	6694	0.378164	9.44391	0.066486		0.378164	1.29969	0.113839
gi|118496615|ref|NC_008601.1|	RefSeq	gene	576508	577419	.	+	.	ID=gene549;Name=holB;Dbxref=GeneID:4547528;gbkey=Gene;gene=holB;locus_tag=FTN_0551	3641	1979	-0.262762	8.1501	0.208172		-0.262762	0.833491	-0.0790991
gi|118496615|ref|NC_008601.1|	RefSeq	gene	577430	577708	.	+	.	ID=gene550;Name=yhbY;Dbxref=GeneID:4547529;gbkey=Gene;gene=yhbY;locus_tag=FTN_0552	3551	1866	-0.311472	7.92181	0.136048		-0.311472	0.805819	-0.0937624
gi|118496615|ref|NC_008601.1|	RefSeq	gene	577716	578690	.	+	.	ID=gene551;Name=hemB;Dbxref=GeneID:4548458;gbkey=Gene;gene=hemB;locus_tag=FTN_0553	8249	5041	-0.0937179	9.42265	0.64984		-0.0937179	0.937105	-0.0282119
gi|118496615|ref|NC_008601.1|	RefSeq	gene	578694	579161	.	+	.	ID=gene552;Name=FTN_0554;Dbxref=GeneID:4548459;gbkey=Gene;locus_tag=FTN_0554	1052	825	0.266086	6.99592	0.218717		0.266086	1.20254	0.0800998
gi|118496615|ref|NC_008601.1|	RefSeq	gene	579267	580331	.	+	.	ID=gene553;Name=ansB;Dbxref=GeneID:4548460;gbkey=Gene;gene=ansB;locus_tag=FTN_0555	504	298	-0.141277	6.73633	0.559326		-0.141277	0.906716	-0.0425287
gi|118496615|ref|NC_008601.1|	RefSeq	gene	580679	581242	.	+	.	ID=gene554;Name=FTN_0556;Dbxref=GeneID:4548461;gbkey=Gene;locus_tag=FTN_0556	1250	738	-0.143428	7.29816	0.509375		-0.143428	0.905366	-0.043176
gi|118496615|ref|NC_008601.1|	RefSeq	gene	581293	583038	.	-	.	ID=gene555;Name=argS;Dbxref=GeneID:4548462;gbkey=Gene;gene=argS;locus_tag=FTN_0557	11265	4304	-0.771294	9.92202	0.000195398		-0.771294	0.585892	-0.232183
gi|118496615|ref|NC_008601.1|	RefSeq	gene	583164	585770	.	+	.	ID=gene556;Name=ostA1;Dbxref=GeneID:4548463;gbkey=Gene;gene=ostA1;locus_tag=FTN_0558	7203	1955	-1.2646	9.32815	1.81483e-09		-1.2646	0.416216	-0.380682
gi|118496615|ref|NC_008601.1|	RefSeq	gene	585770	587179	.	+	.	ID=gene557;Name=FTN_0559;Dbxref=GeneID:4548464;gbkey=Gene;locus_tag=FTN_0559	4642	1534	-0.980613	8.06952	3.10379e-06		-0.980613	0.506764	-0.295194
gi|118496615|ref|NC_008601.1|	RefSeq	gene	587181	587969	.	+	.	ID=gene558;Name=ksgA;Dbxref=GeneID:4548465;gbkey=Gene;gene=ksgA;locus_tag=FTN_0560	3343	1349	-0.692423	7.55194	0.000999351		-0.692423	0.618814	-0.20844
gi|118496615|ref|NC_008601.1|	RefSeq	gene	587981	588808	.	+	.	ID=gene559;Name=apaH;Dbxref=GeneID:4548466;gbkey=Gene;gene=apaH;locus_tag=FTN_0561	4958	2091	-0.628752	8.16903	0.002567		-0.628752	0.646736	-0.189273
gi|118496615|ref|NC_008601.1|	RefSeq	gene	588812	589249	.	+	.	ID=gene560;Name=aroD;Dbxref=GeneID:4548467;gbkey=Gene;gene=aroD;locus_tag=FTN_0562	10659	3928	-0.8234	9.07566	7.15245e-05		-0.8234	0.565109	-0.247868
gi|118496615|ref|NC_008601.1|	RefSeq	gene	589254	589736	.	+	.	ID=gene561;Name=accB;Dbxref=GeneID:4548468;gbkey=Gene;gene=accB;locus_tag=FTN_0563	14234	6897	-0.428505	10.0495	0.0373286		-0.428505	0.743031	-0.128993
gi|118496615|ref|NC_008601.1|	RefSeq	gene	589801	591156	.	+	.	ID=gene562;Name=accC;Dbxref=GeneID:4548469;gbkey=Gene;gene=accC;locus_tag=FTN_0564	10334	6954	0.0453051	10.4326	0.826143		0.0453051	1.0319	0.0136382
gi|118496615|ref|NC_008601.1|	RefSeq	gene	591250	591930	.	+	.	ID=gene563;Name=FTN_0565;Dbxref=GeneID:4548470;gbkey=Gene;locus_tag=FTN_0565	1016	277	-1.25785	7.16534	3.56223e-08		-1.25785	0.418166	-0.378652
gi|118496615|ref|NC_008601.1|	RefSeq	gene	591956	593074	.	+	.	ID=gene564;Name=FTN_0566;Dbxref=GeneID:4548471;gbkey=Gene;locus_tag=FTN_0566	533	270	-0.364269	6.79089	0.122024		-0.364269	0.776862	-0.109656
gi|118496615|ref|NC_008601.1|	RefSeq	gene	593079	594002	.	-	.	ID=gene565;Name=FTN_0567;Dbxref=GeneID:4548472;gbkey=Gene;locus_tag=FTN_0567	254	135	-0.294885	5.83529	0.258578		-0.294885	0.815138	-0.0887691
gi|118496615|ref|NC_008601.1|	RefSeq	gene	593999	594781	.	-	.	ID=gene566;Name=FTN_0568;Dbxref=GeneID:4548473;gbkey=Gene;locus_tag=FTN_0568	261	180	0.0806912	5.02306	0.76707		0.0806912	1.05752	0.0242905
gi|118496615|ref|NC_008601.1|	RefSeq	gene	594778	596520	.	-	.	ID=gene567;Name=recJ;Dbxref=GeneID:4548474;gbkey=Gene;gene=recJ;locus_tag=FTN_0569	1019	906	0.447161	6.99242	0.0386519		0.447161	1.36336	0.134609
gi|118496615|ref|NC_008601.1|	RefSeq	gene	596514	597620	.	-	.	ID=gene568;Name=perM;Dbxref=GeneID:4548475;gbkey=Gene;gene=perM;locus_tag=FTN_0570	588	520	0.439388	6.39334	0.0504901		0.439388	1.35603	0.132269
gi|118496615|ref|NC_008601.1|	RefSeq	gene	597722	599131	.	-	.	ID=gene569;Name=FTN_0571;Dbxref=GeneID:4548476;gbkey=Gene;locus_tag=FTN_0571	3632	2756	0.218593	8.4191	0.293356		0.218593	1.1636	0.065803
gi|118496615|ref|NC_008601.1|	RefSeq	gene	599215	600396	.	+	.	ID=gene570;Name=potF;Dbxref=GeneID:4548477;gbkey=Gene;gene=potF;locus_tag=FTN_0572	1689	929	-0.245605	7.14543	0.250482		-0.245605	0.843462	-0.0739346
gi|118496615|ref|NC_008601.1|	RefSeq	gene	600637	601452	.	-	.	ID=gene571;Name=FTN_0573;Dbxref=GeneID:4547263;gbkey=Gene;locus_tag=FTN_0573	686	559	0.321366	7.07992	0.147734		0.321366	1.24951	0.0967407
gi|118496615|ref|NC_008601.1|	RefSeq	gene	601671	602558	.	-	.	ID=gene572;Name=FTN_0574;Dbxref=GeneID:4547264;gbkey=Gene;locus_tag=FTN_0574	622	289	-0.488914	6.17516	0.0326919		-0.488914	0.712561	-0.147178
gi|118496615|ref|NC_008601.1|	RefSeq	gene	602712	603431	.	+	.	ID=gene573;Name=FTN_0575;Dbxref=GeneID:4547265;gbkey=Gene;locus_tag=FTN_0575	3794	3109	0.329509	8.25766	0.112646		0.329509	1.25659	0.099192
gi|118496615|ref|NC_008601.1|	RefSeq	gene	603499	604161	.	+	.	ID=gene574;Name=FTN_0576;Dbxref=GeneID:4547266;gbkey=Gene;locus_tag=FTN_0576	1253	680	-0.264955	6.85668	0.220853		-0.264955	0.832225	-0.0797594
gi|118496615|ref|NC_008601.1|	RefSeq	gene	604169	605971	.	+	.	ID=gene575;Name=mutL;Dbxref=GeneID:4547267;gbkey=Gene;gene=mutL;locus_tag=FTN_0577	3748	2334	-0.0665241	8.21736	0.750722		-0.0665241	0.954936	-0.0200257
gi|118496615|ref|NC_008601.1|	RefSeq	gene	606155	607378	.	+	.	ID=gene576;Name=FTN_0578;Dbxref=GeneID:4547268;gbkey=Gene;locus_tag=FTN_0578	901	510	-0.204203	6.84349	0.356423		-0.204203	0.868018	-0.0614714
gi|118496615|ref|NC_008601.1|	RefSeq	gene	607385	608659	.	-	.	ID=gene577;Name=FTN_0579;Dbxref=GeneID:4547269;gbkey=Gene;locus_tag=FTN_0579	815	333	-0.674329	6.34798	0.00291259		-0.674329	0.626624	-0.202993
gi|118496615|ref|NC_008601.1|	RefSeq	gene	608767	609717	.	-	.	ID=gene578;Name=trxB;Dbxref=GeneID:4547270;gbkey=Gene;gene=trxB;locus_tag=FTN_0580	5852	6244	0.710316	9.18891	0.000599621		0.710316	1.63616	0.213826
gi|118496615|ref|NC_008601.1|	RefSeq	gene	609808	611025	.	-	.	ID=gene579;Name=FTN_0581;Dbxref=GeneID:4547271;gbkey=Gene;locus_tag=FTN_0581	700	463	0.0204424	6.0458	0.936138		0.0204424	1.01427	0.00615379
gi|118496615|ref|NC_008601.1|	RefSeq	gene	611068	611742	.	-	.	ID=gene580;Name=gph;Dbxref=GeneID:4547272;gbkey=Gene;gene=gph;locus_tag=FTN_0582	381	215	-0.208576	5.3655	0.396941		-0.208576	0.865391	-0.0627875
gi|118496615|ref|NC_008601.1|	RefSeq	gene	611783	612709	.	-	.	ID=gene581;Name=FTN_0583;Dbxref=GeneID:4547273;gbkey=Gene;locus_tag=FTN_0583	205	140	0.0665445	4.50414	0.816653		0.0665445	1.04721	0.0200319
gi|118496615|ref|NC_008601.1|	RefSeq	gene	612820	613986	.	+	.	ID=gene582;Name=araJ;Dbxref=GeneID:4547274;gbkey=Gene;gene=araJ;locus_tag=FTN_0584	343	177	-0.337502	5.37909	0.17106		-0.337502	0.79141	-0.101598
gi|118496615|ref|NC_008601.1|	RefSeq	gene	614001	614723	.	-	.	ID=gene583;Name=cutC;Dbxref=GeneID:4547275;gbkey=Gene;gene=cutC;locus_tag=FTN_0585	582	271	-0.485787	5.51231	0.0363362		-0.485787	0.714108	-0.146236
gi|118496615|ref|NC_008601.1|	RefSeq	gene	615044	615562	.	+	.	ID=gene584;Name=FTN_0586;Dbxref=GeneID:4547276;gbkey=Gene;locus_tag=FTN_0586	753	369	-0.412144	5.71386	0.0672657		-0.412144	0.751506	-0.124068
gi|118496615|ref|NC_008601.1|	RefSeq	gene	615588	616817	.	+	.	ID=gene585;Name=FTN_0587;Dbxref=GeneID:4547277;gbkey=Gene;locus_tag=FTN_0587	6916	3500	-0.365784	8.6708	0.0770355		-0.365784	0.776047	-0.110112
gi|118496615|ref|NC_008601.1|	RefSeq	gene	616820	617740	.	-	.	ID=gene586;Name=FTN_0588;Dbxref=GeneID:4547278;gbkey=Gene;locus_tag=FTN_0588	1693	822	-0.425538	7.04726	0.0468664		-0.425538	0.744561	-0.1281
gi|118496615|ref|NC_008601.1|	RefSeq	gene	617744	619189	.	-	.	ID=gene587;Name=FTN_0589;Dbxref=GeneID:4547279;gbkey=Gene;locus_tag=FTN_0589	1013	427	-0.629419	6.44637	0.00452892		-0.629419	0.646437	-0.189474
gi|118496615|ref|NC_008601.1|	RefSeq	gene	620283	621503	.	+	.	ID=gene588;Name=FTN_0590;Dbxref=GeneID:4547280;gbkey=Gene;locus_tag=FTN_0590	11076	7745	0.100688	9.56843	0.624542		0.100688	1.07229	0.0303102
gi|118496615|ref|NC_008601.1|	RefSeq	gene	621627	622667	.	-	.	ID=gene589;Name=FTN_0591;Dbxref=GeneID:4548950;gbkey=Gene;locus_tag=FTN_0591	5637	2030	-0.856627	8.23338	4.14935e-05		-0.856627	0.552242	-0.25787
gi|118496615|ref|NC_008601.1|	RefSeq	gene	623051	623476	.	-	.	ID=gene590;Name=FTN_0592;Dbxref=GeneID:4548951;gbkey=Gene;locus_tag=FTN_0592	215	202	0.526498	5.86769	0.0347177		0.526498	1.44043	0.158492
gi|118496615|ref|NC_008601.1|	RefSeq	gene	623588	624460	.	-	.	ID=gene591;Name=sucD;Dbxref=GeneID:4548952;gbkey=Gene;gene=sucD;locus_tag=FTN_0593	11939	11335	0.541886	10.3115	0.00845538		0.541886	1.45587	0.163124
gi|118496615|ref|NC_008601.1|	RefSeq	gene	624492	625655	.	-	.	ID=gene592;Name=sucC;Dbxref=GeneID:4548953;gbkey=Gene;gene=sucC;locus_tag=FTN_0594	22411	19723	0.432459	11.0156	0.0350515		0.432459	1.34953	0.130183
gi|118496615|ref|NC_008601.1|	RefSeq	gene	625825	627741	.	+	.	ID=gene593;Name=FTN_0595;Dbxref=GeneID:4548954;gbkey=Gene;locus_tag=FTN_0595	9983	6110	-0.0915101	9.45203	0.656993		-0.0915101	0.93854	-0.0275473
gi|118496615|ref|NC_008601.1|	RefSeq	gene	627749	628633	.	-	.	ID=gene594;Name=FTN_0596;Dbxref=GeneID:4548955;gbkey=Gene;locus_tag=FTN_0596	1081	457	-0.625201	6.17632	0.00457572		-0.625201	0.648329	-0.188204
gi|118496615|ref|NC_008601.1|	RefSeq	gene	628731	629498	.	+	.	ID=gene595;Name=FTN_0597;Dbxref=GeneID:4548956;gbkey=Gene;locus_tag=FTN_0597	1735	737	-0.618342	6.99414	0.00397955		-0.618342	0.651419	-0.18614
gi|118496615|ref|NC_008601.1|	RefSeq	gene	629505	630488	.	-	.	ID=gene596;Name=FTN_0598;Dbxref=GeneID:4548957;gbkey=Gene;locus_tag=FTN_0598	1287	502	-0.741349	6.7644	0.000718173		-0.741349	0.59818	-0.223168
gi|118496615|ref|NC_008601.1|	RefSeq	gene	630522	631322	.	-	.	ID=gene597;Name=FTN_0599;Dbxref=GeneID:4548958;gbkey=Gene;locus_tag=FTN_0599	1262	320	-1.36251	6.42082	1.4496e-09		-1.36251	0.388906	-0.410155
gi|118496615|ref|NC_008601.1|	RefSeq	gene	631504	633915	.	+	.	ID=gene598;Name=gyrB;Dbxref=GeneID:4548959;gbkey=Gene;gene=gyrB;locus_tag=FTN_0600	52860	28285	-0.285349	11.6636	0.163426		-0.285349	0.820543	-0.0858985
gi|118496615|ref|NC_008601.1|	RefSeq	gene	634045	634908	.	+	.	ID=gene599;Name=FTN_0601;Dbxref=GeneID:4548960;gbkey=Gene;locus_tag=FTN_0601	16401	7242	-0.562528	9.96096	0.00630709		-0.562528	0.677115	-0.169338
gi|118496615|ref|NC_008601.1|	RefSeq	gene	634911	635450	.	+	.	ID=gene600;Name=FTN_0602;Dbxref=GeneID:4548961;gbkey=Gene;locus_tag=FTN_0602	6846	3555	-0.328614	8.82932	0.112107		-0.328614	0.796301	-0.0989227
gi|118496615|ref|NC_008601.1|	RefSeq	gene	635459	636283	.	-	.	ID=gene601;Name=mutM;Dbxref=GeneID:4548962;gbkey=Gene;gene=mutM;locus_tag=FTN_0603	538	357	0.0251005	6.28697	0.918885		0.0251005	1.01755	0.00755599
gi|118496615|ref|NC_008601.1|	RefSeq	gene	636377	638476	.	+	.	ID=gene602;Name=FTN_0604;Dbxref=GeneID:4548963;gbkey=Gene;locus_tag=FTN_0604	7481	4958	0.0233162	9.3969	0.910759		0.0233162	1.01629	0.00701889
gi|118496615|ref|NC_008601.1|	RefSeq	gene	638482	639399	.	+	.	ID=gene603;Name=mraW;Dbxref=GeneID:4548964;gbkey=Gene;gene=mraW;locus_tag=FTN_0605	2325	1423	-0.0914993	7.80809	0.665886		-0.0914993	0.938547	-0.027544
gi|118496615|ref|NC_008601.1|	RefSeq	gene	639396	639746	.	+	.	ID=gene604;Name=FTN_0606;Dbxref=GeneID:4548965;gbkey=Gene;locus_tag=FTN_0606	1369	849	-0.0724882	6.82961	0.739483		-0.0724882	0.950996	-0.0218211
gi|118496615|ref|NC_008601.1|	RefSeq	gene	639739	641433	.	+	.	ID=gene605;Name=ftsI;Dbxref=GeneID:4548966;gbkey=Gene;gene=ftsI;locus_tag=FTN_0607	4123	2590	-0.0539508	8.63159	0.796536		-0.0539508	0.963295	-0.0162408
gi|118496615|ref|NC_008601.1|	RefSeq	gene	641539	641805	.	+	.	ID=gene606;Name=rpsO;Dbxref=GeneID:4548967;gbkey=Gene;gene=rpsO;locus_tag=FTN_0608	6280	3271	-0.324234	9.40345	0.117327		-0.324234	0.798722	-0.0976043
gi|118496615|ref|NC_008601.1|	RefSeq	gene	641862	643943	.	+	.	ID=gene607;Name=pnp;Dbxref=GeneID:4548968;gbkey=Gene;gene=pnp;locus_tag=FTN_0609	91396	68733	0.205661	12.9738	0.31461		0.205661	1.15321	0.0619102
gi|118496615|ref|NC_008601.1|	RefSeq	gene	643949	644299	.	+	.	ID=gene608;Name=FTN_0610;Dbxref=GeneID:4548969;gbkey=Gene;locus_tag=FTN_0610	4869	3168	-0.0032635	8.95631	0.988884		-0.0032635	0.99774	-0.000982413
gi|118496615|ref|NC_008601.1|	RefSeq	gene	644330	645157	.	+	.	ID=gene609;Name=kdsA;Dbxref=GeneID:4548188;gbkey=Gene;gene=kdsA;locus_tag=FTN_0611	4715	1973	-0.640051	9.17182	0.00216689		-0.640051	0.64169	-0.192675
gi|118496615|ref|NC_008601.1|	RefSeq	gene	645168	645833	.	+	.	ID=gene610;Name=udk;Dbxref=GeneID:4548189;gbkey=Gene;gene=udk;locus_tag=FTN_0612	4692	1896	-0.690426	8.64504	0.000951566		-0.690426	0.619671	-0.207839
gi|118496615|ref|NC_008601.1|	RefSeq	gene	645826	646044	.	+	.	ID=gene611;Name=rpoZ;Dbxref=GeneID:4548190;gbkey=Gene;gene=rpoZ;locus_tag=FTN_0613	2100	827	-0.727572	7.33554	0.000658673		-0.727572	0.603919	-0.219021
gi|118496615|ref|NC_008601.1|	RefSeq	gene	646111	646186	.	-	.	ID=gene612;Name=FTN_0614;Dbxref=GeneID:4548191;gbkey=Gene;locus_tag=FTN_0614	195	134	0.0754914	4.94055	0.783376		0.0754914	1.05372	0.0227252
gi|118496615|ref|NC_008601.1|	RefSeq	gene	646311	646883	.	+	.	ID=gene613;Name=FTN_0615;Dbxref=GeneID:4548192;gbkey=Gene;locus_tag=FTN_0615	492	332	0.0492996	6.45453	0.83877		0.0492996	1.03476	0.0148407
gi|118496615|ref|NC_008601.1|	RefSeq	gene	646972	648321	.	+	.	ID=gene614;Name=rumA;Dbxref=GeneID:4548193;gbkey=Gene;gene=rumA;locus_tag=FTN_0616	1818	1157	-0.0351708	8.11793	0.871697		-0.0351708	0.975916	-0.0105875
gi|118496615|ref|NC_008601.1|	RefSeq	gene	648331	649296	.	+	.	ID=gene615;Name=FTN_0617;Dbxref=GeneID:4548194;gbkey=Gene;locus_tag=FTN_0617	1363	965	0.118592	7.65989	0.581889		0.118592	1.08567	0.0356998
gi|118496615|ref|NC_008601.1|	RefSeq	gene	649296	650243	.	+	.	ID=gene616;Name=FTN_0618;Dbxref=GeneID:4548195;gbkey=Gene;locus_tag=FTN_0618	874	572	0.00517053	7.28395	0.99254		0.00517053	1.00359	0.00155649
gi|118496615|ref|NC_008601.1|	RefSeq	gene	650233	651024	.	+	.	ID=gene617;Name=FTN_0619;Note=stop codon;Dbxref=GeneID:4548196;gbkey=Gene;locus_tag=FTN_0619;pseudo=true	281	167	-0.133857	6.04948	0.608825		-0.133857	0.911392	-0.040295
gi|118496615|ref|NC_008601.1|	RefSeq	gene	651130	652368	.	+	.	ID=gene618;Name=FTN_0620;Dbxref=GeneID:4548197;gbkey=Gene;locus_tag=FTN_0620	816	499	-0.092722	7.08053	0.68073		-0.092722	0.937752	-0.0279121
gi|118496615|ref|NC_008601.1|	RefSeq	gene	652477	653847	.	+	.	ID=gene619;Name=eno;Dbxref=GeneID:4548198;gbkey=Gene;gene=eno;locus_tag=FTN_0621	21679	10268	-0.46135	10.6003	0.0247481		-0.46135	0.726306	-0.13888
gi|118496615|ref|NC_008601.1|	RefSeq	gene	653855	654145	.	+	.	ID=gene620;Name=ftsB;Dbxref=GeneID:4548199;gbkey=Gene;gene=ftsB;locus_tag=FTN_0622	3037	1708	-0.213538	7.81278	0.308322		-0.213538	0.86242	-0.0642813
gi|118496615|ref|NC_008601.1|	RefSeq	gene	654135	654824	.	+	.	ID=gene621;Name=ispD;Dbxref=GeneID:4548200;gbkey=Gene;gene=ispD;locus_tag=FTN_0623	3054	1890	-0.0755204	8.08288	0.719581		-0.0755204	0.949	-0.0227339
gi|118496615|ref|NC_008601.1|	RefSeq	gene	654829	656091	.	-	.	ID=gene622;Name=FTN_0624;Dbxref=GeneID:4548201;gbkey=Gene;locus_tag=FTN_0624	1497	909	-0.102922	7.48938	0.63344		-0.102922	0.931145	-0.0309825
gi|118496615|ref|NC_008601.1|	RefSeq	gene	656093	657148	.	-	.	ID=gene623;Name=tdh;Dbxref=GeneID:4548202;gbkey=Gene;gene=tdh;locus_tag=FTN_0625	2915	1556	-0.288848	7.9104	0.168739		-0.288848	0.818556	-0.0869518
gi|118496615|ref|NC_008601.1|	RefSeq	gene	657171	658367	.	-	.	ID=gene624;Name=kbl;Dbxref=GeneID:4548203;gbkey=Gene;gene=kbl;locus_tag=FTN_0626	4972	2026	-0.678376	8.32689	0.00115121		-0.678376	0.624868	-0.204212
gi|118496615|ref|NC_008601.1|	RefSeq	gene	658901	661513	.	+	.	ID=gene625;Name=chiA;Dbxref=GeneID:4548204;gbkey=Gene;gene=chiA;locus_tag=FTN_0627	9195	6552	0.127873	9.59977	0.534641		0.127873	1.09268	0.0384937
gi|118496615|ref|NC_008601.1|	RefSeq	gene	661707	662336	.	+	.	ID=gene626;Name=upp;Dbxref=GeneID:4548205;gbkey=Gene;gene=upp;locus_tag=FTN_0628	1268	835	0.0140812	6.93073	0.952616		0.0140812	1.00981	0.00423888
gi|118496615|ref|NC_008601.1|	RefSeq	gene	662421	663254	.	+	.	ID=gene627;Name=purU;Dbxref=GeneID:4547943;gbkey=Gene;gene=purU;locus_tag=FTN_0629	4024	1396	-0.910494	7.95504	1.52553e-05		-0.910494	0.532003	-0.274086
gi|118496615|ref|NC_008601.1|	RefSeq	gene	663345	663689	.	+	.	ID=gene628;Name=FTN_0630;Dbxref=GeneID:4547944;gbkey=Gene;locus_tag=FTN_0630	651	337	-0.333032	5.75546	0.14143		-0.333032	0.793866	-0.100253
gi|118496615|ref|NC_008601.1|	RefSeq	gene	663750	664970	.	+	.	ID=gene629;Name=FTN_0631;Dbxref=GeneID:4547945;gbkey=Gene;locus_tag=FTN_0631	564	270	-0.445806	6.56229	0.0549877		-0.445806	0.734174	-0.134201
gi|118496615|ref|NC_008601.1|	RefSeq	gene	664954	666279	.	-	.	ID=gene630;Name=FTN_0632;Dbxref=GeneID:4547946;gbkey=Gene;locus_tag=FTN_0632	2389	846	-0.880811	7.61243	3.67483e-05		-0.880811	0.543062	-0.26515
gi|118496615|ref|NC_008601.1|	RefSeq	gene	666383	668602	.	-	.	ID=gene631;Name=katG;Dbxref=GeneID:4547947;gbkey=Gene;gene=katG;locus_tag=FTN_0633	2652	1913	0.145538	10.0324	0.487796		0.145538	1.10614	0.0438112
gi|118496615|ref|NC_008601.1|	RefSeq	gene	668807	669595	.	-	.	ID=gene632;Name=FTN_0634;Dbxref=GeneID:4547948;gbkey=Gene;locus_tag=FTN_0634	555	273	-0.406669	5.50685	0.0798358		-0.406669	0.754363	-0.12242
gi|118496615|ref|NC_008601.1|	RefSeq	gene	669589	670983	.	-	.	ID=gene633;Name=FTN_0635;Dbxref=GeneID:4547949;gbkey=Gene;locus_tag=FTN_0635	1801	627	-0.905365	7.06615	2.92179e-05		-0.905365	0.533897	-0.272542
gi|118496615|ref|NC_008601.1|	RefSeq	gene	670999	672315	.	-	.	ID=gene634;Name=glpT;Dbxref=GeneID:4547950;gbkey=Gene;gene=glpT;locus_tag=FTN_0636	1575	866	-0.246098	7.61945	0.251006		-0.246098	0.843174	-0.0740827
gi|118496615|ref|NC_008601.1|	RefSeq	gene	673286	674314	.	-	.	ID=gene635;Name=ugpQ;Dbxref=GeneID:4547951;gbkey=Gene;gene=ugpQ;locus_tag=FTN_0637	12430	3097	-1.38807	9.1079	3.68145e-11		-1.38807	0.382077	-0.417849
gi|118496615|ref|NC_008601.1|	RefSeq	gene	674546	676090	.	+	.	ID=gene636;Name=FTN_0638;Dbxref=GeneID:4547952;gbkey=Gene;locus_tag=FTN_0638	1432	826	-0.177008	6.92572	0.411434		-0.177008	0.884535	-0.0532848
gi|118496615|ref|NC_008601.1|	RefSeq	gene	676090	676470	.	+	.	ID=gene637;Name=FTN_0639;Dbxref=GeneID:4547953;gbkey=Gene;locus_tag=FTN_0639	1460	793	-0.263756	6.60709	0.220273		-0.263756	0.832917	-0.0793985
gi|118496615|ref|NC_008601.1|	RefSeq	gene	676608	677858	.	+	.	ID=gene638;Name=dctA;Dbxref=GeneID:4547954;gbkey=Gene;gene=dctA;locus_tag=FTN_0640	1335	558	-0.641622	6.57561	0.00320952		-0.641622	0.640992	-0.193147
gi|118496615|ref|NC_008601.1|	RefSeq	gene	677860	679509	.	-	.	ID=gene639;Name=cydC;Dbxref=GeneID:4547955;gbkey=Gene;gene=cydC;locus_tag=FTN_0641	1338	887	0.0237148	6.86893	0.916365		0.0237148	1.01657	0.00713886
gi|118496615|ref|NC_008601.1|	RefSeq	gene	679506	681287	.	-	.	ID=gene640;Name=cydD;Dbxref=GeneID:4547956;gbkey=Gene;gene=cydD;locus_tag=FTN_0642	1048	637	-0.101469	6.5832	0.642175		-0.101469	0.932084	-0.0305451
gi|118496615|ref|NC_008601.1|	RefSeq	gene	681664	682173	.	+	.	ID=gene641;Name=FTN_0643;Dbxref=GeneID:4547957;gbkey=Gene;locus_tag=FTN_0643	37960	15201	-0.703521	10.8945	0.000627683		-0.703521	0.614072	-0.211781
gi|118496615|ref|NC_008601.1|	RefSeq	gene	682201	682401	.	+	.	ID=gene642;Name=FTN_0644;Dbxref=GeneID:4547958;gbkey=Gene;locus_tag=FTN_0644	8107	2058	-1.36109	8.51064	1.01278e-10		-1.36109	0.389287	-0.40973
gi|118496615|ref|NC_008601.1|	RefSeq	gene	682405	683664	.	-	.	ID=gene643;Name=FTN_0645;Dbxref=GeneID:4547959;gbkey=Gene;locus_tag=FTN_0645	6559	1945	-1.13688	8.43026	6.05318e-08		-1.13688	0.454743	-0.342234
gi|118496615|ref|NC_008601.1|	RefSeq	gene	683742	684641	.	-	.	ID=gene644;Name=cscK;Dbxref=GeneID:4547960;gbkey=Gene;gene=cscK;locus_tag=FTN_0646	857	543	-0.041546	6.44338	0.861902		-0.041546	0.971613	-0.0125066
gi|118496615|ref|NC_008601.1|	RefSeq	gene	684751	686031	.	-	.	ID=gene645;Name=serS;Dbxref=GeneID:4547961;gbkey=Gene;gene=serS;locus_tag=FTN_0647	9429	4102	-0.583976	9.03281	0.00473774		-0.583976	0.667123	-0.175794
gi|118496615|ref|NC_008601.1|	RefSeq	gene	686046	687584	.	-	.	ID=gene646;Name=gpmI;Dbxref=GeneID:4547871;gbkey=Gene;gene=gpmI;locus_tag=FTN_0648	16810	6787	-0.691676	9.86918	0.000799509		-0.691676	0.619134	-0.208215
gi|118496615|ref|NC_008601.1|	RefSeq	gene	687803	690835	.	+	.	ID=gene647;Name=FTN_0649;Dbxref=GeneID:4547872;gbkey=Gene;locus_tag=FTN_0649	13413	6665	-0.392161	9.80863	0.0567092		-0.392161	0.761988	-0.118052
gi|118496615|ref|NC_008601.1|	RefSeq	gene	690857	690932	.	-	.	ID=gene648;Name=FTN_0650;Dbxref=GeneID:4547873;gbkey=Gene;locus_tag=FTN_0650	101	39	-0.754534	3.4601	0.028756		-0.754534	0.592738	-0.227137
gi|118496615|ref|NC_008601.1|	RefSeq	gene	691032	691433	.	-	.	ID=gene649;Name=cdd;Dbxref=GeneID:4547874;gbkey=Gene;gene=cdd;locus_tag=FTN_0651	595	240	-0.69284	6.87025	0.00297883		-0.69284	0.618635	-0.208565
gi|118496615|ref|NC_008601.1|	RefSeq	gene	691454	692257	.	-	.	ID=gene650;Name=udp;Dbxref=GeneID:4547875;gbkey=Gene;gene=udp;locus_tag=FTN_0652	2349	846	-0.856452	7.82343	5.99345e-05		-0.856452	0.552309	-0.257818
gi|118496615|ref|NC_008601.1|	RefSeq	gene	692373	692984	.	+	.	ID=gene651;Name=miaE;Dbxref=GeneID:4547876;gbkey=Gene;gene=miaE;locus_tag=FTN_0653	412	187	-0.522585	6.70164	0.031193		-0.522585	0.696123	-0.157314
gi|118496615|ref|NC_008601.1|	RefSeq	gene	693036	693686	.	-	.	ID=gene652;Name=FTN_0654;Dbxref=GeneID:4547877;gbkey=Gene;locus_tag=FTN_0654	424	188	-0.5563	6.51093	0.020798		-0.5563	0.680044	-0.167463
gi|118496615|ref|NC_008601.1|	RefSeq	gene	693720	694298	.	-	.	ID=gene653;Name=FTN_0655;Dbxref=GeneID:4547878;gbkey=Gene;locus_tag=FTN_0655	821	264	-1.01978	6.45891	8.81622e-06		-1.01978	0.493191	-0.306985
gi|118496615|ref|NC_008601.1|	RefSeq	gene	694299	695522	.	-	.	ID=gene654;Name=FTN_0656;Dbxref=GeneID:4547879;gbkey=Gene;locus_tag=FTN_0656	1711	636	-0.810855	7.72596	0.000175227		-0.810855	0.570044	-0.244092
gi|118496615|ref|NC_008601.1|	RefSeq	gene	695529	696782	.	-	.	ID=gene655;Name=FTN_0657;Dbxref=GeneID:4547880;gbkey=Gene;locus_tag=FTN_0657	2237	814	-0.841598	7.57728	8.21454e-05		-0.841598	0.558025	-0.253346
gi|118496615|ref|NC_008601.1|	RefSeq	gene	696790	697851	.	-	.	ID=gene656;Name=FTN_0658;Dbxref=GeneID:4547881;gbkey=Gene;locus_tag=FTN_0658	902	476	-0.305319	6.7491	0.170897		-0.305319	0.809263	-0.0919103
gi|118496615|ref|NC_008601.1|	RefSeq	gene	697851	698933	.	-	.	ID=gene657;Name=FTN_0659;Dbxref=GeneID:4547882;gbkey=Gene;locus_tag=FTN_0659	949	411	-0.590364	6.52872	0.00799272		-0.590364	0.664175	-0.177717
gi|118496615|ref|NC_008601.1|	RefSeq	gene	699099	700538	.	+	.	ID=gene658;Name=pepA;Dbxref=GeneID:4547883;gbkey=Gene;gene=pepA;locus_tag=FTN_0660	23426	10259	-0.574426	10.5821	0.00522367		-0.574426	0.671553	-0.17292
gi|118496615|ref|NC_008601.1|	RefSeq	gene	700640	702100	.	+	.	ID=gene659;Name=guaB;Dbxref=GeneID:4547884;gbkey=Gene;gene=guaB;locus_tag=FTN_0661	13824	24765	1.45791	11.1379	3.01008e-12		1.45791	2.7471	0.438874
gi|118496615|ref|NC_008601.1|	RefSeq	gene	702166	702819	.	+	.	ID=gene660;Name=FTN_0662;Dbxref=GeneID:4547885;gbkey=Gene;locus_tag=FTN_0662	1065	1237	0.832692	7.53935	0.000104246		0.832692	1.78101	0.250665
gi|118496615|ref|NC_008601.1|	RefSeq	gene	702806	704428	.	+	.	ID=gene661;Name=pgi;Dbxref=GeneID:4547886;gbkey=Gene;gene=pgi;locus_tag=FTN_0663	6128	3881	-0.0421972	9.44024	0.839186		-0.0421972	0.971175	-0.0127026
gi|118496615|ref|NC_008601.1|	RefSeq	gene	704429	705013	.	+	.	ID=gene662;Name=fimT;Dbxref=GeneID:4547887;gbkey=Gene;gene=fimT;locus_tag=FTN_0664	5852	4420	0.211901	9.13368	0.305185		0.211901	1.15821	0.0637886
gi|118496615|ref|NC_008601.1|	RefSeq	gene	705047	705529	.	+	.	ID=gene663;Name=greA;Dbxref=GeneID:4547888;gbkey=Gene;gene=greA;locus_tag=FTN_0665	3043	1379	-0.525051	8.38795	0.0125218		-0.525051	0.694935	-0.158056
gi|118496615|ref|NC_008601.1|	RefSeq	gene	705568	708390	.	+	.	ID=gene664;Name=uvrA;Dbxref=GeneID:4548057;gbkey=Gene;gene=uvrA;locus_tag=FTN_0666	5933	3192	-0.277504	9.46157	0.180294		-0.277504	0.825017	-0.083537
gi|118496615|ref|NC_008601.1|	RefSeq	gene	708396	709784	.	-	.	ID=gene665;Name=FTN_0667;Dbxref=GeneID:4548058;gbkey=Gene;locus_tag=FTN_0667	998	544	-0.258601	7.38898	0.240407		-0.258601	0.835898	-0.0778466
gi|118496615|ref|NC_008601.1|	RefSeq	gene	709997	711943	.	+	.	ID=gene666;Name=hflB;Dbxref=GeneID:4548059;gbkey=Gene;gene=hflB;locus_tag=FTN_0668	5110	2916	-0.192537	9.71768	0.353448		-0.192537	0.875066	-0.0579594
gi|118496615|ref|NC_008601.1|	RefSeq	gene	712184	712906	.	+	.	ID=gene667;Name=deoD;Dbxref=GeneID:4548060;gbkey=Gene;gene=deoD;locus_tag=FTN_0669	5933	3627	-0.093193	8.98826	0.652984		-0.093193	0.937446	-0.0280539
gi|118496615|ref|NC_008601.1|	RefSeq	gene	712903	713352	.	-	.	ID=gene668;Name=FTN_0670;Dbxref=GeneID:4548061;gbkey=Gene;locus_tag=FTN_0670	262	155	-0.140424	6.2181	0.586823		-0.140424	0.907253	-0.0422718
gi|118496615|ref|NC_008601.1|	RefSeq	gene	713356	714384	.	-	.	ID=gene669;Name=FTN_0671;Dbxref=GeneID:4548062;gbkey=Gene;locus_tag=FTN_0671	440	222	-0.370009	6.2971	0.122721		-0.370009	0.773778	-0.111384
gi|118496615|ref|NC_008601.1|	RefSeq	gene	714516	717236	.	+	.	ID=gene670;Name=secA;Dbxref=GeneID:4548063;gbkey=Gene;gene=secA;gene_synonym=azi,div;locus_tag=FTN_0672	18531	11574	-0.0622631	10.608	0.761725		-0.0622631	0.957761	-0.0187431
gi|118496615|ref|NC_008601.1|	RefSeq	gene	717345	717911	.	+	.	ID=gene671;Name=tag;Dbxref=GeneID:4548064;gbkey=Gene;gene=tag;locus_tag=FTN_0673	1275	604	-0.461023	6.70916	0.0342273		-0.461023	0.726471	-0.138782
gi|118496615|ref|NC_008601.1|	RefSeq	gene	717903	719030	.	-	.	ID=gene672;Name=glxK;Dbxref=GeneID:4548065;gbkey=Gene;gene=glxK;locus_tag=FTN_0674	554	396	0.132369	6.53136	0.56531		0.132369	1.09609	0.0398472
gi|118496615|ref|NC_008601.1|	RefSeq	gene	719301	719615	.	+	.	ID=gene673;Name=rplU;Dbxref=GeneID:4548066;gbkey=Gene;gene=rplU;locus_tag=FTN_0675	6248	5597	0.458039	10.4529	0.0265554		0.458039	1.37367	0.137884
gi|118496615|ref|NC_008601.1|	RefSeq	gene	719646	719900	.	+	.	ID=gene674;Name=rpmA;Dbxref=GeneID:4548067;gbkey=Gene;gene=rpmA;locus_tag=FTN_0676	2727	2563	0.527284	10.3283	0.0115609		0.527284	1.44121	0.158728
gi|118496615|ref|NC_008601.1|	RefSeq	gene	721006	721383	.	+	.	ID=gene675;Name=FTN_0677;Dbxref=GeneID:4548068;gbkey=Gene;locus_tag=FTN_0677	1054	417	-0.720832	6.36947	0.00117327		-0.720832	0.606748	-0.216992
gi|118496615|ref|NC_008601.1|	RefSeq	gene	721380	722594	.	-	.	ID=gene676;Name=FTN_0678;Dbxref=GeneID:4548069;gbkey=Gene;locus_tag=FTN_0678	4984	3377	0.055226	8.70179	0.790706		0.055226	1.03902	0.0166247
gi|118496615|ref|NC_008601.1|	RefSeq	gene	722623	723717	.	-	.	ID=gene677;Name=rnd;Dbxref=GeneID:4548070;gbkey=Gene;gene=rnd;locus_tag=FTN_0679	767	398	-0.329596	6.36001	0.143405		-0.329596	0.79576	-0.0992181
gi|118496615|ref|NC_008601.1|	RefSeq	gene	723838	725676	.	+	.	ID=gene678;Name=uvrC;Dbxref=GeneID:4548071;gbkey=Gene;gene=uvrC;locus_tag=FTN_0680	1287	920	0.132468	7.24832	0.539169		0.132468	1.09617	0.039877
gi|118496615|ref|NC_008601.1|	RefSeq	gene	725743	726369	.	+	.	ID=gene679;Name=FTN_0681;Dbxref=GeneID:4548072;gbkey=Gene;locus_tag=FTN_0681	136	135	0.605592	4.84733	0.0275998		0.605592	1.5216	0.182301
gi|118496615|ref|NC_008601.1|	RefSeq	gene	726759	726947	.	+	.	ID=gene680;Name=FTN_0682;Dbxref=GeneID:4548073;gbkey=Gene;locus_tag=FTN_0682	1092	269	-1.40418	5.87859	7.74972e-10		-1.40418	0.377834	-0.422699
gi|118496615|ref|NC_008601.1|	RefSeq	gene	726940	727692	.	+	.	ID=gene681;Name=kdsB;Dbxref=GeneID:4548074;gbkey=Gene;gene=kdsB;locus_tag=FTN_0683	2741	798	-1.16335	7.38564	5.55009e-08		-1.16335	0.446474	-0.350204
gi|118496615|ref|NC_008601.1|	RefSeq	gene	727685	728080	.	+	.	ID=gene682;Name=FTN_0684;Dbxref=GeneID:4548075;gbkey=Gene;locus_tag=FTN_0684	1384	520	-0.795355	6.52615	0.000277329		-0.795355	0.576201	-0.239426
gi|118496615|ref|NC_008601.1|	RefSeq	gene	728077	729225	.	-	.	ID=gene683;Name=galK;Dbxref=GeneID:4547301;gbkey=Gene;gene=galK;locus_tag=FTN_0685	2508	1418	-0.205877	7.65285	0.328531		-0.205877	0.867012	-0.0619751
gi|118496615|ref|NC_008601.1|	RefSeq	gene	729228	730253	.	-	.	ID=gene684;Name=galT;Dbxref=GeneID:4547302;gbkey=Gene;gene=galT;locus_tag=FTN_0686	3064	1919	-0.0582691	7.9345	0.782228		-0.0582691	0.960416	-0.0175407
gi|118496615|ref|NC_008601.1|	RefSeq	gene	730344	731726	.	+	.	ID=gene685;Name=galP1;Dbxref=GeneID:4547303;gbkey=Gene;gene=galP1;locus_tag=FTN_0687	2027	741	-0.834927	7.50307	9.91208e-05		-0.834927	0.560612	-0.251338
gi|118496615|ref|NC_008601.1|	RefSeq	gene	731758	733152	.	+	.	ID=gene686;Name=galP2;Dbxref=GeneID:4547304;gbkey=Gene;gene=galP2;locus_tag=FTN_0688	7879	3375	-0.606321	8.83715	0.00342788		-0.606321	0.65687	-0.182521
gi|118496615|ref|NC_008601.1|	RefSeq	gene	733247	733525	.	+	.	ID=gene687;Name=ppiC;Dbxref=GeneID:4547305;gbkey=Gene;gene=ppiC;locus_tag=FTN_0689	130951	106770	0.322268	13.1405	0.115209		0.322268	1.25029	0.0970125
gi|118496615|ref|NC_008601.1|	RefSeq	gene	733590	735299	.	+	.	ID=gene688;Name=deaD;Dbxref=GeneID:4547306;gbkey=Gene;gene=deaD;locus_tag=FTN_0690	52426	29659	-0.205022	11.7536	0.316488		-0.205022	0.867525	-0.0617179
gi|118496615|ref|NC_008601.1|	RefSeq	gene	735416	735988	.	+	.	ID=gene689;Name=gmk;Dbxref=GeneID:4547307;gbkey=Gene;gene=gmk;locus_tag=FTN_0691	1564	1057	0.0515195	8.29108	0.812162		0.0515195	1.03636	0.0155089
gi|118496615|ref|NC_008601.1|	RefSeq	gene	736009	737034	.	+	.	ID=gene690;Name=nadA;Dbxref=GeneID:4547308;gbkey=Gene;gene=nadA;locus_tag=FTN_0692	3764	3724	0.601356	9.74776	0.00380035		0.601356	1.51714	0.181026
gi|118496615|ref|NC_008601.1|	RefSeq	gene	737043	737906	.	+	.	ID=gene691;Name=nadC;Dbxref=GeneID:4547309;gbkey=Gene;gene=nadC;locus_tag=FTN_0693	2782	3346	0.883069	9.04565	2.40159e-05		0.883069	1.84429	0.26583
gi|118496615|ref|NC_008601.1|	RefSeq	gene	737909	739396	.	+	.	ID=gene692;Name=nadB;Dbxref=GeneID:4547310;gbkey=Gene;gene=nadB;locus_tag=FTN_0694	1755	1442	0.333364	8.63573	0.114774		0.333364	1.25995	0.100353
gi|118496615|ref|NC_008601.1|	RefSeq	gene	739415	740455	.	+	.	ID=gene693;Name=add;Dbxref=GeneID:4547311;gbkey=Gene;gene=add;locus_tag=FTN_0695	1599	1862	0.836413	8.1254	7.60327e-05		0.836413	1.7856	0.251785
gi|118496615|ref|NC_008601.1|	RefSeq	gene	740450	741076	.	-	.	ID=gene694;Name=FTN_0696;Dbxref=GeneID:4547312;gbkey=Gene;locus_tag=FTN_0696	205	104	-0.361947	6.03466	0.196014		-0.361947	0.778114	-0.108957
gi|118496615|ref|NC_008601.1|	RefSeq	gene	741230	741520	.	+	.	ID=gene695;Name=FTN_0697;Dbxref=GeneID:4547313;gbkey=Gene;locus_tag=FTN_0697	979	616	-0.0515808	6.43767	0.817311		-0.0515808	0.964878	-0.0155274
gi|118496615|ref|NC_008601.1|	RefSeq	gene	741553	742023	.	+	.	ID=gene696;Name=FTN_0698;Dbxref=GeneID:4547314;gbkey=Gene;locus_tag=FTN_0698	1866	976	-0.318178	7.21966	0.135123		-0.318178	0.802082	-0.095781
gi|118496615|ref|NC_008601.1|	RefSeq	gene	742065	743231	.	+	.	ID=gene697;Name=FTN_0699;Dbxref=GeneID:4547315;gbkey=Gene;locus_tag=FTN_0699	2203	1225	-0.229881	7.75754	0.277227		-0.229881	0.852705	-0.0692011
gi|118496615|ref|NC_008601.1|	RefSeq	gene	743228	744298	.	+	.	ID=gene698;Name=FTN_0700;Dbxref=GeneID:4547316;gbkey=Gene;locus_tag=FTN_0700	1802	851	-0.465532	7.38787	0.0293663		-0.465532	0.724204	-0.140139
gi|118496615|ref|NC_008601.1|	RefSeq	gene	744311	744958	.	+	.	ID=gene699;Name=FTN_0701;Dbxref=GeneID:4547317;gbkey=Gene;locus_tag=FTN_0701	365	233	-0.0307641	5.83935	0.916877		-0.0307641	0.978902	-0.0092609
gi|118496615|ref|NC_008601.1|	RefSeq	gene	745266	746768	.	+	.	ID=gene700;Name=FTN_0702;Dbxref=GeneID:4547318;gbkey=Gene;locus_tag=FTN_0702	763	440	-0.177353	6.83387	0.431927		-0.177353	0.884324	-0.0533884
gi|118496615|ref|NC_008601.1|	RefSeq	gene	746848	747420	.	+	.	ID=gene701;Name=FTN_0703;Dbxref=GeneID:4547319;gbkey=Gene;locus_tag=FTN_0703	510	405	0.284138	6.48718	0.211029		0.284138	1.21768	0.085534
gi|118496615|ref|NC_008601.1|	RefSeq	gene	747676	749163	.	+	.	ID=gene702;Name=FTN_0704;Dbxref=GeneID:4548780;gbkey=Gene;locus_tag=FTN_0704	1979	1111	-0.216105	8.41586	0.308886		-0.216105	0.860886	-0.0650542
gi|118496615|ref|NC_008601.1|	RefSeq	gene	749168	750079	.	+	.	ID=gene703;Name=FTN_0705;Dbxref=GeneID:4548781;gbkey=Gene;locus_tag=FTN_0705	907	726	0.295612	7.18662	0.176219		0.295612	1.22741	0.0889881
gi|118496615|ref|NC_008601.1|	RefSeq	gene	750173	750676	.	+	.	ID=gene704;Name=FTN_0706;Dbxref=GeneID:4548782;gbkey=Gene;locus_tag=FTN_0706	944	612	-0.00846429	6.24567	0.979093		-0.00846429	0.99415	-0.002548
gi|118496615|ref|NC_008601.1|	RefSeq	gene	750859	752079	.	+	.	ID=gene705;Name=FTN_0707;Dbxref=GeneID:4548783;gbkey=Gene;locus_tag=FTN_0707	1251	1270	0.638474	7.34525	0.00274328		0.638474	1.55668	0.1922
gi|118496615|ref|NC_008601.1|	RefSeq	gene	752105	752350	.	+	.	ID=gene706;Name=FTN_0708;Dbxref=GeneID:4548784;gbkey=Gene;locus_tag=FTN_0708	284	223	0.267812	4.88487	0.285259		0.267812	1.20398	0.0806195
gi|118496615|ref|NC_008601.1|	RefSeq	gene	752359	753105	.	+	.	ID=gene707;Name=FTN_0709;Dbxref=GeneID:4548785;gbkey=Gene;locus_tag=FTN_0709	507	234	-0.49851	5.49548	0.033635		-0.49851	0.707837	-0.150066
gi|118496615|ref|NC_008601.1|	RefSeq	gene	753221	756331	.	+	.	ID=gene708;Name=FTN_0710;Dbxref=GeneID:4548786;gbkey=Gene;locus_tag=FTN_0710	6163	3581	-0.166476	8.88036	0.421189		-0.166476	0.891016	-0.0501144
gi|118496615|ref|NC_008601.1|	RefSeq	gene	756324	756983	.	+	.	ID=gene709;Name=FTN_0711;Dbxref=GeneID:4548787;gbkey=Gene;locus_tag=FTN_0711	346	219	-0.0430325	5.52024	0.877656		-0.0430325	0.970613	-0.0129541
gi|118496615|ref|NC_008601.1|	RefSeq	gene	757042	757410	.	-	.	ID=gene710;Name=hslR;Dbxref=GeneID:4548788;gbkey=Gene;gene=hslR;locus_tag=FTN_0712	268	205	0.23006	5.20152	0.363509		0.23006	1.17288	0.0692551
gi|118496615|ref|NC_008601.1|	RefSeq	gene	757650	760250	.	-	.	ID=gene711;Name=ostA2;Dbxref=GeneID:4548789;gbkey=Gene;gene=ostA2;locus_tag=FTN_0713	4123	3468	0.367187	9.53454	0.0767052		0.367187	1.28984	0.110534
gi|118496615|ref|NC_008601.1|	RefSeq	gene	760571	766129	.	+	.	ID=gene712;Name=FTN_0714;Dbxref=GeneID:4548790;gbkey=Gene;locus_tag=FTN_0714	101562	84021	0.34325	13.6006	0.0934803		0.34325	1.26861	0.103329
gi|118496615|ref|NC_008601.1|	RefSeq	gene	766940	770710	.	+	.	ID=gene713;Name=FTN_0715;Dbxref=GeneID:4548791;gbkey=Gene;locus_tag=FTN_0715	39610	27350	0.0824654	12.4033	0.687077		0.0824654	1.05883	0.0248246
gi|118496615|ref|NC_008601.1|	RefSeq	gene	771325	772140	.	+	.	ID=gene714;Name=FTN_0716;Dbxref=GeneID:4548792;gbkey=Gene;locus_tag=FTN_0716	789	435	-0.24217	6.98594	0.281522		-0.24217	0.845473	-0.0729004
gi|118496615|ref|NC_008601.1|	RefSeq	gene	772240	773937	.	-	.	ID=gene715;Name=FTN_0717;Dbxref=GeneID:4548793;gbkey=Gene;locus_tag=FTN_0717	3026	1485	-0.410136	8.10753	0.0507485		-0.410136	0.752553	-0.123463
gi|118496615|ref|NC_008601.1|	RefSeq	gene	773934	774791	.	-	.	ID=gene716;Name=FTN_0718;Dbxref=GeneID:4548794;gbkey=Gene;locus_tag=FTN_0718	5100	3230	-0.0421723	8.81956	0.839842		-0.0421723	0.971192	-0.0126951
gi|118496615|ref|NC_008601.1|	RefSeq	gene	774793	774996	.	-	.	ID=gene717;Name=FTN_0719;Dbxref=GeneID:4548795;gbkey=Gene;locus_tag=FTN_0719	908	241	-1.29652	5.81052	1.90363e-08		-1.29652	0.407107	-0.390291
gi|118496615|ref|NC_008601.1|	RefSeq	gene	775195	775911	.	+	.	ID=gene718;Name=FTN_0720;Dbxref=GeneID:4548796;gbkey=Gene;locus_tag=FTN_0720	3176	2034	-0.0261004	8.18765	0.90255		-0.0261004	0.982071	-0.00785701
gi|118496615|ref|NC_008601.1|	RefSeq	gene	776065	777051	.	-	.	ID=gene719;Name=FTN_0721;Dbxref=GeneID:4548797;gbkey=Gene;locus_tag=FTN_0721	1117	638	-0.191184	6.89095	0.380963		-0.191184	0.875887	-0.057552
gi|118496615|ref|NC_008601.1|	RefSeq	gene	777263	778249	.	+	.	ID=gene720;Name=FTN_0722;Dbxref=GeneID:4548798;gbkey=Gene;locus_tag=FTN_0722	771	566	0.170829	6.97203	0.44291		0.170829	1.12571	0.0514247
gi|118496615|ref|NC_008601.1|	RefSeq	gene	778319	778522	.	-	.	ID=gene721;Name=cspA;Dbxref=GeneID:4548799;gbkey=Gene;gene=cspA;locus_tag=FTN_0723	375	311	0.346689	6.33433	0.141147		0.346689	1.27164	0.104364
gi|118496615|ref|NC_008601.1|	RefSeq	gene	778721	779050	.	-	.	ID=gene722;Name=FTN_0724;Dbxref=GeneID:4547853;gbkey=Gene;locus_tag=FTN_0724	116	44	-0.780409	3.943	0.018725		-0.780409	0.582202	-0.234926
gi|118496615|ref|NC_008601.1|	RefSeq	gene	779296	779496	.	+	.	ID=gene723;Name=rpsU;Dbxref=GeneID:4547854;gbkey=Gene;gene=rpsU;locus_tag=FTN_0725	224	136	-0.10303	4.83097	0.723228		-0.10303	0.931075	-0.0310152
gi|118496615|ref|NC_008601.1|	RefSeq	gene	779775	779862	.	+	.	ID=gene724;Name=FTN_0726;Dbxref=GeneID:4547855;gbkey=Gene;locus_tag=FTN_0726	41	53	0.984527	3.24212	0.00855414		0.984527	1.97866	0.296372
gi|118496615|ref|NC_008601.1|	RefSeq	gene	780006	780575	.	+	.	ID=gene725;Name=FTN_0727;Dbxref=GeneID:4547856;gbkey=Gene;locus_tag=FTN_0727	356	266	0.196261	5.30046	0.413652		0.196261	1.14572	0.0590803
gi|118496615|ref|NC_008601.1|	RefSeq	gene	780666	781805	.	+	.	ID=gene726;Name=FTN_0728;Dbxref=GeneID:4547857;gbkey=Gene;locus_tag=FTN_0728	7692	7753	0.628175	9.43439	0.00234047		0.628175	1.54561	0.1891
gi|118496615|ref|NC_008601.1|	RefSeq	gene	781822	782685	.	+	.	ID=gene727;Name=galU;Dbxref=GeneID:4547858;gbkey=Gene;gene=galU;locus_tag=FTN_0729	3414	3283	0.560321	8.2613	0.00707069		0.560321	1.4746	0.168673
gi|118496615|ref|NC_008601.1|	RefSeq	gene	782807	784744	.	+	.	ID=gene728;Name=acs;Dbxref=GeneID:4547859;gbkey=Gene;gene=acs;locus_tag=FTN_0730	5816	2287	-0.729757	8.81586	0.000461516		-0.729757	0.603006	-0.219679
gi|118496615|ref|NC_008601.1|	RefSeq	gene	784756	785673	.	+	.	ID=gene729;Name=FTN_0731;Dbxref=GeneID:4547860;gbkey=Gene;locus_tag=FTN_0731	2249	1086	-0.433436	7.38961	0.0407358		-0.433436	0.740496	-0.130477
gi|118496615|ref|NC_008601.1|	RefSeq	gene	785676	785882	.	-	.	ID=gene730;Name=FTN_0732;Dbxref=GeneID:4547861;gbkey=Gene;locus_tag=FTN_0732	311	159	-0.350905	4.65086	0.165268		-0.350905	0.784092	-0.105633
gi|118496615|ref|NC_008601.1|	RefSeq	gene	785967	786260	.	-	.	ID=gene731;Name=FTN_0733;Dbxref=GeneID:4547862;gbkey=Gene;locus_tag=FTN_0733	90	57	-0.0421017	3.25317	0.949416		-0.0421017	0.971239	-0.0126739
gi|118496615|ref|NC_008601.1|	RefSeq	gene	786282	787331	.	-	.	ID=gene732;Name=recF;Dbxref=GeneID:4547863;gbkey=Gene;gene=recF;locus_tag=FTN_0734	962	956	0.607685	6.45445	0.00481665		0.607685	1.52381	0.182931
gi|118496615|ref|NC_008601.1|	RefSeq	gene	787335	788081	.	-	.	ID=gene733;Name=FTN_0735;Dbxref=GeneID:4547864;gbkey=Gene;locus_tag=FTN_0735	320	163	-0.356219	4.57479	0.15905		-0.356219	0.781209	-0.107233
gi|118496615|ref|NC_008601.1|	RefSeq	gene	788274	790358	.	+	.	ID=gene734;Name=glyS;Dbxref=GeneID:4547865;gbkey=Gene;gene=glyS;locus_tag=FTN_0736	8596	6905	0.300761	9.8355	0.14412		0.300761	1.23179	0.090538
gi|118496615|ref|NC_008601.1|	RefSeq	gene	790570	791376	.	-	.	ID=gene735;Name=potI;Dbxref=GeneID:4547866;gbkey=Gene;gene=potI;locus_tag=FTN_0737	750	322	-0.602889	6.30458	0.00811373		-0.602889	0.658434	-0.181488
gi|118496615|ref|NC_008601.1|	RefSeq	gene	791390	792307	.	-	.	ID=gene736;Name=potH;Dbxref=GeneID:4547867;gbkey=Gene;gene=potH;locus_tag=FTN_0738	2609	1509	-0.173104	7.5776	0.4109		-0.173104	0.886932	-0.0521095
gi|118496615|ref|NC_008601.1|	RefSeq	gene	792271	793392	.	-	.	ID=gene737;Name=potG;Dbxref=GeneID:4547868;gbkey=Gene;gene=potG;locus_tag=FTN_0739	4102	2039	-0.39166	8.2932	0.060331		-0.39166	0.762252	-0.117901
gi|118496615|ref|NC_008601.1|	RefSeq	gene	793798	794058	.	+	.	ID=gene738;Name=FTN_0740;Dbxref=GeneID:4547869;gbkey=Gene;locus_tag=FTN_0740	3073	1685	-0.250096	7.4462	0.232696		-0.250096	0.84084	-0.0752864
gi|118496615|ref|NC_008601.1|	RefSeq	gene	794171	795628	.	-	.	ID=gene739;Name=FTN_0741;Dbxref=GeneID:4547870;gbkey=Gene;locus_tag=FTN_0741	1125	731	-0.00519143	6.51155	0.986888		-0.00519143	0.996408	-0.00156278
gi|118496615|ref|NC_008601.1|	RefSeq	gene	796240	796890	.	+	.	ID=gene740;Name=serB;Dbxref=GeneID:4548236;gbkey=Gene;gene=serB;locus_tag=FTN_0742	364	267	0.169624	5.37876	0.490308		0.169624	1.12477	0.051062
gi|118496615|ref|NC_008601.1|	RefSeq	gene	796879	797901	.	-	.	ID=gene741;Name=FTN_0743;Dbxref=GeneID:4548237;gbkey=Gene;locus_tag=FTN_0743	400	324	0.312677	5.99944	0.181547		0.312677	1.24201	0.0941252
gi|118496615|ref|NC_008601.1|	RefSeq	gene	797981	798379	.	+	.	ID=gene742;Name=FTN_0744;Dbxref=GeneID:4548238;gbkey=Gene;locus_tag=FTN_0744	462	241	-0.321952	5.15168	0.171677		-0.321952	0.799987	-0.0969172
gi|118496615|ref|NC_008601.1|	RefSeq	gene	798391	799098	.	+	.	ID=gene743;Name=FTN_0745;Dbxref=GeneID:4548239;gbkey=Gene;locus_tag=FTN_0745	1102	468	-0.618648	6.38713	0.00501506		-0.618648	0.651281	-0.186232
gi|118496615|ref|NC_008601.1|	RefSeq	gene	799235	800332	.	+	.	ID=gene744;Name=alr;Dbxref=GeneID:4548240;gbkey=Gene;gene=alr;locus_tag=FTN_0746	1570	821	-0.318487	7.15562	0.137621		-0.318487	0.801911	-0.095874
gi|118496615|ref|NC_008601.1|	RefSeq	gene	800413	802023	.	+	.	ID=gene745;Name=FTN_0747;Dbxref=GeneID:4548241;gbkey=Gene;locus_tag=FTN_0747	5508	2008	-0.838948	8.31512	5.95884e-05		-0.838948	0.559051	-0.252549
gi|118496615|ref|NC_008601.1|	RefSeq	gene	802109	802951	.	+	.	ID=gene746;Name=pheA;Dbxref=GeneID:4548242;gbkey=Gene;gene=pheA;locus_tag=FTN_0748	1639	739	-0.532321	6.88832	0.0132274		-0.532321	0.691442	-0.160244
gi|118496615|ref|NC_008601.1|	RefSeq	gene	802977	803645	.	+	.	ID=gene747;Name=FTN_0749;Dbxref=GeneID:4548243;gbkey=Gene;locus_tag=FTN_0749	720	335	-0.486925	5.72726	0.0311672		-0.486925	0.713545	-0.146579
gi|118496615|ref|NC_008601.1|	RefSeq	gene	803701	805074	.	+	.	ID=gene748;Name=sdaA;Dbxref=GeneID:4548244;gbkey=Gene;gene=sdaA;locus_tag=FTN_0750	15690	11872	0.214505	10.2936	0.295927		0.214505	1.16031	0.0645725
gi|118496615|ref|NC_008601.1|	RefSeq	gene	805177	806400	.	+	.	ID=gene749;Name=sufS;Dbxref=GeneID:4548245;gbkey=Gene;gene=sufS;locus_tag=FTN_0751	7815	6652	0.384325	9.51588	0.0622021		0.384325	1.30525	0.115693
gi|118496615|ref|NC_008601.1|	RefSeq	gene	806421	806777	.	+	.	ID=gene750;Name=FTN_0752;Dbxref=GeneID:4548246;gbkey=Gene;locus_tag=FTN_0752	1291	1103	0.389693	7.38355	0.0680497		0.389693	1.31011	0.117309
gi|118496615|ref|NC_008601.1|	RefSeq	gene	806791	807342	.	+	.	ID=gene751;Name=FTN_0753;Dbxref=GeneID:4548247;gbkey=Gene;locus_tag=FTN_0753	1299	927	0.130015	7.92862	0.546607		0.130015	1.0943	0.0391384
gi|118496615|ref|NC_008601.1|	RefSeq	gene	807354	807842	.	+	.	ID=gene752;Name=coaD;Dbxref=GeneID:4548248;gbkey=Gene;gene=coaD;locus_tag=FTN_0754	911	605	0.0262693	7.61105	0.91467		0.0262693	1.01838	0.00790785
gi|118496615|ref|NC_008601.1|	RefSeq	gene	807847	808092	.	+	.	ID=gene753;Name=FTN_0755;Dbxref=GeneID:4548249;gbkey=Gene;locus_tag=FTN_0755	297	226	0.222544	6.27783	0.365905		0.222544	1.16679	0.0669925
gi|118496615|ref|NC_008601.1|	RefSeq	gene	808202	809380	.	+	.	ID=gene754;Name=fopA;Dbxref=GeneID:4548250;gbkey=Gene;gene=fopA;locus_tag=FTN_0756	22015	9606	-0.579685	12.4281	0.00483751		-0.579685	0.66911	-0.174502
gi|118496615|ref|NC_008601.1|	RefSeq	gene	810052	814941	.	+	.	ID=gene755;Name=FTN_0757;Dbxref=GeneID:4548251;gbkey=Gene;locus_tag=FTN_0757	11654	7502	-0.0186882	10.2765	0.928123		-0.0186882	0.98713	-0.00562572
gi|118496615|ref|NC_008601.1|	RefSeq	gene	814922	815878	.	+	.	ID=gene756;Name=FTN_0758;Dbxref=GeneID:4548252;gbkey=Gene;locus_tag=FTN_0758	881	651	0.180276	6.87204	0.410303		0.180276	1.1331	0.0542685
gi|118496615|ref|NC_008601.1|	RefSeq	gene	816036	816329	.	+	.	ID=gene757;Name=FTN_0759;Dbxref=GeneID:4548253;gbkey=Gene;locus_tag=FTN_0759	199	91	-0.511573	5.09988	0.0657888		-0.511573	0.701457	-0.153999
gi|118496615|ref|NC_008601.1|	RefSeq	gene	816310	816900	.	+	.	ID=gene758;Name=FTN_0760;Dbxref=GeneID:4548254;gbkey=Gene;locus_tag=FTN_0760	826	792	0.556064	7.41185	0.0104641		0.556064	1.47025	0.167392
gi|118496615|ref|NC_008601.1|	RefSeq	gene	818940	820025	.	+	.	ID=gene759;Name=FTN_0761;Dbxref=GeneID:4548255;gbkey=Gene;locus_tag=FTN_0761	2849	1660	-0.162474	8.65041	0.439156		-0.162474	0.893492	-0.0489095
gi|118496615|ref|NC_008601.1|	RefSeq	gene	820018	820266	.	+	.	ID=gene760;Name=grxC;Dbxref=GeneID:4547569;gbkey=Gene;gene=grxC;locus_tag=FTN_0762	903	511	-0.204576	6.72076	0.357748		-0.204576	0.867794	-0.0615836
gi|118496615|ref|NC_008601.1|	RefSeq	gene	820263	820712	.	+	.	ID=gene761;Name=FTN_0763;Dbxref=GeneID:4547570;gbkey=Gene;locus_tag=FTN_0763	1241	889	0.135526	7.45636	0.530525		0.135526	1.09849	0.0407974
gi|118496615|ref|NC_008601.1|	RefSeq	gene	820725	821078	.	-	.	ID=gene762;Name=FTN_0764;Dbxref=GeneID:4547571;gbkey=Gene;locus_tag=FTN_0764	1292	877	0.0578256	7.17364	0.791567		0.0578256	1.0409	0.0174072
gi|118496615|ref|NC_008601.1|	RefSeq	gene	821243	822211	.	-	.	ID=gene763;Name=FTN_0765;Dbxref=GeneID:4547572;gbkey=Gene;locus_tag=FTN_0765	1424	687	-0.434724	7.59902	0.044014		-0.434724	0.739835	-0.130865
gi|118496615|ref|NC_008601.1|	RefSeq	gene	822306	823058	.	-	.	ID=gene764;Name=spoU;Dbxref=GeneID:4547573;gbkey=Gene;gene=spoU;locus_tag=FTN_0766	609	504	0.343695	5.95863	0.125061		0.343695	1.269	0.103463
gi|118496615|ref|NC_008601.1|	RefSeq	gene	823200	825152	.	+	.	ID=gene765;Name=betT;Dbxref=GeneID:4547574;gbkey=Gene;gene=betT;locus_tag=FTN_0767	1039	634	-0.0958369	7.15892	0.663523		-0.0958369	0.935729	-0.0288498
gi|118496615|ref|NC_008601.1|	RefSeq	gene	825145	825621	.	-	.	ID=gene766;Name=tspO;Dbxref=GeneID:4547575;gbkey=Gene;gene=tspO;locus_tag=FTN_0768	842	282	-0.96109	6.24478	2.48818e-05		-0.96109	0.513669	-0.289317
gi|118496615|ref|NC_008601.1|	RefSeq	gene	825750	826604	.	+	.	ID=gene767;Name=FTN_0769;Dbxref=GeneID:4547576;gbkey=Gene;locus_tag=FTN_0769	2067	1357	0.00967119	7.45924	0.966491		0.00967119	1.00673	0.00291132
gi|118496615|ref|NC_008601.1|	RefSeq	gene	826601	827803	.	-	.	ID=gene768;Name=FTN_0770;Dbxref=GeneID:4547577;gbkey=Gene;locus_tag=FTN_0770	957	610	-0.0329149	6.9558	0.889454		-0.0329149	0.977443	-0.00990836
gi|118496615|ref|NC_008601.1|	RefSeq	gene	828083	829204	.	-	.	ID=gene769;Name=FTN_0771;Dbxref=GeneID:4547578;gbkey=Gene;locus_tag=FTN_0771	56701	35161	-0.0726083	11.7741	0.72271		-0.0726083	0.950917	-0.0218573
gi|118496615|ref|NC_008601.1|	RefSeq	gene	829225	829515	.	-	.	ID=gene770;Name=FTN_0772;Dbxref=GeneID:4547579;gbkey=Gene;locus_tag=FTN_0772	10367	5951	-0.184002	9.33232	0.37152		-0.184002	0.880258	-0.0553901
gi|118496615|ref|NC_008601.1|	RefSeq	gene	829603	830691	.	-	.	ID=gene771;Name=FTN_0773;Dbxref=GeneID:4547580;gbkey=Gene;locus_tag=FTN_0773	2895	2925	0.631636	8.27902	0.00246375		0.631636	1.54932	0.190141
gi|118496615|ref|NC_008601.1|	RefSeq	gene	830694	831029	.	-	.	ID=gene772;Name=FTN_0774;Dbxref=GeneID:4547581;gbkey=Gene;locus_tag=FTN_0774	939	647	0.0794177	6.67781	0.720127		0.0794177	1.05659	0.0239071
gi|118496615|ref|NC_008601.1|	RefSeq	gene	831132	831467	.	+	.	ID=gene773;Name=FTN_0775;Dbxref=GeneID:4547582;gbkey=Gene;locus_tag=FTN_0775	301	184	-0.0932197	5.00938	0.725001		-0.0932197	0.937428	-0.0280619
gi|118496615|ref|NC_008601.1|	RefSeq	gene	831494	833560	.	+	.	ID=gene774;Name=FTN_0776;Dbxref=GeneID:4547583;gbkey=Gene;locus_tag=FTN_0776	1342	686	-0.35127	7.32458	0.104435		-0.35127	0.783894	-0.105743
gi|118496615|ref|NC_008601.1|	RefSeq	gene	833557	834003	.	-	.	ID=gene775;Name=FTN_0777;Dbxref=GeneID:4547584;gbkey=Gene;locus_tag=FTN_0777	854	451	-0.304259	6.42642	0.174933		-0.304259	0.809858	-0.0915911
gi|118496615|ref|NC_008601.1|	RefSeq	gene	834159	836756	.	+	.	ID=gene776;Name=alaS;Dbxref=GeneID:4547585;gbkey=Gene;gene=alaS;locus_tag=FTN_0778	24207	11358	-0.474922	10.646	0.0207809		-0.474922	0.719505	-0.142966
gi|118496615|ref|NC_008601.1|	RefSeq	gene	836764	838146	.	+	.	ID=gene777;Name=FTN_0779;Dbxref=GeneID:4547586;gbkey=Gene;locus_tag=FTN_0779	6171	2021	-0.99361	8.66795	2.06752e-06		-0.99361	0.502219	-0.299107
gi|118496615|ref|NC_008601.1|	RefSeq	gene	838149	839528	.	+	.	ID=gene778;Name=pepB;Dbxref=GeneID:4547587;gbkey=Gene;gene=pepB;locus_tag=FTN_0780	5176	1404	-1.26545	8.21593	2.14741e-09		-1.26545	0.415971	-0.380937
gi|118496615|ref|NC_008601.1|	RefSeq	gene	839608	840627	.	+	.	ID=gene779;Name=talA;Dbxref=GeneID:4547320;gbkey=Gene;gene=talA;locus_tag=FTN_0781	7758	3574	-0.501344	8.96412	0.0153987		-0.501344	0.706448	-0.15092
gi|118496615|ref|NC_008601.1|	RefSeq	gene	840650	841225	.	+	.	ID=gene780;Name=FTN_0782;Dbxref=GeneID:4547321;gbkey=Gene;locus_tag=FTN_0782	3505	1852	-0.303526	7.92058	0.14641		-0.303526	0.81027	-0.0913705
gi|118496615|ref|NC_008601.1|	RefSeq	gene	841263	841751	.	-	.	ID=gene781;Name=FTN_0783;Dbxref=GeneID:4547322;gbkey=Gene;locus_tag=FTN_0783	420	240	-0.190492	5.34226	0.428004		-0.190492	0.876307	-0.0573438
gi|118496615|ref|NC_008601.1|	RefSeq	gene	841767	842442	.	-	.	ID=gene782;Name=FTN_0784;Note=frameshift;Dbxref=GeneID:4547323;gbkey=Gene;locus_tag=FTN_0784;pseudo=true	548	161	-1.14984	5.43585	2.30867e-06		-1.14984	0.450675	-0.346136
gi|118496615|ref|NC_008601.1|	RefSeq	gene	842439	842945	.	-	.	ID=gene783;Name=FTN_0785;Dbxref=GeneID:4547324;gbkey=Gene;locus_tag=FTN_0785	457	161	-0.887938	5.06143	0.000287732		-0.887938	0.540386	-0.267296
gi|118496615|ref|NC_008601.1|	RefSeq	gene	843533	844279	.	+	.	ID=gene784;Name=FTN_0786;Dbxref=GeneID:4547325;gbkey=Gene;locus_tag=FTN_0786	715	255	-0.870404	6.11808	0.000156738		-0.870404	0.546994	-0.262018
gi|118496615|ref|NC_008601.1|	RefSeq	gene	844273	846288	.	+	.	ID=gene785;Name=rep;Dbxref=GeneID:4547326;gbkey=Gene;gene=rep;locus_tag=FTN_0787	1766	809	-0.509432	7.19921	0.0173137		-0.509432	0.702499	-0.153354
gi|118496615|ref|NC_008601.1|	RefSeq	gene	846344	847174	.	+	.	ID=gene786;Name=FTN_0788;Dbxref=GeneID:4547327;gbkey=Gene;locus_tag=FTN_0788	1756	750	-0.610475	6.96671	0.00443893		-0.610475	0.654981	-0.183771
gi|118496615|ref|NC_008601.1|	RefSeq	gene	847642	848631	.	-	.	ID=gene787;Name=FTN_0789;Dbxref=GeneID:4547328;gbkey=Gene;locus_tag=FTN_0789	2504	805	-1.02029	7.8467	1.841e-06		-1.02029	0.493016	-0.307139
gi|118496615|ref|NC_008601.1|	RefSeq	gene	848825	849685	.	+	.	ID=gene788;Name=rdgC;Dbxref=GeneID:4547329;gbkey=Gene;gene=rdgC;locus_tag=FTN_0790	2327	1111	-0.449789	7.26463	0.0335656		-0.449789	0.73215	-0.1354
gi|118496615|ref|NC_008601.1|	RefSeq	gene	849690	849947	.	+	.	ID=gene789;Name=FTN_0791;Dbxref=GeneID:4547330;gbkey=Gene;locus_tag=FTN_0791	1101	525	-0.451563	6.17689	0.0400426		-0.451563	0.73125	-0.135934
gi|118496615|ref|NC_008601.1|	RefSeq	gene	849963	850385	.	-	.	ID=gene790;Name=FTN_0792;Dbxref=GeneID:4547331;gbkey=Gene;locus_tag=FTN_0792	597	302	-0.366287	5.68726	0.111536		-0.366287	0.775776	-0.110263
gi|118496615|ref|NC_008601.1|	RefSeq	gene	850477	851046	.	+	.	ID=gene791;Name=FTN_0793;Dbxref=GeneID:4547332;gbkey=Gene;locus_tag=FTN_0793	184	118	-0.0241094	5.46346	0.941077		-0.0241094	0.983428	-0.00725764
gi|118496615|ref|NC_008601.1|	RefSeq	gene	851999	852079	.	-	.	ID=gene792;Name=FTN_0794;Note=IS insertion;Dbxref=GeneID:4547333;gbkey=Gene;locus_tag=FTN_0794;pseudo=true	175	116	0.0235393	5.77198	0.939441		0.0235393	1.01645	0.00708602
gi|118496615|ref|NC_008601.1|	RefSeq	gene	852098	852310	.	-	.	ID=gene793;Name=FTN_0795;Dbxref=GeneID:4547334;gbkey=Gene;locus_tag=FTN_0795	2054	818	-0.711406	7.17855	0.000871522		-0.711406	0.610725	-0.214155
gi|118496615|ref|NC_008601.1|	RefSeq	gene	853311	853387	.	+	.	ID=gene794;Name=FTN_0796;Dbxref=GeneID:4547335;gbkey=Gene;locus_tag=FTN_0796	75	99	1.01586	4.12979	0.000809676		1.01586	2.0221	0.305803
gi|118496615|ref|NC_008601.1|	RefSeq	gene	853524	854072	.	+	.	ID=gene795;Name=FTN_0797;Dbxref=GeneID:4547336;gbkey=Gene;locus_tag=FTN_0797	175	100	-0.190389	3.89828	0.495017		-0.190389	0.876369	-0.0573129
gi|118496615|ref|NC_008601.1|	RefSeq	gene	854146	856302	.	+	.	ID=gene796;Name=rlmL;Dbxref=GeneID:4547337;gbkey=Gene;gene=rlmL;locus_tag=FTN_0798	2553	1033	-0.688511	7.32548	0.00116186		-0.688511	0.620494	-0.207263
gi|118496615|ref|NC_008601.1|	RefSeq	gene	856314	856643	.	-	.	ID=gene797;Name=emrE;Dbxref=GeneID:4548312;gbkey=Gene;gene=emrE;locus_tag=FTN_0799	198	97	-0.412289	3.83072	0.133986		-0.412289	0.75143	-0.124111
gi|118496615|ref|NC_008601.1|	RefSeq	gene	857559	858587	.	-	.	ID=gene798;Name=FTN_0800;Dbxref=GeneID:4548313;gbkey=Gene;locus_tag=FTN_0800	291	220	0.213171	5.74474	0.381464		0.213171	1.15923	0.0641708
gi|118496615|ref|NC_008601.1|	RefSeq	gene	858597	858947	.	-	.	ID=gene799;Name=FTN_0801;Dbxref=GeneID:4548314;gbkey=Gene;locus_tag=FTN_0801	65	56	0.400962	3.60073	0.250664		0.400962	1.32039	0.120702
gi|118496615|ref|NC_008601.1|	RefSeq	gene	859091	859489	.	+	.	ID=gene800;Name=FTN_0802;Dbxref=GeneID:4548315;gbkey=Gene;locus_tag=FTN_0802	3904	2553	0.00402989	7.99912	0.986204		0.00402989	1.0028	0.00121312
gi|118496615|ref|NC_008601.1|	RefSeq	gene	859494	860435	.	+	.	ID=gene801;Name=fmt;Dbxref=GeneID:4548316;gbkey=Gene;gene=fmt;locus_tag=FTN_0803	6489	3672	-0.204635	8.64275	0.322473		-0.204635	0.867758	-0.0616014
gi|118496615|ref|NC_008601.1|	RefSeq	gene	860439	861413	.	+	.	ID=gene802;Name=gshB;Dbxref=GeneID:4548317;gbkey=Gene;gene=gshB;locus_tag=FTN_0804	5050	2470	-0.414968	8.2055	0.0458634		-0.414968	0.750036	-0.124918
gi|118496615|ref|NC_008601.1|	RefSeq	gene	861403	862704	.	+	.	ID=gene803;Name=hemL;Dbxref=GeneID:4548318;gbkey=Gene;gene=hemL;locus_tag=FTN_0805	9528	8039	0.371627	9.45438	0.0709671		0.371627	1.29381	0.111871
gi|118496615|ref|NC_008601.1|	RefSeq	gene	862720	864387	.	-	.	ID=gene804;Name=FTN_0806;Dbxref=GeneID:4548319;gbkey=Gene;locus_tag=FTN_0806	5695	2750	-0.433461	8.4631	0.036724		-0.433461	0.740483	-0.130485
gi|118496615|ref|NC_008601.1|	RefSeq	gene	864448	865230	.	-	.	ID=gene805;Name=FTN_0807;Dbxref=GeneID:4548320;gbkey=Gene;locus_tag=FTN_0807	10132	4987	-0.405878	9.17323	0.0490413		-0.405878	0.754777	-0.122182
gi|118496615|ref|NC_008601.1|	RefSeq	gene	865252	865992	.	-	.	ID=gene806;Name=FTN_0808;Dbxref=GeneID:4548321;gbkey=Gene;locus_tag=FTN_0808	13325	6124	-0.504793	9.50775	0.0142881		-0.504793	0.704762	-0.151958
gi|118496615|ref|NC_008601.1|	RefSeq	gene	866270	867520	.	+	.	ID=gene807;Name=FTN_0809;Dbxref=GeneID:4548322;gbkey=Gene;locus_tag=FTN_0809	834	363	-0.583158	5.83144	0.00932879		-0.583158	0.667501	-0.175548
gi|118496615|ref|NC_008601.1|	RefSeq	gene	867532	868416	.	+	.	ID=gene808;Name=FTN_0810;Dbxref=GeneID:4548323;gbkey=Gene;locus_tag=FTN_0810	873	613	0.106677	6.04034	0.631398		0.106677	1.07675	0.032113
gi|118496615|ref|NC_008601.1|	RefSeq	gene	868439	869401	.	+	.	ID=gene809;Name=birA;Dbxref=GeneID:4548324;gbkey=Gene;gene=birA;locus_tag=FTN_0811	1151	740	-0.0204984	6.41756	0.930142		-0.0204984	0.985892	-0.00617063
gi|118496615|ref|NC_008601.1|	RefSeq	gene	869344	870021	.	-	.	ID=gene810;Name=bioD;Dbxref=GeneID:4548325;gbkey=Gene;gene=bioD;locus_tag=FTN_0812	360	382	0.702132	5.2736	0.00246129		0.702132	1.62691	0.211363
gi|118496615|ref|NC_008601.1|	RefSeq	gene	870026	870763	.	-	.	ID=gene811;Name=bioC;Dbxref=GeneID:4548326;gbkey=Gene;gene=bioC;locus_tag=FTN_0813	232	150	-0.0123646	4.43057	1		-0.0123646	0.991466	-0.00372213
gi|118496615|ref|NC_008601.1|	RefSeq	gene	870741	871868	.	-	.	ID=gene812;Name=bioF;Dbxref=GeneID:4548327;gbkey=Gene;gene=bioF;locus_tag=FTN_0814	528	525	0.608427	5.79248	0.00677198		0.608427	1.5246	0.183155
gi|118496615|ref|NC_008601.1|	RefSeq	gene	871862	872803	.	-	.	ID=gene813;Name=bioB;Dbxref=GeneID:4548328;gbkey=Gene;gene=bioB;locus_tag=FTN_0815	616	354	-0.182344	5.53522	0.427014		-0.182344	0.88127	-0.0548909
gi|118496615|ref|NC_008601.1|	RefSeq	gene	872849	874180	.	+	.	ID=gene814;Name=bioA;Dbxref=GeneID:4548329;gbkey=Gene;gene=bioA;locus_tag=FTN_0816	515	433	0.366489	6.27623	0.106664		0.366489	1.28921	0.110324
gi|118496615|ref|NC_008601.1|	RefSeq	gene	874182	874682	.	-	.	ID=gene815;Name=FTN_0817;Dbxref=GeneID:4547797;gbkey=Gene;locus_tag=FTN_0817	1320	785	-0.132968	6.89051	0.539687		-0.132968	0.911953	-0.0400273
gi|118496615|ref|NC_008601.1|	RefSeq	gene	874698	875618	.	-	.	ID=gene816;Name=FTN_0818;Dbxref=GeneID:4547798;gbkey=Gene;locus_tag=FTN_0818	3754	2159	-0.181268	8.34	0.384924		-0.181268	0.881927	-0.0545671
gi|118496615|ref|NC_008601.1|	RefSeq	gene	875631	876896	.	-	.	ID=gene817;Name=FTN_0819;Dbxref=GeneID:4547799;gbkey=Gene;locus_tag=FTN_0819	7869	4901	-0.0663133	9.51189	0.748377		-0.0663133	0.955076	-0.0199623
gi|118496615|ref|NC_008601.1|	RefSeq	gene	876898	877251	.	-	.	ID=gene818;Name=folB;Dbxref=GeneID:4547800;gbkey=Gene;gene=folB;locus_tag=FTN_0820	2459	1882	0.230971	7.46664	0.270722		0.230971	1.17362	0.0695293
gi|118496615|ref|NC_008601.1|	RefSeq	gene	877333	878703	.	+	.	ID=gene819;Name=FTN_0821;Dbxref=GeneID:4547801;gbkey=Gene;locus_tag=FTN_0821	2010	998	-0.39326	6.93899	0.0642648		-0.39326	0.761407	-0.118383
gi|118496615|ref|NC_008601.1|	RefSeq	gene	878696	880459	.	+	.	ID=gene820;Name=FTN_0822;Dbxref=GeneID:4547802;gbkey=Gene;locus_tag=FTN_0822	7537	6128	0.31821	9.09065	0.122631		0.31821	1.24678	0.0957907
gi|118496615|ref|NC_008601.1|	RefSeq	gene	880461	881015	.	+	.	ID=gene821;Name=pabA;Dbxref=GeneID:4547803;gbkey=Gene;gene=pabA;locus_tag=FTN_0823	630	336	-0.290024	5.73526	0.202688		-0.290024	0.817889	-0.0873059
gi|118496615|ref|NC_008601.1|	RefSeq	gene	881016	882230	.	-	.	ID=gene822;Name=FTN_0824;Dbxref=GeneID:4547804;gbkey=Gene;locus_tag=FTN_0824	564	346	-0.0881092	6.64154	0.70779		-0.0881092	0.940755	-0.0265235
gi|118496615|ref|NC_008601.1|	RefSeq	gene	882247	883320	.	-	.	ID=gene823;Name=FTN_0825;Dbxref=GeneID:4547805;gbkey=Gene;locus_tag=FTN_0825	2399	1856	0.246539	8.28156	0.239906		0.246539	1.18636	0.0742156
gi|118496615|ref|NC_008601.1|	RefSeq	gene	883399	884463	.	-	.	ID=gene824;Name=FTN_0826;Dbxref=GeneID:4547806;gbkey=Gene;locus_tag=FTN_0826	3397	3668	0.727497	8.64177	0.000475776		0.727497	1.65576	0.218998
gi|118496615|ref|NC_008601.1|	RefSeq	gene	884555	885481	.	-	.	ID=gene825;Name=FTN_0827;Dbxref=GeneID:4547807;gbkey=Gene;locus_tag=FTN_0827	1860	755	-0.683893	7.33711	0.00142454		-0.683893	0.622483	-0.205872
gi|118496615|ref|NC_008601.1|	RefSeq	gene	885559	885984	.	-	.	ID=gene826;Name=FTN_0828;Dbxref=GeneID:4547808;gbkey=Gene;locus_tag=FTN_0828	421	131	-1.0669	5.81207	2.13724e-05		-1.0669	0.477345	-0.321168
gi|118496615|ref|NC_008601.1|	RefSeq	gene	886123	886842	.	-	.	ID=gene827;Name=FTN_0829;Dbxref=GeneID:4547809;gbkey=Gene;locus_tag=FTN_0829	335	143	-0.611013	5.0091	0.0156736		-0.611013	0.654737	-0.183933
gi|118496615|ref|NC_008601.1|	RefSeq	gene	886832	887452	.	-	.	ID=gene828;Name=folE;Dbxref=GeneID:4547810;gbkey=Gene;gene=folE;locus_tag=FTN_0830	611	368	-0.114648	5.66606	0.616974		-0.114648	0.923608	-0.0345123
gi|118496615|ref|NC_008601.1|	RefSeq	gene	887579	888904	.	+	.	ID=gene829;Name=FTN_0831;Dbxref=GeneID:4547811;gbkey=Gene;locus_tag=FTN_0831	3068	1365	-0.551575	7.49205	0.00872588		-0.551575	0.682275	-0.166041
gi|118496615|ref|NC_008601.1|	RefSeq	gene	888901	890442	.	-	.	ID=gene830;Name=FTN_0832;Dbxref=GeneID:4547812;gbkey=Gene;locus_tag=FTN_0832	2669	1235	-0.494965	7.59353	0.0189345		-0.494965	0.709579	-0.148999
gi|118496615|ref|NC_008601.1|	RefSeq	gene	890580	890900	.	-	.	ID=gene831;Name=FTN_0833;Dbxref=GeneID:4547813;gbkey=Gene;locus_tag=FTN_0833	510	329	-0.0156154	5.35309	0.950687		-0.0156154	0.989235	-0.00470072
gi|118496615|ref|NC_008601.1|	RefSeq	gene	890911	892272	.	-	.	ID=gene832;Name=gor;Dbxref=GeneID:4547814;gbkey=Gene;gene=gor;locus_tag=FTN_0834	6069	4263	0.107197	8.75867	0.604319		0.107197	1.07713	0.0322696
gi|118496615|ref|NC_008601.1|	RefSeq	gene	892308	893027	.	-	.	ID=gene833;Name=FTN_0835;Dbxref=GeneID:4547815;gbkey=Gene;locus_tag=FTN_0835	1601	629	-0.730962	6.46379	0.000721068		-0.730962	0.602502	-0.220041
gi|118496615|ref|NC_008601.1|	RefSeq	gene	893027	893530	.	-	.	ID=gene834;Name=FTN_0836;Dbxref=GeneID:4547816;gbkey=Gene;locus_tag=FTN_0836	574	285	-0.39318	5.31685	0.0878195		-0.39318	0.761449	-0.118359
gi|118496615|ref|NC_008601.1|	RefSeq	gene	893530	894228	.	-	.	ID=gene835;Name=FTN_0837;Dbxref=GeneID:4548629;gbkey=Gene;locus_tag=FTN_0837	559	363	-0.00608752	5.53898	1		-0.00608752	0.995789	-0.00183253
gi|118496615|ref|NC_008601.1|	RefSeq	gene	894229	895017	.	-	.	ID=gene836;Name=xthA;Dbxref=GeneID:4548630;gbkey=Gene;gene=xthA;locus_tag=FTN_0838	724	447	-0.0789084	6.0964	0.731475		-0.0789084	0.946774	-0.0237538
gi|118496615|ref|NC_008601.1|	RefSeq	gene	895194	896294	.	+	.	ID=gene837;Name=FTN_0839;Dbxref=GeneID:4548631;gbkey=Gene;locus_tag=FTN_0839	9169	4765	-0.327493	9.03857	0.112308		-0.327493	0.79692	-0.0985851
gi|118496615|ref|NC_008601.1|	RefSeq	gene	896313	896903	.	+	.	ID=gene838;Name=mdaB;Dbxref=GeneID:4548632;gbkey=Gene;gene=mdaB;locus_tag=FTN_0840	4193	2833	0.0511355	8.09477	0.806659		0.0511355	1.03608	0.0153933
gi|118496615|ref|NC_008601.1|	RefSeq	gene	897004	897681	.	+	.	ID=gene839;Name=FTN_0841;Dbxref=GeneID:4548633;gbkey=Gene;locus_tag=FTN_0841	1827	970	-0.296603	7.2703	0.163927		-0.296603	0.814167	-0.0892864
gi|118496615|ref|NC_008601.1|	RefSeq	gene	897751	898863	.	-	.	ID=gene840;Name=aroG;Dbxref=GeneID:4548634;gbkey=Gene;gene=aroG;locus_tag=FTN_0842	10286	7158	0.0937346	9.69683	0.648877		0.0937346	1.06713	0.0282169
gi|118496615|ref|NC_008601.1|	RefSeq	gene	898895	900271	.	-	.	ID=gene841;Name=ffh;Dbxref=GeneID:4548635;gbkey=Gene;gene=ffh;locus_tag=FTN_0843	7629	5430	0.126245	9.62416	0.540517		0.126245	1.09145	0.0380037
gi|118496615|ref|NC_008601.1|	RefSeq	gene	900352	900618	.	-	.	ID=gene842;Name=FTN_0844;Dbxref=GeneID:4548636;gbkey=Gene;locus_tag=FTN_0844	622	166	-1.28844	5.26494	8.89494e-08		-1.28844	0.409395	-0.387858
gi|118496615|ref|NC_008601.1|	RefSeq	gene	900618	901457	.	-	.	ID=gene843;Name=FTN_0845;Dbxref=GeneID:4548637;gbkey=Gene;locus_tag=FTN_0845	1854	1385	0.196019	7.40486	0.354347		0.196019	1.14553	0.0590077
gi|118496615|ref|NC_008601.1|	RefSeq	gene	901617	901835	.	+	.	ID=gene844;Name=infA;Dbxref=GeneID:4548638;gbkey=Gene;gene=infA;locus_tag=FTN_0846	2170	283	-2.32163	6.84683	4.25665e-24		-2.32163	0.200041	-0.69888
gi|118496615|ref|NC_008601.1|	RefSeq	gene	901864	902790	.	-	.	ID=gene845;Name=FTN_0847;Dbxref=GeneID:4548639;gbkey=Gene;locus_tag=FTN_0847	1553	295	-1.77914	7.39045	4.6759e-15		-1.77914	0.291357	-0.535574
gi|118496615|ref|NC_008601.1|	RefSeq	gene	902795	904216	.	-	.	ID=gene846;Name=FTN_0848;Dbxref=GeneID:4548640;gbkey=Gene;locus_tag=FTN_0848	1645	805	-0.414193	7.28155	0.0533055		-0.414193	0.750439	-0.124685
gi|118496615|ref|NC_008601.1|	RefSeq	gene	904275	905648	.	-	.	ID=gene847;Name=trkA;Dbxref=GeneID:4548641;gbkey=Gene;gene=trkA;gene_synonym=sapG;locus_tag=FTN_0849	2065	1507	0.162316	7.54451	0.442047		0.162316	1.11908	0.048862
gi|118496615|ref|NC_008601.1|	RefSeq	gene	905800	906210	.	+	.	ID=gene848;Name=FTN_0850;Dbxref=GeneID:4548642;gbkey=Gene;locus_tag=FTN_0850	3097	1808	-0.159679	8.18804	0.446102		-0.159679	0.895224	-0.0480681
gi|118496615|ref|NC_008601.1|	RefSeq	gene	906217	907662	.	+	.	ID=gene849;Name=sufB;Dbxref=GeneID:4548643;gbkey=Gene;gene=sufB;locus_tag=FTN_0851	7774	6099	0.2667	9.86271	0.195583		0.2667	1.20305	0.0802848
gi|118496615|ref|NC_008601.1|	RefSeq	gene	907701	908450	.	+	.	ID=gene850;Name=sufC;Dbxref=GeneID:4548644;gbkey=Gene;gene=sufC;locus_tag=FTN_0852	3605	3185	0.438068	8.62356	0.0350418		0.438068	1.35479	0.131872
gi|118496615|ref|NC_008601.1|	RefSeq	gene	908463	909608	.	+	.	ID=gene851;Name=sufD;Dbxref=GeneID:4548645;gbkey=Gene;gene=sufD;locus_tag=FTN_0853	3554	2204	-0.0725267	8.36138	0.729267		-0.0725267	0.950971	-0.0218327
gi|118496615|ref|NC_008601.1|	RefSeq	gene	909700	910482	.	+	.	ID=gene852;Name=FTN_0854;Dbxref=GeneID:4548646;gbkey=Gene;locus_tag=FTN_0854	3519	911	-1.33276	7.87268	4.43523e-10		-1.33276	0.397008	-0.4012
gi|118496615|ref|NC_008601.1|	RefSeq	gene	910576	911265	.	+	.	ID=gene853;Name=FTN_0855;Dbxref=GeneID:4548647;gbkey=Gene;locus_tag=FTN_0855	4632	895	-1.75477	7.92552	3.54178e-16		-1.75477	0.29632	-0.52824
gi|118496615|ref|NC_008601.1|	RefSeq	gene	911269	911595	.	+	.	ID=gene854;Name=FTN_0856;Dbxref=GeneID:4547224;gbkey=Gene;locus_tag=FTN_0856	2736	564	-1.66134	7.33628	3.40503e-14		-1.66134	0.316146	-0.500113
gi|118496615|ref|NC_008601.1|	RefSeq	gene	911588	912037	.	+	.	ID=gene855;Name=FTN_0857;Dbxref=GeneID:4547225;gbkey=Gene;locus_tag=FTN_0857	1278	316	-1.39882	6.88641	5.95328e-10		-1.39882	0.379239	-0.421087
gi|118496615|ref|NC_008601.1|	RefSeq	gene	911996	912289	.	-	.	ID=gene856;Name=FTN_0858;Dbxref=GeneID:4547226;gbkey=Gene;locus_tag=FTN_0858	368	141	-0.766805	6.4901	0.00229292		-0.766805	0.587718	-0.230831
gi|118496615|ref|NC_008601.1|	RefSeq	gene	912293	912898	.	-	.	ID=gene857;Name=FTN_0859;Dbxref=GeneID:4547227;gbkey=Gene;locus_tag=FTN_0859	216	130	-0.115646	7.04329	0.6652		-0.115646	0.922969	-0.0348128
gi|118496615|ref|NC_008601.1|	RefSeq	gene	912964	914316	.	-	.	ID=gene858;Name=FTN_0860;Dbxref=GeneID:4547228;gbkey=Gene;locus_tag=FTN_0860	761	487	-0.0271797	6.11589	0.90589		-0.0271797	0.981337	-0.00818189
gi|118496615|ref|NC_008601.1|	RefSeq	gene	914550	915791	.	+	.	ID=gene859;Name=FTN_0861;Dbxref=GeneID:4547229;gbkey=Gene;locus_tag=FTN_0861	3657	1570	-0.603076	7.74887	0.00401703		-0.603076	0.658349	-0.181544
gi|118496615|ref|NC_008601.1|	RefSeq	gene	916124	917248	.	+	.	ID=gene860;Name=FTN_0862;Dbxref=GeneID:4547230;gbkey=Gene;locus_tag=FTN_0862	23539	6941	-1.14504	10.0398	3.55255e-08		-1.14504	0.452178	-0.34469
gi|118496615|ref|NC_008601.1|	RefSeq	gene	917341	917778	.	+	.	ID=gene861;Name=FTN_0863;Dbxref=GeneID:4547231;gbkey=Gene;locus_tag=FTN_0863	226	113	-0.382917	4.46053	0.158808		-0.382917	0.766886	-0.115269
gi|118496615|ref|NC_008601.1|	RefSeq	gene	918329	918700	.	+	.	ID=gene862;Name=FTN_0864;Dbxref=GeneID:4547232;gbkey=Gene;locus_tag=FTN_0864	8670	2248	-1.33056	8.5426	2.44596e-10		-1.33056	0.397613	-0.400539
gi|118496615|ref|NC_008601.1|	RefSeq	gene	918872	919291	.	-	.	ID=gene863;Name=mutT;Dbxref=GeneID:4547233;gbkey=Gene;gene=mutT;locus_tag=FTN_0865	255	124	-0.423076	4.26412	0.109066		-0.423076	0.745833	-0.127359
gi|118496615|ref|NC_008601.1|	RefSeq	gene	919330	919914	.	+	.	ID=gene864;Name=FTN_0866;Dbxref=GeneID:4547234;gbkey=Gene;locus_tag=FTN_0866	1026	267	-1.32501	6.48766	7.3409e-09		-1.32501	0.399147	-0.398868
gi|118496615|ref|NC_008601.1|	RefSeq	gene	919916	920326	.	+	.	ID=gene865;Name=FTN_0867;Dbxref=GeneID:4547235;gbkey=Gene;locus_tag=FTN_0867	766	295	-0.759642	6.33882	0.000873074		-0.759642	0.590643	-0.228675
gi|118496615|ref|NC_008601.1|	RefSeq	gene	920419	920997	.	+	.	ID=gene866;Name=FTN_0868;Dbxref=GeneID:4547236;gbkey=Gene;locus_tag=FTN_0868	339	169	-0.387274	5.05792	0.115647		-0.387274	0.764573	-0.116581
gi|118496615|ref|NC_008601.1|	RefSeq	gene	921132	923027	.	+	.	ID=gene867;Name=FTN_0869;Dbxref=GeneID:4547237;gbkey=Gene;locus_tag=FTN_0869	5403	2119	-0.733561	8.22146	0.000437602		-0.733561	0.601418	-0.220824
gi|118496615|ref|NC_008601.1|	RefSeq	gene	923135	925576	.	+	.	ID=gene868;Name=leuS;Dbxref=GeneID:4547238;gbkey=Gene;gene=leuS;locus_tag=FTN_0870	12774	6087	-0.452611	9.73235	0.0279947		-0.452611	0.730719	-0.13625
gi|118496615|ref|NC_008601.1|	RefSeq	gene	925584	926159	.	+	.	ID=gene869;Name=FTN_0871;Dbxref=GeneID:4547239;gbkey=Gene;locus_tag=FTN_0871	2828	945	-0.964533	7.27734	5.7816e-06		-0.964533	0.512444	-0.290353
gi|118496615|ref|NC_008601.1|	RefSeq	gene	926220	927410	.	+	.	ID=gene870;Name=FTN_0872;Dbxref=GeneID:4547240;gbkey=Gene;locus_tag=FTN_0872	2314	579	-1.38181	7.20334	2.19837e-10		-1.38181	0.383736	-0.415967
gi|118496615|ref|NC_008601.1|	RefSeq	gene	927417	927983	.	-	.	ID=gene871;Name=dcd;Dbxref=GeneID:4547241;gbkey=Gene;gene=dcd;locus_tag=FTN_0873	2780	836	-1.11663	7.38894	1.74934e-07		-1.11663	0.46117	-0.336139
gi|118496615|ref|NC_008601.1|	RefSeq	gene	927995	928855	.	-	.	ID=gene872;Name=FTN_0874;Dbxref=GeneID:4547242;gbkey=Gene;locus_tag=FTN_0874	8181	3063	-0.800522	8.85008	0.000116688		-0.800522	0.574141	-0.240981
gi|118496615|ref|NC_008601.1|	RefSeq	gene	928929	930161	.	+	.	ID=gene873;Name=FTN_0875;Dbxref=GeneID:4547243;gbkey=Gene;locus_tag=FTN_0875	800	300	-0.798046	6.14895	0.000457928		-0.798046	0.575127	-0.240236
gi|118496615|ref|NC_008601.1|	RefSeq	gene	930215	931642	.	+	.	ID=gene874;Name=FTN_0876;Dbxref=GeneID:4548820;gbkey=Gene;locus_tag=FTN_0876	1236	309	-1.38293	6.09845	9.65264e-10		-1.38293	0.38344	-0.416302
gi|118496615|ref|NC_008601.1|	RefSeq	gene	931734	933164	.	+	.	ID=gene875;Name=cls;Dbxref=GeneID:4548821;gbkey=Gene;gene=cls;locus_tag=FTN_0877	1047	357	-0.935286	6.12321	2.9539e-05		-0.935286	0.522939	-0.281549
gi|118496615|ref|NC_008601.1|	RefSeq	gene	933333	934322	.	+	.	ID=gene876;Name=FTN_0878;Dbxref=GeneID:4548822;gbkey=Gene;locus_tag=FTN_0878	9403	714	-3.10216	8.42935	9.46905e-43		-3.10216	0.116455	-0.933843
gi|118496615|ref|NC_008601.1|	RefSeq	gene	934344	935090	.	-	.	ID=gene877;Name=FTN_0879;Dbxref=GeneID:4548823;gbkey=Gene;locus_tag=FTN_0879	928	182	-1.73285	6.34663	2.59473e-13		-1.73285	0.300857	-0.52164
gi|118496615|ref|NC_008601.1|	RefSeq	gene	935093	936310	.	-	.	ID=gene878;Name=FTN_0880;Dbxref=GeneID:4548824;gbkey=Gene;locus_tag=FTN_0880	1817	793	-0.579317	7.372	0.00681455		-0.579317	0.669281	-0.174392
gi|118496615|ref|NC_008601.1|	RefSeq	gene	936452	936883	.	+	.	ID=gene879;Name=FTN_0881;Dbxref=GeneID:4548825;gbkey=Gene;locus_tag=FTN_0881	670	230	-0.925445	5.50864	7.70845e-05		-0.925445	0.526518	-0.278587
gi|118496615|ref|NC_008601.1|	RefSeq	gene	936926	939298	.	-	.	ID=gene880;Name=pheT;Dbxref=GeneID:4548826;gbkey=Gene;gene=pheT;locus_tag=FTN_0882	21846	8934	-0.673195	10.2818	0.00108302		-0.673195	0.627116	-0.202652
gi|118496615|ref|NC_008601.1|	RefSeq	gene	939318	940331	.	-	.	ID=gene881;Name=pheS;Dbxref=GeneID:4548827;gbkey=Gene;gene=pheS;locus_tag=FTN_0883	8641	3395	-0.73098	9.06567	0.000424218		-0.73098	0.602494	-0.220047
gi|118496615|ref|NC_008601.1|	RefSeq	gene	940417	941310	.	-	.	ID=gene882;Name=FTN_0884;Dbxref=GeneID:4548828;gbkey=Gene;locus_tag=FTN_0884	1016	308	-1.10486	5.91207	1.04188e-06		-1.10486	0.464947	-0.332596
gi|118496615|ref|NC_008601.1|	RefSeq	gene	941335	942810	.	-	.	ID=gene883;Name=FTN_0885;Dbxref=GeneID:4548829;gbkey=Gene;locus_tag=FTN_0885	1219	448	-0.827199	6.56713	0.000178925		-0.827199	0.563622	-0.249012
gi|118496615|ref|NC_008601.1|	RefSeq	gene	942996	944264	.	+	.	ID=gene884;Name=FTN_0886;Dbxref=GeneID:4548830;gbkey=Gene;locus_tag=FTN_0886	789	287	-0.841966	6.11016	0.000230853		-0.841966	0.557883	-0.253457
gi|118496615|ref|NC_008601.1|	RefSeq	gene	944249	945208	.	-	.	ID=gene885;Name=FTN_0887;Dbxref=GeneID:4548831;gbkey=Gene;locus_tag=FTN_0887	545	189	-0.910728	5.28514	0.000145368		-0.910728	0.531917	-0.274156
gi|118496615|ref|NC_008601.1|	RefSeq	gene	945336	945872	.	+	.	ID=gene886;Name=FTN_0888;Dbxref=GeneID:4548832;gbkey=Gene;locus_tag=FTN_0888	399	133	-0.96765	4.75649	0.000115111		-0.96765	0.511338	-0.291292
gi|118496615|ref|NC_008601.1|	RefSeq	gene	945887	946090	.	+	.	ID=gene887;Name=FTN_0889;Dbxref=GeneID:4548833;gbkey=Gene;locus_tag=FTN_0889	354	141	-0.710872	4.51864	0.00507736		-0.710872	0.610951	-0.213994
gi|118496615|ref|NC_008601.1|	RefSeq	gene	946569	947336	.	+	.	ID=gene888;Name=FTN_0890;Dbxref=GeneID:4548834;gbkey=Gene;locus_tag=FTN_0890	2201	490	-1.55032	6.92635	1.88315e-12		-1.55032	0.341433	-0.466694
gi|118496615|ref|NC_008601.1|	RefSeq	gene	947378	948424	.	-	.	ID=gene889;Name=ruvB;Dbxref=GeneID:4548835;gbkey=Gene;gene=ruvB;locus_tag=FTN_0891	3633	1324	-0.839421	8.21445	6.75551e-05		-0.839421	0.558868	-0.252691
gi|118496615|ref|NC_008601.1|	RefSeq	gene	948488	949213	.	-	.	ID=gene890;Name=FTN_0892;Dbxref=GeneID:4548836;gbkey=Gene;locus_tag=FTN_0892	4757	1033	-1.58633	7.80872	1.18931e-13		-1.58633	0.333017	-0.477533
gi|118496615|ref|NC_008601.1|	RefSeq	gene	949331	949921	.	+	.	ID=gene891;Name=FTN_0893;Dbxref=GeneID:4548837;gbkey=Gene;locus_tag=FTN_0893	2873	493	-1.9259	7.41938	3.14663e-18		-1.9259	0.263177	-0.579753
gi|118496615|ref|NC_008601.1|	RefSeq	gene	949931	950560	.	-	.	ID=gene892;Name=FTN_0894;Dbxref=GeneID:4548838;gbkey=Gene;locus_tag=FTN_0894	1959	926	-0.464201	7.26234	0.0292889		-0.464201	0.724872	-0.139739
gi|118496615|ref|NC_008601.1|	RefSeq	gene	950582	950917	.	-	.	ID=gene893;Name=FTN_0895;Dbxref=GeneID:4547741;gbkey=Gene;locus_tag=FTN_0895	2568	959	-0.804189	7.15666	0.000154054		-0.804189	0.572684	-0.242085
gi|118496615|ref|NC_008601.1|	RefSeq	gene	950933	952780	.	-	.	ID=gene894;Name=dxs;Dbxref=GeneID:4547742;gbkey=Gene;gene=dxs;locus_tag=FTN_0896	17209	7256	-0.62912	10.0229	0.00226723		-0.62912	0.64657	-0.189384
gi|118496615|ref|NC_008601.1|	RefSeq	gene	952862	954412	.	-	.	ID=gene895;Name=guaA;Dbxref=GeneID:4547743;gbkey=Gene;gene=guaA;locus_tag=FTN_0897	10614	3935	-0.814728	9.56713	8.50119e-05		-0.814728	0.568516	-0.245257
gi|118496615|ref|NC_008601.1|	RefSeq	gene	954500	956044	.	-	.	ID=gene896;Name=FTN_0898;Dbxref=GeneID:4547744;gbkey=Gene;locus_tag=FTN_0898	2512	647	-1.34008	7.16602	6.39594e-10		-1.34008	0.395	-0.403403
gi|118496615|ref|NC_008601.1|	RefSeq	gene	956100	956876	.	-	.	ID=gene897;Name=truA;Dbxref=GeneID:4547745;gbkey=Gene;gene=truA;gene_synonym=hisT;locus_tag=FTN_0899	926	233	-1.37352	5.89918	3.27356e-09		-1.37352	0.385949	-0.41347
gi|118496615|ref|NC_008601.1|	RefSeq	gene	956879	958711	.	-	.	ID=gene898;Name=FTN_0900;Dbxref=GeneID:4547746;gbkey=Gene;locus_tag=FTN_0900	5653	1177	-1.64703	8.18758	1.23254e-14		-1.64703	0.319297	-0.495806
gi|118496615|ref|NC_008601.1|	RefSeq	gene	958724	959317	.	-	.	ID=gene899;Name=FTN_0901;Dbxref=GeneID:4547747;gbkey=Gene;locus_tag=FTN_0901	2895	450	-2.06854	6.97936	1.59685e-20		-2.06854	0.238401	-0.622691
gi|118496615|ref|NC_008601.1|	RefSeq	gene	959366	960097	.	-	.	ID=gene900;Name=yhbG;Dbxref=GeneID:4547748;gbkey=Gene;gene=yhbG;locus_tag=FTN_0902	3025	831	-1.24713	7.36582	5.6355e-09		-1.24713	0.421287	-0.375422
gi|118496615|ref|NC_008601.1|	RefSeq	gene	960171	961004	.	-	.	ID=gene901;Name=FTN_0903;Dbxref=GeneID:4547749;gbkey=Gene;locus_tag=FTN_0903	7677	1971	-1.34478	8.49256	1.70137e-10		-1.34478	0.393714	-0.40482
gi|118496615|ref|NC_008601.1|	RefSeq	gene	960991	961617	.	-	.	ID=gene902;Name=FTN_0904;Dbxref=GeneID:4547750;gbkey=Gene;locus_tag=FTN_0904	4467	836	-1.80082	7.67882	7.04293e-17		-1.80082	0.287011	-0.542101
gi|118496615|ref|NC_008601.1|	RefSeq	gene	961625	962173	.	-	.	ID=gene903;Name=yrbI;Dbxref=GeneID:4547751;gbkey=Gene;gene=yrbI;locus_tag=FTN_0905	6296	1276	-1.68594	8.22053	2.80118e-15		-1.68594	0.3108	-0.507519
gi|118496615|ref|NC_008601.1|	RefSeq	gene	962264	962785	.	-	.	ID=gene904;Name=ppa;Dbxref=GeneID:4547752;gbkey=Gene;gene=ppa;locus_tag=FTN_0906	8238	1077	-2.31838	8.496	1.62994e-26		-2.31838	0.200492	-0.697902
gi|118496615|ref|NC_008601.1|	RefSeq	gene	962942	964276	.	+	.	ID=gene905;Name=FTN_0907;Dbxref=GeneID:4547753;gbkey=Gene;locus_tag=FTN_0907	12689	2407	-1.78144	9.73841	4.77672e-17		-1.78144	0.290893	-0.536267
gi|118496615|ref|NC_008601.1|	RefSeq	gene	964309	964593	.	+	.	ID=gene906;Name=FTN_0908;Dbxref=GeneID:4547754;gbkey=Gene;locus_tag=FTN_0908	2791	526	-1.79067	7.1816	4.18851e-16		-1.79067	0.289039	-0.539044
gi|118496615|ref|NC_008601.1|	RefSeq	gene	964603	965223	.	+	.	ID=gene907;Name=lipB;Dbxref=GeneID:4547755;gbkey=Gene;gene=lipB;locus_tag=FTN_0909	2264	622	-1.24697	7.3462	8.82235e-09		-1.24697	0.421333	-0.375374
gi|118496615|ref|NC_008601.1|	RefSeq	gene	965706	967178	.	+	.	ID=gene908;Name=FTN_0910;Dbxref=GeneID:4547756;gbkey=Gene;locus_tag=FTN_0910	9898	2124	-1.60352	8.81192	3.4777e-14		-1.60352	0.329073	-0.482707
gi|118496615|ref|NC_008601.1|	RefSeq	gene	967156	969195	.	+	.	ID=gene909;Name=FTN_0911;Dbxref=GeneID:4547757;gbkey=Gene;locus_tag=FTN_0911	21526	5824	-1.26919	10.1778	1.13561e-09		-1.26919	0.414891	-0.382066
gi|118496615|ref|NC_008601.1|	RefSeq	gene	969308	970570	.	-	.	ID=gene910;Name=ndh;Dbxref=GeneID:4547758;gbkey=Gene;gene=ndh;locus_tag=FTN_0912	31475	15432	-0.411489	10.9876	0.0448708		-0.411489	0.751847	-0.123871
gi|118496615|ref|NC_008601.1|	RefSeq	gene	970677	972410	.	-	.	ID=gene911;Name=rpoD;Dbxref=GeneID:4547759;gbkey=Gene;gene=rpoD;locus_tag=FTN_0913	15442	5954	-0.758129	10.8527	0.000242878		-0.758129	0.591263	-0.22822
gi|118496615|ref|NC_008601.1|	RefSeq	gene	972435	974252	.	-	.	ID=gene912;Name=dnaG;Dbxref=GeneID:4547760;gbkey=Gene;gene=dnaG;locus_tag=FTN_0914	26038	10287	-0.723001	11.1375	0.000449057		-0.723001	0.605836	-0.217645
gi|118496615|ref|NC_008601.1|	RefSeq	gene	974273	974719	.	-	.	ID=gene913;Name=FTN_0915;Dbxref=GeneID:4548256;gbkey=Gene;locus_tag=FTN_0915	3667	1381	-0.792054	9.80848	0.00016681		-0.792054	0.577521	-0.238432
gi|118496615|ref|NC_008601.1|	RefSeq	gene	974780	974977	.	-	.	ID=gene914;Name=rpsU;Dbxref=GeneID:4548257;gbkey=Gene;gene=rpsU;locus_tag=FTN_0916	1312	569	-0.588394	8.74866	0.00698693		-0.588394	0.665083	-0.177124
gi|118496615|ref|NC_008601.1|	RefSeq	gene	975232	976635	.	+	.	ID=gene915;Name=FTN_0917;Dbxref=GeneID:4548258;gbkey=Gene;locus_tag=FTN_0917	17465	4555	-1.32214	9.64117	2.48656e-10		-1.32214	0.399943	-0.398002
gi|118496615|ref|NC_008601.1|	RefSeq	gene	976636	977247	.	+	.	ID=gene916;Name=FTN_0918;Dbxref=GeneID:4548259;gbkey=Gene;locus_tag=FTN_0918	1930	369	-1.76985	6.789	2.66782e-15		-1.76985	0.29324	-0.532777
gi|118496615|ref|NC_008601.1|	RefSeq	gene	977263	977679	.	+	.	ID=gene917;Name=FTN_0919;Dbxref=GeneID:4548260;gbkey=Gene;locus_tag=FTN_0919	1097	281	-1.34782	5.92559	3.20956e-09		-1.34782	0.392884	-0.405736
gi|118496615|ref|NC_008601.1|	RefSeq	gene	977672	978475	.	+	.	ID=gene918;Name=FTN_0920;Dbxref=GeneID:4548261;gbkey=Gene;locus_tag=FTN_0920	2462	470	-1.77209	6.98959	1.09657e-15		-1.77209	0.292783	-0.533454
gi|118496615|ref|NC_008601.1|	RefSeq	gene	978489	979340	.	+	.	ID=gene919;Name=FTN_0921;Dbxref=GeneID:4548262;gbkey=Gene;locus_tag=FTN_0921	3636	798	-1.57098	7.74672	2.8342e-13		-1.57098	0.336579	-0.472913
gi|118496615|ref|NC_008601.1|	RefSeq	gene	979358	980335	.	-	.	ID=gene920;Name=ispB;Dbxref=GeneID:4548263;gbkey=Gene;gene=ispB;locus_tag=FTN_0922	12497	5978	-0.447051	9.61469	0.0299922		-0.447051	0.733541	-0.134576
gi|118496615|ref|NC_008601.1|	RefSeq	gene	980424	980855	.	-	.	ID=gene921;Name=FTN_0923;Dbxref=GeneID:4548264;gbkey=Gene;locus_tag=FTN_0923	1121	374	-0.966701	6.45694	1.44794e-05		-0.966701	0.511675	-0.291006
gi|118496615|ref|NC_008601.1|	RefSeq	gene	980936	981559	.	-	.	ID=gene922;Name=FTN_0924;Dbxref=GeneID:4548265;gbkey=Gene;locus_tag=FTN_0924	202	62	-1.08601	5.3951	0.000200296		-1.08601	0.471062	-0.326922
gi|118496615|ref|NC_008601.1|	RefSeq	gene	982220	983200	.	-	.	ID=gene923;Name=FTN_0925;Dbxref=GeneID:4548266;gbkey=Gene;locus_tag=FTN_0925	4391	1406	-1.02611	8.60658	1.11888e-06		-1.02611	0.491032	-0.30889
gi|118496615|ref|NC_008601.1|	RefSeq	gene	983652	984254	.	-	.	ID=gene924;Name=cysC;Dbxref=GeneID:4548267;gbkey=Gene;gene=cysC;locus_tag=FTN_0926	1965	669	-0.93756	6.96722	1.39984e-05		-0.93756	0.522115	-0.282234
gi|118496615|ref|NC_008601.1|	RefSeq	gene	984274	985686	.	-	.	ID=gene925;Name=cysN;Dbxref=GeneID:4548268;gbkey=Gene;gene=cysN;locus_tag=FTN_0927	2685	1701	-0.041747	8.10219	0.844396		-0.041747	0.971478	-0.0125671
gi|118496615|ref|NC_008601.1|	RefSeq	gene	988922	989818	.	-	.	ID=gene926;Name=cysD;Dbxref=GeneID:4548269;gbkey=Gene;gene=cysD;locus_tag=FTN_0928	863	729	0.37329	6.52836	0.0877988		0.37329	1.2953	0.112372
gi|118496615|ref|NC_008601.1|	RefSeq	gene	989842	990945	.	-	.	ID=gene927;Name=FTN_0929;Dbxref=GeneID:4548270;gbkey=Gene;locus_tag=FTN_0929	811	355	-0.574962	6.02528	0.0107536		-0.574962	0.671304	-0.173081
gi|118496615|ref|NC_008601.1|	RefSeq	gene	990926	991774	.	-	.	ID=gene928;Name=FTN_0930;Dbxref=GeneID:4548271;gbkey=Gene;locus_tag=FTN_0930	1347	688	-0.352435	6.84244	0.102491		-0.352435	0.783261	-0.106093
gi|118496615|ref|NC_008601.1|	RefSeq	gene	991793	992752	.	+	.	ID=gene929;Name=FTN_0931;Dbxref=GeneID:4548272;gbkey=Gene;locus_tag=FTN_0931	1892	600	-1.03997	6.82028	1.67045e-06		-1.03997	0.486339	-0.313061
gi|118496615|ref|NC_008601.1|	RefSeq	gene	992752	994551	.	+	.	ID=gene930;Name=FTN_0932;Dbxref=GeneID:4548273;gbkey=Gene;locus_tag=FTN_0932	2127	1381	-0.0063167	7.40736	0.979347		-0.0063167	0.995631	-0.00190152
gi|118496615|ref|NC_008601.1|	RefSeq	gene	994548	994832	.	+	.	ID=gene931;Name=FTN_0933;Dbxref=GeneID:4547530;gbkey=Gene;locus_tag=FTN_0933	540	157	-1.1649	4.99836	1.75703e-06		-1.1649	0.445994	-0.350671
gi|118496615|ref|NC_008601.1|	RefSeq	gene	994829	995323	.	+	.	ID=gene932;Name=FTN_0934;Dbxref=GeneID:4547531;gbkey=Gene;locus_tag=FTN_0934	846	314	-0.812908	5.93767	0.000331134		-0.812908	0.569233	-0.24471
gi|118496615|ref|NC_008601.1|	RefSeq	gene	995336	997189	.	+	.	ID=gene933;Name=asnB;Dbxref=GeneID:4547532;gbkey=Gene;gene=asnB;locus_tag=FTN_0935	1529	853	-0.225157	7.1228	0.294293		-0.225157	0.855502	-0.067779
gi|118496615|ref|NC_008601.1|	RefSeq	gene	997186	998418	.	+	.	ID=gene934;Name=FTN_0936;Dbxref=GeneID:4547533;gbkey=Gene;locus_tag=FTN_0936	914	375	-0.668373	6.26162	0.00287091		-0.668373	0.629216	-0.2012
gi|118496615|ref|NC_008601.1|	RefSeq	gene	998435	999337	.	+	.	ID=gene935;Name=FTN_0937;Dbxref=GeneID:4547534;gbkey=Gene;locus_tag=FTN_0937	484	267	-0.241296	6.73538	0.306437		-0.241296	0.845985	-0.0726372
gi|118496615|ref|NC_008601.1|	RefSeq	gene	999435	999626	.	-	.	ID=gene936;Name=FTN_0938;Dbxref=GeneID:4547535;gbkey=Gene;locus_tag=FTN_0938	209	69	-0.981028	6.46015	0.000525238		-0.981028	0.506619	-0.295319
gi|118496615|ref|NC_008601.1|	RefSeq	gene	1000019	1000177	.	-	.	ID=gene937;Name=FTN_0939;Dbxref=GeneID:4547536;gbkey=Gene;locus_tag=FTN_0939	359	190	-0.301054	6.96222	0.216973		-0.301054	0.811659	-0.0906262
gi|118496615|ref|NC_008601.1|	RefSeq	gene	1000693	1000887	.	-	.	ID=gene938;Name=FTN_0940;Dbxref=GeneID:4547537;gbkey=Gene;locus_tag=FTN_0940	1300	1465	0.789108	7.45108	0.00020751		0.789108	1.72801	0.237545
gi|118496615|ref|NC_008601.1|	RefSeq	gene	1001160	1001330	.	-	.	ID=gene939;Name=FTN_0941;Dbxref=GeneID:4547538;gbkey=Gene;locus_tag=FTN_0941	159	64	-0.695243	4.82299	0.0203529		-0.695243	0.617605	-0.209289
gi|118496615|ref|NC_008601.1|	RefSeq	gene	1001367	1001510	.	-	.	ID=gene940;Name=FTN_0942;Dbxref=GeneID:4547539;gbkey=Gene;locus_tag=FTN_0942	194	56	-1.17435	4.44124	8.33218e-05		-1.17435	0.443082	-0.353516
gi|118496615|ref|NC_008601.1|	RefSeq	gene	1001819	1002259	.	-	.	ID=gene941;Name=rimI;Dbxref=GeneID:4547540;gbkey=Gene;gene=rimI;locus_tag=FTN_0943	172	82	-0.451457	5.15864	0.119989		-0.451457	0.731304	-0.135902
gi|118496615|ref|NC_008601.1|	RefSeq	gene	1002237	1002662	.	-	.	ID=gene942;Name=FTN_0944;Dbxref=GeneID:4547541;gbkey=Gene;locus_tag=FTN_0944	348	146	-0.635982	5.64756	0.0120863		-0.635982	0.643503	-0.19145
gi|118496615|ref|NC_008601.1|	RefSeq	gene	1002662	1003477	.	-	.	ID=gene943;Name=rsuA;Dbxref=GeneID:4547542;gbkey=Gene;gene=rsuA;locus_tag=FTN_0945	3494	2401	0.0755422	8.37498	0.718007		0.0755422	1.05376	0.0227405
gi|118496615|ref|NC_008601.1|	RefSeq	gene	1003470	1004375	.	-	.	ID=gene944;Name=pilF;Dbxref=GeneID:4547543;gbkey=Gene;gene=pilF;locus_tag=FTN_0946	6116	3281	-0.281656	8.91689	0.173707		-0.281656	0.822646	-0.0847868
gi|118496615|ref|NC_008601.1|	RefSeq	gene	1004365	1005477	.	-	.	ID=gene945;Name=FTN_0947;Dbxref=GeneID:4547544;gbkey=Gene;locus_tag=FTN_0947	4408	2673	-0.104871	9.05109	0.614487		-0.104871	0.929888	-0.0315693
gi|118496615|ref|NC_008601.1|	RefSeq	gene	1005508	1006905	.	-	.	ID=gene946;Name=dnaB;Dbxref=GeneID:4547545;gbkey=Gene;gene=dnaB;locus_tag=FTN_0948	3381	2367	0.102395	9.81699	0.624097		0.102395	1.07355	0.0308239
gi|118496615|ref|NC_008601.1|	RefSeq	gene	1006993	1007448	.	-	.	ID=gene947;Name=rplI;Dbxref=GeneID:4547546;gbkey=Gene;gene=rplI;locus_tag=FTN_0949	7248	4016	-0.235029	10.7432	0.255263		-0.235029	0.849668	-0.0707507
gi|118496615|ref|NC_008601.1|	RefSeq	gene	1007467	1007685	.	-	.	ID=gene948;Name=rpsR;Dbxref=GeneID:4547547;gbkey=Gene;gene=rpsR;locus_tag=FTN_0950	4476	2271	-0.362079	10.2128	0.0819042		-0.362079	0.778043	-0.108997
gi|118496615|ref|NC_008601.1|	RefSeq	gene	1007701	1008036	.	-	.	ID=gene949;Name=rpsF;Dbxref=GeneID:4547548;gbkey=Gene;gene=rpsF;locus_tag=FTN_0951	3880	2067	-0.291716	9.89865	0.16186		-0.291716	0.81693	-0.0878153
gi|118496615|ref|NC_008601.1|	RefSeq	gene	1008162	1008644	.	-	.	ID=gene950;Name=FTN_0952;Dbxref=GeneID:4547549;gbkey=Gene;locus_tag=FTN_0952	2271	573	-1.36978	6.80591	3.28622e-10		-1.36978	0.386951	-0.412345
gi|118496615|ref|NC_008601.1|	RefSeq	gene	1008733	1009659	.	+	.	ID=gene951;Name=hemF;Dbxref=GeneID:4547244;gbkey=Gene;gene=hemF;locus_tag=FTN_0953	2083	902	-0.590621	7.1642	0.00555758		-0.590621	0.664057	-0.177795
gi|118496615|ref|NC_008601.1|	RefSeq	gene	1009684	1010892	.	+	.	ID=gene952;Name=FTN_0954;Dbxref=GeneID:4547245;gbkey=Gene;locus_tag=FTN_0954	890	566	-0.0362075	6.50454	0.874206		-0.0362075	0.975215	-0.0108995
gi|118496615|ref|NC_008601.1|	RefSeq	gene	1010967	1012019	.	+	.	ID=gene953;Name=serC;Dbxref=GeneID:4547246;gbkey=Gene;gene=serC;locus_tag=FTN_0955	4072	2563	-0.0511126	8.44889	0.807164		-0.0511126	0.965192	-0.0153864
gi|118496615|ref|NC_008601.1|	RefSeq	gene	1012006	1012671	.	+	.	ID=gene954;Name=cmk;Dbxref=GeneID:4547247;gbkey=Gene;gene=cmk;locus_tag=FTN_0956	2868	2335	0.320152	9.01652	0.125112		0.320152	1.24846	0.0963753
gi|118496615|ref|NC_008601.1|	RefSeq	gene	1012688	1013299	.	-	.	ID=gene955;Name=FTN_0957;Dbxref=GeneID:4547248;gbkey=Gene;locus_tag=FTN_0957	10489	6839	-0.000230284	10.5122	0.999791		-0.000230284	0.99984	-6.93225e-05
gi|118496615|ref|NC_008601.1|	RefSeq	gene	1013302	1013826	.	-	.	ID=gene956;Name=FTN_0958;Dbxref=GeneID:4547249;gbkey=Gene;locus_tag=FTN_0958	19921	14004	0.108338	10.8962	0.597321		0.108338	1.07799	0.0326129
gi|118496615|ref|NC_008601.1|	RefSeq	gene	1013924	1014793	.	+	.	ID=gene957;Name=oxyR;Dbxref=GeneID:4547250;gbkey=Gene;gene=oxyR;locus_tag=FTN_0959	470	287	-0.0947889	5.94443	0.695451		-0.0947889	0.936409	-0.0285343
gi|118496615|ref|NC_008601.1|	RefSeq	gene	1014796	1015527	.	-	.	ID=gene958;Name=FTN_0960;Dbxref=GeneID:4547251;gbkey=Gene;locus_tag=FTN_0960	371	165	-0.551889	6.38743	0.0256217		-0.551889	0.682126	-0.166135
gi|118496615|ref|NC_008601.1|	RefSeq	gene	1015541	1015813	.	-	.	ID=gene959;Name=FTN_0961;Dbxref=GeneID:4547252;gbkey=Gene;locus_tag=FTN_0961	2002	1207	-0.113218	7.06344	0.594658		-0.113218	0.924524	-0.034082
gi|118496615|ref|NC_008601.1|	RefSeq	gene	1015897	1016691	.	-	.	ID=gene960;Name=FTN_0962;Dbxref=GeneID:4547253;gbkey=Gene;locus_tag=FTN_0962	12618	7852	-0.0675608	9.59649	0.742699		-0.0675608	0.95425	-0.0203378
gi|118496615|ref|NC_008601.1|	RefSeq	gene	1016696	1018192	.	-	.	ID=gene961;Name=FTN_0963;Dbxref=GeneID:4547254;gbkey=Gene;locus_tag=FTN_0963	123426	94174	0.226544	12.9966	0.267939		0.226544	1.17003	0.0681964
gi|118496615|ref|NC_008601.1|	RefSeq	gene	1018206	1019321	.	-	.	ID=gene962;Name=FTN_0964;Dbxref=GeneID:4547255;gbkey=Gene;locus_tag=FTN_0964	93236	42747	-0.508273	12.2499	0.0131549		-0.508273	0.703063	-0.153006
gi|118496615|ref|NC_008601.1|	RefSeq	gene	1019741	1021150	.	+	.	ID=gene963;Name=FTN_0965;Dbxref=GeneID:4547256;gbkey=Gene;locus_tag=FTN_0965	1369	883	-0.0158458	7.54786	0.945931		-0.0158458	0.989077	-0.00477006
gi|118496615|ref|NC_008601.1|	RefSeq	gene	1021587	1022996	.	-	.	ID=gene964;Name=FTN_0966;Dbxref=GeneID:4547257;gbkey=Gene;locus_tag=FTN_0966	2355	1772	0.206429	7.82898	0.325722		0.206429	1.15383	0.0621412
gi|118496615|ref|NC_008601.1|	RefSeq	gene	1022983	1023456	.	-	.	ID=gene965;Name=vanY;Dbxref=GeneID:4547258;gbkey=Gene;gene=vanY;locus_tag=FTN_0967	1038	610	-0.150113	6.62156	0.493407		-0.150113	0.90118	-0.0451884
gi|118496615|ref|NC_008601.1|	RefSeq	gene	1023450	1024142	.	-	.	ID=gene966;Name=dnaQ;Dbxref=GeneID:4547259;gbkey=Gene;gene=dnaQ;locus_tag=FTN_0968	1322	559	-0.624923	6.78411	0.00411698		-0.624923	0.648454	-0.188121
gi|118496615|ref|NC_008601.1|	RefSeq	gene	1024196	1025695	.	-	.	ID=gene967;Name=FTN_0969;Dbxref=GeneID:4547260;gbkey=Gene;locus_tag=FTN_0969	1914	1036	-0.268754	7.80811	0.206301		-0.268754	0.830036	-0.080903
gi|118496615|ref|NC_008601.1|	RefSeq	gene	1025699	1025914	.	-	.	ID=gene968;Name=FTN_0970;Dbxref=GeneID:4547261;gbkey=Gene;locus_tag=FTN_0970	720	371	-0.339708	6.33653	0.135496		-0.339708	0.790201	-0.102262
gi|118496615|ref|NC_008601.1|	RefSeq	gene	1025920	1026252	.	-	.	ID=gene969;Name=phnA;Dbxref=GeneID:4547262;gbkey=Gene;gene=phnA;locus_tag=FTN_0971	1570	1010	-0.0196178	6.93808	0.930865		-0.0196178	0.986494	-0.00590555
gi|118496615|ref|NC_008601.1|	RefSeq	gene	1026358	1027734	.	-	.	ID=gene970;Name=FTN_0972;Dbxref=GeneID:4547397;gbkey=Gene;locus_tag=FTN_0972	3812	2043	-0.283057	8.21669	0.174805		-0.283057	0.821848	-0.0852086
gi|118496615|ref|NC_008601.1|	RefSeq	gene	1027799	1028398	.	-	.	ID=gene971;Name=FTN_0973;Dbxref=GeneID:4547398;gbkey=Gene;locus_tag=FTN_0973	18769	12351	0.0130655	10.3025	0.949529		0.0130655	1.0091	0.00393311
gi|118496615|ref|NC_008601.1|	RefSeq	gene	1028537	1029118	.	+	.	ID=gene972;Name=FTN_0974;Dbxref=GeneID:4547399;gbkey=Gene;locus_tag=FTN_0974	2284	899	-0.728317	7.05492	0.000625927		-0.728317	0.603608	-0.219245
gi|118496615|ref|NC_008601.1|	RefSeq	gene	1029173	1030663	.	+	.	ID=gene973;Name=FTN_0975;Dbxref=GeneID:4547400;gbkey=Gene;locus_tag=FTN_0975	3665	1443	-0.727913	7.89978	0.00053154		-0.727913	0.603777	-0.219124
gi|118496615|ref|NC_008601.1|	RefSeq	gene	1030667	1031410	.	+	.	ID=gene974;Name=FTN_0976;Dbxref=GeneID:4547401;gbkey=Gene;locus_tag=FTN_0976	1500	803	-0.284669	6.78419	0.185305		-0.284669	0.82093	-0.085694
gi|118496615|ref|NC_008601.1|	RefSeq	gene	1031487	1032056	.	+	.	ID=gene975;Name=FTN_0977;Dbxref=GeneID:4547402;gbkey=Gene;locus_tag=FTN_0977	406	186	-0.50916	5.56158	0.0369005		-0.50916	0.702631	-0.153272
gi|118496615|ref|NC_008601.1|	RefSeq	gene	1032065	1032700	.	-	.	ID=gene976;Name=FTN_0978;Dbxref=GeneID:4547403;gbkey=Gene;locus_tag=FTN_0978	844	426	-0.369524	6.66024	0.0973852		-0.369524	0.774038	-0.111238
gi|118496615|ref|NC_008601.1|	RefSeq	gene	1032716	1033228	.	-	.	ID=gene977;Name=FTN_0979;Dbxref=GeneID:4547404;gbkey=Gene;locus_tag=FTN_0979	496	177	-0.869437	5.22036	0.000318561		-0.869437	0.54736	-0.261727
gi|118496615|ref|NC_008601.1|	RefSeq	gene	1033379	1034338	.	+	.	ID=gene978;Name=mdh;Dbxref=GeneID:4547405;gbkey=Gene;gene=mdh;locus_tag=FTN_0980	4377	2853	-0.000673055	8.97071	0.999037		-0.000673055	0.999534	-0.00020261
gi|118496615|ref|NC_008601.1|	RefSeq	gene	1034542	1036314	.	+	.	ID=gene979;Name=nrdA;Dbxref=GeneID:4547406;gbkey=Gene;gene=nrdA;locus_tag=FTN_0981	13472	7336	-0.260106	9.93112	0.205837		-0.260106	0.835027	-0.0782996
gi|118496615|ref|NC_008601.1|	RefSeq	gene	1036318	1036578	.	+	.	ID=gene980;Name=grxA;Dbxref=GeneID:4547407;gbkey=Gene;gene=grxA;locus_tag=FTN_0982	6999	2910	-0.649322	8.56386	0.00176046		-0.649322	0.63758	-0.195466
gi|118496615|ref|NC_008601.1|	RefSeq	gene	1036585	1037817	.	+	.	ID=gene981;Name=FTN_0983;Dbxref=GeneID:4547408;gbkey=Gene;locus_tag=FTN_0983	8449	4543	-0.27834	9.24359	0.177318		-0.27834	0.824539	-0.0837888
gi|118496615|ref|NC_008601.1|	RefSeq	gene	1037814	1039706	.	-	.	ID=gene982;Name=FTN_0984;Dbxref=GeneID:4547409;gbkey=Gene;locus_tag=FTN_0984	2033	1463	0.142099	7.64793	0.501562		0.142099	1.10351	0.0427761
gi|118496615|ref|NC_008601.1|	RefSeq	gene	1039817	1040419	.	+	.	ID=gene983;Name=FTN_0985;Dbxref=GeneID:4547410;gbkey=Gene;locus_tag=FTN_0985	386	239	-0.0747706	5.30083	0.762421		-0.0747706	0.949493	-0.0225082
gi|118496615|ref|NC_008601.1|	RefSeq	gene	1040426	1041475	.	+	.	ID=gene984;Name=dinP;Dbxref=GeneID:4547411;gbkey=Gene;gene=dinP;locus_tag=FTN_0986	458	355	0.249185	6.25455	0.279478		0.249185	1.18854	0.0750123
gi|118496615|ref|NC_008601.1|	RefSeq	gene	1042429	1043415	.	-	.	ID=gene985;Name=FTN_0987;Dbxref=GeneID:4547412;gbkey=Gene;locus_tag=FTN_0987	3732	7209	1.5666	8.9885	1.05959e-13		1.5666	2.96206	0.471594
gi|118496615|ref|NC_008601.1|	RefSeq	gene	1043405	1044250	.	-	.	ID=gene986;Name=prmA;Dbxref=GeneID:4547413;gbkey=Gene;gene=prmA;locus_tag=FTN_0988	1062	1706	1.3005	7.26694	1.44189e-09		1.3005	2.46314	0.39149
gi|118496615|ref|NC_008601.1|	RefSeq	gene	1044412	1045569	.	-	.	ID=gene987;Name=yqhD;Dbxref=GeneID:4547414;gbkey=Gene;gene=yqhD;locus_tag=FTN_0989	1388	696	-0.379012	6.99527	0.07899		-0.379012	0.768964	-0.114094
gi|118496615|ref|NC_008601.1|	RefSeq	gene	1045584	1048394	.	-	.	ID=gene988;Name=FTN_0990;Dbxref=GeneID:4547415;gbkey=Gene;locus_tag=FTN_0990	7777	4577	-0.148019	9.22379	0.47336		-0.148019	0.902489	-0.0445581
gi|118496615|ref|NC_008601.1|	RefSeq	gene	1048713	1049855	.	-	.	ID=gene989;Name=lldD;Dbxref=GeneID:4547416;gbkey=Gene;gene=lldD;locus_tag=FTN_0991	2087	1108	-0.296659	7.64266	0.161748		-0.296659	0.814135	-0.0893033
gi|118496615|ref|NC_008601.1|	RefSeq	gene	1050287	1051477	.	-	.	ID=gene990;Name=tyrS;Dbxref=GeneID:4548206;gbkey=Gene;gene=tyrS;locus_tag=FTN_0992	5585	3024	-0.268302	8.75015	0.19551		-0.268302	0.830296	-0.0807668
gi|118496615|ref|NC_008601.1|	RefSeq	gene	1051591	1052493	.	+	.	ID=gene991;Name=lplA;Dbxref=GeneID:4548207;gbkey=Gene;gene=lplA;locus_tag=FTN_0993	478	241	-0.371054	5.38623	0.118549		-0.371054	0.773217	-0.111698
gi|118496615|ref|NC_008601.1|	RefSeq	gene	1052496	1053245	.	-	.	ID=gene992;Name=FTN_0994;Dbxref=GeneID:4548208;gbkey=Gene;locus_tag=FTN_0994	209	113	-0.270175	5.33361	0.336948		-0.270175	0.829219	-0.0813309
gi|118496615|ref|NC_008601.1|	RefSeq	gene	1053437	1053988	.	+	.	ID=gene993;Name=hslV;Dbxref=GeneID:4548209;gbkey=Gene;gene=hslV;locus_tag=FTN_0995	4457	3583	0.301875	8.75604	0.145233		0.301875	1.23275	0.0908735
gi|118496615|ref|NC_008601.1|	RefSeq	gene	1053996	1055363	.	+	.	ID=gene994;Name=hslU;Dbxref=GeneID:4548210;gbkey=Gene;gene=hslU;locus_tag=FTN_0996	11691	12266	0.686049	10.1957	0.000871854		0.686049	1.60887	0.206521
gi|118496615|ref|NC_008601.1|	RefSeq	gene	1056320	1057771	.	+	.	ID=gene995;Name=FTN_0997;Dbxref=GeneID:4548211;gbkey=Gene;locus_tag=FTN_0997	4105	1946	-0.460061	8.08206	0.0274818		-0.460061	0.726956	-0.138492
gi|118496615|ref|NC_008601.1|	RefSeq	gene	1057851	1059011	.	+	.	ID=gene996;Name=FTN_0998;Dbxref=GeneID:4548212;gbkey=Gene;locus_tag=FTN_0998	1968	828	-0.632177	6.94041	0.00308846		-0.632177	0.645202	-0.190304
gi|118496615|ref|NC_008601.1|	RefSeq	gene	1059107	1060507	.	+	.	ID=gene997;Name=udhA;Dbxref=GeneID:4548213;gbkey=Gene;gene=udhA;locus_tag=FTN_0999	5390	1851	-0.925154	8.53534	9.99446e-06		-0.925154	0.526624	-0.278499
gi|118496615|ref|NC_008601.1|	RefSeq	gene	1060511	1061359	.	+	.	ID=gene998;Name=pilD;Dbxref=GeneID:4548214;gbkey=Gene;gene=pilD;locus_tag=FTN_1000	1083	605	-0.223203	6.79713	0.308508		-0.223203	0.856661	-0.0671908
gi|118496615|ref|NC_008601.1|	RefSeq	gene	1061369	1062214	.	+	.	ID=gene999;Name=FTN_1001;Dbxref=GeneID:4548215;gbkey=Gene;locus_tag=FTN_1001	1659	938	-0.205844	6.97952	0.335912		-0.205844	0.867031	-0.0619653
gi|118496615|ref|NC_008601.1|	RefSeq	gene	1062223	1063107	.	+	.	ID=gene1000;Name=blaA;Dbxref=GeneID:4548216;gbkey=Gene;gene=blaA;locus_tag=FTN_1002	1059	558	-0.307527	6.47572	0.160598		-0.307527	0.808026	-0.0925749
gi|118496615|ref|NC_008601.1|	RefSeq	gene	1063100	1063675	.	+	.	ID=gene1001;Name=pth;Dbxref=GeneID:4548217;gbkey=Gene;gene=pth;locus_tag=FTN_1003	830	513	-0.0773485	6.27196	0.739589		-0.0773485	0.947798	-0.0232842
gi|118496615|ref|NC_008601.1|	RefSeq	gene	1063694	1064785	.	+	.	ID=gene1002;Name=ychF;Dbxref=GeneID:4548218;gbkey=Gene;gene=ychF;locus_tag=FTN_1004	3330	2452	0.175219	8.42609	0.400717		0.175219	1.12914	0.0527461
gi|118496615|ref|NC_008601.1|	RefSeq	gene	1064800	1065078	.	+	.	ID=gene1003;Name=FTN_1005;Dbxref=GeneID:4548219;gbkey=Gene;locus_tag=FTN_1005	463	312	0.0473082	6.30586	0.855662		0.0473082	1.03334	0.0142412
gi|118496615|ref|NC_008601.1|	RefSeq	gene	1065115	1066374	.	-	.	ID=gene1004;Name=FTN_1006;Dbxref=GeneID:4548220;gbkey=Gene;locus_tag=FTN_1006	1558	761	-0.41689	8.52216	0.0523658		-0.41689	0.749037	-0.125497
gi|118496615|ref|NC_008601.1|	RefSeq	gene	1066470	1066760	.	-	.	ID=gene1005;Name=rplY;Dbxref=GeneID:4548221;gbkey=Gene;gene=rplY;locus_tag=FTN_1007	3176	1174	-0.818936	8.71071	0.000106021		-0.818936	0.56686	-0.246524
gi|118496615|ref|NC_008601.1|	RefSeq	gene	1066860	1067828	.	-	.	ID=gene1006;Name=prsA;Dbxref=GeneID:4548222;gbkey=Gene;gene=prsA;locus_tag=FTN_1008	45951	23350	-0.359883	11.4214	0.0790183		-0.359883	0.779228	-0.108336
gi|118496615|ref|NC_008601.1|	RefSeq	gene	1068039	1069046	.	+	.	ID=gene1007;Name=FTN_1009;Dbxref=GeneID:4548223;gbkey=Gene;locus_tag=FTN_1009	1258	692	-0.245466	6.56969	0.257117		-0.245466	0.843543	-0.0738927
gi|118496615|ref|NC_008601.1|	RefSeq	gene	1069039	1070322	.	+	.	ID=gene1008;Name=FTN_1010;Dbxref=GeneID:4548292;gbkey=Gene;locus_tag=FTN_1010	409	297	0.155097	5.78565	0.519965		0.155097	1.1135	0.0466889
gi|118496615|ref|NC_008601.1|	RefSeq	gene	1070329	1071615	.	-	.	ID=gene1009;Name=FTN_1011;Dbxref=GeneID:4548293;gbkey=Gene;locus_tag=FTN_1011	530	280	-0.303679	5.7084	0.193717		-0.303679	0.810183	-0.0914166
gi|118496615|ref|NC_008601.1|	RefSeq	gene	1071927	1072760	.	+	.	ID=gene1010;Name=FTN_1012;Dbxref=GeneID:4548294;gbkey=Gene;locus_tag=FTN_1012	350	295	0.370008	5.49589	0.120582		0.370008	1.29236	0.111384
gi|118496615|ref|NC_008601.1|	RefSeq	gene	1072738	1073913	.	-	.	ID=gene1011;Name=FTN_1013;Dbxref=GeneID:4548295;gbkey=Gene;locus_tag=FTN_1013	1293	876	0.0550637	6.93455	0.801537		0.0550637	1.0389	0.0165758
gi|118496615|ref|NC_008601.1|	RefSeq	gene	1074011	1074643	.	-	.	ID=gene1012;Name=FTN_1014;Dbxref=GeneID:4548296;gbkey=Gene;locus_tag=FTN_1014	598	227	-0.780402	5.70842	0.000838957		-0.780402	0.582205	-0.234924
gi|118496615|ref|NC_008601.1|	RefSeq	gene	1074643	1075146	.	-	.	ID=gene1013;Name=FTN_1015;Dbxref=GeneID:4548297;gbkey=Gene;locus_tag=FTN_1015	645	312	-0.430846	6.01358	0.0604518		-0.430846	0.741827	-0.129698
gi|118496615|ref|NC_008601.1|	RefSeq	gene	1075253	1075756	.	-	.	ID=gene1014;Name=FTN_1016;Dbxref=GeneID:4548298;gbkey=Gene;locus_tag=FTN_1016	1033	374	-0.848771	6.20107	0.000143089		-0.848771	0.555257	-0.255506
gi|118496615|ref|NC_008601.1|	RefSeq	gene	1075884	1076462	.	+	.	ID=gene1015;Name=FTN_1017;Note=stop codon;Dbxref=GeneID:4548299;gbkey=Gene;locus_tag=FTN_1017;pseudo=true	196	151	0.240314	4.26889	0.377554		0.240314	1.18125	0.0723416
gi|118496615|ref|NC_008601.1|	RefSeq	gene	1076556	1077254	.	+	.	ID=gene1016;Name=FTN_1018;Dbxref=GeneID:4548300;gbkey=Gene;locus_tag=FTN_1018	1373	371	-1.27083	6.25701	1.20102e-08		-1.27083	0.414422	-0.382557
gi|118496615|ref|NC_008601.1|	RefSeq	gene	1077269	1078405	.	+	.	ID=gene1017;Name=hdc;Dbxref=GeneID:4548301;gbkey=Gene;gene=hdc;locus_tag=FTN_1019	1472	636	-0.593814	6.60094	0.00617771		-0.593814	0.662589	-0.178756
gi|118496615|ref|NC_008601.1|	RefSeq	gene	1078392	1079204	.	-	.	ID=gene1018;Name=FTN_1020;Dbxref=GeneID:4548302;gbkey=Gene;locus_tag=FTN_1020	1747	609	-0.903467	6.56674	2.99713e-05		-0.903467	0.5346	-0.271971
gi|118496615|ref|NC_008601.1|	RefSeq	gene	1079294	1079830	.	+	.	ID=gene1019;Name=FTN_1021;Dbxref=GeneID:4548303;gbkey=Gene;locus_tag=FTN_1021	1355	1083	0.2935	8.45371	0.169383		0.2935	1.22561	0.0883524
gi|118496615|ref|NC_008601.1|	RefSeq	gene	1079866	1080162	.	+	.	ID=gene1020;Name=FTN_1022;Dbxref=GeneID:4548304;gbkey=Gene;locus_tag=FTN_1022	570	347	-0.0992094	7.46769	0.667291		-0.0992094	0.933544	-0.029865
gi|118496615|ref|NC_008601.1|	RefSeq	gene	1080184	1080771	.	-	.	ID=gene1021;Name=FTN_1023;Dbxref=GeneID:4548305;gbkey=Gene;locus_tag=FTN_1023	507	287	-0.20408	7.08863	0.383713		-0.20408	0.868092	-0.0614342
gi|118496615|ref|NC_008601.1|	RefSeq	gene	1080820	1082235	.	-	.	ID=gene1022;Name=FTN_1024;Dbxref=GeneID:4548306;gbkey=Gene;locus_tag=FTN_1024	2197	1000	-0.518702	7.43007	0.0145547		-0.518702	0.697999	-0.156145
gi|118496615|ref|NC_008601.1|	RefSeq	gene	1082261	1082911	.	-	.	ID=gene1023;Name=ruvA;Dbxref=GeneID:4548307;gbkey=Gene;gene=ruvA;locus_tag=FTN_1025	9733	11256	0.826518	9.72785	6.3251e-05		0.826518	1.7734	0.248807
gi|118496615|ref|NC_008601.1|	RefSeq	gene	1082924	1084117	.	-	.	ID=gene1024;Name=FTN_1026;Dbxref=GeneID:4548308;gbkey=Gene;locus_tag=FTN_1026	4041	2812	0.0936704	8.33341	0.6529		0.0936704	1.06708	0.0281976
gi|118496615|ref|NC_008601.1|	RefSeq	gene	1084199	1084714	.	-	.	ID=gene1025;Name=ruvC;Dbxref=GeneID:4548309;gbkey=Gene;gene=ruvC;locus_tag=FTN_1027	801	623	0.254175	7.06114	0.246454		0.254175	1.19265	0.0765144
gi|118496615|ref|NC_008601.1|	RefSeq	gene	1084811	1085557	.	-	.	ID=gene1026;Name=FTN_1028;Dbxref=GeneID:4548310;gbkey=Gene;locus_tag=FTN_1028	5461	5416	0.604838	9.24646	0.00346698		0.604838	1.52081	0.182075
gi|118496615|ref|NC_008601.1|	RefSeq	gene	1085573	1086232	.	-	.	ID=gene1027;Name=FTN_1029;Dbxref=GeneID:4548311;gbkey=Gene;locus_tag=FTN_1029	8498	8841	0.673866	9.688	0.00109406		0.673866	1.59534	0.202854
gi|118496615|ref|NC_008601.1|	RefSeq	gene	1086262	1087245	.	-	.	ID=gene1028;Name=lipA;Dbxref=GeneID:4547962;gbkey=Gene;gene=lipA;locus_tag=FTN_1030	6310	4862	0.240694	9.19384	0.243697		0.240694	1.18156	0.0724562
gi|118496615|ref|NC_008601.1|	RefSeq	gene	1087455	1087955	.	+	.	ID=gene1029;Name=ftnA;Dbxref=GeneID:4547963;gbkey=Gene;gene=ftnA;locus_tag=FTN_1031	547	291	-0.293642	5.71845	0.207089		-0.293642	0.81584	-0.0883951
gi|118496615|ref|NC_008601.1|	RefSeq	gene	1087958	1089430	.	-	.	ID=gene1030;Name=FTN_1032;Dbxref=GeneID:4547964;gbkey=Gene;locus_tag=FTN_1032	1195	510	-0.611555	6.71714	0.00529269		-0.611555	0.654491	-0.184097
gi|118496615|ref|NC_008601.1|	RefSeq	gene	1089601	1090245	.	+	.	ID=gene1031;Name=grxB;Dbxref=GeneID:4547965;gbkey=Gene;gene=grxB;locus_tag=FTN_1033	2936	1664	-0.202396	7.63139	0.33467		-0.202396	0.869106	-0.0609272
gi|118496615|ref|NC_008601.1|	RefSeq	gene	1090247	1090876	.	+	.	ID=gene1032;Name=rnfB;Dbxref=GeneID:4547966;gbkey=Gene;gene=rnfB;locus_tag=FTN_1034	2970	2189	0.17659	7.77494	0.398161		0.17659	1.13021	0.0531589
gi|118496615|ref|NC_008601.1|	RefSeq	gene	1090869	1091507	.	+	.	ID=gene1033;Name=nth;Dbxref=GeneID:4547967;gbkey=Gene;gene=nth;locus_tag=FTN_1035	3011	2112	0.105152	7.73403	0.615696		0.105152	1.07561	0.0316538
gi|118496615|ref|NC_008601.1|	RefSeq	gene	1091504	1091935	.	+	.	ID=gene1034;Name=FTN_1036;Dbxref=GeneID:4547968;gbkey=Gene;locus_tag=FTN_1036	3441	2177	-0.043695	7.78244	0.835725		-0.043695	0.970167	-0.0131535
gi|118496615|ref|NC_008601.1|	RefSeq	gene	1091935	1093194	.	+	.	ID=gene1035;Name=FTN_1037;Dbxref=GeneID:4547969;gbkey=Gene;locus_tag=FTN_1037	523	306	-0.156442	5.55436	0.497836		-0.156442	0.897235	-0.0470937
gi|118496615|ref|NC_008601.1|	RefSeq	gene	1093310	1093996	.	+	.	ID=gene1036;Name=FTN_1038;Dbxref=GeneID:4547970;gbkey=Gene;locus_tag=FTN_1038	8410	3578	-0.616149	9.42026	0.00292544		-0.616149	0.65241	-0.185479
gi|118496615|ref|NC_008601.1|	RefSeq	gene	1094041	1097466	.	+	.	ID=gene1037;Name=mfd;Dbxref=GeneID:4547971;gbkey=Gene;gene=mfd;locus_tag=FTN_1039	7689	3214	-0.641621	9.19675	0.00197175		-0.641621	0.640993	-0.193147
gi|118496615|ref|NC_008601.1|	RefSeq	gene	1097585	1098628	.	-	.	ID=gene1038;Name=ilvC;Dbxref=GeneID:4547972;gbkey=Gene;gene=ilvC;locus_tag=FTN_1040	15728	10544	0.0398762	10.5052	0.846252		0.0398762	1.02803	0.0120039
gi|118496615|ref|NC_008601.1|	RefSeq	gene	1098656	1098973	.	-	.	ID=gene1039;Name=ilvN;Dbxref=GeneID:4547973;gbkey=Gene;gene=ilvN;locus_tag=FTN_1041	25996	25102	0.566299	11.0747	0.00581877		0.566299	1.48072	0.170473
gi|118496615|ref|NC_008601.1|	RefSeq	gene	1098978	1100675	.	-	.	ID=gene1040;Name=ilvB;Dbxref=GeneID:4547974;gbkey=Gene;gene=ilvB;locus_tag=FTN_1042	41484	39437	0.543783	11.9408	0.00803138		0.543783	1.45779	0.163695
gi|118496615|ref|NC_008601.1|	RefSeq	gene	1100822	1102504	.	-	.	ID=gene1041;Name=ilvD;Dbxref=GeneID:4547975;gbkey=Gene;gene=ilvD;locus_tag=FTN_1043	11013	7982	0.152402	9.78249	0.458606		0.152402	1.11142	0.0458776
gi|118496615|ref|NC_008601.1|	RefSeq	gene	1102528	1104324	.	-	.	ID=gene1042;Name=FTN_1044;Dbxref=GeneID:4547976;gbkey=Gene;locus_tag=FTN_1044	17438	6856	-0.729998	9.98102	0.000404227		-0.729998	0.602905	-0.219751
gi|118496615|ref|NC_008601.1|	RefSeq	gene	1104467	1105060	.	-	.	ID=gene1043;Name=engB;Dbxref=GeneID:4547977;gbkey=Gene;gene=engB;gene_synonym=yihA,ysxC;locus_tag=FTN_1045	1736	784	-0.529996	6.9547	0.0133908		-0.529996	0.692557	-0.159545
gi|118496615|ref|NC_008601.1|	RefSeq	gene	1105057	1105542	.	-	.	ID=gene1044;Name=wzb;Dbxref=GeneID:4547978;gbkey=Gene;gene=wzb;locus_tag=FTN_1046	1849	803	-0.586425	7.12946	0.00613388		-0.586425	0.665991	-0.176531
gi|118496615|ref|NC_008601.1|	RefSeq	gene	1105543	1106469	.	-	.	ID=gene1045;Name=hflC;Dbxref=GeneID:4547979;gbkey=Gene;gene=hflC;locus_tag=FTN_1047	3140	1414	-0.534162	7.98271	0.0110207		-0.534162	0.69056	-0.160799
gi|118496615|ref|NC_008601.1|	RefSeq	gene	1106471	1107538	.	-	.	ID=gene1046;Name=hflK;Dbxref=GeneID:4547980;gbkey=Gene;gene=hflK;locus_tag=FTN_1048	3682	1970	-0.285491	8.38595	0.171431		-0.285491	0.820462	-0.0859415
gi|118496615|ref|NC_008601.1|	RefSeq	gene	1107723	1108901	.	+	.	ID=gene1047;Name=FTN_1049;Dbxref=GeneID:4547981;gbkey=Gene;locus_tag=FTN_1049	15139	5880	-0.747583	9.68623	0.000295947		-0.747583	0.595601	-0.225045
gi|118496615|ref|NC_008601.1|	RefSeq	gene	1108912	1110222	.	-	.	ID=gene1048;Name=hflX;Dbxref=GeneID:4547982;gbkey=Gene;gene=hflX;locus_tag=FTN_1050	11663	8687	0.191778	10.1162	0.350769		0.191778	1.14217	0.057731
gi|118496615|ref|NC_008601.1|	RefSeq	gene	1110271	1110600	.	-	.	ID=gene1049;Name=hfq;Dbxref=GeneID:4547983;gbkey=Gene;gene=hfq;locus_tag=FTN_1051	21444	15521	0.150436	10.5329	0.463049		0.150436	1.1099	0.0452858
gi|118496615|ref|NC_008601.1|	RefSeq	gene	1110711	1111637	.	-	.	ID=gene1050;Name=miaA;Dbxref=GeneID:4547984;gbkey=Gene;gene=miaA;locus_tag=FTN_1052	1078	1001	0.509814	6.6239	0.017583		0.509814	1.42387	0.153469
gi|118496615|ref|NC_008601.1|	RefSeq	gene	1111638	1113071	.	-	.	ID=gene1051;Name=FTN_1053;Dbxref=GeneID:4547985;gbkey=Gene;locus_tag=FTN_1053	8365	5448	-0.00184924	9.10189	0.99369		-0.00184924	0.998719	-0.000556678
gi|118496615|ref|NC_008601.1|	RefSeq	gene	1113184	1113456	.	-	.	ID=gene1052;Name=hupB;Dbxref=GeneID:4547986;gbkey=Gene;gene=hupB;locus_tag=FTN_1054	9986	8363	0.360898	9.5338	0.0794113		0.360898	1.28423	0.108641
gi|118496615|ref|NC_008601.1|	RefSeq	gene	1113543	1115867	.	-	.	ID=gene1053;Name=lon;Dbxref=GeneID:4547987;gbkey=Gene;gene=lon;locus_tag=FTN_1055	23531	16720	0.123801	10.8566	0.545812		0.123801	1.0896	0.0372678
gi|118496615|ref|NC_008601.1|	RefSeq	gene	1115892	1117145	.	-	.	ID=gene1054;Name=clpX;Dbxref=GeneID:4547988;gbkey=Gene;gene=clpX;locus_tag=FTN_1056	19073	12423	-0.0017286	10.5285	0.993649		-0.0017286	0.998803	-0.000520361
gi|118496615|ref|NC_008601.1|	RefSeq	gene	1117169	1117774	.	-	.	ID=gene1055;Name=clpP;Dbxref=GeneID:4547989;gbkey=Gene;gene=clpP;locus_tag=FTN_1057	8719	4877	-0.221375	9.61748	0.28303		-0.221375	0.857748	-0.0666405
gi|118496615|ref|NC_008601.1|	RefSeq	gene	1117800	1119116	.	-	.	ID=gene1056;Name=tig;Dbxref=GeneID:4547990;gbkey=Gene;gene=tig;locus_tag=FTN_1058	37085	17947	-0.430301	11.4181	0.0359038		-0.430301	0.742107	-0.129534
gi|118496615|ref|NC_008601.1|	RefSeq	gene	1119271	1119735	.	+	.	ID=gene1057;Name=FTN_1059;Dbxref=GeneID:4547991;gbkey=Gene;locus_tag=FTN_1059	635	349	-0.246676	6.04156	0.283172		-0.246676	0.842836	-0.0742568
gi|118496615|ref|NC_008601.1|	RefSeq	gene	1119778	1120371	.	-	.	ID=gene1058;Name=tdk;Dbxref=GeneID:4547992;gbkey=Gene;gene=tdk;locus_tag=FTN_1060	2500	1854	0.185492	7.62154	0.376679		0.185492	1.1372	0.0558387
gi|118496615|ref|NC_008601.1|	RefSeq	gene	1120387	1121136	.	-	.	ID=gene1059;Name=FTN_1061;Dbxref=GeneID:4547993;gbkey=Gene;locus_tag=FTN_1061	1032	754	0.16396	6.63159	0.452667		0.16396	1.12036	0.049357
gi|118496615|ref|NC_008601.1|	RefSeq	gene	1121316	1121990	.	-	.	ID=gene1060;Name=FTN_1062;Dbxref=GeneID:4547994;gbkey=Gene;locus_tag=FTN_1062	1182	701	-0.136936	6.60769	0.531872		-0.136936	0.909449	-0.0412218
gi|118496615|ref|NC_008601.1|	RefSeq	gene	1122215	1123543	.	+	.	ID=gene1061;Name=FTN_1063;Dbxref=GeneID:4547995;gbkey=Gene;locus_tag=FTN_1063	8949	4443	-0.393395	9.89079	0.0566526		-0.393395	0.761336	-0.118424
gi|118496615|ref|NC_008601.1|	RefSeq	gene	1123547	1124530	.	+	.	ID=gene1062;Name=FTN_1064;Dbxref=GeneID:4547996;gbkey=Gene;locus_tag=FTN_1064	7850	4342	-0.237538	9.14543	0.249843		-0.237538	0.848191	-0.0715062
gi|118496615|ref|NC_008601.1|	RefSeq	gene	1124523	1125011	.	+	.	ID=gene1063;Name=FTN_1065;Dbxref=GeneID:4547997;gbkey=Gene;locus_tag=FTN_1065	1759	846	-0.439192	6.90883	0.0399605		-0.439192	0.737547	-0.13221
gi|118496615|ref|NC_008601.1|	RefSeq	gene	1125001	1125843	.	+	.	ID=gene1064;Name=FTN_1066;Dbxref=GeneID:4547998;gbkey=Gene;locus_tag=FTN_1066	1740	692	-0.713374	6.87883	0.000921114		-0.713374	0.609892	-0.214747
gi|118496615|ref|NC_008601.1|	RefSeq	gene	1125843	1127333	.	+	.	ID=gene1065;Name=FTN_1067;Dbxref=GeneID:4547999;gbkey=Gene;locus_tag=FTN_1067	1568	715	-0.516061	7.17594	0.0164049		-0.516061	0.699278	-0.15535
gi|118496615|ref|NC_008601.1|	RefSeq	gene	1127581	1128003	.	+	.	ID=gene1066;Name=FTN_1068;Dbxref=GeneID:4548000;gbkey=Gene;locus_tag=FTN_1068	2219	347	-2.0598	6.56611	6.68174e-20		-2.0598	0.239849	-0.620062
gi|118496615|ref|NC_008601.1|	RefSeq	gene	1128155	1130653	.	-	.	ID=gene1067;Name=FTN_1069;Dbxref=GeneID:4547474;gbkey=Gene;locus_tag=FTN_1069	3418	1612	-0.467487	7.80811	0.025648		-0.467487	0.723223	-0.140728
gi|118496615|ref|NC_008601.1|	RefSeq	gene	1130861	1132213	.	-	.	ID=gene1068;Name=FTN_1070;Dbxref=GeneID:4547475;gbkey=Gene;locus_tag=FTN_1070	2423	892	-0.82482	7.1219	0.000107892		-0.82482	0.564553	-0.248295
gi|118496615|ref|NC_008601.1|	RefSeq	gene	1132421	1133899	.	-	.	ID=gene1069;Name=FTN_1071;Dbxref=GeneID:4547476;gbkey=Gene;locus_tag=FTN_1071	1497	656	-0.573446	6.60545	0.00784898		-0.573446	0.67201	-0.172624
gi|118496615|ref|NC_008601.1|	RefSeq	gene	1134341	1135204	.	+	.	ID=gene1070;Name=FTN_1072;Dbxref=GeneID:4547477;gbkey=Gene;locus_tag=FTN_1072	766	285	-0.809378	5.87234	0.000385698		-0.809378	0.570628	-0.243647
gi|118496615|ref|NC_008601.1|	RefSeq	gene	1135195	1136259	.	-	.	ID=gene1071;Name=FTN_1073;Dbxref=GeneID:4547478;gbkey=Gene;locus_tag=FTN_1073	3316	1553	-0.477571	7.782	0.0227431		-0.477571	0.718186	-0.143763
gi|118496615|ref|NC_008601.1|	RefSeq	gene	1136357	1138117	.	-	.	ID=gene1072;Name=FTN_1074;Dbxref=GeneID:4547479;gbkey=Gene;locus_tag=FTN_1074	25221	9417	-0.80449	10.4655	9.63752e-05		-0.80449	0.572564	-0.242176
gi|118496615|ref|NC_008601.1|	RefSeq	gene	1138169	1138876	.	-	.	ID=gene1073;Name=FTN_1075;Dbxref=GeneID:4547480;gbkey=Gene;locus_tag=FTN_1075	5645	2509	-0.553053	8.70272	0.00779855		-0.553053	0.681576	-0.166486
gi|118496615|ref|NC_008601.1|	RefSeq	gene	1138891	1140108	.	-	.	ID=gene1074;Name=ispG;Dbxref=GeneID:4547481;gbkey=Gene;gene=ispG;gene_synonym=gcpE;locus_tag=FTN_1076	10567	6703	-0.0398969	9.95884	0.846759		-0.0398969	0.972724	-0.0120102
gi|118496615|ref|NC_008601.1|	RefSeq	gene	1140193	1140939	.	+	.	ID=gene1075;Name=FTN_1077;Dbxref=GeneID:4547482;gbkey=Gene;locus_tag=FTN_1077	310	281	0.474894	5.46979	0.0475421		0.474894	1.38982	0.142957
gi|118496615|ref|NC_008601.1|	RefSeq	gene	1140939	1141115	.	-	.	ID=gene1076;Name=FTN_1078;Note=gene fragment;Dbxref=GeneID:4547483;gbkey=Gene;locus_tag=FTN_1078;pseudo=true	62	64	0.661299	3.66212	0.0509162		0.661299	1.58151	0.199071
gi|118496615|ref|NC_008601.1|	RefSeq	gene	1141285	1142637	.	-	.	ID=gene1077;Name=FTN_1079;Dbxref=GeneID:4547484;gbkey=Gene;locus_tag=FTN_1079	2283	1106	-0.428757	7.48049	0.0428398		-0.428757	0.742902	-0.129069
gi|118496615|ref|NC_008601.1|	RefSeq	gene	1142671	1143699	.	-	.	ID=gene1078;Name=FTN_1080;Dbxref=GeneID:4547485;gbkey=Gene;locus_tag=FTN_1080	4102	1617	-0.726183	7.92296	0.000531202		-0.726183	0.604501	-0.218603
gi|118496615|ref|NC_008601.1|	RefSeq	gene	1143901	1145175	.	+	.	ID=gene1079;Name=FTN_1081;Dbxref=GeneID:4547486;gbkey=Gene;locus_tag=FTN_1081	542	329	-0.103386	6.35986	0.66318		-0.103386	0.930846	-0.0311222
gi|118496615|ref|NC_008601.1|	RefSeq	gene	1145207	1146601	.	-	.	ID=gene1080;Name=FTN_1082;Dbxref=GeneID:4547487;gbkey=Gene;locus_tag=FTN_1082	456	296	-0.00664488	6.00511	1		-0.00664488	0.995405	-0.00200031
gi|118496615|ref|NC_008601.1|	RefSeq	gene	1146713	1147330	.	+	.	ID=gene1081;Name=FTN_1083;Dbxref=GeneID:4547488;gbkey=Gene;locus_tag=FTN_1083	711	355	-0.385147	5.84701	0.0898415		-0.385147	0.765701	-0.115941
gi|118496615|ref|NC_008601.1|	RefSeq	gene	1147417	1147587	.	+	.	ID=gene1082;Name=rubA;Dbxref=GeneID:4547489;gbkey=Gene;gene=rubA;locus_tag=FTN_1084	197	150	0.223397	5.30193	0.41397		0.223397	1.16748	0.0672493
gi|118496615|ref|NC_008601.1|	RefSeq	gene	1147596	1148468	.	+	.	ID=gene1083;Name=FTN_1085;Dbxref=GeneID:4547490;gbkey=Gene;locus_tag=FTN_1085	487	336	0.0813045	7.31871	0.730862		0.0813045	1.05797	0.0244751
gi|118496615|ref|NC_008601.1|	RefSeq	gene	1148532	1149137	.	+	.	ID=gene1084;Name=FTN_1086;Dbxref=GeneID:4547491;gbkey=Gene;locus_tag=FTN_1086	248	131	-0.303777	5.21524	0.247939		-0.303777	0.810128	-0.0914461
gi|118496615|ref|NC_008601.1|	RefSeq	gene	1149424	1150110	.	-	.	ID=gene1085;Name=cynT;Dbxref=GeneID:4547492;gbkey=Gene;gene=cynT;locus_tag=FTN_1087	1504	926	-0.0829223	7.20708	0.701474		-0.0829223	0.944143	-0.0249621
gi|118496615|ref|NC_008601.1|	RefSeq	gene	1150181	1151218	.	-	.	ID=gene1086;Name=ansA;Dbxref=GeneID:4548648;gbkey=Gene;gene=ansA;locus_tag=FTN_1088	3485	2694	0.245371	8.26804	0.238395		0.245371	1.1854	0.073864
gi|118496615|ref|NC_008601.1|	RefSeq	gene	1151220	1151678	.	-	.	ID=gene1087;Name=rnhA;Dbxref=GeneID:4548649;gbkey=Gene;gene=rnhA;locus_tag=FTN_1089	656	587	0.456364	6.38943	0.0391369		0.456364	1.37208	0.137379
gi|118496615|ref|NC_008601.1|	RefSeq	gene	1151653	1152243	.	-	.	ID=gene1088;Name=FTN_1090;Dbxref=GeneID:4548650;gbkey=Gene;locus_tag=FTN_1090	499	275	-0.242738	6.11667	0.295969		-0.242738	0.84514	-0.0730716
gi|118496615|ref|NC_008601.1|	RefSeq	gene	1152246	1153523	.	-	.	ID=gene1089;Name=aroA;Dbxref=GeneID:4548651;gbkey=Gene;gene=aroA;locus_tag=FTN_1091	2135	911	-0.61187	8.26439	0.00405474		-0.61187	0.654348	-0.184191
gi|118496615|ref|NC_008601.1|	RefSeq	gene	1153614	1154492	.	-	.	ID=gene1090;Name=rpoH;Dbxref=GeneID:4548652;gbkey=Gene;gene=rpoH;locus_tag=FTN_1092	6833	3622	-0.298936	9.09252	0.148293		-0.298936	0.812852	-0.0899886
gi|118496615|ref|NC_008601.1|	RefSeq	gene	1154516	1155004	.	-	.	ID=gene1091;Name=FTN_1093;Dbxref=GeneID:4548653;gbkey=Gene;locus_tag=FTN_1093	9416	3539	-0.794966	9.19184	0.000127161		-0.794966	0.576357	-0.239309
gi|118496615|ref|NC_008601.1|	RefSeq	gene	1155078	1156022	.	-	.	ID=gene1092;Name=secF;Dbxref=GeneID:4548654;gbkey=Gene;gene=secF;locus_tag=FTN_1094	2321	1062	-0.511133	7.639	0.015847		-0.511133	0.701671	-0.153866
gi|118496615|ref|NC_008601.1|	RefSeq	gene	1156041	1157978	.	-	.	ID=gene1093;Name=secD;Dbxref=GeneID:4548655;gbkey=Gene;gene=secD;locus_tag=FTN_1095	4529	1621	-0.865479	9.31185	3.70494e-05		-0.865479	0.548864	-0.260535
gi|118496615|ref|NC_008601.1|	RefSeq	gene	1158035	1158391	.	-	.	ID=gene1094;Name=yajC;Dbxref=GeneID:4548656;gbkey=Gene;gene=yajC;locus_tag=FTN_1096	865	241	-1.22654	7.37977	1.09494e-07		-1.22654	0.427341	-0.369225
gi|118496615|ref|NC_008601.1|	RefSeq	gene	1158943	1159515	.	-	.	ID=gene1095;Name=FTN_1097;Dbxref=GeneID:4548657;gbkey=Gene;locus_tag=FTN_1097	1792	901	-0.375146	6.94806	0.0787983		-0.375146	0.771027	-0.11293
gi|118496615|ref|NC_008601.1|	RefSeq	gene	1159527	1160402	.	-	.	ID=gene1096;Name=FTN_1098;Dbxref=GeneID:4548658;gbkey=Gene;locus_tag=FTN_1098	556	345	-0.071679	5.50817	0.75995		-0.071679	0.95153	-0.0215775
gi|118496615|ref|NC_008601.1|	RefSeq	gene	1160507	1161382	.	+	.	ID=gene1097;Name=FTN_1099;Dbxref=GeneID:4548659;gbkey=Gene;locus_tag=FTN_1099	352	199	-0.205922	5.73252	0.401928		-0.205922	0.866984	-0.0619888
gi|118496615|ref|NC_008601.1|	RefSeq	gene	1161389	1162492	.	-	.	ID=gene1098;Name=tgt;Dbxref=GeneID:4548660;gbkey=Gene;gene=tgt;locus_tag=FTN_1100	904	725	0.298403	7.80184	0.170014		0.298403	1.22978	0.0898282
gi|118496615|ref|NC_008601.1|	RefSeq	gene	1162957	1163790	.	-	.	ID=gene1099;Name=FTN_1101;Dbxref=GeneID:4548661;gbkey=Gene;locus_tag=FTN_1101	2905	2232	0.236577	7.71331	0.257379		0.236577	1.17819	0.0712168
gi|118496615|ref|NC_008601.1|	RefSeq	gene	1164373	1164603	.	+	.	ID=gene1100;Name=FTN_1102;Dbxref=GeneID:4548662;gbkey=Gene;locus_tag=FTN_1102	109	103	0.534486	3.60499	0.0690738		0.534486	1.44843	0.160896
gi|118496615|ref|NC_008601.1|	RefSeq	gene	1164644	1165492	.	-	.	ID=gene1101;Name=FTN_1103;Dbxref=GeneID:4548663;gbkey=Gene;locus_tag=FTN_1103	467	661	1.11777	5.98074	6.07247e-07		1.11777	2.17011	0.336481
gi|118496615|ref|NC_008601.1|	RefSeq	gene	1165519	1166067	.	-	.	ID=gene1102;Name=FTN_1104;Dbxref=GeneID:4548664;gbkey=Gene;locus_tag=FTN_1104	337	472	1.10248	5.46129	1.70172e-06		1.10248	2.14724	0.33188
gi|118496615|ref|NC_008601.1|	RefSeq	gene	1166699	1167313	.	+	.	ID=gene1103;Name=FTN_1105;Dbxref=GeneID:4548665;gbkey=Gene;locus_tag=FTN_1105	1811	988	-0.25739	6.99634	0.227126		-0.25739	0.8366	-0.0774823
gi|118496615|ref|NC_008601.1|	RefSeq	gene	1167276	1168352	.	+	.	ID=gene1104;Name=metN;Dbxref=GeneID:4548666;gbkey=Gene;gene=metN;locus_tag=FTN_1106	8081	4751	-0.14951	8.99386	0.468741		-0.14951	0.901557	-0.045007
gi|118496615|ref|NC_008601.1|	RefSeq	gene	1168330	1169802	.	+	.	ID=gene1105;Name=metlQ;Dbxref=GeneID:4548667;gbkey=Gene;gene=metlQ;locus_tag=FTN_1107	2576	1479	-0.183709	7.49459	0.382961		-0.183709	0.880436	-0.0553021
gi|118496615|ref|NC_008601.1|	RefSeq	gene	1169873	1171084	.	+	.	ID=gene1106;Name=FTN_1108;Dbxref=GeneID:4547889;gbkey=Gene;locus_tag=FTN_1108	657	333	-0.363486	5.772	0.11133		-0.363486	0.777284	-0.10942
gi|118496615|ref|NC_008601.1|	RefSeq	gene	1171158	1171907	.	+	.	ID=gene1107;Name=FTN_1109;Dbxref=GeneID:4547890;gbkey=Gene;locus_tag=FTN_1109	7213	2775	-0.761301	8.62042	0.000250549		-0.761301	0.589964	-0.229174
gi|118496615|ref|NC_008601.1|	RefSeq	gene	1171920	1172399	.	+	.	ID=gene1108;Name=ispF;Dbxref=GeneID:4547891;gbkey=Gene;gene=ispF;locus_tag=FTN_1110	3225	1589	-0.404369	7.7169	0.0536994		-0.404369	0.755567	-0.121727
gi|118496615|ref|NC_008601.1|	RefSeq	gene	1172404	1174089	.	-	.	ID=gene1109;Name=FTN_1111;Dbxref=GeneID:4547892;gbkey=Gene;locus_tag=FTN_1111	11482	5654	-0.405234	9.60778	0.0491939		-0.405234	0.755114	-0.121988
gi|118496615|ref|NC_008601.1|	RefSeq	gene	1174115	1176937	.	-	.	ID=gene1110;Name=cphA;Dbxref=GeneID:4547893;gbkey=Gene;gene=cphA;locus_tag=FTN_1112	107850	60217	-0.223994	12.6358	0.273454		-0.223994	0.856192	-0.0674288
gi|118496615|ref|NC_008601.1|	RefSeq	gene	1177061	1177804	.	+	.	ID=gene1111;Name=FTN_1113;Dbxref=GeneID:4547894;gbkey=Gene;locus_tag=FTN_1113	1222	713	-0.16046	6.58169	0.463937		-0.16046	0.89474	-0.0483032
gi|118496615|ref|NC_008601.1|	RefSeq	gene	1177793	1178545	.	-	.	ID=gene1112;Name=glpQ;Dbxref=GeneID:4547895;gbkey=Gene;gene=glpQ;locus_tag=FTN_1114	2634	1223	-0.490008	7.47009	0.0201998		-0.490008	0.712021	-0.147507
gi|118496615|ref|NC_008601.1|	RefSeq	gene	1178703	1180481	.	+	.	ID=gene1113;Name=pilB;Dbxref=GeneID:4547896;gbkey=Gene;gene=pilB;locus_tag=FTN_1115	5255	2895	-0.24333	8.52357	0.240754		-0.24333	0.844793	-0.0732497
gi|118496615|ref|NC_008601.1|	RefSeq	gene	1180496	1181725	.	+	.	ID=gene1114;Name=pilC;Dbxref=GeneID:4547897;gbkey=Gene;gene=pilC;locus_tag=FTN_1116	3732	2393	-0.024338	8.06624	0.908653		-0.024338	0.983272	-0.00732648
gi|118496615|ref|NC_008601.1|	RefSeq	gene	1181799	1182965	.	-	.	ID=gene1115;Name=FTN_1117;Dbxref=GeneID:4547898;gbkey=Gene;locus_tag=FTN_1117	2705	1930	0.129755	7.94326	0.536247		0.129755	1.09411	0.0390601
gi|118496615|ref|NC_008601.1|	RefSeq	gene	1182983	1183318	.	-	.	ID=gene1116;Name=FTN_1118;Dbxref=GeneID:4547899;gbkey=Gene;locus_tag=FTN_1118	1165	578	-0.39434	6.48433	0.0704488		-0.39434	0.760837	-0.118708
gi|118496615|ref|NC_008601.1|	RefSeq	gene	1183335	1183586	.	-	.	ID=gene1117;Name=FTN_1119;Dbxref=GeneID:4547900;gbkey=Gene;locus_tag=FTN_1119	2221	1094	-0.404775	7.00551	0.0560163		-0.404775	0.755354	-0.121849
gi|118496615|ref|NC_008601.1|	RefSeq	gene	1183729	1184730	.	+	.	ID=gene1118;Name=hemH;Dbxref=GeneID:4547901;gbkey=Gene;gene=hemH;locus_tag=FTN_1120	3663	1797	-0.410626	7.81064	0.0494719		-0.410626	0.752297	-0.123611
gi|118496615|ref|NC_008601.1|	RefSeq	gene	1184715	1186109	.	+	.	ID=gene1119;Name=phrB;Dbxref=GeneID:4547902;gbkey=Gene;gene=phrB;locus_tag=FTN_1121	3436	1703	-0.395842	7.72636	0.058557		-0.395842	0.760046	-0.11916
gi|118496615|ref|NC_008601.1|	RefSeq	gene	1186844	1187233	.	+	.	ID=gene1120;Name=FTN_1122;Dbxref=GeneID:4547903;gbkey=Gene;locus_tag=FTN_1122	2401	881	-0.829561	7.01231	9.91331e-05		-0.829561	0.5627	-0.249723
gi|118496615|ref|NC_008601.1|	RefSeq	gene	1187288	1187593	.	+	.	ID=gene1121;Name=FTN_1123;Dbxref=GeneID:4547904;gbkey=Gene;locus_tag=FTN_1123	1945	563	-1.17163	6.57652	7.42936e-08		-1.17163	0.443919	-0.352697
gi|118496615|ref|NC_008601.1|	RefSeq	gene	1187659	1187904	.	+	.	ID=gene1122;Name=FTN_1124;Dbxref=GeneID:4547905;gbkey=Gene;locus_tag=FTN_1124	1491	332	-1.54995	6.12611	5.87773e-12		-1.54995	0.341521	-0.466582
gi|118496615|ref|NC_008601.1|	RefSeq	gene	1188089	1188952	.	+	.	ID=gene1123;Name=FTN_1125;Dbxref=GeneID:4547906;gbkey=Gene;locus_tag=FTN_1125	1973	1109	-0.214324	7.09184	0.312948		-0.214324	0.86195	-0.064518
gi|118496615|ref|NC_008601.1|	RefSeq	gene	1188964	1189194	.	+	.	ID=gene1124;Name=chaB;Dbxref=GeneID:4547907;gbkey=Gene;gene=chaB;locus_tag=FTN_1126	356	273	0.233722	5.05345	0.333886		0.233722	1.17586	0.0703572
gi|118496615|ref|NC_008601.1|	RefSeq	gene	1189304	1190299	.	-	.	ID=gene1125;Name=galM;Dbxref=GeneID:4548705;gbkey=Gene;gene=galM;locus_tag=FTN_1127	2091	1393	0.0307896	7.42526	0.886667		0.0307896	1.02157	0.00926858
gi|118496615|ref|NC_008601.1|	RefSeq	gene	1190296	1191471	.	-	.	ID=gene1126;Name=dfp;Dbxref=GeneID:4548706;gbkey=Gene;gene=dfp;locus_tag=FTN_1128	2308	1462	-0.0419076	7.55141	0.844796		-0.0419076	0.97137	-0.0126154
gi|118496615|ref|NC_008601.1|	RefSeq	gene	1191484	1192668	.	-	.	ID=gene1127;Name=FTN_1129;Dbxref=GeneID:4548707;gbkey=Gene;locus_tag=FTN_1129	1791	758	-0.62364	6.96544	0.00363619		-0.62364	0.649031	-0.187734
gi|118496615|ref|NC_008601.1|	RefSeq	gene	1192744	1194252	.	-	.	ID=gene1128;Name=FTN_1130;Dbxref=GeneID:4548708;gbkey=Gene;locus_tag=FTN_1130	3314	968	-1.15862	7.8672	5.25759e-08		-1.15862	0.44794	-0.348781
gi|118496615|ref|NC_008601.1|	RefSeq	gene	1194413	1198477	.	-	.	ID=gene1129;Name=putA;Dbxref=GeneID:4548709;gbkey=Gene;gene=putA;locus_tag=FTN_1131	19593	15932	0.318376	10.7116	0.120622		0.318376	1.24693	0.0958409
gi|118496615|ref|NC_008601.1|	RefSeq	gene	1198494	1198781	.	-	.	ID=gene1130;Name=FTN_1132;Dbxref=GeneID:4548710;gbkey=Gene;locus_tag=FTN_1132	1185	778	0.00974332	6.459	0.969216		0.00974332	1.00678	0.00293303
gi|118496615|ref|NC_008601.1|	RefSeq	gene	1198995	1199378	.	+	.	ID=gene1131;Name=FTN_1133;Dbxref=GeneID:4548711;gbkey=Gene;locus_tag=FTN_1133	419	162	-0.753809	6.4868	0.00220657		-0.753809	0.593036	-0.226919
gi|118496615|ref|NC_008601.1|	RefSeq	gene	1199445	1199690	.	-	.	ID=gene1132;Name=FTN_1134;Dbxref=GeneID:4548712;gbkey=Gene;locus_tag=FTN_1134	195	80	-0.667953	6.00488	0.0189984		-0.667953	0.629399	-0.201074
gi|118496615|ref|NC_008601.1|	RefSeq	gene	1199726	1200805	.	-	.	ID=gene1133;Name=aroB;Dbxref=GeneID:4548713;gbkey=Gene;gene=aroB;locus_tag=FTN_1135	3385	2373	0.104341	9.41072	0.617475		0.104341	1.075	0.0314099
gi|118496615|ref|NC_008601.1|	RefSeq	gene	1200802	1201332	.	-	.	ID=gene1134;Name=aroK;Dbxref=GeneID:4548714;gbkey=Gene;gene=aroK;locus_tag=FTN_1136	5382	6080	0.792701	9.59914	0.000131323		0.792701	1.73232	0.238627
gi|118496615|ref|NC_008601.1|	RefSeq	gene	1201458	1203242	.	-	.	ID=gene1135;Name=pilQ;Dbxref=GeneID:4548715;gbkey=Gene;gene=pilQ;locus_tag=FTN_1137	8829	7599	0.400343	9.52897	0.0518854		0.400343	1.31982	0.120515
gi|118496615|ref|NC_008601.1|	RefSeq	gene	1203255	1203845	.	-	.	ID=gene1136;Name=pilP;Dbxref=GeneID:4548716;gbkey=Gene;gene=pilP;locus_tag=FTN_1138	1489	1215	0.323373	7.03863	0.128309		0.323373	1.25125	0.0973449
gi|118496615|ref|NC_008601.1|	RefSeq	gene	1203851	1204447	.	-	.	ID=gene1137;Name=pilO;Dbxref=GeneID:4548717;gbkey=Gene;gene=pilO;locus_tag=FTN_1139	651	307	-0.467501	6.06577	0.0417099		-0.467501	0.723216	-0.140732
gi|118496615|ref|NC_008601.1|	RefSeq	gene	1204441	1205004	.	-	.	ID=gene1138;Name=pilN;Dbxref=GeneID:4548718;gbkey=Gene;gene=pilN;locus_tag=FTN_1140	1382	1006	0.158646	7.2182	0.4596		0.158646	1.11624	0.0477571
gi|118496615|ref|NC_008601.1|	RefSeq	gene	1205006	1206010	.	-	.	ID=gene1139;Name=pilM;Dbxref=GeneID:4548719;gbkey=Gene;gene=pilM;locus_tag=FTN_1141	1731	1252	0.149406	7.79324	0.48219		0.149406	1.10911	0.0449757
gi|118496615|ref|NC_008601.1|	RefSeq	gene	1206137	1206793	.	+	.	ID=gene1140;Name=adk;Dbxref=GeneID:4548720;gbkey=Gene;gene=adk;locus_tag=FTN_1142	7781	3266	-0.635626	8.82471	0.0021679		-0.635626	0.643662	-0.191342
gi|118496615|ref|NC_008601.1|	RefSeq	gene	1207352	1210072	.	-	.	ID=gene1141;Name=FTN_1143;Dbxref=GeneID:4548721;gbkey=Gene;locus_tag=FTN_1143	4652	2060	-0.558395	8.34082	0.00740473		-0.558395	0.679057	-0.168094
gi|118496615|ref|NC_008601.1|	RefSeq	gene	1210133	1210549	.	-	.	ID=gene1142;Name=FTN_1144;Dbxref=GeneID:4548722;gbkey=Gene;locus_tag=FTN_1144	214	170	0.284531	4.9627	0.26696		0.284531	1.21801	0.0856523
gi|118496615|ref|NC_008601.1|	RefSeq	gene	1210564	1211457	.	-	.	ID=gene1143;Name=era;Dbxref=GeneID:4548723;gbkey=Gene;gene=era;gene_synonym=bex,rbaA,sdgE,yqfH;locus_tag=FTN_1145	847	414	-0.415856	6.35918	0.0625918		-0.415856	0.749575	-0.125185
gi|118496615|ref|NC_008601.1|	RefSeq	gene	1211571	1212764	.	-	.	ID=gene1144;Name=FTN_1146;Dbxref=GeneID:4548724;gbkey=Gene;locus_tag=FTN_1146	1624	942	-0.168946	7.65801	0.430336		-0.168946	0.889492	-0.0508579
gi|118496615|ref|NC_008601.1|	RefSeq	gene	1212774	1213580	.	-	.	ID=gene1145;Name=FTN_1147;Dbxref=GeneID:4548133;gbkey=Gene;locus_tag=FTN_1147	3544	3242	0.488277	8.22892	0.0188331		0.488277	1.40277	0.146986
gi|118496615|ref|NC_008601.1|	RefSeq	gene	1213584	1214222	.	-	.	ID=gene1146;Name=FTN_1148;Dbxref=GeneID:4548134;gbkey=Gene;locus_tag=FTN_1148	4399	4027	0.489305	8.44917	0.0182454		0.489305	1.40377	0.147296
gi|118496615|ref|NC_008601.1|	RefSeq	gene	1214226	1215359	.	-	.	ID=gene1147;Name=nagA;Dbxref=GeneID:4548135;gbkey=Gene;gene=nagA;locus_tag=FTN_1149	3693	2832	0.233809	8.18251	0.260824		0.233809	1.17594	0.0703834
gi|118496615|ref|NC_008601.1|	RefSeq	gene	1215422	1216294	.	+	.	ID=gene1148;Name=FTN_1150;Dbxref=GeneID:4548136;gbkey=Gene;locus_tag=FTN_1150	454	250	-0.243886	5.49563	0.304007		-0.243886	0.844468	-0.073417
gi|118496615|ref|NC_008601.1|	RefSeq	gene	1216361	1218109	.	+	.	ID=gene1149;Name=FTN_1151;Dbxref=GeneID:4548137;gbkey=Gene;locus_tag=FTN_1151	3355	1470	-0.573675	7.95593	0.00628304		-0.573675	0.671903	-0.172693
gi|118496615|ref|NC_008601.1|	RefSeq	gene	1218099	1219547	.	-	.	ID=gene1150;Name=FTN_1152;Dbxref=GeneID:4548138;gbkey=Gene;locus_tag=FTN_1152	2899	1688	-0.163442	7.85792	0.436215		-0.163442	0.892892	-0.0492009
gi|118496615|ref|NC_008601.1|	RefSeq	gene	1219528	1220226	.	-	.	ID=gene1151;Name=FTN_1153;Dbxref=GeneID:4548139;gbkey=Gene;locus_tag=FTN_1153	1378	778	-0.20792	6.46208	0.335375		-0.20792	0.865785	-0.0625901
gi|118496615|ref|NC_008601.1|	RefSeq	gene	1220793	1222016	.	-	.	ID=gene1152;Name=FTN_1154;Dbxref=GeneID:4548140;gbkey=Gene;locus_tag=FTN_1154	1767	1263	0.132331	7.09613	0.533733		0.132331	1.09606	0.0398357
gi|118496615|ref|NC_008601.1|	RefSeq	gene	1222621	1224969	.	-	.	ID=gene1153;Name=FTN_1155;Dbxref=GeneID:4548141;gbkey=Gene;locus_tag=FTN_1155	5283	4581	0.411084	8.75376	0.0468459		0.411084	1.32968	0.123749
gi|118496615|ref|NC_008601.1|	RefSeq	gene	1225102	1226655	.	-	.	ID=gene1154;Name=FTN_1156;Dbxref=GeneID:4548142;gbkey=Gene;locus_tag=FTN_1156	807	381	-0.465885	6.01778	0.0374863		-0.465885	0.724027	-0.140245
gi|118496615|ref|NC_008601.1|	RefSeq	gene	1227077	1228894	.	+	.	ID=gene1155;Name=FTN_1157;Dbxref=GeneID:4548143;gbkey=Gene;locus_tag=FTN_1157	11569	4845	-0.638896	9.71479	0.00198451		-0.638896	0.642204	-0.192327
gi|118496615|ref|NC_008601.1|	RefSeq	gene	1229066	1229821	.	+	.	ID=gene1156;Name=FTN_1158;Dbxref=GeneID:4548144;gbkey=Gene;locus_tag=FTN_1158	1747	782	-0.542792	7.03383	0.0113113		-0.542792	0.686441	-0.163397
gi|118496615|ref|NC_008601.1|	RefSeq	gene	1229837	1231642	.	-	.	ID=gene1157;Name=ggt;Dbxref=GeneID:4548145;gbkey=Gene;gene=ggt;locus_tag=FTN_1159	3099	1238	-0.706957	8.12496	0.000801214		-0.706957	0.612611	-0.212815
gi|118496615|ref|NC_008601.1|	RefSeq	gene	1231698	1232618	.	-	.	ID=gene1158;Name=FTN_1160;Dbxref=GeneID:4548146;gbkey=Gene;locus_tag=FTN_1160	1441	1650	0.81212	7.98436	0.000127914		0.81212	1.75579	0.244472
gi|118496615|ref|NC_008601.1|	RefSeq	gene	1232695	1233897	.	-	.	ID=gene1159;Name=FTN_1161;Dbxref=GeneID:4548147;gbkey=Gene;locus_tag=FTN_1161	685	486	0.121616	6.36036	0.595238		0.121616	1.08795	0.0366101
gi|118496615|ref|NC_008601.1|	RefSeq	gene	1233939	1234244	.	-	.	ID=gene1160;Name=FTN_1162;Dbxref=GeneID:4548148;gbkey=Gene;locus_tag=FTN_1162	762	798	0.683279	6.67297	0.00171034		0.683279	1.60579	0.205688
gi|118496615|ref|NC_008601.1|	RefSeq	gene	1234244	1234675	.	-	.	ID=gene1161;Name=FTN_1163;Dbxref=GeneID:4548149;gbkey=Gene;locus_tag=FTN_1163	605	435	0.140836	6.27205	0.536984		0.140836	1.10254	0.0423959
gi|118496615|ref|NC_008601.1|	RefSeq	gene	1234750	1235223	.	+	.	ID=gene1162;Name=smpB;Dbxref=GeneID:4548150;gbkey=Gene;gene=smpB;locus_tag=FTN_1164	1308	699	-0.287172	6.92548	0.185685		-0.287172	0.819507	-0.0864473
gi|118496615|ref|NC_008601.1|	RefSeq	gene	1235224	1235985	.	+	.	ID=gene1163;Name=FTN_1165;Dbxref=GeneID:4548151;gbkey=Gene;locus_tag=FTN_1165	4322	3053	0.115314	8.45028	0.579011		0.115314	1.08321	0.034713
gi|118496615|ref|NC_008601.1|	RefSeq	gene	1235986	1237257	.	-	.	ID=gene1164;Name=FTN_1166;Dbxref=GeneID:4548725;gbkey=Gene;locus_tag=FTN_1166	1002	756	0.210336	7.10661	0.337065		0.210336	1.15696	0.0633173
gi|118496615|ref|NC_008601.1|	RefSeq	gene	1237355	1237555	.	-	.	ID=gene1165;Name=FTN_1167;Dbxref=GeneID:4548726;gbkey=Gene;locus_tag=FTN_1167	668	557	0.354548	5.76085	0.110314		0.354548	1.27858	0.106729
gi|118496615|ref|NC_008601.1|	RefSeq	gene	1237539	1238924	.	-	.	ID=gene1166;Name=xseA;Dbxref=GeneID:4548727;gbkey=Gene;gene=xseA;locus_tag=FTN_1168	4128	2672	-0.010733	8.19081	0.960459		-0.010733	0.992588	-0.00323096
gi|118496615|ref|NC_008601.1|	RefSeq	gene	1239077	1240237	.	+	.	ID=gene1167;Name=FTN_1169;Dbxref=GeneID:4548728;gbkey=Gene;locus_tag=FTN_1169	1270	544	-0.606271	6.72309	0.00555955		-0.606271	0.656893	-0.182506
gi|118496615|ref|NC_008601.1|	RefSeq	gene	1240286	1242037	.	-	.	ID=gene1168;Name=FTN_1170;Dbxref=GeneID:4548729;gbkey=Gene;locus_tag=FTN_1170	10355	4767	-0.502376	9.23174	0.0149297		-0.502376	0.705943	-0.15123
gi|118496615|ref|NC_008601.1|	RefSeq	gene	1242054	1243040	.	-	.	ID=gene1169;Name=FTN_1171;Dbxref=GeneID:4548730;gbkey=Gene;locus_tag=FTN_1171	12346	6271	-0.360482	9.46339	0.0799103		-0.360482	0.778904	-0.108516
gi|118496615|ref|NC_008601.1|	RefSeq	gene	1243040	1244494	.	-	.	ID=gene1170;Name=FTN_1172;Dbxref=GeneID:4548731;gbkey=Gene;locus_tag=FTN_1172	56648	25987	-0.507444	11.5477	0.013356		-0.507444	0.703468	-0.152756
gi|118496615|ref|NC_008601.1|	RefSeq	gene	1244655	1245932	.	-	.	ID=gene1171;Name=FTN_1173;Dbxref=GeneID:4548732;gbkey=Gene;locus_tag=FTN_1173	890	737	0.344597	6.74476	0.115022		0.344597	1.2698	0.103734
gi|118496615|ref|NC_008601.1|	RefSeq	gene	1246023	1246820	.	-	.	ID=gene1172;Name=murI;Dbxref=GeneID:4548733;gbkey=Gene;gene=murI;locus_tag=FTN_1174	887	473	-0.29025	6.28457	0.192286		-0.29025	0.817761	-0.0873738
gi|118496615|ref|NC_008601.1|	RefSeq	gene	1246820	1247617	.	-	.	ID=gene1173;Name=FTN_1175;Dbxref=GeneID:4548734;gbkey=Gene;locus_tag=FTN_1175	1775	891	-0.377495	7.0387	0.0770677		-0.377495	0.769773	-0.113637
gi|118496615|ref|NC_008601.1|	RefSeq	gene	1247654	1249660	.	-	.	ID=gene1174;Name=uvrB;Dbxref=GeneID:4548735;gbkey=Gene;gene=uvrB;locus_tag=FTN_1176	4952	3190	-0.0176648	8.54157	0.933406		-0.0176648	0.98783	-0.00531763
gi|118496615|ref|NC_008601.1|	RefSeq	gene	1249662	1251110	.	-	.	ID=gene1175;Name=sbcB;Dbxref=GeneID:4548736;gbkey=Gene;gene=sbcB;locus_tag=FTN_1177	3589	1819	-0.363629	8.01735	0.081887		-0.363629	0.777207	-0.109463
gi|118496615|ref|NC_008601.1|	RefSeq	gene	1251244	1251966	.	-	.	ID=gene1176;Name=FTN_1178;Dbxref=GeneID:4548737;gbkey=Gene;locus_tag=FTN_1178	6801	9625	1.11781	9.45007	7.63802e-08		1.11781	2.17018	0.336495
gi|118496615|ref|NC_008601.1|	RefSeq	gene	1252082	1252981	.	+	.	ID=gene1177;Name=FTN_1179;Dbxref=GeneID:4548738;gbkey=Gene;locus_tag=FTN_1179	376	406	0.727307	5.93086	0.00167178		0.727307	1.65555	0.218941
gi|118496615|ref|NC_008601.1|	RefSeq	gene	1252992	1253897	.	-	.	ID=gene1178;Name=FTN_1180;Dbxref=GeneID:4548739;gbkey=Gene;locus_tag=FTN_1180	769	419	-0.259188	6.06524	0.248386		-0.259188	0.835558	-0.0780233
gi|118496615|ref|NC_008601.1|	RefSeq	gene	1253884	1254966	.	-	.	ID=gene1179;Name=FTN_1181;Dbxref=GeneID:4548740;gbkey=Gene;locus_tag=FTN_1181	893	410	-0.506144	6.12498	0.0226135		-0.506144	0.704102	-0.152365
gi|118496615|ref|NC_008601.1|	RefSeq	gene	1255109	1256992	.	+	.	ID=gene1180;Name=gidA;Dbxref=GeneID:4548741;gbkey=Gene;gene=gidA;locus_tag=FTN_1182	15799	9401	-0.132156	10.3347	0.5199		-0.132156	0.912467	-0.039783
gi|118496615|ref|NC_008601.1|	RefSeq	gene	1257004	1257396	.	+	.	ID=gene1181;Name=FTN_1183;Dbxref=GeneID:4548742;gbkey=Gene;locus_tag=FTN_1183	904	349	-0.75614	6.2832	0.000786851		-0.75614	0.592078	-0.227621
gi|118496615|ref|NC_008601.1|	RefSeq	gene	1257410	1258780	.	+	.	ID=gene1182;Name=FTN_1184;Dbxref=GeneID:4548743;gbkey=Gene;locus_tag=FTN_1184	2486	783	-1.04986	7.35273	9.44058e-07		-1.04986	0.483016	-0.316039
gi|118496615|ref|NC_008601.1|	RefSeq	gene	1258782	1259456	.	+	.	ID=gene1183;Name=rpiA;Dbxref=GeneID:4548744;gbkey=Gene;gene=rpiA;locus_tag=FTN_1185	1386	618	-0.548386	7.20661	0.011359		-0.548386	0.683785	-0.165081
gi|118496615|ref|NC_008601.1|	RefSeq	gene	1259504	1261567	.	-	.	ID=gene1184;Name=pepO;Dbxref=GeneID:4547607;gbkey=Gene;gene=pepO;locus_tag=FTN_1186	24599	10771	-0.574654	10.5762	0.00519849		-0.574654	0.671447	-0.172988
gi|118496615|ref|NC_008601.1|	RefSeq	gene	1261656	1262360	.	-	.	ID=gene1185;Name=FTN_1187;Dbxref=GeneID:4547608;gbkey=Gene;locus_tag=FTN_1187	4175	1853	-0.555099	8.84843	0.00787886		-0.555099	0.68061	-0.167102
gi|118496615|ref|NC_008601.1|	RefSeq	gene	1262402	1262758	.	-	.	ID=gene1186;Name=rplT;Dbxref=GeneID:4547609;gbkey=Gene;gene=rplT;locus_tag=FTN_1188	9336	5191	-0.229998	10.7089	0.264432		-0.229998	0.852636	-0.0692364
gi|118496615|ref|NC_008601.1|	RefSeq	gene	1262794	1262991	.	-	.	ID=gene1187;Name=rpmI;Dbxref=GeneID:4547610;gbkey=Gene;gene=rpmI;locus_tag=FTN_1189	12027	5453	-0.524357	10.7589	0.0110015		-0.524357	0.695269	-0.157847
gi|118496615|ref|NC_008601.1|	RefSeq	gene	1263034	1263570	.	-	.	ID=gene1188;Name=infC;Dbxref=GeneID:4547611;gbkey=Gene;gene=infC;locus_tag=FTN_1190	151300	111150	0.171885	13.5206	0.400472		0.171885	1.12653	0.0517426
gi|118496615|ref|NC_008601.1|	RefSeq	gene	1263577	1265481	.	-	.	ID=gene1189;Name=thrS;Dbxref=GeneID:4547612;gbkey=Gene;gene=thrS;locus_tag=FTN_1191	74300	38595	-0.328158	12.19	0.10894		-0.328158	0.796553	-0.0987854
gi|118496615|ref|NC_008601.1|	RefSeq	gene	1265920	1267710	.	+	.	ID=gene1190;Name=FTN_1192;Dbxref=GeneID:4547613;gbkey=Gene;locus_tag=FTN_1192	3828	1527	-0.709065	8.42613	0.000727187		-0.709065	0.611716	-0.21345
gi|118496615|ref|NC_008601.1|	RefSeq	gene	1267795	1268091	.	-	.	ID=gene1191;Name=FTN_1193;Dbxref=GeneID:4547614;gbkey=Gene;locus_tag=FTN_1193	460	117	-1.35759	5.74453	7.10954e-08		-1.35759	0.390233	-0.408677
gi|118496615|ref|NC_008601.1|	RefSeq	gene	1268081	1268461	.	-	.	ID=gene1192;Name=gcvH1;Dbxref=GeneID:4547615;gbkey=Gene;gene=gcvH1;locus_tag=FTN_1194	927	375	-0.688745	6.45411	0.00208383		-0.688745	0.620393	-0.207333
gi|118496615|ref|NC_008601.1|	RefSeq	gene	1268565	1269680	.	+	.	ID=gene1193;Name=murG;Dbxref=GeneID:4547616;gbkey=Gene;gene=murG;locus_tag=FTN_1195	2317	1188	-0.346908	7.50962	0.100757		-0.346908	0.786267	-0.10443
gi|118496615|ref|NC_008601.1|	RefSeq	gene	1269690	1270028	.	+	.	ID=gene1194;Name=FTN_1196;Dbxref=GeneID:4547617;gbkey=Gene;locus_tag=FTN_1196	2078	1015	-0.416891	7.45617	0.0496206		-0.416891	0.749037	-0.125497
gi|118496615|ref|NC_008601.1|	RefSeq	gene	1270028	1270630	.	+	.	ID=gene1195;Name=recR;Dbxref=GeneID:4547618;gbkey=Gene;gene=recR;locus_tag=FTN_1197	1835	961	-0.316353	7.82717	0.137629		-0.316353	0.803097	-0.0952317
gi|118496615|ref|NC_008601.1|	RefSeq	gene	1270638	1272752	.	-	.	ID=gene1196;Name=spoT;Dbxref=GeneID:4547619;gbkey=Gene;gene=spoT;locus_tag=FTN_1198	2734	1332	-0.420603	8.92866	0.0457352		-0.420603	0.747113	-0.126614
gi|118496615|ref|NC_008601.1|	RefSeq	gene	1272821	1274032	.	-	.	ID=gene1197;Name=FTN_1199;Dbxref=GeneID:4547620;gbkey=Gene;locus_tag=FTN_1199	2909	1430	-0.407694	9.00507	0.0523705		-0.407694	0.753827	-0.122728
gi|118496615|ref|NC_008601.1|	RefSeq	gene	1274034	1274498	.	-	.	ID=gene1198;Name=capC;Dbxref=GeneID:4547621;gbkey=Gene;gene=capC;locus_tag=FTN_1200	2862	1320	-0.499665	8.31567	0.0176194		-0.499665	0.707271	-0.150414
gi|118496615|ref|NC_008601.1|	RefSeq	gene	1274523	1275740	.	-	.	ID=gene1199;Name=capB;Dbxref=GeneID:4547622;gbkey=Gene;gene=capB;locus_tag=FTN_1201	6447	3253	-0.370058	9.7675	0.073891		-0.370058	0.773752	-0.111398
gi|118496615|ref|NC_008601.1|	RefSeq	gene	1275816	1277072	.	-	.	ID=gene1200;Name=FTN_1202;Dbxref=GeneID:4547623;gbkey=Gene;locus_tag=FTN_1202	2265	1675	0.181428	9.67016	0.388554		0.181428	1.13401	0.0546153
gi|118496615|ref|NC_008601.1|	RefSeq	gene	1277239	1277321	.	+	.	ID=gene1201;Name=FTN_1203;Dbxref=GeneID:4547624;gbkey=Gene;locus_tag=FTN_1203	251	134	-0.288472	7.06675	0.281011		-0.288472	0.818769	-0.0868388
gi|118496615|ref|NC_008601.1|	RefSeq	gene	1277328	1277403	.	+	.	ID=gene1202;Name=FTN_1204;Dbxref=GeneID:4547382;gbkey=Gene;locus_tag=FTN_1204	954	525	-0.24484	7.64847	0.267671		-0.24484	0.843909	-0.0737042
gi|118496615|ref|NC_008601.1|	RefSeq	gene	1277431	1277507	.	+	.	ID=gene1203;Name=FTN_1205;Dbxref=GeneID:4547383;gbkey=Gene;locus_tag=FTN_1205	918	526	-0.186609	7.66814	0.398636		-0.186609	0.878669	-0.0561749
gi|118496615|ref|NC_008601.1|	RefSeq	gene	1277516	1277592	.	+	.	ID=gene1204;Name=FTN_1206;Dbxref=GeneID:4547384;gbkey=Gene;locus_tag=FTN_1206	847	429	-0.364521	7.34636	0.10346		-0.364521	0.776727	-0.109732
gi|118496615|ref|NC_008601.1|	RefSeq	gene	1277610	1277685	.	+	.	ID=gene1205;Name=FTN_1207;Dbxref=GeneID:4547385;gbkey=Gene;locus_tag=FTN_1207	641	295	-0.502678	6.43335	0.0287067		-0.502678	0.705795	-0.151321
gi|118496615|ref|NC_008601.1|	RefSeq	gene	1277743	1278606	.	-	.	ID=gene1206;Name=ans;Dbxref=GeneID:4547386;gbkey=Gene;gene=ans;locus_tag=FTN_1208	1494	1751	0.845724	7.98114	6.52176e-05		0.845724	1.79717	0.254588
gi|118496615|ref|NC_008601.1|	RefSeq	gene	1278821	1279639	.	-	.	ID=gene1207;Name=cphB;Dbxref=GeneID:4547387;gbkey=Gene;gene=cphB;locus_tag=FTN_1209	1012	536	-0.300065	7.69463	0.17316		-0.300065	0.812216	-0.0903286
gi|118496615|ref|NC_008601.1|	RefSeq	gene	1279841	1280947	.	+	.	ID=gene1208;Name=FTN_1210;Dbxref=GeneID:4547388;gbkey=Gene;locus_tag=FTN_1210	1033	584	-0.205978	7.11594	0.347594		-0.205978	0.866951	-0.0620056
gi|118496615|ref|NC_008601.1|	RefSeq	gene	1281238	1281900	.	-	.	ID=gene1209;Name=FTN_1211;Dbxref=GeneID:4547389;gbkey=Gene;locus_tag=FTN_1211	753	569	0.212529	6.1712	0.33478		0.212529	1.15872	0.0639775
gi|118496615|ref|NC_008601.1|	RefSeq	gene	1281919	1282932	.	-	.	ID=gene1210;Name=FTN_1212;Dbxref=GeneID:4547390;gbkey=Gene;locus_tag=FTN_1212	788	418	-0.29784	6.11131	0.185891		-0.29784	0.81347	-0.0896587
gi|118496615|ref|NC_008601.1|	RefSeq	gene	1282935	1283942	.	-	.	ID=gene1211;Name=FTN_1213;Dbxref=GeneID:4547391;gbkey=Gene;locus_tag=FTN_1213	901	401	-0.551023	6.12145	0.0133585		-0.551023	0.682536	-0.165874
gi|118496615|ref|NC_008601.1|	RefSeq	gene	1283959	1284918	.	-	.	ID=gene1212;Name=FTN_1214;Dbxref=GeneID:4547392;gbkey=Gene;locus_tag=FTN_1214	919	425	-0.495715	6.07115	0.0255321		-0.495715	0.70921	-0.149225
gi|118496615|ref|NC_008601.1|	RefSeq	gene	1284952	1286112	.	-	.	ID=gene1213;Name=kpsC;Dbxref=GeneID:4547393;gbkey=Gene;gene=kpsC;locus_tag=FTN_1215	3235	1083	-0.961879	7.49874	5.63979e-06		-0.961879	0.513388	-0.289554
gi|118496615|ref|NC_008601.1|	RefSeq	gene	1286105	1286848	.	-	.	ID=gene1214;Name=FTN_1216;Dbxref=GeneID:4547394;gbkey=Gene;locus_tag=FTN_1216	1800	538	-1.12539	6.69106	2.49677e-07		-1.12539	0.458379	-0.338775
gi|118496615|ref|NC_008601.1|	RefSeq	gene	1286885	1288573	.	-	.	ID=gene1215;Name=FTN_1217;Dbxref=GeneID:4547395;gbkey=Gene;locus_tag=FTN_1217	1433	693	-0.431269	6.69027	0.0456558		-0.431269	0.741609	-0.129825
gi|118496615|ref|NC_008601.1|	RefSeq	gene	1288570	1289799	.	-	.	ID=gene1216;Name=FTN_1218;Dbxref=GeneID:4547396;gbkey=Gene;locus_tag=FTN_1218	1751	1017	-0.167055	7.0574	0.434007		-0.167055	0.890659	-0.0502884
gi|118496615|ref|NC_008601.1|	RefSeq	gene	1289803	1290822	.	-	.	ID=gene1217;Name=galE;Dbxref=GeneID:4548970;gbkey=Gene;gene=galE;locus_tag=FTN_1219	2945	1702	-0.174238	7.73534	0.406277		-0.174238	0.886236	-0.0524507
gi|118496615|ref|NC_008601.1|	RefSeq	gene	1290815	1292209	.	-	.	ID=gene1218;Name=FTN_1220;Dbxref=GeneID:4548971;gbkey=Gene;locus_tag=FTN_1220	1897	1099	-0.170724	7.31871	0.422421		-0.170724	0.888397	-0.0513931
gi|118496615|ref|NC_008601.1|	RefSeq	gene	1292190	1292858	.	-	.	ID=gene1219;Name=rpe;Dbxref=GeneID:4548972;gbkey=Gene;gene=rpe;locus_tag=FTN_1221	7475	2597	-0.908412	8.63635	1.30847e-05		-0.908412	0.532771	-0.273459
gi|118496615|ref|NC_008601.1|	RefSeq	gene	1292995	1293966	.	+	.	ID=gene1220;Name=kpsF;Dbxref=GeneID:4548973;gbkey=Gene;gene=kpsF;locus_tag=FTN_1222	2649	1191	-0.536448	7.55493	0.0110487		-0.536448	0.689466	-0.161487
gi|118496615|ref|NC_008601.1|	RefSeq	gene	1293970	1294560	.	-	.	ID=gene1221;Name=FTN_1223;Dbxref=GeneID:4548974;gbkey=Gene;locus_tag=FTN_1223	425	266	-0.0592255	5.76359	0.824989		-0.0592255	0.959779	-0.0178287
gi|118496615|ref|NC_008601.1|	RefSeq	gene	1294571	1295269	.	-	.	ID=gene1222;Name=FTN_1224;Dbxref=GeneID:4548975;gbkey=Gene;locus_tag=FTN_1224	274	271	0.600635	5.65214	0.0128017		0.600635	1.51638	0.180809
gi|118496615|ref|NC_008601.1|	RefSeq	gene	1295266	1296078	.	-	.	ID=gene1223;Name=FTN_1225;Dbxref=GeneID:4548976;gbkey=Gene;locus_tag=FTN_1225	454	341	0.203806	6.67437	0.378167		0.203806	1.15173	0.0613516
gi|118496615|ref|NC_008601.1|	RefSeq	gene	1296075	1296404	.	-	.	ID=gene1224;Name=FTN_1226;Dbxref=GeneID:4548977;gbkey=Gene;locus_tag=FTN_1226	192	133	0.0870429	5.68226	0.781239		0.0870429	1.06219	0.0262025
gi|118496615|ref|NC_008601.1|	RefSeq	gene	1296416	1297378	.	-	.	ID=gene1225;Name=FTN_1227;Dbxref=GeneID:4548978;gbkey=Gene;locus_tag=FTN_1227	453	264	-0.162126	7.2727	0.494816		-0.162126	0.893707	-0.0488049
gi|118496615|ref|NC_008601.1|	RefSeq	gene	1297525	1298307	.	-	.	ID=gene1226;Name=fabl;Dbxref=GeneID:4548979;gbkey=Gene;gene=fabl;locus_tag=FTN_1228	8980	5388	-0.120174	9.77594	0.560004		-0.120174	0.920077	-0.036176
gi|118496615|ref|NC_008601.1|	RefSeq	gene	1298595	1299308	.	+	.	ID=gene1227;Name=FTN_1229;Dbxref=GeneID:4548980;gbkey=Gene;locus_tag=FTN_1229	1168	653	-0.222065	7.29643	0.305717		-0.222065	0.857338	-0.0668481
gi|118496615|ref|NC_008601.1|	RefSeq	gene	1299556	1300131	.	-	.	ID=gene1228;Name=FTN_1230;Dbxref=GeneID:4548981;gbkey=Gene;locus_tag=FTN_1230	1055	841	0.289687	7.34829	0.180769		0.289687	1.22237	0.0872044
gi|118496615|ref|NC_008601.1|	RefSeq	gene	1300131	1300514	.	-	.	ID=gene1229;Name=gloA;Dbxref=GeneID:4548982;gbkey=Gene;gene=gloA;locus_tag=FTN_1231	1160	972	0.361651	7.02275	0.0920956		0.361651	1.2849	0.108868
gi|118496615|ref|NC_008601.1|	RefSeq	gene	1300558	1301343	.	+	.	ID=gene1230;Name=FTN_1232;Dbxref=GeneID:4548983;gbkey=Gene;locus_tag=FTN_1232	1895	851	-0.538125	7.368	0.0117392		-0.538125	0.688665	-0.161992
gi|118496615|ref|NC_008601.1|	RefSeq	gene	1301595	1302386	.	-	.	ID=gene1231;Name=FTN_1233;Dbxref=GeneID:4548984;gbkey=Gene;locus_tag=FTN_1233	1531	1200	0.265326	7.13395	0.212216		0.265326	1.20191	0.079871
gi|118496615|ref|NC_008601.1|	RefSeq	gene	1302509	1303525	.	-	.	ID=gene1232;Name=queA;Dbxref=GeneID:4548985;gbkey=Gene;gene=queA;locus_tag=FTN_1234	6019	5078	0.371518	8.8331	0.0720447		0.371518	1.29371	0.111838
gi|118496615|ref|NC_008601.1|	RefSeq	gene	1303551	1304012	.	-	.	ID=gene1233;Name=FTN_1235;Dbxref=GeneID:4548986;gbkey=Gene;locus_tag=FTN_1235	3470	2387	0.0770492	7.84989	0.712635		0.0770492	1.05486	0.0231941
gi|118496615|ref|NC_008601.1|	RefSeq	gene	1304034	1305269	.	-	.	ID=gene1234;Name=ubiF;Dbxref=GeneID:4548987;gbkey=Gene;gene=ubiF;locus_tag=FTN_1236	2874	1845	-0.0226485	7.77242	0.916082		-0.0226485	0.984424	-0.00681787
gi|118496615|ref|NC_008601.1|	RefSeq	gene	1305259	1306470	.	-	.	ID=gene1235;Name=ubiH;Dbxref=GeneID:4548988;gbkey=Gene;gene=ubiH;locus_tag=FTN_1237	2283	1715	0.204055	7.94879	0.331754		0.204055	1.15193	0.0614266
gi|118496615|ref|NC_008601.1|	RefSeq	gene	1306479	1307129	.	-	.	ID=gene1236;Name=FTN_1238;Dbxref=GeneID:4548989;gbkey=Gene;locus_tag=FTN_1238	1250	810	-0.00914361	6.74388	0.971515		-0.00914361	0.993682	-0.0027525
gi|118496615|ref|NC_008601.1|	RefSeq	gene	1307455	1308003	.	+	.	ID=gene1237;Name=FTN_1239;Dbxref=GeneID:4548038;gbkey=Gene;locus_tag=FTN_1239	5801	2542	-0.57353	8.25266	0.00579068		-0.57353	0.671971	-0.17265
gi|118496615|ref|NC_008601.1|	RefSeq	gene	1308006	1308272	.	+	.	ID=gene1238;Name=FTN_1240;Dbxref=GeneID:4548039;gbkey=Gene;locus_tag=FTN_1240	2752	1711	-0.0688473	7.40818	0.744423		-0.0688473	0.953399	-0.0207251
gi|118496615|ref|NC_008601.1|	RefSeq	gene	1308279	1308905	.	+	.	ID=gene1239;Name=FTN_1241;Dbxref=GeneID:4548040;gbkey=Gene;locus_tag=FTN_1241	749	322	-0.600965	5.77538	0.0083742		-0.600965	0.659313	-0.180908
gi|118496615|ref|NC_008601.1|	RefSeq	gene	1308961	1309608	.	+	.	ID=gene1240;Name=FTN_1242;Dbxref=GeneID:4548041;gbkey=Gene;locus_tag=FTN_1242	397	193	-0.423561	5.86776	0.0792283		-0.423561	0.745582	-0.127505
gi|118496615|ref|NC_008601.1|	RefSeq	gene	1309684	1310382	.	-	.	ID=gene1241;Name=recO;Dbxref=GeneID:4548042;gbkey=Gene;gene=recO;locus_tag=FTN_1243	422	229	-0.265002	5.61261	0.269936		-0.265002	0.832198	-0.0797734
gi|118496615|ref|NC_008601.1|	RefSeq	gene	1310366	1310695	.	-	.	ID=gene1242;Name=FTN_1244;Dbxref=GeneID:4548043;gbkey=Gene;locus_tag=FTN_1244	709	485	0.0689743	5.89158	0.763587		0.0689743	1.04897	0.0207633
gi|118496615|ref|NC_008601.1|	RefSeq	gene	1310688	1311863	.	-	.	ID=gene1243;Name=iscS;Dbxref=GeneID:4548044;gbkey=Gene;gene=iscS;locus_tag=FTN_1245	5184	3689	0.12595	8.58904	0.543267		0.12595	1.09123	0.0379148
gi|118496615|ref|NC_008601.1|	RefSeq	gene	1312113	1314770	.	+	.	ID=gene1244;Name=rne;Dbxref=GeneID:4548045;gbkey=Gene;gene=rne;locus_tag=FTN_1246	22159	15887	0.136743	10.9087	0.504714		0.136743	1.09942	0.0411636
gi|118496615|ref|NC_008601.1|	RefSeq	gene	1314785	1315591	.	+	.	ID=gene1245;Name=lgt;Dbxref=GeneID:4548046;gbkey=Gene;gene=lgt;locus_tag=FTN_1247	4346	3152	0.153364	8.54964	0.460096		0.153364	1.11216	0.0461671
gi|118496615|ref|NC_008601.1|	RefSeq	gene	1315576	1316400	.	+	.	ID=gene1246;Name=thyA;Dbxref=GeneID:4548047;gbkey=Gene;gene=thyA;locus_tag=FTN_1248	4928	3667	0.190382	8.5438	0.358011		0.190382	1.14107	0.0573107
gi|118496615|ref|NC_008601.1|	RefSeq	gene	1316412	1317647	.	+	.	ID=gene1247;Name=serA;Dbxref=GeneID:4548048;gbkey=Gene;gene=serA;locus_tag=FTN_1249	4222	2718	-0.0185909	8.16995	0.930249		-0.0185909	0.987196	-0.00559642
gi|118496615|ref|NC_008601.1|	RefSeq	gene	1317648	1318844	.	+	.	ID=gene1248;Name=FTN_1250;Dbxref=GeneID:4548049;gbkey=Gene;locus_tag=FTN_1250	1344	716	-0.291676	6.55535	0.178225		-0.291676	0.816953	-0.0878031
gi|118496615|ref|NC_008601.1|	RefSeq	gene	1318852	1320288	.	-	.	ID=gene1249;Name=FTN_1251;Dbxref=GeneID:4548050;gbkey=Gene;locus_tag=FTN_1251	860	499	-0.168476	6.19336	0.4523		-0.168476	0.889782	-0.0507163
gi|118496615|ref|NC_008601.1|	RefSeq	gene	1320488	1321633	.	+	.	ID=gene1250;Name=FTN_1252;Dbxref=GeneID:4548051;gbkey=Gene;locus_tag=FTN_1252	1754	886	-0.368444	6.98688	0.0845397		-0.368444	0.774617	-0.110913
gi|118496615|ref|NC_008601.1|	RefSeq	gene	1321634	1322698	.	-	.	ID=gene1251;Name=lpcC;Dbxref=GeneID:4548052;gbkey=Gene;gene=lpcC;locus_tag=FTN_1253	597	360	-0.112915	6.15099	0.62887		-0.112915	0.924718	-0.0339907
gi|118496615|ref|NC_008601.1|	RefSeq	gene	1322868	1323956	.	+	.	ID=gene1252;Name=FTN_1254;Dbxref=GeneID:4548053;gbkey=Gene;locus_tag=FTN_1254	1431	503	-0.891473	6.32996	4.70257e-05		-0.891473	0.539063	-0.26836
gi|118496615|ref|NC_008601.1|	RefSeq	gene	1323964	1324854	.	+	.	ID=gene1253;Name=FTN_1255;Dbxref=GeneID:4548054;gbkey=Gene;locus_tag=FTN_1255	2041	969	-0.457878	6.90893	0.0312855		-0.457878	0.728056	-0.137835
gi|118496615|ref|NC_008601.1|	RefSeq	gene	1324880	1326250	.	-	.	ID=gene1254;Name=FTN_1256;Dbxref=GeneID:4548055;gbkey=Gene;locus_tag=FTN_1256	909	352	-0.751751	6.06936	0.000808459		-0.751751	0.593882	-0.2263
gi|118496615|ref|NC_008601.1|	RefSeq	gene	1326405	1327676	.	+	.	ID=gene1255;Name=FTN_1257;Dbxref=GeneID:4548056;gbkey=Gene;locus_tag=FTN_1257	608	369	-0.103634	5.75533	0.654944		-0.103634	0.930686	-0.031197
gi|118496615|ref|NC_008601.1|	RefSeq	gene	1327691	1328239	.	-	.	ID=gene1256;Name=FTN_1258;Dbxref=GeneID:4547701;gbkey=Gene;locus_tag=FTN_1258	269	104	-0.753676	4.62086	0.00464459		-0.753676	0.59309	-0.226879
gi|118496615|ref|NC_008601.1|	RefSeq	gene	1328343	1329596	.	+	.	ID=gene1257;Name=glyA;Dbxref=GeneID:4547702;gbkey=Gene;gene=glyA;locus_tag=FTN_1259	3348	2420	0.148491	8.38574	0.476603		0.148491	1.10841	0.0447002
gi|118496615|ref|NC_008601.1|	RefSeq	gene	1329874	1331328	.	+	.	ID=gene1258;Name=FTN_1260;Dbxref=GeneID:4547703;gbkey=Gene;locus_tag=FTN_1260	829	662	0.2922	8.8115	0.183231		0.2922	1.22451	0.0879611
gi|118496615|ref|NC_008601.1|	RefSeq	gene	1331640	1333127	.	+	.	ID=gene1259;Name=FTN_1261;Dbxref=GeneID:4547704;gbkey=Gene;locus_tag=FTN_1261	1971	830	-0.630894	7.36016	0.00314649		-0.630894	0.645776	-0.189918
gi|118496615|ref|NC_008601.1|	RefSeq	gene	1333171	1334967	.	-	.	ID=gene1260;Name=mreA;Dbxref=GeneID:4547705;gbkey=Gene;gene=mreA;locus_tag=FTN_1262	1155	709	-0.087234	7.42024	0.689342		-0.087234	0.941326	-0.02626
gi|118496615|ref|NC_008601.1|	RefSeq	gene	1335075	1335899	.	-	.	ID=gene1261;Name=comL;Dbxref=GeneID:4547706;gbkey=Gene;gene=comL;locus_tag=FTN_1263	1285	713	-0.232975	7.10328	0.283892		-0.232975	0.850878	-0.0701325
gi|118496615|ref|NC_008601.1|	RefSeq	gene	1335988	1336986	.	+	.	ID=gene1262;Name=rluD;Dbxref=GeneID:4547707;gbkey=Gene;gene=rluD;locus_tag=FTN_1264	1837	1092	-0.133578	7.11631	0.531175		-0.133578	0.911568	-0.0402109
gi|118496615|ref|NC_008601.1|	RefSeq	gene	1336964	1337776	.	+	.	ID=gene1263;Name=FTN_1265;Dbxref=GeneID:4547708;gbkey=Gene;locus_tag=FTN_1265	848	439	-0.332987	5.93441	0.135158		-0.332987	0.793891	-0.100239
gi|118496615|ref|NC_008601.1|	RefSeq	gene	1337851	1338951	.	+	.	ID=gene1264;Name=FTN_1266;Dbxref=GeneID:4547709;gbkey=Gene;locus_tag=FTN_1266	1714	737	-0.600775	6.74777	0.00514849		-0.600775	0.6594	-0.180851
gi|118496615|ref|NC_008601.1|	RefSeq	gene	1338966	1339727	.	+	.	ID=gene1265;Name=FTN_1267;Dbxref=GeneID:4547710;gbkey=Gene;locus_tag=FTN_1267	1144	623	-0.259956	6.26162	0.23063		-0.259956	0.835114	-0.0782545
gi|118496615|ref|NC_008601.1|	RefSeq	gene	1339737	1340462	.	+	.	ID=gene1266;Name=FTN_1268;Dbxref=GeneID:4547711;gbkey=Gene;locus_tag=FTN_1268	1719	814	-0.461631	6.78643	0.0310727		-0.461631	0.726165	-0.138965
gi|118496615|ref|NC_008601.1|	RefSeq	gene	1340467	1341165	.	+	.	ID=gene1267;Name=FTN_1269;Dbxref=GeneID:4547712;gbkey=Gene;locus_tag=FTN_1269	5678	2089	-0.825751	8.24345	7.67968e-05		-0.825751	0.564188	-0.248576
gi|118496615|ref|NC_008601.1|	RefSeq	gene	1341155	1341841	.	-	.	ID=gene1268;Name=FTN_1270;Dbxref=GeneID:4547713;gbkey=Gene;locus_tag=FTN_1270	2268	1322	-0.161897	7.44346	0.443915		-0.161897	0.893849	-0.048736
gi|118496615|ref|NC_008601.1|	RefSeq	gene	1341912	1342640	.	+	.	ID=gene1269;Name=FTN_1271;Dbxref=GeneID:4547714;gbkey=Gene;locus_tag=FTN_1271	1364	768	-0.211851	6.44478	0.32656		-0.211851	0.863429	-0.0637734
gi|118496615|ref|NC_008601.1|	RefSeq	gene	1342876	1344360	.	+	.	ID=gene1270;Name=FTN_1272;Dbxref=GeneID:4547715;gbkey=Gene;locus_tag=FTN_1272	1817	1021	-0.214767	7.47886	0.3135		-0.214767	0.861685	-0.0646512
gi|118496615|ref|NC_008601.1|	RefSeq	gene	1344468	1346159	.	+	.	ID=gene1271;Name=FTN_1273;Dbxref=GeneID:4547716;gbkey=Gene;locus_tag=FTN_1273	1604	892	-0.229745	7.22191	0.283489		-0.229745	0.852785	-0.0691603
gi|118496615|ref|NC_008601.1|	RefSeq	gene	1346147	1346974	.	-	.	ID=gene1272;Name=FTN_1274;Dbxref=GeneID:4547717;gbkey=Gene;locus_tag=FTN_1274	627	454	0.150982	6.34085	0.50418		0.150982	1.11032	0.0454501
gi|118496615|ref|NC_008601.1|	RefSeq	gene	1347139	1348668	.	+	.	ID=gene1273;Name=FTN_1275;Dbxref=GeneID:4547718;gbkey=Gene;locus_tag=FTN_1275	1478	812	-0.247277	7.47046	0.250166		-0.247277	0.842485	-0.0744379
gi|118496615|ref|NC_008601.1|	RefSeq	gene	1348690	1349715	.	+	.	ID=gene1274;Name=FTN_1276;Dbxref=GeneID:4547719;gbkey=Gene;locus_tag=FTN_1276	3861	3970	0.656933	8.4391	0.00156765		0.656933	1.57673	0.197757
gi|118496615|ref|NC_008601.1|	RefSeq	gene	1349725	1351197	.	+	.	ID=gene1275;Name=FTN_1277;Dbxref=GeneID:4547720;gbkey=Gene;locus_tag=FTN_1277	2647	2440	0.499288	7.98436	0.0168586		0.499288	1.41352	0.150301
gi|118496615|ref|NC_008601.1|	RefSeq	gene	1351324	1352073	.	+	.	ID=gene1276;Name=nadE;Dbxref=GeneID:4547625;gbkey=Gene;gene=nadE;locus_tag=FTN_1278	772	551	0.130217	6.953	0.55868		0.130217	1.09446	0.0391991
gi|118496615|ref|NC_008601.1|	RefSeq	gene	1352177	1352599	.	+	.	ID=gene1277;Name=FTN_1279;Dbxref=GeneID:4547626;gbkey=Gene;locus_tag=FTN_1279	442	261	-0.143155	6.5296	0.559379		-0.143155	0.905536	-0.0430941
gi|118496615|ref|NC_008601.1|	RefSeq	gene	1352699	1353265	.	-	.	ID=gene1278;Name=FTN_1280;Dbxref=GeneID:4547627;gbkey=Gene;locus_tag=FTN_1280	455	370	0.318353	6.77395	0.170137		0.318353	1.24691	0.0958339
gi|118496615|ref|NC_008601.1|	RefSeq	gene	1353280	1353978	.	-	.	ID=gene1279;Name=FTN_1281;Dbxref=GeneID:4547628;gbkey=Gene;locus_tag=FTN_1281	392	235	-0.121354	6.13819	0.614301		-0.121354	0.919324	-0.0365313
gi|118496615|ref|NC_008601.1|	RefSeq	gene	1354079	1354975	.	+	.	ID=gene1280;Name=FTN_1282;Dbxref=GeneID:4547629;gbkey=Gene;locus_tag=FTN_1282	863	475	-0.244597	7.1665	0.269432		-0.244597	0.844052	-0.073631
gi|118496615|ref|NC_008601.1|	RefSeq	gene	1354989	1356176	.	-	.	ID=gene1281;Name=dnaJ;Dbxref=GeneID:4547630;gbkey=Gene;gene=dnaJ;locus_tag=FTN_1283	7173	5592	0.257572	9.97409	0.211631		0.257572	1.19547	0.077537
gi|118496615|ref|NC_008601.1|	RefSeq	gene	1356202	1358130	.	-	.	ID=gene1282;Name=dnaK;Dbxref=GeneID:4547631;gbkey=Gene;gene=dnaK;locus_tag=FTN_1284	41284	28734	0.0939653	12.5701	0.646191		0.0939653	1.0673	0.0282864
gi|118496615|ref|NC_008601.1|	RefSeq	gene	1358231	1358818	.	-	.	ID=gene1283;Name=grpE;Dbxref=GeneID:4547632;gbkey=Gene;gene=grpE;locus_tag=FTN_1285	13321	6243	-0.476595	9.92813	0.0206785		-0.476595	0.718672	-0.143469
gi|118496615|ref|NC_008601.1|	RefSeq	gene	1358907	1360073	.	+	.	ID=gene1284;Name=mltA;Dbxref=GeneID:4547633;gbkey=Gene;gene=mltA;locus_tag=FTN_1286	1913	1073	-0.217379	7.22671	0.306664		-0.217379	0.860127	-0.0654375
gi|118496615|ref|NC_008601.1|	RefSeq	gene	1360066	1361250	.	+	.	ID=gene1285;Name=hemG;Dbxref=GeneID:4547634;gbkey=Gene;gene=hemG;locus_tag=FTN_1287	1828	906	-0.395856	6.92503	0.0634986		-0.395856	0.760038	-0.119164
gi|118496615|ref|NC_008601.1|	RefSeq	gene	1361389	1361817	.	+	.	ID=gene1286;Name=rplM;Dbxref=GeneID:4547635;gbkey=Gene;gene=rplM;locus_tag=FTN_1288	10580	7358	0.0928342	11.1645	0.651963		0.0928342	1.06646	0.0279459
gi|118496615|ref|NC_008601.1|	RefSeq	gene	1361833	1362222	.	+	.	ID=gene1287;Name=rpsI;Dbxref=GeneID:4547636;gbkey=Gene;gene=rpsI;locus_tag=FTN_1289	20131	16996	0.372564	11.6134	0.0693691		0.372564	1.29465	0.112153
gi|118496615|ref|NC_008601.1|	RefSeq	gene	1362282	1362899	.	+	.	ID=gene1288;Name=mglA;Dbxref=GeneID:4547637;gbkey=Gene;gene=mglA;locus_tag=FTN_1290	3437	2135	-0.0701211	10.0647	0.738187		-0.0701211	0.952558	-0.0211085
gi|118496615|ref|NC_008601.1|	RefSeq	gene	1362901	1363308	.	+	.	ID=gene1289;Name=mglB;Dbxref=GeneID:4547638;gbkey=Gene;gene=mglB;locus_tag=FTN_1291	1786	1121	-0.0551515	8.91919	0.798199		-0.0551515	0.962493	-0.0166022
gi|118496615|ref|NC_008601.1|	RefSeq	gene	1363305	1364576	.	-	.	ID=gene1290;Name=FTN_1292;Dbxref=GeneID:4547639;gbkey=Gene;locus_tag=FTN_1292	741	448	-0.109162	8.22309	0.626954		-0.109162	0.927126	-0.0328611
gi|118496615|ref|NC_008601.1|	RefSeq	gene	1364577	1365134	.	-	.	ID=gene1291;Name=rnhB;Dbxref=GeneID:4547640;gbkey=Gene;gene=rnhB;locus_tag=FTN_1293	1705	1301	0.22662	7.46354	0.285226		0.22662	1.17009	0.0682195
gi|118496615|ref|NC_008601.1|	RefSeq	gene	1365136	1365879	.	-	.	ID=gene1292;Name=FTN_1294;Dbxref=GeneID:4547641;gbkey=Gene;locus_tag=FTN_1294	3663	2478	0.0529379	8.31587	0.800553		0.0529379	1.03738	0.0159359
gi|118496615|ref|NC_008601.1|	RefSeq	gene	1365872	1366327	.	-	.	ID=gene1293;Name=ptsN;Dbxref=GeneID:4547642;gbkey=Gene;gene=ptsN;locus_tag=FTN_1295	1596	779	-0.41793	7.37648	0.051524		-0.41793	0.748498	-0.125809
gi|118496615|ref|NC_008601.1|	RefSeq	gene	1366364	1366660	.	-	.	ID=gene1294;Name=FTN_1296;Dbxref=GeneID:4547643;gbkey=Gene;locus_tag=FTN_1296	8076	5239	-0.00755975	9.15755	0.9716		-0.00755975	0.994774	-0.00227571
gi|118496615|ref|NC_008601.1|	RefSeq	gene	1366779	1367024	.	+	.	ID=gene1295;Name=FTN_1297;Dbxref=GeneID:4548424;gbkey=Gene;locus_tag=FTN_1297	524	311	-0.135822	5.46149	0.573424		-0.135822	0.910151	-0.0408864
gi|118496615|ref|NC_008601.1|	RefSeq	gene	1367030	1368382	.	+	.	ID=gene1296;Name=trmE;Dbxref=GeneID:4548425;gbkey=Gene;gene=trmE;gene_synonym=mnmE,thdF;locus_tag=FTN_1298	3121	2014	-0.0151544	8.34007	0.944312		-0.0151544	0.989551	-0.00456192
gi|118496615|ref|NC_008601.1|	RefSeq	gene	1368392	1368586	.	-	.	ID=gene1297;Name=FTN_1299;Dbxref=GeneID:4548426;gbkey=Gene;locus_tag=FTN_1299	116	62	-0.286582	5.12687	0.369136		-0.286582	0.819842	-0.0862696
gi|118496615|ref|NC_008601.1|	RefSeq	gene	1368607	1369497	.	-	.	ID=gene1298;Name=FTN_1300;Dbxref=GeneID:4548427;gbkey=Gene;locus_tag=FTN_1300	813	341	-0.636545	7.10941	0.00476542		-0.636545	0.643252	-0.191619
gi|118496615|ref|NC_008601.1|	RefSeq	gene	1369632	1370687	.	+	.	ID=gene1299;Name=FTN_1301;Dbxref=GeneID:4548428;gbkey=Gene;locus_tag=FTN_1301	351	328	0.518826	6.97729	0.027397		0.518826	1.43279	0.156182
gi|118496615|ref|NC_008601.1|	RefSeq	gene	1370906	1371829	.	+	.	ID=gene1300;Name=cysK;Dbxref=GeneID:4548429;gbkey=Gene;gene=cysK;locus_tag=FTN_1302	1118	386	-0.917284	7.536	3.85217e-05		-0.917284	0.529505	-0.27613
gi|118496615|ref|NC_008601.1|	RefSeq	gene	1372091	1372660	.	+	.	ID=gene1301;Name=FTN_1303;Dbxref=GeneID:4548430;gbkey=Gene;locus_tag=FTN_1303	6775	1963	-1.17033	9.11441	2.48328e-08		-1.17033	0.444319	-0.352305
gi|118496615|ref|NC_008601.1|	RefSeq	gene	1373036	1373150	.	-	.	ID=gene1302;Name=FTN_1304;Dbxref=GeneID:4548431;gbkey=Gene;locus_tag=FTN_1304	74	66	0.450939	2.70305	0.172851		0.450939	1.36693	0.135746
gi|118496615|ref|NC_008601.1|	RefSeq	gene	1373201	1376062	.	-	.	ID=gene1303;Name=FTN_1305;Dbxref=GeneID:4548432;gbkey=Gene;locus_tag=FTN_1305	19799	6668	-0.953302	9.93629	4.1441e-06		-0.953302	0.516449	-0.286972
gi|118496615|ref|NC_008601.1|	RefSeq	gene	1376136	1376211	.	+	.	ID=gene1304;Name=FTN_1306;Dbxref=GeneID:4548433;gbkey=Gene;locus_tag=FTN_1306	285	230	0.307315	6.78024	0.206339		0.307315	1.2374	0.0925109
gi|118496615|ref|NC_008601.1|	RefSeq	gene	1376226	1376302	.	+	.	ID=gene1305;Name=FTN_1307;Dbxref=GeneID:4548434;gbkey=Gene;locus_tag=FTN_1307	283	173	-0.093189	4.94621	0.731284		-0.093189	0.937448	-0.0280527
gi|118496615|ref|NC_008601.1|	RefSeq	gene	1376398	1377921	.	-	.	ID=gene1306;Name=FTN_1308;Dbxref=GeneID:4548435;gbkey=Gene;locus_tag=FTN_1308	10166	5392	-0.298065	9.23841	0.147979		-0.298065	0.813342	-0.0897266
gi|118496615|ref|NC_008601.1|	RefSeq	gene	1378294	1380756	.	+	.	ID=gene1307;Name=pdpA;Dbxref=GeneID:4548436;gbkey=Gene;gene=pdpA;locus_tag=FTN_1309	6266	1726	-1.24328	8.16556	3.55155e-09		-1.24328	0.422413	-0.374263	FPI
gi|118496615|ref|NC_008601.1|	RefSeq	gene	1380761	1384042	.	+	.	ID=gene1308;Name=pdpB;Dbxref=GeneID:4548437;gbkey=Gene;gene=pdpB;locus_tag=FTN_1310	10739	4032	-0.796488	9.05788	0.000121319		-0.796488	0.575749	-0.239767	FPI
gi|118496615|ref|NC_008601.1|	RefSeq	gene	1384032	1384409	.	+	.	ID=gene1309;Name=FTN_1311;Dbxref=GeneID:4548438;gbkey=Gene;locus_tag=FTN_1311	866	334	-0.757555	5.47033	0.000795245		-0.757555	0.591498	-0.228047	FPI
gi|118496615|ref|NC_008601.1|	RefSeq	gene	1384422	1384916	.	+	.	ID=gene1310;Name=FTN_1312;Dbxref=GeneID:4548114;gbkey=Gene;locus_tag=FTN_1312	715	347	-0.426113	5.36607	0.0592103		-0.426113	0.744264	-0.128273	FPI
gi|118496615|ref|NC_008601.1|	RefSeq	gene	1384921	1386651	.	+	.	ID=gene1311;Name=FTN_1313;Dbxref=GeneID:4548115;gbkey=Gene;locus_tag=FTN_1313	909	363	-0.707369	5.77591	0.00162171		-0.707369	0.612436	-0.212939	FPI
gi|118496615|ref|NC_008601.1|	RefSeq	gene	1386652	1387173	.	+	.	ID=gene1312;Name=FTN_1314;Dbxref=GeneID:4548116;gbkey=Gene;locus_tag=FTN_1314	1386	425	-1.08843	6.0681	8.72211e-07		-1.08843	0.470274	-0.327649	FPI
gi|118496615|ref|NC_008601.1|	RefSeq	gene	1387186	1388616	.	+	.	ID=gene1313;Name=FTN_1315;Dbxref=GeneID:4548117;gbkey=Gene;locus_tag=FTN_1315	3527	873	-1.3975	7.32655	6.67024e-11		-1.3975	0.379587	-0.420689	FPI
gi|118496615|ref|NC_008601.1|	RefSeq	gene	1388629	1389252	.	+	.	ID=gene1314;Name=FTN_1316;Dbxref=GeneID:4548118;gbkey=Gene;locus_tag=FTN_1316	5523	1174	-1.61715	7.83167	3.53743e-14		-1.61715	0.325979	-0.48681	FPI
gi|118496615|ref|NC_008601.1|	RefSeq	gene	1389274	1390425	.	+	.	ID=gene1315;Name=FTN_1317;Dbxref=GeneID:4548119;gbkey=Gene;locus_tag=FTN_1317	8218	1866	-1.522	8.42775	6.17578e-13		-1.522	0.348203	-0.458167	FPI
gi|118496615|ref|NC_008601.1|	RefSeq	gene	1390391	1391164	.	+	.	ID=gene1316;Name=FTN_1318;Dbxref=GeneID:4548120;gbkey=Gene;locus_tag=FTN_1318	3309	757	-1.51112	7.12552	2.23024e-12		-1.51112	0.350839	-0.454892	FPI
gi|118496615|ref|NC_008601.1|	RefSeq	gene	1391204	1395181	.	+	.	ID=gene1317;Name=pdpC;Dbxref=GeneID:4548121;gbkey=Gene;gene=pdpC;locus_tag=FTN_1319	8331	2482	-1.13017	8.67512	6.57392e-08		-1.13017	0.456863	-0.340214	FPI
gi|118496615|ref|NC_008601.1|	RefSeq	gene	1395199	1395765	.	+	.	ID=gene1318;Name=FTN_1320;Dbxref=GeneID:4548122;gbkey=Gene;locus_tag=FTN_1320	942	401	-0.615212	5.7937	0.00591402		-0.615212	0.652834	-0.185197	FPI
gi|118496615|ref|NC_008601.1|	RefSeq	gene	1395772	1396968	.	-	.	ID=gene1319;Name=iglD;Dbxref=GeneID:4548123;gbkey=Gene;gene=iglD;locus_tag=FTN_1321	7468	2677	-0.863291	8.55373	3.38439e-05		-0.863291	0.549697	-0.259877	FPI
gi|118496615|ref|NC_008601.1|	RefSeq	gene	1396989	1397618	.	-	.	ID=gene1320;Name=iglC;Dbxref=GeneID:4548124;gbkey=Gene;gene=iglC;locus_tag=FTN_1322	26632	9845	-0.818902	10.3379	7.21229e-05		-0.818902	0.566873	-0.246514	FPI
gi|118496615|ref|NC_008601.1|	RefSeq	gene	1397635	1399155	.	-	.	ID=gene1321;Name=iglB;Dbxref=GeneID:4548125;gbkey=Gene;gene=iglB;locus_tag=FTN_1323	41787	14025	-0.958259	10.9345	3.50632e-06		-0.958259	0.514678	-0.288465	FPI
gi|118496615|ref|NC_008601.1|	RefSeq	gene	1399169	1399723	.	-	.	ID=gene1322;Name=iglA;Dbxref=GeneID:4548126;gbkey=Gene;gene=iglA;locus_tag=FTN_1324	9486	4112	-0.589158	8.93338	0.00438083		-0.589158	0.664731	-0.177354	FPI
gi|118496615|ref|NC_008601.1|	RefSeq	gene	1399803	1403540	.	-	.	ID=gene1323;Name=pdpD;Dbxref=GeneID:4548127;gbkey=Gene;gene=pdpD;locus_tag=FTN_1325	21625	5900	-1.25711	9.97719	1.60912e-09		-1.25711	0.418381	-0.378428	FPI
gi|118496615|ref|NC_008601.1|	RefSeq	gene	1403641	1404786	.	-	.	ID=gene1324;Name=anmK;Dbxref=GeneID:4548128;gbkey=Gene;gene=anmK;gene_synonym=ydhH;locus_tag=FTN_1326	3137	1606	-0.349105	7.62255	0.0958056		-0.349105	0.785071	-0.105091	FPI
gi|118496615|ref|NC_008601.1|	RefSeq	gene	1404933	1406114	.	+	.	ID=gene1325;Name=FTN_1327;Note=stop codon;Dbxref=GeneID:4548129;gbkey=Gene;locus_tag=FTN_1327;pseudo=true	299	257	0.398236	5.06616	0.102171		0.398236	1.3179	0.119881
gi|118496615|ref|NC_008601.1|	RefSeq	gene	1406119	1407573	.	+	.	ID=gene1326;Name=treA;Dbxref=GeneID:4548130;gbkey=Gene;gene=treA;locus_tag=FTN_1328	740	502	0.0569402	5.90629	0.804745		0.0569402	1.04026	0.0171407
gi|118496615|ref|NC_008601.1|	RefSeq	gene	1407740	1408804	.	-	.	ID=gene1327;Name=fbaA;Dbxref=GeneID:4548131;gbkey=Gene;gene=fbaA;locus_tag=FTN_1329	9924	6141	-0.0756574	9.37588	0.713627		-0.0756574	0.94891	-0.0227751
gi|118496615|ref|NC_008601.1|	RefSeq	gene	1408820	1410256	.	-	.	ID=gene1328;Name=pyk;Dbxref=GeneID:4548132;gbkey=Gene;gene=pyk;locus_tag=FTN_1330	39151	22515	-0.181372	11.1996	0.375741		-0.181372	0.881864	-0.0545985
gi|118496615|ref|NC_008601.1|	RefSeq	gene	1410272	1411450	.	-	.	ID=gene1329;Name=pgk;Dbxref=GeneID:4547281;gbkey=Gene;gene=pgk;locus_tag=FTN_1331	40107	16254	-0.686266	11.0248	0.000847748		-0.686266	0.62146	-0.206587
gi|118496615|ref|NC_008601.1|	RefSeq	gene	1411469	1412470	.	-	.	ID=gene1330;Name=gapA;Dbxref=GeneID:4547282;gbkey=Gene;gene=gapA;locus_tag=FTN_1332	48156	17622	-0.833545	11.2457	5.22993e-05		-0.833545	0.561149	-0.250922
gi|118496615|ref|NC_008601.1|	RefSeq	gene	1412508	1414499	.	-	.	ID=gene1331;Name=tktA;Dbxref=GeneID:4547283;gbkey=Gene;gene=tktA;locus_tag=FTN_1333	23524	8929	-0.780767	10.353	0.000153659		-0.780767	0.582057	-0.235034
gi|118496615|ref|NC_008601.1|	RefSeq	gene	1414639	1415142	.	+	.	ID=gene1332;Name=FTN_1334;Dbxref=GeneID:4547284;gbkey=Gene;locus_tag=FTN_1334	12581	4290	-0.935392	9.22419	6.56409e-06		-0.935392	0.5229	-0.281581
gi|118496615|ref|NC_008601.1|	RefSeq	gene	1415186	1415368	.	+	.	ID=gene1333;Name=rpmF;Dbxref=GeneID:4547285;gbkey=Gene;gene=rpmF;locus_tag=FTN_1335	10422	6079	-0.160934	9.49902	0.434433		-0.160934	0.894446	-0.048446
gi|118496615|ref|NC_008601.1|	RefSeq	gene	1415467	1416513	.	+	.	ID=gene1334;Name=plsX;Dbxref=GeneID:4547286;gbkey=Gene;gene=plsX;locus_tag=FTN_1336	16769	10055	-0.121093	10.729	0.555334		-0.121093	0.919491	-0.0364526
gi|118496615|ref|NC_008601.1|	RefSeq	gene	1416610	1417581	.	+	.	ID=gene1335;Name=fabH;Dbxref=GeneID:4547287;gbkey=Gene;gene=fabH;locus_tag=FTN_1337	15019	4625	-1.08246	9.82952	1.92929e-07		-1.08246	0.472224	-0.325852
gi|118496615|ref|NC_008601.1|	RefSeq	gene	1417629	1418549	.	+	.	ID=gene1336;Name=fabD;Dbxref=GeneID:4547288;gbkey=Gene;gene=fabD;locus_tag=FTN_1338	31673	16974	-0.283136	10.9276	0.167128		-0.283136	0.821803	-0.0852324
gi|118496615|ref|NC_008601.1|	RefSeq	gene	1418563	1419306	.	+	.	ID=gene1337;Name=fabG;Dbxref=GeneID:4547289;gbkey=Gene;gene=fabG;locus_tag=FTN_1339	22527	9100	-0.690921	10.305	0.000797654		-0.690921	0.619458	-0.207988
gi|118496615|ref|NC_008601.1|	RefSeq	gene	1419403	1419687	.	+	.	ID=gene1338;Name=acpP;Dbxref=GeneID:4547290;gbkey=Gene;gene=acpP;locus_tag=FTN_1340	26426	11349	-0.602599	10.6639	0.00338934		-0.602599	0.658566	-0.1814
gi|118496615|ref|NC_008601.1|	RefSeq	gene	1419767	1421026	.	+	.	ID=gene1339;Name=fabF;Dbxref=GeneID:4547291;gbkey=Gene;gene=fabF;locus_tag=FTN_1341	65798	34857	-0.299805	12.5313	0.143045		-0.299805	0.812362	-0.0902503
gi|118496615|ref|NC_008601.1|	RefSeq	gene	1421108	1421392	.	+	.	ID=gene1340;Name=FTN_1342;Dbxref=GeneID:4547292;gbkey=Gene;locus_tag=FTN_1342	992	710	0.134249	7.51774	0.540369		0.134249	1.09752	0.0404129
gi|118496615|ref|NC_008601.1|	RefSeq	gene	1421382	1422068	.	-	.	ID=gene1341;Name=FTN_1343;Dbxref=GeneID:4547293;gbkey=Gene;locus_tag=FTN_1343	526	266	-0.366727	6.74972	0.117644		-0.366727	0.77554	-0.110396
gi|118496615|ref|NC_008601.1|	RefSeq	gene	1422190	1423389	.	+	.	ID=gene1342;Name=FTN_1344;Dbxref=GeneID:4547294;gbkey=Gene;locus_tag=FTN_1344	1414	726	-0.344909	7.4711	0.109177		-0.344909	0.787357	-0.103828
gi|118496615|ref|NC_008601.1|	RefSeq	gene	1423503	1424555	.	+	.	ID=gene1343;Name=FTN_1345;Dbxref=GeneID:4547295;gbkey=Gene;locus_tag=FTN_1345	371	233	-0.0542771	6.53364	0.835856		-0.0542771	0.963077	-0.016339
gi|118496615|ref|NC_008601.1|	RefSeq	gene	1424642	1425430	.	+	.	ID=gene1344;Name=FTN_1346;Dbxref=GeneID:4547296;gbkey=Gene;locus_tag=FTN_1346	1663	964	-0.169877	7.38499	0.427295		-0.169877	0.888918	-0.0511381
gi|118496615|ref|NC_008601.1|	RefSeq	gene	1425430	1426710	.	+	.	ID=gene1345;Name=sun;Dbxref=GeneID:4547297;gbkey=Gene;gene=sun;locus_tag=FTN_1347	3329	2300	0.0833309	8.10294	0.690504		0.0833309	1.05946	0.0250851
gi|118496615|ref|NC_008601.1|	RefSeq	gene	1426688	1427179	.	-	.	ID=gene1346;Name=FTN_1348;Dbxref=GeneID:4547298;gbkey=Gene;locus_tag=FTN_1348	26889	27430	0.645525	11.052	0.00168291		0.645525	1.56431	0.194322
gi|118496615|ref|NC_008601.1|	RefSeq	gene	1427272	1427817	.	-	.	ID=gene1347;Name=FTN_1349;Dbxref=GeneID:4547299;gbkey=Gene;locus_tag=FTN_1349	452	409	0.472433	5.53274	0.0391396		0.472433	1.38745	0.142216
gi|118496615|ref|NC_008601.1|	RefSeq	gene	1427814	1429850	.	-	.	ID=gene1348;Name=ligA;Dbxref=GeneID:4547300;gbkey=Gene;gene=ligA;locus_tag=FTN_1350	2658	2169	0.323462	8.07274	0.121841		0.323462	1.25133	0.0973718
gi|118496615|ref|NC_008601.1|	RefSeq	gene	1430157	1430873	.	+	.	ID=gene1349;Name=FTN_1351;Dbxref=GeneID:4547908;gbkey=Gene;locus_tag=FTN_1351	1198	925	0.243659	7.70041	0.257355		0.243659	1.18399	0.0733485
gi|118496615|ref|NC_008601.1|	RefSeq	gene	1430875	1431672	.	+	.	ID=gene1350;Name=panB;Dbxref=GeneID:4547909;gbkey=Gene;gene=panB;locus_tag=FTN_1352	2040	2084	0.647537	7.85113	0.00205367		0.647537	1.56649	0.194928
gi|118496615|ref|NC_008601.1|	RefSeq	gene	1431659	1432444	.	+	.	ID=gene1351;Name=panC;Dbxref=GeneID:4547910;gbkey=Gene;gene=panC;locus_tag=FTN_1353	4156	4750	0.809499	8.60105	9.83129e-05		0.809499	1.7526	0.243683
gi|118496615|ref|NC_008601.1|	RefSeq	gene	1432438	1432773	.	+	.	ID=gene1352;Name=panD;Dbxref=GeneID:4547911;gbkey=Gene;gene=panD;locus_tag=FTN_1354	1932	2358	0.904206	7.58973	1.74189e-05		0.904206	1.87151	0.272193
gi|118496615|ref|NC_008601.1|	RefSeq	gene	1432777	1433547	.	+	.	ID=gene1353;Name=FTN_1355;Dbxref=GeneID:4547912;gbkey=Gene;locus_tag=FTN_1355	2830	3078	0.73795	8.23783	0.000408734		0.73795	1.6678	0.222145
gi|118496615|ref|NC_008601.1|	RefSeq	gene	1433559	1435358	.	-	.	ID=gene1354;Name=recD;Dbxref=GeneID:4547913;gbkey=Gene;gene=recD;locus_tag=FTN_1356	1405	772	-0.247079	7.69733	0.251744		-0.247079	0.842601	-0.0743781
gi|118496615|ref|NC_008601.1|	RefSeq	gene	1435324	1438974	.	-	.	ID=gene1355;Name=recB;Dbxref=GeneID:4547914;gbkey=Gene;gene=recB;locus_tag=FTN_1357	6054	3438	-0.199524	9.37581	0.335117		-0.199524	0.870838	-0.0600628
gi|118496615|ref|NC_008601.1|	RefSeq	gene	1439006	1439578	.	-	.	ID=gene1356;Name=FTN_1358;Dbxref=GeneID:4547915;gbkey=Gene;locus_tag=FTN_1358	597	335	-0.216721	6.30908	0.347786		-0.216721	0.860519	-0.0652395
gi|118496615|ref|NC_008601.1|	RefSeq	gene	1439520	1442759	.	-	.	ID=gene1357;Name=recC;Dbxref=GeneID:4547916;gbkey=Gene;gene=recC;locus_tag=FTN_1359	4907	1823	-0.811704	9.37521	0.000104947		-0.811704	0.569709	-0.244347
gi|118496615|ref|NC_008601.1|	RefSeq	gene	1442836	1444422	.	-	.	ID=gene1358;Name=gltB;Dbxref=GeneID:4547917;gbkey=Gene;gene=gltB;locus_tag=FTN_1360	2485	1108	-0.548458	9.53958	0.00952847		-0.548458	0.683751	-0.165102
gi|118496615|ref|NC_008601.1|	RefSeq	gene	1444600	1445469	.	+	.	ID=gene1359;Name=FTN_1361;Dbxref=GeneID:4547918;gbkey=Gene;locus_tag=FTN_1361	622	404	-0.00576832	7.39869	0.989731		-0.00576832	0.99601	-0.00173644
gi|118496615|ref|NC_008601.1|	RefSeq	gene	1445483	1445869	.	-	.	ID=gene1360;Name=FTN_1362;Dbxref=GeneID:4547919;gbkey=Gene;locus_tag=FTN_1362	1152	394	-0.930912	6.79836	2.82806e-05		-0.930912	0.524527	-0.280232
gi|118496615|ref|NC_008601.1|	RefSeq	gene	1446038	1446691	.	+	.	ID=gene1361;Name=FTN_1363;Dbxref=GeneID:4547920;gbkey=Gene;locus_tag=FTN_1363	1410	661	-0.476123	8.52699	0.0275813		-0.476123	0.718907	-0.143327
gi|118496615|ref|NC_008601.1|	RefSeq	gene	1446894	1446982	.	+	.	ID=gene1362;Name=FTN_1364;Dbxref=GeneID:4547921;gbkey=Gene;locus_tag=FTN_1364	215	141	0.00814235	7.92233	1		0.00814235	1.00566	0.00245109
gi|118496615|ref|NC_008601.1|	RefSeq	gene	1446988	1447061	.	+	.	ID=gene1363;Name=FTN_1365;Dbxref=GeneID:4547922;gbkey=Gene;locus_tag=FTN_1365	188	162	0.401768	8.11602	0.121995		0.401768	1.32113	0.120944
gi|118496615|ref|NC_008601.1|	RefSeq	gene	1447077	1447151	.	+	.	ID=gene1364;Name=FTN_1366;Dbxref=GeneID:4547923;gbkey=Gene;locus_tag=FTN_1366	213	154	0.148766	6.69724	0.594374		0.148766	1.10862	0.044783
gi|118496615|ref|NC_008601.1|	RefSeq	gene	1447265	1448899	.	-	.	ID=gene1365;Name=FTN_1367;Dbxref=GeneID:4548274;gbkey=Gene;locus_tag=FTN_1367	3891	1967	-0.367338	8.10657	0.0783387		-0.367338	0.775211	-0.11058
gi|118496615|ref|NC_008601.1|	RefSeq	gene	1448916	1449140	.	-	.	ID=gene1366;Name=feoA;Dbxref=GeneID:4548275;gbkey=Gene;gene=feoA;locus_tag=FTN_1368	931	384	-0.660749	5.73889	0.00310982		-0.660749	0.63255	-0.198905
gi|118496615|ref|NC_008601.1|	RefSeq	gene	1449249	1449956	.	+	.	ID=gene1367;Name=FTN_1369;Dbxref=GeneID:4548276;gbkey=Gene;locus_tag=FTN_1369	636	291	-0.511072	5.67507	0.0262213		-0.511072	0.701701	-0.153848
gi|118496615|ref|NC_008601.1|	RefSeq	gene	1450034	1450792	.	-	.	ID=gene1368;Name=gloB;Dbxref=GeneID:4548277;gbkey=Gene;gene=gloB;locus_tag=FTN_1370	1496	1109	0.184921	6.79786	0.386344		0.184921	1.13675	0.0556668
gi|118496615|ref|NC_008601.1|	RefSeq	gene	1450806	1451963	.	-	.	ID=gene1369;Name=FTN_1371;Dbxref=GeneID:4548278;gbkey=Gene;locus_tag=FTN_1371	4349	3000	0.0810656	8.16619	0.69693		0.0810656	1.0578	0.0244032
gi|118496615|ref|NC_008601.1|	RefSeq	gene	1451960	1453045	.	-	.	ID=gene1370;Name=FTN_1372;Dbxref=GeneID:4548279;gbkey=Gene;locus_tag=FTN_1372	2608	1325	-0.360138	7.35172	0.0873293		-0.360138	0.77909	-0.108412
gi|118496615|ref|NC_008601.1|	RefSeq	gene	1453011	1453760	.	-	.	ID=gene1371;Name=hemD;Dbxref=GeneID:4548280;gbkey=Gene;gene=hemD;locus_tag=FTN_1373	2519	1714	0.0613019	7.4571	0.771993		0.0613019	1.04341	0.0184537
gi|118496615|ref|NC_008601.1|	RefSeq	gene	1453761	1454180	.	-	.	ID=gene1372;Name=sufE;Dbxref=GeneID:4548281;gbkey=Gene;gene=sufE;locus_tag=FTN_1374	1344	992	0.17865	6.7364	0.405053		0.17865	1.13182	0.0537789
gi|118496615|ref|NC_008601.1|	RefSeq	gene	1454404	1454479	.	-	.	ID=gene1373;Name=FTN_1375;Dbxref=GeneID:4548282;gbkey=Gene;locus_tag=FTN_1375	55	26	-0.462629	4.6069	0.290669		-0.462629	0.725663	-0.139265
gi|118496615|ref|NC_008601.1|	RefSeq	gene	1454884	1455420	.	+	.	ID=gene1374;Name=FTN_1376;Dbxref=GeneID:4548283;gbkey=Gene;locus_tag=FTN_1376	228	147	-0.0164172	7.24238	0.975245		-0.0164172	0.988685	-0.00494206
gi|118496615|ref|NC_008601.1|	RefSeq	gene	1455684	1457381	.	+	.	ID=gene1375;Name=proS;Dbxref=GeneID:4548284;gbkey=Gene;gene=proS;locus_tag=FTN_1377	5078	4573	0.465658	10.325	0.0244281		0.465658	1.38095	0.140177
gi|118496615|ref|NC_008601.1|	RefSeq	gene	1457390	1457929	.	+	.	ID=gene1376;Name=FTN_1378;Dbxref=GeneID:4548285;gbkey=Gene;locus_tag=FTN_1378	428	438	0.649925	6.98672	0.00447571		0.649925	1.56909	0.195647
gi|118496615|ref|NC_008601.1|	RefSeq	gene	1457975	1459691	.	-	.	ID=gene1377;Name=FTN_1379;Note=frameshift;Dbxref=GeneID:4548286;gbkey=Gene;locus_tag=FTN_1379;pseudo=true	1411	489	-0.911886	7.3849	3.26588e-05		-0.911886	0.53149	-0.274505
gi|118496615|ref|NC_008601.1|	RefSeq	gene	1459763	1460896	.	+	.	ID=gene1378;Name=FTN_1380;Dbxref=GeneID:4548287;gbkey=Gene;locus_tag=FTN_1380	3763	2518	0.0371831	8.33372	0.859593		0.0371831	1.02611	0.0111932
gi|118496615|ref|NC_008601.1|	RefSeq	gene	1460964	1462382	.	+	.	ID=gene1379;Name=FTN_1381;Dbxref=GeneID:4548288;gbkey=Gene;locus_tag=FTN_1381	678	413	-0.0983312	7.3259	0.668756		-0.0983312	0.934113	-0.0296006
gi|118496615|ref|NC_008601.1|	RefSeq	gene	1462418	1462831	.	-	.	ID=gene1380;Name=FTN_1382;Dbxref=GeneID:4548289;gbkey=Gene;locus_tag=FTN_1382	1439	463	-1.01904	7.1363	3.65793e-06		-1.01904	0.493446	-0.306761
gi|118496615|ref|NC_008601.1|	RefSeq	gene	1463001	1463771	.	+	.	ID=gene1381;Name=FTN_1383;Dbxref=GeneID:4548290;gbkey=Gene;locus_tag=FTN_1383	1340	816	-0.0987908	7.45518	0.649329		-0.0987908	0.933815	-0.029739
gi|118496615|ref|NC_008601.1|	RefSeq	gene	1463755	1464180	.	-	.	ID=gene1382;Name=nusB;Dbxref=GeneID:4548291;gbkey=Gene;gene=nusB;locus_tag=FTN_1384	1283	700	-0.257272	6.8423	0.235201		-0.257272	0.836669	-0.0774465
gi|118496615|ref|NC_008601.1|	RefSeq	gene	1464367	1464768	.	+	.	ID=gene1383;Name=FTN_1385;Dbxref=GeneID:4547833;gbkey=Gene;locus_tag=FTN_1385	1374	592	-0.597842	6.73637	0.00593383		-0.597842	0.660742	-0.179968
gi|118496615|ref|NC_008601.1|	RefSeq	gene	1464785	1465297	.	+	.	ID=gene1384;Name=FTN_1386;Dbxref=GeneID:4547834;gbkey=Gene;locus_tag=FTN_1386	2603	950	-0.83732	7.45779	8.18671e-05		-0.83732	0.559682	-0.252059
gi|118496615|ref|NC_008601.1|	RefSeq	gene	1465519	1465965	.	+	.	ID=gene1385;Name=FTN_1387;Dbxref=GeneID:4547835;gbkey=Gene;locus_tag=FTN_1387	218	113	-0.330958	6.01261	0.222323		-0.330958	0.795009	-0.0996282
gi|118496615|ref|NC_008601.1|	RefSeq	gene	1466005	1466625	.	+	.	ID=gene1386;Name=FTN_1388;Dbxref=GeneID:4547836;gbkey=Gene;locus_tag=FTN_1388	621	445	0.13597	6.89656	0.546291		0.13597	1.09883	0.0409311
gi|118496615|ref|NC_008601.1|	RefSeq	gene	1466618	1467367	.	-	.	ID=gene1387;Name=FTN_1389;Dbxref=GeneID:4547837;gbkey=Gene;locus_tag=FTN_1389	1121	760	0.0560672	7.81306	0.799944		0.0560672	1.03963	0.0168779
gi|118496615|ref|NC_008601.1|	RefSeq	gene	1467369	1468055	.	-	.	ID=gene1388;Name=FTN_1390;Dbxref=GeneID:4547838;gbkey=Gene;locus_tag=FTN_1390	1990	705	-0.880191	8.16316	4.29349e-05		-0.880191	0.543295	-0.264964
gi|118496615|ref|NC_008601.1|	RefSeq	gene	1468100	1469791	.	-	.	ID=gene1389;Name=naoX;Dbxref=GeneID:4547839;gbkey=Gene;gene=naoX;locus_tag=FTN_1391	2542	1065	-0.638273	9.74496	0.00257935		-0.638273	0.642481	-0.192139
gi|118496615|ref|NC_008601.1|	RefSeq	gene	1469816	1470334	.	-	.	ID=gene1390;Name=FTN_1392;Dbxref=GeneID:4547840;gbkey=Gene;locus_tag=FTN_1392	1457	846	-0.167463	8.40676	0.43681		-0.167463	0.890407	-0.0504115
gi|118496615|ref|NC_008601.1|	RefSeq	gene	1470396	1470698	.	-	.	ID=gene1391;Name=FTN_1393;Dbxref=GeneID:4547841;gbkey=Gene;locus_tag=FTN_1393	362	247	0.0652842	6.53279	0.790378		0.0652842	1.04629	0.0196525
gi|118496615|ref|NC_008601.1|	RefSeq	gene	1471519	1471791	.	-	.	ID=gene1392;Name=FTN_1394;Dbxref=GeneID:4547842;gbkey=Gene;locus_tag=FTN_1394	222	120	-0.270533	4.20545	0.309142		-0.270533	0.829013	-0.0814385
gi|118496615|ref|NC_008601.1|	RefSeq	gene	1471772	1472776	.	-	.	ID=gene1393;Name=FTN_1395;Dbxref=GeneID:4547843;gbkey=Gene;locus_tag=FTN_1395	462	309	0.0364917	5.63444	0.881136		0.0364917	1.02562	0.0109851
gi|118496615|ref|NC_008601.1|	RefSeq	gene	1472780	1473271	.	-	.	ID=gene1394;Name=FTN_1396;Dbxref=GeneID:4547844;gbkey=Gene;locus_tag=FTN_1396	203	111	-0.253924	4.62907	0.363977		-0.253924	0.838613	-0.0764386
gi|118496615|ref|NC_008601.1|	RefSeq	gene	1473442	1477344	.	-	.	ID=gene1395;Name=FTN_1397;Dbxref=GeneID:4547845;gbkey=Gene;locus_tag=FTN_1397	11738	4089	-0.904561	9.33066	1.30527e-05		-0.904561	0.534195	-0.2723
gi|118496615|ref|NC_008601.1|	RefSeq	gene	1477432	1477947	.	-	.	ID=gene1396;Name=FTN_1398;Dbxref=GeneID:4547846;gbkey=Gene;locus_tag=FTN_1398	431	221	-0.346714	5.81887	0.149378		-0.346714	0.786373	-0.104371
gi|118496615|ref|NC_008601.1|	RefSeq	gene	1477952	1478668	.	-	.	ID=gene1397;Name=FTN_1399;Dbxref=GeneID:4547847;gbkey=Gene;locus_tag=FTN_1399	1216	587	-0.433858	6.79449	0.0461555		-0.433858	0.740279	-0.130604
gi|118496615|ref|NC_008601.1|	RefSeq	gene	1478678	1479367	.	-	.	ID=gene1398;Name=trmB;Dbxref=GeneID:4547848;gbkey=Gene;gene=trmB;locus_tag=FTN_1400	1668	1200	0.141692	7.31739	0.505909		0.141692	1.1032	0.0426537
gi|118496615|ref|NC_008601.1|	RefSeq	gene	1479437	1480072	.	+	.	ID=gene1399;Name=rhtB;Dbxref=GeneID:4547849;gbkey=Gene;gene=rhtB;locus_tag=FTN_1401	268	238	0.445302	5.50273	0.068572		0.445302	1.3616	0.134049
gi|118496615|ref|NC_008601.1|	RefSeq	gene	1480069	1480959	.	-	.	ID=gene1400;Name=ppnK;Dbxref=GeneID:4547850;gbkey=Gene;gene=ppnK;locus_tag=FTN_1402	813	895	0.755312	6.86215	0.000508577		0.755312	1.688	0.227372
gi|118496615|ref|NC_008601.1|	RefSeq	gene	1481150	1482094	.	+	.	ID=gene1401;Name=gtrB;Dbxref=GeneID:4547851;gbkey=Gene;gene=gtrB;locus_tag=FTN_1403	2810	1592	-0.202929	7.79801	0.333955		-0.202929	0.868785	-0.0610876
gi|118496615|ref|NC_008601.1|	RefSeq	gene	1482098	1482877	.	-	.	ID=gene1402;Name=FTN_1404;Dbxref=GeneID:4547852;gbkey=Gene;locus_tag=FTN_1404	923	1004	0.738052	7.46951	0.000633813		0.738052	1.66792	0.222176
gi|118496615|ref|NC_008601.1|	RefSeq	gene	1482886	1483809	.	-	.	ID=gene1403;Name=FTN_1405;Dbxref=GeneID:4547780;gbkey=Gene;locus_tag=FTN_1405	1608	1707	0.702933	7.997	0.000881974		0.702933	1.62781	0.211604
gi|118496615|ref|NC_008601.1|	RefSeq	gene	1483910	1484686	.	-	.	ID=gene1404;Name=FTN_1406;Dbxref=GeneID:4547781;gbkey=Gene;locus_tag=FTN_1406	518	284	-0.250192	6.36193	0.288532		-0.250192	0.840785	-0.0753152
gi|118496615|ref|NC_008601.1|	RefSeq	gene	1484686	1485012	.	-	.	ID=gene1405;Name=FTN_1407;Dbxref=GeneID:4547782;gbkey=Gene;locus_tag=FTN_1407	563	262	-0.486623	5.96062	0.0365468		-0.486623	0.713694	-0.146488
gi|118496615|ref|NC_008601.1|	RefSeq	gene	1485138	1485905	.	-	.	ID=gene1406;Name=FTN_1408;Dbxref=GeneID:4547783;gbkey=Gene;locus_tag=FTN_1408	1579	686	-0.585872	7.14731	0.00663957		-0.585872	0.666247	-0.176365
gi|118496615|ref|NC_008601.1|	RefSeq	gene	1485988	1487373	.	-	.	ID=gene1407;Name=FTN_1409;Dbxref=GeneID:4547784;gbkey=Gene;locus_tag=FTN_1409	430	409	0.544394	6.78374	0.0174696		0.544394	1.45841	0.163879
gi|118496615|ref|NC_008601.1|	RefSeq	gene	1487622	1488062	.	+	.	ID=gene1408;Name=bfr;Dbxref=GeneID:4547785;gbkey=Gene;gene=bfr;locus_tag=FTN_1410	2319	542	-1.48018	7.29839	1.34132e-11		-1.48018	0.358444	-0.445579
gi|118496615|ref|NC_008601.1|	RefSeq	gene	1488584	1488670	.	+	.	ID=gene1409;Name=FTN_1411;Dbxref=GeneID:4547786;gbkey=Gene;locus_tag=FTN_1411	320	374	0.841454	7.49172	0.000319097		0.841454	1.79186	0.253303
gi|118496615|ref|NC_008601.1|	RefSeq	gene	1488679	1489635	.	-	.	ID=gene1410;Name=FTN_1412;Dbxref=GeneID:4547787;gbkey=Gene;locus_tag=FTN_1412	13158	10528	0.295078	10.8993	0.150851		0.295078	1.22695	0.0888272
gi|118496615|ref|NC_008601.1|	RefSeq	gene	1489723	1490961	.	-	.	ID=gene1411;Name=FTN_1413;Dbxref=GeneID:4547788;gbkey=Gene;locus_tag=FTN_1413	2369	1516	-0.0272171	7.52538	0.899727		-0.0272171	0.981311	-0.00819317
gi|118496615|ref|NC_008601.1|	RefSeq	gene	1491205	1492131	.	-	.	ID=gene1412;Name=ppx;Dbxref=GeneID:4547789;gbkey=Gene;gene=ppx;locus_tag=FTN_1414	5505	4104	0.193073	8.61495	0.350572		0.193073	1.1432	0.0581207
gi|118496615|ref|NC_008601.1|	RefSeq	gene	1492329	1492652	.	+	.	ID=gene1413;Name=FTN_1415;Dbxref=GeneID:4547790;gbkey=Gene;locus_tag=FTN_1415	4591	2420	-0.307001	8.25658	0.139828		-0.307001	0.808321	-0.0924164
gi|118496615|ref|NC_008601.1|	RefSeq	gene	1492695	1493957	.	+	.	ID=gene1414;Name=rho;Dbxref=GeneID:4547791;gbkey=Gene;gene=rho;locus_tag=FTN_1416	3519	1811	-0.341573	8.82985	0.102263		-0.341573	0.78918	-0.102824
gi|118496615|ref|NC_008601.1|	RefSeq	gene	1494297	1495781	.	-	.	ID=gene1415;Name=manB;Dbxref=GeneID:4547792;gbkey=Gene;gene=manB;locus_tag=FTN_1417	2440	1467	-0.117215	7.97697	0.578938		-0.117215	0.921966	-0.0352853
gi|118496615|ref|NC_008601.1|	RefSeq	gene	1495811	1497217	.	-	.	ID=gene1416;Name=manC;Dbxref=GeneID:4547793;gbkey=Gene;gene=manC;locus_tag=FTN_1418	5429	3850	0.120958	8.73798	0.559162		0.120958	1.08746	0.0364121
gi|118496615|ref|NC_008601.1|	RefSeq	gene	1497548	1497892	.	-	.	ID=gene1417;Name=FTN_1419;Note=IS insertion;Dbxref=GeneID:4547794;gbkey=Gene;locus_tag=FTN_1419;pseudo=true	112	67	-0.124301	3.81481	0.698338		-0.124301	0.917449	-0.0374183
gi|118496615|ref|NC_008601.1|	RefSeq	gene	1498686	1499933	.	-	.	ID=gene1418;Name=wzx;Dbxref=GeneID:4547795;gbkey=Gene;gene=wzx;locus_tag=FTN_1420	2205	1220	-0.23709	7.48226	0.262426		-0.23709	0.848455	-0.0713713
gi|118496615|ref|NC_008601.1|	RefSeq	gene	1499938	1501830	.	-	.	ID=gene1419;Name=wbtH;Dbxref=GeneID:4547796;gbkey=Gene;gene=wbtH;locus_tag=FTN_1421	13556	7047	-0.327057	9.73716	0.111806		-0.327057	0.797161	-0.0984539
gi|118496615|ref|NC_008601.1|	RefSeq	gene	1501832	1502944	.	-	.	ID=gene1420;Name=wbtN;Dbxref=GeneID:4548348;gbkey=Gene;gene=wbtN;locus_tag=FTN_1422	12677	7676	-0.106996	9.61609	0.602886		-0.106996	0.92852	-0.032209
gi|118496615|ref|NC_008601.1|	RefSeq	gene	1502937	1504025	.	-	.	ID=gene1421;Name=wbtG;Dbxref=GeneID:4548349;gbkey=Gene;gene=wbtG;locus_tag=FTN_1423	5790	2943	-0.359476	8.44013	0.0829185		-0.359476	0.779448	-0.108213
gi|118496615|ref|NC_008601.1|	RefSeq	gene	1503991	1505283	.	-	.	ID=gene1422;Name=FTN_1424;Dbxref=GeneID:4548350;gbkey=Gene;locus_tag=FTN_1424	2904	1628	-0.218139	8.05007	0.298561		-0.218139	0.859674	-0.0656664
gi|118496615|ref|NC_008601.1|	RefSeq	gene	1505280	1506254	.	-	.	ID=gene1423;Name=wbtF;Dbxref=GeneID:4548351;gbkey=Gene;gene=wbtF;locus_tag=FTN_1425	25055	24068	0.558804	11.0382	0.00650212		0.558804	1.47305	0.168217
gi|118496615|ref|NC_008601.1|	RefSeq	gene	1506254	1507564	.	-	.	ID=gene1424;Name=wbtE;Dbxref=GeneID:4548352;gbkey=Gene;gene=wbtE;locus_tag=FTN_1426	24130	18522	0.2352	11.037	0.251109		0.2352	1.17707	0.0708023
gi|118496615|ref|NC_008601.1|	RefSeq	gene	1507568	1508659	.	-	.	ID=gene1425;Name=wbtD;Dbxref=GeneID:4548353;gbkey=Gene;gene=wbtD;locus_tag=FTN_1427	8491	3946	-0.488744	9.04688	0.0180584		-0.488744	0.712645	-0.147126
gi|118496615|ref|NC_008601.1|	RefSeq	gene	1508656	1509267	.	-	.	ID=gene1426;Name=wbtO;Dbxref=GeneID:4548354;gbkey=Gene;gene=wbtO;locus_tag=FTN_1428	5673	4372	0.240965	8.68295	0.243692		0.240965	1.18178	0.0725377
gi|118496615|ref|NC_008601.1|	RefSeq	gene	1509257	1509886	.	-	.	ID=gene1427;Name=wbtP;Dbxref=GeneID:4548355;gbkey=Gene;gene=wbtP;locus_tag=FTN_1429	5170	3831	0.184341	8.54984	0.3732		0.184341	1.1363	0.0554922
gi|118496615|ref|NC_008601.1|	RefSeq	gene	1509876	1510991	.	-	.	ID=gene1428;Name=wbtQ;Dbxref=GeneID:4548356;gbkey=Gene;gene=wbtQ;locus_tag=FTN_1430	12441	7633	-0.0879897	9.71777	0.668877		-0.0879897	0.940833	-0.0264875
gi|118496615|ref|NC_008601.1|	RefSeq	gene	1510997	1512733	.	-	.	ID=gene1429;Name=wbtA;Dbxref=GeneID:4548357;gbkey=Gene;gene=wbtA;locus_tag=FTN_1431	5864	3428	-0.157724	8.90116	0.446328		-0.157724	0.896438	-0.0474797
gi|118496615|ref|NC_008601.1|	RefSeq	gene	1513192	1517211	.	-	.	ID=gene1430;Name=hrpA;Dbxref=GeneID:4548358;gbkey=Gene;gene=hrpA;locus_tag=FTN_1432	8423	4717	-0.219671	9.16743	0.2869		-0.219671	0.858761	-0.0661275
gi|118496615|ref|NC_008601.1|	RefSeq	gene	1517235	1518122	.	-	.	ID=gene1431;Name=FTN_1433;Dbxref=GeneID:4548359;gbkey=Gene;locus_tag=FTN_1433	34628	25022	0.148047	11.1844	0.469629		0.148047	1.10807	0.0445666
gi|118496615|ref|NC_008601.1|	RefSeq	gene	1518136	1520352	.	-	.	ID=gene1432;Name=icd;Dbxref=GeneID:4548360;gbkey=Gene;gene=icd;locus_tag=FTN_1434	50094	35628	0.125163	11.697	0.540735		0.125163	1.09063	0.0376778
gi|118496615|ref|NC_008601.1|	RefSeq	gene	1520401	1520820	.	-	.	ID=gene1433;Name=FTN_1435;Dbxref=GeneID:4548361;gbkey=Gene;locus_tag=FTN_1435	1721	467	-1.26479	6.42937	8.61531e-09		-1.26479	0.416161	-0.380738
gi|118496615|ref|NC_008601.1|	RefSeq	gene	1520964	1522652	.	+	.	ID=gene1434;Name=fadD;Dbxref=GeneID:4548362;gbkey=Gene;gene=fadD;locus_tag=FTN_1436	14824	9012	-0.101225	9.87247	0.622266		-0.101225	0.932241	-0.0304717
gi|118496615|ref|NC_008601.1|	RefSeq	gene	1522690	1524930	.	+	.	ID=gene1435;Name=fadE;Dbxref=GeneID:4548363;gbkey=Gene;gene=fadE;locus_tag=FTN_1437	50678	27002	-0.291503	11.488	0.154575		-0.291503	0.817051	-0.0877511
gi|118496615|ref|NC_008601.1|	RefSeq	gene	1525003	1527699	.	+	.	ID=gene1436;Name=FTN_1438;Dbxref=GeneID:4548364;gbkey=Gene;locus_tag=FTN_1438	37377	18079	-0.431044	10.997	0.0355832		-0.431044	0.741725	-0.129757
gi|118496615|ref|NC_008601.1|	RefSeq	gene	1527712	1528899	.	+	.	ID=gene1437;Name=fadA;Dbxref=GeneID:4548365;gbkey=Gene;gene=fadA;locus_tag=FTN_1439	22200	10319	-0.488463	10.2306	0.0174629		-0.488463	0.712784	-0.147042
gi|118496615|ref|NC_008601.1|	RefSeq	gene	1528961	1529449	.	+	.	ID=gene1438;Name=FTN_1440;Dbxref=GeneID:4548366;gbkey=Gene;locus_tag=FTN_1440	1313	563	-0.604784	6.4822	0.00546589		-0.604784	0.65757	-0.182058
gi|118496615|ref|NC_008601.1|	RefSeq	gene	1529442	1530722	.	-	.	ID=gene1439;Name=FTN_1441;Dbxref=GeneID:4548367;gbkey=Gene;locus_tag=FTN_1441	1015	650	-0.0261746	7.02679	0.908582		-0.0261746	0.982021	-0.00787934
gi|118496615|ref|NC_008601.1|	RefSeq	gene	1530872	1531099	.	-	.	ID=gene1440;Name=FTN_1442;Dbxref=GeneID:4547924;gbkey=Gene;locus_tag=FTN_1442	449	125	-1.22735	5.06666	1.06712e-06		-1.22735	0.427103	-0.369468
gi|118496615|ref|NC_008601.1|	RefSeq	gene	1531184	1532599	.	-	.	ID=gene1441;Name=FTN_1443;Dbxref=GeneID:4547925;gbkey=Gene;locus_tag=FTN_1443	1998	1231	-0.0819299	7.73216	0.700995		-0.0819299	0.944793	-0.0246634
gi|118496615|ref|NC_008601.1|	RefSeq	gene	1532670	1533686	.	-	.	ID=gene1442;Name=FTN_1444;Dbxref=GeneID:4547926;gbkey=Gene;locus_tag=FTN_1444	14295	9538	0.0330373	10.136	0.872536		0.0330373	1.02316	0.00994521
gi|118496615|ref|NC_008601.1|	RefSeq	gene	1533934	1534848	.	-	.	ID=gene1443;Name=FTN_1445;Dbxref=GeneID:4547927;gbkey=Gene;locus_tag=FTN_1445	2284	1055	-0.497491	7.16707	0.0189076		-0.497491	0.708338	-0.14976
gi|118496615|ref|NC_008601.1|	RefSeq	gene	1534988	1536382	.	-	.	ID=gene1444;Name=FTN_1446;Dbxref=GeneID:4547928;gbkey=Gene;locus_tag=FTN_1446	4239	2722	-0.0222665	8.252	0.916163		-0.0222665	0.984685	-0.0067029
gi|118496615|ref|NC_008601.1|	RefSeq	gene	1536388	1537371	.	-	.	ID=gene1445;Name=FTN_1447;Dbxref=GeneID:4547929;gbkey=Gene;locus_tag=FTN_1447	10412	6267	-0.115609	9.37571	0.57454		-0.115609	0.922993	-0.0348018
gi|118496615|ref|NC_008601.1|	RefSeq	gene	1537382	1538812	.	-	.	ID=gene1446;Name=FTN_1448;Dbxref=GeneID:4547930;gbkey=Gene;locus_tag=FTN_1448	28030	18224	-0.00434251	10.8378	0.983336		-0.00434251	0.996995	-0.00130723
gi|118496615|ref|NC_008601.1|	RefSeq	gene	1538869	1539477	.	-	.	ID=gene1447;Name=FTN_1449;Dbxref=GeneID:4547931;gbkey=Gene;locus_tag=FTN_1449	1835	959	-0.319358	7.20703	0.133941		-0.319358	0.801426	-0.0961364
gi|118496615|ref|NC_008601.1|	RefSeq	gene	1539652	1540053	.	-	.	ID=gene1448;Name=FTN_1450;Dbxref=GeneID:4547932;gbkey=Gene;locus_tag=FTN_1450	1058	428	-0.688741	6.05628	0.0018677		-0.688741	0.620395	-0.207332
gi|118496615|ref|NC_008601.1|	RefSeq	gene	1540171	1540707	.	-	.	ID=gene1449;Name=FTN_1451;Dbxref=GeneID:4547933;gbkey=Gene;locus_tag=FTN_1451	26420	20606	0.258222	10.8311	0.207597		0.258222	1.196	0.0777326
gi|118496615|ref|NC_008601.1|	RefSeq	gene	1540850	1541539	.	+	.	ID=gene1450;Name=FTN_1452;Dbxref=GeneID:4547934;gbkey=Gene;locus_tag=FTN_1452	889	883	0.606935	12.2178	0.00508933		0.606935	1.52302	0.182706
gi|118496615|ref|NC_008601.1|	RefSeq	gene	1541523	1542560	.	+	.	ID=gene1450;Name=FTN_1452;Dbxref=GeneID:4547934;gbkey=Gene;locus_tag=FTN_1453	4051	3071	0.217212	9.85984	0.295549		0.217212	1.16249	0.0653875
gi|118496615|ref|NC_008601.1|	RefSeq	gene	1542637	1543890	.	+	.	ID=gene1452;Name=FTN_1454;Dbxref=GeneID:4547936;gbkey=Gene;locus_tag=FTN_1454	1372	725	-0.303401	6.79348	0.15989		-0.303401	0.81034	-0.0913327
gi|118496615|ref|NC_008601.1|	RefSeq	gene	1543884	1544660	.	+	.	ID=gene1453;Name=FTN_1455;Dbxref=GeneID:4547937;gbkey=Gene;locus_tag=FTN_1455	415	263	-0.0412437	5.33564	0.880937		-0.0412437	0.971817	-0.0124156
gi|118496615|ref|NC_008601.1|	RefSeq	gene	1544780	1545943	.	+	.	ID=gene1454;Name=cfa;Dbxref=GeneID:4547938;gbkey=Gene;gene=cfa;locus_tag=FTN_1456	2828	1254	-0.556419	8.29825	0.00829755		-0.556419	0.679988	-0.167499
gi|118496615|ref|NC_008601.1|	RefSeq	gene	1545936	1546454	.	+	.	ID=gene1455;Name=FTN_1457;Dbxref=GeneID:4547939;gbkey=Gene;locus_tag=FTN_1457	1786	833	-0.483505	7.22104	0.0237558		-0.483505	0.715238	-0.14555
gi|118496615|ref|NC_008601.1|	RefSeq	gene	1546487	1546993	.	+	.	ID=gene1456;Name=FTN_1458;Dbxref=GeneID:4547940;gbkey=Gene;locus_tag=FTN_1458	5255	1933	-0.826027	8.25001	7.79254e-05		-0.826027	0.56408	-0.248659
gi|118496615|ref|NC_008601.1|	RefSeq	gene	1546995	1547738	.	+	.	ID=gene1457;Name=FTN_1459;Dbxref=GeneID:4547941;gbkey=Gene;locus_tag=FTN_1459	3465	1802	-0.326451	7.97652	0.118444		-0.326451	0.797496	-0.0982715
gi|118496615|ref|NC_008601.1|	RefSeq	gene	1547752	1548582	.	+	.	ID=gene1458;Name=FTN_1460;Dbxref=GeneID:4547942;gbkey=Gene;locus_tag=FTN_1460	1097	583	-0.295161	7.13786	0.176448		-0.295161	0.814981	-0.0888523
gi|118496615|ref|NC_008601.1|	RefSeq	gene	1548606	1550903	.	-	.	ID=gene1459;Name=rnr;Dbxref=GeneID:4548556;gbkey=Gene;gene=rnr;locus_tag=FTN_1461	7911	3487	-0.565071	9.59495	0.00635041		-0.565071	0.675922	-0.170103
gi|118496615|ref|NC_008601.1|	RefSeq	gene	1550896	1551804	.	-	.	ID=gene1460;Name=truB;Dbxref=GeneID:4548557;gbkey=Gene;gene=truB;locus_tag=FTN_1462	9387	5777	-0.0835527	9.48255	0.685357		-0.0835527	0.943731	-0.0251519
gi|118496615|ref|NC_008601.1|	RefSeq	gene	1551791	1552483	.	-	.	ID=gene1461;Name=rnc;Dbxref=GeneID:4548558;gbkey=Gene;gene=rnc;locus_tag=FTN_1463	6682	4400	0.0140128	9.16144	0.94681		0.0140128	1.00976	0.00421827
gi|118496615|ref|NC_008601.1|	RefSeq	gene	1552490	1553353	.	-	.	ID=gene1462;Name=lepB;Dbxref=GeneID:4548559;gbkey=Gene;gene=lepB;locus_tag=FTN_1464	8327	4475	-0.279114	9.80738	0.176176		-0.279114	0.824097	-0.0840217
gi|118496615|ref|NC_008601.1|	RefSeq	gene	1553358	1554044	.	-	.	ID=gene1463;Name=FTN_1465;Dbxref=GeneID:4548560;gbkey=Gene;locus_tag=FTN_1465	49821	31269	-0.0552312	11.8449	0.787297		-0.0552312	0.96244	-0.0166262
gi|118496615|ref|NC_008601.1|	RefSeq	gene	1554485	1555576	.	-	.	ID=gene1464;Name=FTN_1466;Dbxref=GeneID:4548561;gbkey=Gene;locus_tag=FTN_1466	2164	1093	-0.368588	7.71059	0.0819682		-0.368588	0.77454	-0.110956
gi|118496615|ref|NC_008601.1|	RefSeq	gene	1555813	1556637	.	-	.	ID=gene1465;Name=proC;Dbxref=GeneID:4548562;gbkey=Gene;gene=proC;locus_tag=FTN_1467	919	431	-0.475495	6.24375	0.0323836		-0.475495	0.71922	-0.143138
gi|118496615|ref|NC_008601.1|	RefSeq	gene	1556744	1557322	.	+	.	ID=gene1466;Name=FTN_1468;Dbxref=GeneID:4548563;gbkey=Gene;locus_tag=FTN_1468	442	265	-0.121221	5.49223	0.624627		-0.121221	0.919409	-0.0364912
gi|118496615|ref|NC_008601.1|	RefSeq	gene	1557427	1558722	.	+	.	ID=gene1467;Name=kdtA;Dbxref=GeneID:4548564;gbkey=Gene;gene=kdtA;locus_tag=FTN_1469	5228	2668	-0.353699	8.46565	0.0884191		-0.353699	0.782575	-0.106474
gi|118496615|ref|NC_008601.1|	RefSeq	gene	1558719	1559600	.	+	.	ID=gene1468;Name=ispA;Dbxref=GeneID:4548565;gbkey=Gene;gene=ispA;locus_tag=FTN_1470	4459	3506	0.269887	8.35739	0.192898		0.269887	1.20571	0.0812441
gi|118496615|ref|NC_008601.1|	RefSeq	gene	1559648	1560412	.	+	.	ID=gene1469;Name=pcs;Dbxref=GeneID:4548566;gbkey=Gene;gene=pcs;locus_tag=FTN_1471	716	464	-0.00904331	6.2693	0.981956		-0.00904331	0.993751	-0.00272231
gi|118496615|ref|NC_008601.1|	RefSeq	gene	1560482	1561291	.	+	.	ID=gene1470;Name=FTN_1472;Dbxref=GeneID:4548567;gbkey=Gene;locus_tag=FTN_1472	721	371	-0.34171	6.6727	0.132593		-0.34171	0.789106	-0.102865
gi|118496615|ref|NC_008601.1|	RefSeq	gene	1561358	1561434	.	-	.	ID=gene1471;Name=FTN_1473;Dbxref=GeneID:4548568;gbkey=Gene;locus_tag=FTN_1473	63	60	0.54531	3.6529	0.117649		0.54531	1.45933	0.164155
gi|118496615|ref|NC_008601.1|	RefSeq	gene	1561671	1562807	.	-	.	ID=gene1472;Name=bglX;Dbxref=GeneID:4548569;gbkey=Gene;gene=bglX;locus_tag=FTN_1474	2573	908	-0.885826	8.33307	3.17704e-05		-0.885826	0.541178	-0.26666
gi|118496615|ref|NC_008601.1|	RefSeq	gene	1563109	1563483	.	-	.	ID=gene1473;Name=FTN_1475;Dbxref=GeneID:4548570;gbkey=Gene;locus_tag=FTN_1475	3983	2219	-0.227147	8.20665	0.275674		-0.227147	0.854323	-0.068378
gi|118496615|ref|NC_008601.1|	RefSeq	gene	1563574	1564161	.	-	.	ID=gene1474;Name=FTN_1476;Dbxref=GeneID:4548571;gbkey=Gene;locus_tag=FTN_1476	5448	3163	-0.167639	8.73958	0.418724		-0.167639	0.890299	-0.0504643
gi|118496615|ref|NC_008601.1|	RefSeq	gene	1564221	1565363	.	-	.	ID=gene1475;Name=lpxB;Dbxref=GeneID:4548572;gbkey=Gene;gene=lpxB;locus_tag=FTN_1477	7817	4660	-0.129493	9.71808	0.530502		-0.129493	0.914153	-0.0389812
gi|118496615|ref|NC_008601.1|	RefSeq	gene	1565363	1566142	.	-	.	ID=gene1476;Name=lpxA;Dbxref=GeneID:4548573;gbkey=Gene;gene=lpxA;locus_tag=FTN_1478	11000	6871	-0.0621211	10.2757	0.76306		-0.0621211	0.957855	-0.0187003
gi|118496615|ref|NC_008601.1|	RefSeq	gene	1566145	1566636	.	-	.	ID=gene1477;Name=fabZ;Dbxref=GeneID:4548574;gbkey=Gene;gene=fabZ;locus_tag=FTN_1479	11288	7088	-0.0545491	10.0635	0.791251		-0.0545491	0.962895	-0.0164209
gi|118496615|ref|NC_008601.1|	RefSeq	gene	1566651	1567664	.	-	.	ID=gene1478;Name=lpxD;Dbxref=GeneID:4548518;gbkey=Gene;gene=lpxD;locus_tag=FTN_1480	28258	18849	0.032618	11.0488	0.873651		0.032618	1.02287	0.009819
gi|118496615|ref|NC_008601.1|	RefSeq	gene	1567683	1568186	.	-	.	ID=gene1479;Name=ompH;Dbxref=GeneID:4548519;gbkey=Gene;gene=ompH;locus_tag=FTN_1481	5466	2349	-0.601629	8.72701	0.00384144		-0.601629	0.65901	-0.181108
gi|118496615|ref|NC_008601.1|	RefSeq	gene	1568322	1570700	.	-	.	ID=gene1480;Name=FTN_1482;Dbxref=GeneID:4548520;gbkey=Gene;locus_tag=FTN_1482	13408	8271	-0.0801699	9.9784	0.696664		-0.0801699	0.945946	-0.0241335
gi|118496615|ref|NC_008601.1|	RefSeq	gene	1570706	1571863	.	-	.	ID=gene1481;Name=dxr;Dbxref=GeneID:4548521;gbkey=Gene;gene=dxr;locus_tag=FTN_1483	4682	2250	-0.440394	8.48025	0.0343615		-0.440394	0.736933	-0.132572
gi|118496615|ref|NC_008601.1|	RefSeq	gene	1571869	1574475	.	-	.	ID=gene1482;Name=gyrA;Dbxref=GeneID:4548522;gbkey=Gene;gene=gyrA;locus_tag=FTN_1484	18903	12981	0.0745753	10.6804	0.716288		0.0745753	1.05305	0.0224494
gi|118496615|ref|NC_008601.1|	RefSeq	gene	1574733	1576400	.	+	.	ID=gene1483;Name=cbpA;Dbxref=GeneID:4548523;gbkey=Gene;gene=cbpA;locus_tag=FTN_1485	6334	1945	-1.08652	8.27951	2.20543e-07		-1.08652	0.470896	-0.327075
gi|118496615|ref|NC_008601.1|	RefSeq	gene	1576434	1577096	.	-	.	ID=gene1484;Name=ung;Dbxref=GeneID:4548524;gbkey=Gene;gene=ung;locus_tag=FTN_1486	956	574	-0.119151	6.06977	0.591531		-0.119151	0.92073	-0.0358679
gi|118496615|ref|NC_008601.1|	RefSeq	gene	1577093	1579960	.	-	.	ID=gene1485;Name=FTN_1487;Dbxref=GeneID:4548525;gbkey=Gene;locus_tag=FTN_1487	4228	2107	-0.38798	8.08421	0.0626274		-0.38798	0.764199	-0.116793
gi|118496615|ref|NC_008601.1|	RefSeq	gene	1579950	1580906	.	-	.	ID=gene1486;Name=FTN_1488;Dbxref=GeneID:4548526;gbkey=Gene;locus_tag=FTN_1488	1763	944	-0.284357	6.86352	0.18263		-0.284357	0.821107	-0.0856
gi|118496615|ref|NC_008601.1|	RefSeq	gene	1581018	1581764	.	-	.	ID=gene1487;Name=FTN_1489;Dbxref=GeneID:4548527;gbkey=Gene;locus_tag=FTN_1489	1748	812	-0.489314	6.68247	0.0222607		-0.489314	0.712364	-0.147298
gi|118496615|ref|NC_008601.1|	RefSeq	gene	1581776	1582627	.	-	.	ID=gene1488;Name=FTN_1490;Dbxref=GeneID:4548528;gbkey=Gene;locus_tag=FTN_1490	1531	584	-0.773543	6.47338	0.000367686		-0.773543	0.584979	-0.23286
gi|118496615|ref|NC_008601.1|	RefSeq	gene	1582627	1584609	.	-	.	ID=gene1489;Name=FTN_1491;Dbxref=GeneID:4548529;gbkey=Gene;locus_tag=FTN_1491	4432	2223	-0.378646	8.18488	0.0689525		-0.378646	0.769159	-0.113984
gi|118496615|ref|NC_008601.1|	RefSeq	gene	1584791	1586203	.	-	.	ID=gene1490;Name=lpdA;Dbxref=GeneID:4548530;gbkey=Gene;gene=lpdA;locus_tag=FTN_1492	9313	7439	0.292648	9.82269	0.155026		0.292648	1.22489	0.0880958
gi|118496615|ref|NC_008601.1|	RefSeq	gene	1586217	1588112	.	-	.	ID=gene1491;Name=aceF;Dbxref=GeneID:4548531;gbkey=Gene;gene=aceF;locus_tag=FTN_1493	57339	48653	0.379801	12.1138	0.0636463		0.379801	1.30116	0.114331
gi|118496615|ref|NC_008601.1|	RefSeq	gene	1588130	1590811	.	-	.	ID=gene1492;Name=aceE;Dbxref=GeneID:4548532;gbkey=Gene;gene=aceE;locus_tag=FTN_1494	49685	36413	0.168432	11.9228	0.410432		0.168432	1.12384	0.0507032
gi|118496615|ref|NC_008601.1|	RefSeq	gene	1591111	1592298	.	-	.	ID=gene1493;Name=FTN_1495;Dbxref=GeneID:4548533;gbkey=Gene;locus_tag=FTN_1495	2703	1208	-0.545114	7.3635	0.00978545		-0.545114	0.685337	-0.164096
gi|118496615|ref|NC_008601.1|	RefSeq	gene	1592378	1592992	.	+	.	ID=gene1494;Name=coaE;Dbxref=GeneID:4548534;gbkey=Gene;gene=coaE;locus_tag=FTN_1496	4436	4809	0.733248	8.88585	0.000411193		0.733248	1.66238	0.220729
gi|118496615|ref|NC_008601.1|	RefSeq	gene	1593024	1593100	.	-	.	ID=gene1495;Name=FTN_1497;Dbxref=GeneID:4548535;gbkey=Gene;locus_tag=FTN_1497	665	888	1.03383	7.59132	2.39268e-06		1.03383	2.04745	0.311213
gi|118496615|ref|NC_008601.1|	RefSeq	gene	1593115	1593189	.	-	.	ID=gene1496;Name=FTN_1498;Dbxref=GeneID:4547338;gbkey=Gene;locus_tag=FTN_1498	149	129	0.408487	7.71429	0.140911		0.408487	1.32729	0.122967
gi|118496615|ref|NC_008601.1|	RefSeq	gene	1593289	1594293	.	+	.	ID=gene1497;Name=trpS;Dbxref=GeneID:4547339;gbkey=Gene;gene=trpS;locus_tag=FTN_1499	3211	1374	-0.607815	9.69371	0.00384698		-0.607815	0.65619	-0.182971
gi|118496615|ref|NC_008601.1|	RefSeq	gene	1594295	1595020	.	+	.	ID=gene1498;Name=FTN_1500;Dbxref=GeneID:4547340;gbkey=Gene;locus_tag=FTN_1500	1323	644	-0.421835	8.49913	0.0513445		-0.421835	0.746475	-0.126985
gi|118496615|ref|NC_008601.1|	RefSeq	gene	1595030	1596328	.	+	.	ID=gene1499;Name=FTN_1501;Dbxref=GeneID:4547341;gbkey=Gene;locus_tag=FTN_1501	1138	547	-0.44003	8.28833	0.0445544		-0.44003	0.737119	-0.132462
gi|118496615|ref|NC_008601.1|	RefSeq	gene	1596727	1597764	.	-	.	ID=gene1500;Name=FTN_1502;Dbxref=GeneID:4547342;gbkey=Gene;locus_tag=FTN_1502	272	181	0.0291565	5.76916	0.936843		0.0291565	1.02042	0.008777
gi|118496615|ref|NC_008601.1|	RefSeq	gene	1598261	1598656	.	-	.	ID=gene1501;Name=FTN_1503;Dbxref=GeneID:4547343;gbkey=Gene;locus_tag=FTN_1503	605	205	-0.944188	5.79086	6.66905e-05		-0.944188	0.519722	-0.284229
gi|118496615|ref|NC_008601.1|	RefSeq	gene	1598658	1599542	.	-	.	ID=gene1502;Name=murQ;Dbxref=GeneID:4547344;gbkey=Gene;gene=murQ;gene_synonym=yfeU;locus_tag=FTN_1504	1479	683	-0.497814	7.11023	0.0212353		-0.497814	0.708179	-0.149857
gi|118496615|ref|NC_008601.1|	RefSeq	gene	1599539	1601503	.	-	.	ID=gene1503;Name=FTN_1505;Dbxref=GeneID:4547345;gbkey=Gene;locus_tag=FTN_1505	2355	1068	-0.523985	7.7712	0.0133728		-0.523985	0.695448	-0.157735
gi|118496615|ref|NC_008601.1|	RefSeq	gene	1601512	1602525	.	-	.	ID=gene1504;Name=FTN_1506;Dbxref=GeneID:4547346;gbkey=Gene;locus_tag=FTN_1506	1779	783	-0.567134	7.67497	0.00811602		-0.567134	0.674956	-0.170724
gi|118496615|ref|NC_008601.1|	RefSeq	gene	1602506	1603009	.	-	.	ID=gene1505;Name=FTN_1507;Dbxref=GeneID:4547347;gbkey=Gene;locus_tag=FTN_1507	1031	512	-0.392973	7.25289	0.0729247		-0.392973	0.761559	-0.118297
gi|118496615|ref|NC_008601.1|	RefSeq	gene	1603029	1603976	.	-	.	ID=gene1506;Name=accA;Dbxref=GeneID:4547348;gbkey=Gene;gene=accA;locus_tag=FTN_1508	7083	4069	-0.182893	9.21491	0.376073		-0.182893	0.880935	-0.0550561
gi|118496615|ref|NC_008601.1|	RefSeq	gene	1604143	1606677	.	+	.	ID=gene1507;Name=mutS;Dbxref=GeneID:4547349;gbkey=Gene;gene=mutS;locus_tag=FTN_1509	3272	2072	-0.0423572	8.05558	0.840998		-0.0423572	0.971067	-0.0127508
gi|118496615|ref|NC_008601.1|	RefSeq	gene	1606754	1607197	.	+	.	ID=gene1508;Name=secB2;Dbxref=GeneID:4547350;gbkey=Gene;gene=secB2;locus_tag=FTN_1510	10201	8117	0.287094	9.48614	0.162771		0.287094	1.22018	0.0864238
gi|118496615|ref|NC_008601.1|	RefSeq	gene	1607392	1608615	.	+	.	ID=gene1509;Name=FTN_1511;Dbxref=GeneID:4547351;gbkey=Gene;locus_tag=FTN_1511	3001	1194	-0.712804	8.15414	0.000733343		-0.712804	0.610133	-0.214576
gi|118496615|ref|NC_008601.1|	RefSeq	gene	1608678	1609850	.	+	.	ID=gene1510;Name=FTN_1512;Dbxref=GeneID:4547352;gbkey=Gene;locus_tag=FTN_1512	1129	757	0.040104	7.62723	0.857709		0.040104	1.02819	0.0120725
gi|118496615|ref|NC_008601.1|	RefSeq	gene	1609860	1610738	.	+	.	ID=gene1511;Name=xerC;Dbxref=GeneID:4547353;gbkey=Gene;gene=xerC;locus_tag=FTN_1513	1221	513	-0.634144	6.68408	0.00371822		-0.634144	0.644323	-0.190896
gi|118496615|ref|NC_008601.1|	RefSeq	gene	1610738	1611463	.	+	.	ID=gene1512;Name=FTN_1514;Dbxref=GeneID:4547354;gbkey=Gene;locus_tag=FTN_1514	528	247	-0.479074	5.93963	0.0398229		-0.479074	0.717438	-0.144216
gi|118496615|ref|NC_008601.1|	RefSeq	gene	1611470	1612084	.	-	.	ID=gene1513;Name=FTN_1515;Dbxref=GeneID:4547355;gbkey=Gene;locus_tag=FTN_1515	466	190	-0.67726	5.53141	0.00477734		-0.67726	0.625352	-0.203876
gi|118496615|ref|NC_008601.1|	RefSeq	gene	1612172	1612750	.	+	.	ID=gene1514;Name=FTN_1516;Dbxref=GeneID:4547356;gbkey=Gene;locus_tag=FTN_1516	1032	349	-0.947158	6.05858	2.38497e-05		-0.947158	0.518653	-0.285123
gi|118496615|ref|NC_008601.1|	RefSeq	gene	1612827	1613459	.	+	.	ID=gene1515;Name=FTN_1517;Dbxref=GeneID:4548170;gbkey=Gene;locus_tag=FTN_1517	443	316	0.129365	6.44378	0.57977		0.129365	1.09381	0.0389428
gi|118496615|ref|NC_008601.1|	RefSeq	gene	1614438	1616447	.	-	.	ID=gene1516;Name=relA;Dbxref=GeneID:4548171;gbkey=Gene;gene=relA;locus_tag=FTN_1518	6049	3908	-0.0134763	10.9792	0.949133		-0.0134763	0.990702	-0.00405677
gi|118496615|ref|NC_008601.1|	RefSeq	gene	1616750	1617106	.	-	.	ID=gene1517;Name=FTN_1519;Dbxref=GeneID:4548172;gbkey=Gene;locus_tag=FTN_1519	2011	766	-0.77563	7.29657	0.000293744		-0.77563	0.584134	-0.233488
gi|118496615|ref|NC_008601.1|	RefSeq	gene	1617140	1618336	.	-	.	ID=gene1518;Name=FTN_1520;Dbxref=GeneID:4548173;gbkey=Gene;locus_tag=FTN_1520	1172	360	-1.08591	7.42087	1.15403e-06		-1.08591	0.471097	-0.32689
gi|118496615|ref|NC_008601.1|	RefSeq	gene	1618541	1619425	.	+	.	ID=gene1519;Name=FTN_1521;Dbxref=GeneID:4548174;gbkey=Gene;locus_tag=FTN_1521	686	539	0.268812	7.04734	0.224414		0.268812	1.20482	0.0809205
gi|118496615|ref|NC_008601.1|	RefSeq	gene	1619415	1620341	.	-	.	ID=gene1520;Name=FTN_1522;Dbxref=GeneID:4548175;gbkey=Gene;locus_tag=FTN_1522	2254	2036	0.470013	8.68247	0.024979		0.470013	1.38512	0.141488
gi|118496615|ref|NC_008601.1|	RefSeq	gene	1620541	1621254	.	+	.	ID=gene1521;Name=FTN_1523;Dbxref=GeneID:4548176;gbkey=Gene;locus_tag=FTN_1523	520	315	-0.106338	6.00504	0.650569		-0.106338	0.928943	-0.032011
gi|118496615|ref|NC_008601.1|	RefSeq	gene	1621269	1621652	.	-	.	ID=gene1522;Name=FTN_1524;Dbxref=GeneID:4548177;gbkey=Gene;locus_tag=FTN_1524	829	435	-0.313503	6.06312	0.161997		-0.313503	0.804685	-0.0943739
gi|118496615|ref|NC_008601.1|	RefSeq	gene	1621649	1622248	.	-	.	ID=gene1523;Name=FTN_1525;Dbxref=GeneID:4548178;gbkey=Gene;locus_tag=FTN_1525	649	376	-0.170654	5.98571	0.450491		-0.170654	0.88844	-0.051372
gi|118496615|ref|NC_008601.1|	RefSeq	gene	1622245	1623663	.	-	.	ID=gene1524;Name=FTN_1526;Dbxref=GeneID:4548179;gbkey=Gene;locus_tag=FTN_1526	1844	1307	0.120201	7.62963	0.571588		0.120201	1.08689	0.036184
gi|118496615|ref|NC_008601.1|	RefSeq	gene	1623666	1624385	.	-	.	ID=gene1525;Name=FTN_1527;Dbxref=GeneID:4548180;gbkey=Gene;locus_tag=FTN_1527	352	280	0.286529	6.19031	0.232619		0.286529	1.2197	0.0862539
gi|118496615|ref|NC_008601.1|	RefSeq	gene	1624415	1624978	.	+	.	ID=gene1526;Name=FTN_1528;Dbxref=GeneID:4548181;gbkey=Gene;locus_tag=FTN_1528	492	275	-0.222363	6.42508	0.34181		-0.222363	0.85716	-0.066938
gi|118496615|ref|NC_008601.1|	RefSeq	gene	1625380	1626783	.	-	.	ID=gene1527;Name=FTN_1529;Dbxref=GeneID:4548182;gbkey=Gene;locus_tag=FTN_1529	2454	2041	0.350911	7.85568	0.0937848		0.350911	1.27537	0.105635
gi|118496615|ref|NC_008601.1|	RefSeq	gene	1626795	1627979	.	-	.	ID=gene1528;Name=lysA;Dbxref=GeneID:4548183;gbkey=Gene;gene=lysA;locus_tag=FTN_1530	827	470	-0.198398	6.60113	0.37806		-0.198398	0.871518	-0.0597238
gi|118496615|ref|NC_008601.1|	RefSeq	gene	1627992	1628675	.	-	.	ID=gene1529;Name=FTN_1531;Dbxref=GeneID:4548184;gbkey=Gene;locus_tag=FTN_1531	602	234	-0.74622	5.80087	0.00141672		-0.74622	0.596164	-0.224635
gi|118496615|ref|NC_008601.1|	RefSeq	gene	1629170	1630519	.	+	.	ID=gene1530;Name=gdhA;Dbxref=GeneID:4548185;gbkey=Gene;gene=gdhA;locus_tag=FTN_1532	41415	24351	-0.149382	11.4604	0.465589		-0.149382	0.901636	-0.0449685
gi|118496615|ref|NC_008601.1|	RefSeq	gene	1630614	1631804	.	+	.	ID=gene1531;Name=FTN_1533;Dbxref=GeneID:4548186;gbkey=Gene;locus_tag=FTN_1533	1968	1419	0.144923	7.65679	0.493512		0.144923	1.10567	0.0436263
gi|118496615|ref|NC_008601.1|	RefSeq	gene	1631854	1632324	.	+	.	ID=gene1532;Name=FTN_1534;Dbxref=GeneID:4548187;gbkey=Gene;locus_tag=FTN_1534	940	478	-0.358795	6.59961	0.104617		-0.358795	0.779816	-0.108008
gi|118496615|ref|NC_008601.1|	RefSeq	gene	1632461	1633285	.	+	.	ID=gene1533;Name=FTN_1535;Dbxref=GeneID:4548897;gbkey=Gene;locus_tag=FTN_1535	772	455	-0.145915	7.06129	0.516142		-0.145915	0.903806	-0.0439247
gi|118496615|ref|NC_008601.1|	RefSeq	gene	1633307	1634656	.	-	.	ID=gene1534;Name=FTN_1536;Dbxref=GeneID:4548898;gbkey=Gene;locus_tag=FTN_1536	985	666	0.0521801	7.70567	0.811443		0.0521801	1.03683	0.0157078
gi|118496615|ref|NC_008601.1|	RefSeq	gene	1635778	1636650	.	-	.	ID=gene1535;Name=FTN_1537;Dbxref=GeneID:4548899;gbkey=Gene;locus_tag=FTN_1537	1253	1087	0.411712	8.85055	0.0540876		0.411712	1.33026	0.123938
gi|118496615|ref|NC_008601.1|	RefSeq	gene	1636881	1638515	.	-	.	ID=gene1536;Name=groEL;Dbxref=GeneID:4548900;gbkey=Gene;gene=groEL;locus_tag=FTN_1538	78964	78322	0.605011	13.3147	0.00318799		0.605011	1.52099	0.182127
gi|118496615|ref|NC_008601.1|	RefSeq	gene	1638553	1638840	.	-	.	ID=gene1537;Name=groES;Dbxref=GeneID:4548901;gbkey=Gene;gene=groES;locus_tag=FTN_1539	18365	9203	-0.37999	10.4505	0.0643847		-0.37999	0.768443	-0.114388
gi|118496615|ref|NC_008601.1|	RefSeq	gene	1639091	1639525	.	+	.	ID=gene1538;Name=FTN_1540;Dbxref=GeneID:4548902;gbkey=Gene;locus_tag=FTN_1540	177	128	0.149063	8.36864	0.610518		0.149063	1.10885	0.0448724
gi|118496615|ref|NC_008601.1|	RefSeq	gene	1639536	1639611	.	-	.	ID=gene1539;Name=FTN_1541;Dbxref=GeneID:4548903;gbkey=Gene;locus_tag=FTN_1541	100	68	0.0603068	7.41757	0.908382		0.0603068	1.04269	0.0181542
gi|118496615|ref|NC_008601.1|	RefSeq	gene	1640166	1640930	.	+	.	ID=gene1540;Name=FTN_1542;Dbxref=GeneID:4548904;gbkey=Gene;locus_tag=FTN_1542	1141	570	-0.384417	6.49567	0.0775324		-0.384417	0.766089	-0.115721
gi|118496615|ref|NC_008601.1|	RefSeq	gene	1640934	1641401	.	+	.	ID=gene1541;Name=FTN_1543;Dbxref=GeneID:4548905;gbkey=Gene;locus_tag=FTN_1543	825	483	-0.155551	6.02109	0.487016		-0.155551	0.897789	-0.0468256
gi|118496615|ref|NC_008601.1|	RefSeq	gene	1641392	1642246	.	-	.	ID=gene1542;Name=hemK;Dbxref=GeneID:4548906;gbkey=Gene;gene=hemK;locus_tag=FTN_1544	1679	1052	-0.0576727	7.12867	0.789711		-0.0576727	0.960813	-0.0173612
gi|118496615|ref|NC_008601.1|	RefSeq	gene	1642239	1643324	.	-	.	ID=gene1543;Name=prfA;Dbxref=GeneID:4548907;gbkey=Gene;gene=prfA;locus_tag=FTN_1545	8275	5379	-0.00463168	9.44754	0.982917		-0.00463168	0.996795	-0.00139427
gi|118496615|ref|NC_008601.1|	RefSeq	gene	1643325	1644569	.	-	.	ID=gene1544;Name=hemA;Dbxref=GeneID:4548908;gbkey=Gene;gene=hemA;locus_tag=FTN_1546	9126	4049	-0.555616	9.21872	0.00720015		-0.555616	0.680366	-0.167257
gi|118496615|ref|NC_008601.1|	RefSeq	gene	1644749	1645387	.	+	.	ID=gene1545;Name=FTN_1547;Dbxref=GeneID:4548909;gbkey=Gene;locus_tag=FTN_1547	2008	721	-0.86081	6.93707	6.30062e-05		-0.86081	0.550643	-0.25913
gi|118496615|ref|NC_008601.1|	RefSeq	gene	1645390	1646760	.	+	.	ID=gene1546;Name=FTN_1548;Dbxref=GeneID:4548910;gbkey=Gene;locus_tag=FTN_1548	5182	2855	-0.243221	8.49672	0.241062		-0.243221	0.844857	-0.0732168
gi|118496615|ref|NC_008601.1|	RefSeq	gene	1646760	1647941	.	+	.	ID=gene1547;Name=FTN_1549;Dbxref=GeneID:4548911;gbkey=Gene;locus_tag=FTN_1549	1808	1009	-0.224659	7.52469	0.291814		-0.224659	0.855798	-0.067629
gi|118496615|ref|NC_008601.1|	RefSeq	gene	1648031	1649914	.	+	.	ID=gene1548;Name=parE;Dbxref=GeneID:4548912;gbkey=Gene;gene=parE;locus_tag=FTN_1550	2211	1368	-0.0758359	7.96042	0.721382		-0.0758359	0.948792	-0.0228289
gi|118496615|ref|NC_008601.1|	RefSeq	gene	1649963	1650487	.	-	.	ID=gene1549;Name=ampD;Dbxref=GeneID:4548913;gbkey=Gene;gene=ampD;locus_tag=FTN_1551	437	282	-0.0151433	5.95013	0.957534		-0.0151433	0.989558	-0.00455858
gi|118496615|ref|NC_008601.1|	RefSeq	gene	1650561	1651187	.	+	.	ID=gene1550;Name=FTN_1552;Dbxref=GeneID:4548914;gbkey=Gene;locus_tag=FTN_1552	422	250	-0.138473	6.39284	0.569006		-0.138473	0.90848	-0.0416846
gi|118496615|ref|NC_008601.1|	RefSeq	gene	1651197	1651661	.	-	.	ID=gene1551;Name=nudH;Dbxref=GeneID:4548439;gbkey=Gene;gene=nudH;locus_tag=FTN_1553	436	240	-0.244412	6.42341	0.304851		-0.244412	0.84416	-0.0735753
gi|118496615|ref|NC_008601.1|	RefSeq	gene	1651824	1653344	.	+	.	ID=gene1552;Name=FTN_1554;Dbxref=GeneID:4548440;gbkey=Gene;locus_tag=FTN_1554	474	290	-0.0920143	6.74428	0.697544		-0.0920143	0.938212	-0.0276991
gi|118496615|ref|NC_008601.1|	RefSeq	gene	1653462	1654346	.	+	.	ID=gene1553;Name=FTN_1555;Dbxref=GeneID:4548441;gbkey=Gene;locus_tag=FTN_1555	889	446	-0.378277	7.38555	0.0895539		-0.378277	0.769356	-0.113873
gi|118496615|ref|NC_008601.1|	RefSeq	gene	1654343	1654927	.	-	.	ID=gene1554;Name=FTN_1556;Dbxref=GeneID:4548442;gbkey=Gene;locus_tag=FTN_1556	9512	7256	0.226212	9.58152	0.271628		0.226212	1.16976	0.0680966
gi|118496615|ref|NC_008601.1|	RefSeq	gene	1654932	1655777	.	-	.	ID=gene1555;Name=FTN_1557;Dbxref=GeneID:4548443;gbkey=Gene;locus_tag=FTN_1557	24426	18935	0.249426	10.9761	0.223578		0.249426	1.18873	0.0750847
gi|118496615|ref|NC_008601.1|	RefSeq	gene	1655900	1656778	.	-	.	ID=gene1556;Name=xerD;Dbxref=GeneID:4548444;gbkey=Gene;gene=xerD;locus_tag=FTN_1558	1935	940	-0.424773	10.7159	0.0460634		-0.424773	0.744956	-0.127869
gi|118496615|ref|NC_008601.1|	RefSeq	gene	1656944	1657291	.	-	.	ID=gene1557;Name=rplS;Dbxref=GeneID:4548445;gbkey=Gene;gene=rplS;locus_tag=FTN_1559	4318	1766	-0.673058	11.1657	0.00129316		-0.673058	0.627176	-0.202611
gi|118496615|ref|NC_008601.1|	RefSeq	gene	1657291	1658049	.	-	.	ID=gene1558;Name=trmD;Dbxref=GeneID:4548446;gbkey=Gene;gene=trmD;locus_tag=FTN_1560	26424	8691	-0.987457	11.6719	1.83077e-06		-0.987457	0.504366	-0.297254
gi|118496615|ref|NC_008601.1|	RefSeq	gene	1658454	1658963	.	-	.	ID=gene1559;Name=rimM;Dbxref=GeneID:4548447;gbkey=Gene;gene=rimM;locus_tag=FTN_1561	2315	1459	-0.0492395	9.20348	0.817554		-0.0492395	0.966446	-0.0148226
gi|118496615|ref|NC_008601.1|	RefSeq	gene	1659007	1659255	.	-	.	ID=gene1560;Name=rpsP;Dbxref=GeneID:4548448;gbkey=Gene;gene=rpsP;locus_tag=FTN_1562	1502	817	-0.261658	7.98814	0.223323		-0.261658	0.834129	-0.078767
gi|118496615|ref|NC_008601.1|	RefSeq	gene	1659549	1660709	.	+	.	ID=gene1561;Name=metK;Dbxref=GeneID:4548449;gbkey=Gene;gene=metK;locus_tag=FTN_1563	1934	1003	-0.330448	8.43382	0.120238		-0.330448	0.79529	-0.0994746
gi|118496615|ref|NC_008601.1|	RefSeq	gene	1660920	1662086	.	-	.	ID=gene1562;Name=FTN_1564;Dbxref=GeneID:4548450;gbkey=Gene;locus_tag=FTN_1564	14295	14490	0.636331	10.7392	0.00199016		0.636331	1.55437	0.191555
gi|118496615|ref|NC_008601.1|	RefSeq	gene	1662200	1663210	.	-	.	ID=gene1563;Name=gcp;Dbxref=GeneID:4548451;gbkey=Gene;gene=gcp;locus_tag=FTN_1565	3089	1529	-0.397739	9.15193	0.0579843		-0.397739	0.759047	-0.119732
gi|118496615|ref|NC_008601.1|	RefSeq	gene	1663210	1663446	.	-	.	ID=gene1564;Name=FTN_1566;Dbxref=GeneID:4548452;gbkey=Gene;locus_tag=FTN_1566	897	201	-1.54066	7.01045	5.2662e-11		-1.54066	0.343729	-0.463784
gi|118496615|ref|NC_008601.1|	RefSeq	gene	1663549	1667802	.	-	.	ID=gene1565;Name=rpoC;Dbxref=GeneID:4548453;gbkey=Gene;gene=rpoC;locus_tag=FTN_1567	57858	43373	0.20107	13.0726	0.325731		0.20107	1.14955	0.0605281
gi|118496615|ref|NC_008601.1|	RefSeq	gene	1667864	1671940	.	-	.	ID=gene1566;Name=rpoB;Dbxref=GeneID:4548454;gbkey=Gene;gene=rpoB;locus_tag=FTN_1568	75607	49397	0.00269317	13.2643	0.989579		0.00269317	1.00187	0.000810724
gi|118496615|ref|NC_008601.1|	RefSeq	gene	1672094	1672471	.	-	.	ID=gene1567;Name=rplL;Dbxref=GeneID:4548455;gbkey=Gene;gene=rplL;locus_tag=FTN_1569	20637	6890	-0.965858	12.1271	3.09552e-06		-0.965858	0.511974	-0.290752
gi|118496615|ref|NC_008601.1|	RefSeq	gene	1672534	1673052	.	-	.	ID=gene1568;Name=rplJ;Dbxref=GeneID:4548456;gbkey=Gene;gene=rplJ;locus_tag=FTN_1570	57037	14767	-1.33273	12.9568	1.53294e-10		-1.33273	0.397017	-0.40119
gi|118496615|ref|NC_008601.1|	RefSeq	gene	1673222	1673917	.	-	.	ID=gene1569;Name=rplA;Dbxref=GeneID:4548457;gbkey=Gene;gene=rplA;locus_tag=FTN_1571	13865	8437	-0.0998549	11.8965	0.627126		-0.0998549	0.933127	-0.0300593
gi|118496615|ref|NC_008601.1|	RefSeq	gene	1673920	1674354	.	-	.	ID=gene1570;Name=rplK;Dbxref=GeneID:4548915;gbkey=Gene;gene=rplK;locus_tag=FTN_1572	9124	4586	-0.375633	11.2072	0.0686789		-0.375633	0.770767	-0.113077
gi|118496615|ref|NC_008601.1|	RefSeq	gene	1674423	1674956	.	-	.	ID=gene1571;Name=nusG;Dbxref=GeneID:4548916;gbkey=Gene;gene=nusG;locus_tag=FTN_1573	4938	2355	-0.451394	10.4117	0.0299898		-0.451394	0.731336	-0.135883
gi|118496615|ref|NC_008601.1|	RefSeq	gene	1674972	1675442	.	-	.	ID=gene1572;Name=secE;Dbxref=GeneID:4548917;gbkey=Gene;gene=secE;locus_tag=FTN_1574	1527	875	-0.186536	9.09353	0.385122		-0.186536	0.878713	-0.0561529
gi|118496615|ref|NC_008601.1|	RefSeq	gene	1675539	1675614	.	+	.	ID=gene1573;Name=FTN_1575;Dbxref=GeneID:4548918;gbkey=Gene;locus_tag=FTN_1575	1400	2011	1.13919	9.04969	8.19754e-08		1.13919	2.20257	0.342931
gi|118496615|ref|NC_008601.1|	RefSeq	gene	1675634	1676818	.	-	.	ID=gene1574;Name=tufA;Dbxref=GeneID:4548919;gbkey=Gene;gene=tufA;gene_synonym=tuf;locus_tag=FTN_1576	110321	190888	1.40781	14.4478	1.38199e-11		1.40781	2.65334	0.423792
gi|118496615|ref|NC_008601.1|	RefSeq	gene	1676863	1676938	.	+	.	ID=gene1575;Name=FTN_1577;Dbxref=GeneID:4548920;gbkey=Gene;locus_tag=FTN_1577	465	395	0.381302	9.24049	0.0941173		0.381302	1.30252	0.114783
gi|118496615|ref|NC_008601.1|	RefSeq	gene	1676967	1677040	.	+	.	ID=gene1576;Name=FTN_1578;Dbxref=GeneID:4548921;gbkey=Gene;locus_tag=FTN_1578	224	313	1.09893	9.53885	5.53745e-06		1.09893	2.14196	0.330812
gi|118496615|ref|NC_008601.1|	RefSeq	gene	1677042	1677126	.	+	.	ID=gene1577;Name=FTN_1579;Dbxref=GeneID:4548922;gbkey=Gene;locus_tag=FTN_1579	225	290	0.982438	9.26383	5.86934e-05		0.982438	1.9758	0.295743
gi|118496615|ref|NC_008601.1|	RefSeq	gene	1677283	1678698	.	-	.	ID=gene1578;Name=FTN_1580;Dbxref=GeneID:4548923;gbkey=Gene;locus_tag=FTN_1580	2041	1039	-0.357261	7.42422	0.0924349		-0.357261	0.780645	-0.107546
gi|118496615|ref|NC_008601.1|	RefSeq	gene	1678698	1679195	.	-	.	ID=gene1579;Name=FTN_1581;Dbxref=GeneID:4548924;gbkey=Gene;locus_tag=FTN_1581	820	469	-0.189209	6.32606	0.392885		-0.189209	0.877086	-0.0569576
gi|118496615|ref|NC_008601.1|	RefSeq	gene	1679173	1679886	.	-	.	ID=gene1580;Name=FTN_1582;Dbxref=GeneID:4548925;gbkey=Gene;locus_tag=FTN_1582	638	298	-0.481319	6.05752	0.0372724		-0.481319	0.716322	-0.144891
gi|118496615|ref|NC_008601.1|	RefSeq	gene	1679890	1680654	.	-	.	ID=gene1581;Name=glpF;Dbxref=GeneID:4548926;gbkey=Gene;gene=glpF;locus_tag=FTN_1583	2380	1528	-0.022526	7.88293	0.917423		-0.022526	0.984507	-0.00678101
gi|118496615|ref|NC_008601.1|	RefSeq	gene	1680664	1682196	.	-	.	ID=gene1582;Name=glpD;Dbxref=GeneID:4548927;gbkey=Gene;gene=glpD;locus_tag=FTN_1584	30858	20758	0.0448122	11.0203	0.826923		0.0448122	1.03155	0.0134898
gi|118496615|ref|NC_008601.1|	RefSeq	gene	1682445	1683947	.	-	.	ID=gene1583;Name=glpK;Dbxref=GeneID:4548928;gbkey=Gene;gene=glpK;locus_tag=FTN_1585	15657	11453	0.165706	10.1376	0.419446		0.165706	1.12171	0.0498824
gi|118496615|ref|NC_008601.1|	RefSeq	gene	1684004	1685317	.	-	.	ID=gene1584;Name=FTN_1586;Dbxref=GeneID:4548929;gbkey=Gene;locus_tag=FTN_1586	2834	1659	-0.155728	7.78239	0.458498		-0.155728	0.89768	-0.0468787
gi|118496615|ref|NC_008601.1|	RefSeq	gene	1685387	1685998	.	-	.	ID=gene1585;Name=FTN_1587;Dbxref=GeneID:4548877;gbkey=Gene;locus_tag=FTN_1587	3062	2640	0.402836	7.9685	0.0532345		0.402836	1.3221	0.121266
gi|118496615|ref|NC_008601.1|	RefSeq	gene	1686132	1687334	.	+	.	ID=gene1586;Name=FTN_1588;Dbxref=GeneID:4548878;gbkey=Gene;locus_tag=FTN_1588	459	262	-0.19207	6.40076	0.420521		-0.19207	0.875349	-0.0578188
gi|118496615|ref|NC_008601.1|	RefSeq	gene	1687338	1688312	.	-	.	ID=gene1587;Name=oppF;Dbxref=GeneID:4548879;gbkey=Gene;gene=oppF;locus_tag=FTN_1589	1183	644	-0.260491	6.62543	0.230142		-0.260491	0.834804	-0.0784157
gi|118496615|ref|NC_008601.1|	RefSeq	gene	1688313	1689281	.	-	.	ID=gene1588;Name=oppD;Dbxref=GeneID:4548880;gbkey=Gene;gene=oppD;locus_tag=FTN_1590	1761	834	-0.461439	6.96933	0.0309692		-0.461439	0.726261	-0.138907
gi|118496615|ref|NC_008601.1|	RefSeq	gene	1689285	1690145	.	-	.	ID=gene1589;Name=oppC;Dbxref=GeneID:4548881;gbkey=Gene;gene=oppC;locus_tag=FTN_1591	945	544	-0.179887	6.39521	0.412349		-0.179887	0.882772	-0.0541515
gi|118496615|ref|NC_008601.1|	RefSeq	gene	1690145	1691083	.	-	.	ID=gene1590;Name=oppB;Dbxref=GeneID:4548882;gbkey=Gene;gene=oppB;locus_tag=FTN_1592	1499	660	-0.566603	6.759	0.00870024		-0.566603	0.675205	-0.170564
gi|118496615|ref|NC_008601.1|	RefSeq	gene	1691108	1692784	.	-	.	ID=gene1591;Name=oppA;Dbxref=GeneID:4548883;gbkey=Gene;gene=oppA;locus_tag=FTN_1593	2619	1105	-0.628135	7.68484	0.00298458		-0.628135	0.647012	-0.189087
gi|118496615|ref|NC_008601.1|	RefSeq	gene	1692874	1695096	.	-	.	ID=gene1592;Name=uvrD;Dbxref=GeneID:4548884;gbkey=Gene;gene=uvrD;locus_tag=FTN_1594	2895	2647	0.487563	8.36008	0.0194092		0.487563	1.40207	0.146771
gi|118496615|ref|NC_008601.1|	RefSeq	gene	1695187	1696182	.	-	.	ID=gene1593;Name=ftsY;Dbxref=GeneID:4548885;gbkey=Gene;gene=ftsY;locus_tag=FTN_1595	2501	1324	-0.300792	7.77199	0.153579		-0.300792	0.811807	-0.0905475
gi|118496615|ref|NC_008601.1|	RefSeq	gene	1696215	1697531	.	-	.	ID=gene1594;Name=fimV;Dbxref=GeneID:4548886;gbkey=Gene;gene=fimV;locus_tag=FTN_1596	16987	10821	-0.0338074	10.217	0.86947		-0.0338074	0.976839	-0.010177
gi|118496615|ref|NC_008601.1|	RefSeq	gene	1697606	1699183	.	-	.	ID=gene1595;Name=prfC;Dbxref=GeneID:4548887;gbkey=Gene;gene=prfC;locus_tag=FTN_1597	4354	4002	0.495155	8.85076	0.016918		0.495155	1.40947	0.149056
gi|118496615|ref|NC_008601.1|	RefSeq	gene	1699245	1699874	.	-	.	ID=gene1596;Name=tmk;Dbxref=GeneID:4548888;gbkey=Gene;gene=tmk;locus_tag=FTN_1598	887	407	-0.507012	6.12785	0.0230793		-0.507012	0.703678	-0.152626
gi|118496615|ref|NC_008601.1|	RefSeq	gene	1699887	1701089	.	-	.	ID=gene1597;Name=nupC;Dbxref=GeneID:4548889;gbkey=Gene;gene=nupC;locus_tag=FTN_1599	2196	1116	-0.359723	7.32894	0.0893991		-0.359723	0.779314	-0.108288
gi|118496615|ref|NC_008601.1|	RefSeq	gene	1701108	1702307	.	-	.	ID=gene1598;Name=nupC1;Dbxref=GeneID:4548890;gbkey=Gene;gene=nupC1;locus_tag=FTN_1600	5396	2733	-0.364604	8.51549	0.0789267		-0.364604	0.776682	-0.109757
gi|118496615|ref|NC_008601.1|	RefSeq	gene	1702297	1703058	.	-	.	ID=gene1599;Name=deoC;Dbxref=GeneID:4548891;gbkey=Gene;gene=deoC;locus_tag=FTN_1601	3531	1700	-0.437731	8.13989	0.0364546		-0.437731	0.738295	-0.13177
gi|118496615|ref|NC_008601.1|	RefSeq	gene	1703021	1704265	.	-	.	ID=gene1600;Name=deoB;Dbxref=GeneID:4548892;gbkey=Gene;gene=deoB;locus_tag=FTN_1602	6368	4103	-0.0173712	9.35179	0.934028		-0.0173712	0.988031	-0.00522925
gi|118496615|ref|NC_008601.1|	RefSeq	gene	1704270	1705046	.	-	.	ID=gene1601;Name=FTN_1603;Dbxref=GeneID:4548893;gbkey=Gene;locus_tag=FTN_1603	2628	1208	-0.50452	8.03881	0.0168176		-0.50452	0.704895	-0.151876
gi|118496615|ref|NC_008601.1|	RefSeq	gene	1705066	1707759	.	-	.	ID=gene1602;Name=polA;Dbxref=GeneID:4548894;gbkey=Gene;gene=polA;locus_tag=FTN_1604	11548	6597	-0.190969	9.7701	0.353319		-0.190969	0.876017	-0.0574873
gi|118496615|ref|NC_008601.1|	RefSeq	gene	1707855	1708823	.	-	.	ID=gene1603;Name=lpxK;Dbxref=GeneID:4548895;gbkey=Gene;gene=lpxK;locus_tag=FTN_1605	4882	3235	0.0230823	8.67137	0.91251		0.0230823	1.01613	0.00694845
gi|118496615|ref|NC_008601.1|	RefSeq	gene	1708829	1710658	.	-	.	ID=gene1604;Name=msbA;Dbxref=GeneID:4548896;gbkey=Gene;gene=msbA;locus_tag=FTN_1606	7424	3466	-0.482124	9.24921	0.0198351		-0.482124	0.715923	-0.145134
gi|118496615|ref|NC_008601.1|	RefSeq	gene	1710763	1711872	.	+	.	ID=gene1605;Name=cca;Dbxref=GeneID:4547209;gbkey=Gene;gene=cca;locus_tag=FTN_1607	439	262	-0.127818	5.47319	0.59633		-0.127818	0.915214	-0.0384772
gi|118496615|ref|NC_008601.1|	RefSeq	gene	1711912	1712403	.	+	.	ID=gene1606;Name=dsbB;Dbxref=GeneID:4547210;gbkey=Gene;gene=dsbB;locus_tag=FTN_1608	945	386	-0.674786	6.15154	0.0024838		-0.674786	0.626425	-0.203131
gi|118496615|ref|NC_008601.1|	RefSeq	gene	1712416	1713789	.	+	.	ID=gene1607;Name=FTN_1609;Dbxref=GeneID:4547211;gbkey=Gene;locus_tag=FTN_1609	5268	2636	-0.382103	8.48672	0.0657212		-0.382103	0.767318	-0.115024
gi|118496615|ref|NC_008601.1|	RefSeq	gene	1713789	1716902	.	+	.	ID=gene1608;Name=FTN_1610;Dbxref=GeneID:4547212;gbkey=Gene;locus_tag=FTN_1610	5859	2361	-0.694444	8.55031	0.000852625		-0.694444	0.617948	-0.209048
gi|118496615|ref|NC_008601.1|	RefSeq	gene	1717771	1719051	.	+	.	ID=gene1609;Name=FTN_1611;Dbxref=GeneID:4547213;gbkey=Gene;locus_tag=FTN_1611	1486	982	0.0191484	7.43929	0.932591		0.0191484	1.01336	0.00576425
gi|118496615|ref|NC_008601.1|	RefSeq	gene	1719296	1719877	.	+	.	ID=gene1610;Name=FTN_1612;Dbxref=GeneID:4547214;gbkey=Gene;locus_tag=FTN_1612	189	198	0.683468	4.68509	0.00731647		0.683468	1.606	0.205744
gi|118496615|ref|NC_008601.1|	RefSeq	gene	1720107	1721120	.	-	.	ID=gene1611;Name=FTN_1613;Dbxref=GeneID:4547215;gbkey=Gene;locus_tag=FTN_1613	1828	561	-1.08727	6.65879	5.85912e-07		-1.08727	0.470651	-0.327301
gi|118496615|ref|NC_008601.1|	RefSeq	gene	1723371	1723925	.	-	.	ID=gene1612;Name=FTN_1614;Note=stop codon%2C IS insertion;Dbxref=GeneID:4547216;gbkey=Gene;locus_tag=FTN_1614;pseudo=true	576	257	-0.547336	5.73133	0.018456		-0.547336	0.684283	-0.164765
gi|118496615|ref|NC_008601.1|	RefSeq	gene	1724058	1725338	.	-	.	ID=gene1613;Name=FTN_1615;Dbxref=GeneID:4547217;gbkey=Gene;locus_tag=FTN_1615	3240	1608	-0.393916	7.78058	0.0601316		-0.393916	0.761061	-0.11858
gi|118496615|ref|NC_008601.1|	RefSeq	gene	1725342	1726298	.	-	.	ID=gene1614;Name=FTN_1616;Dbxref=GeneID:4547218;gbkey=Gene;locus_tag=FTN_1616	1542	666	-0.594347	6.87968	0.00593977		-0.594347	0.662344	-0.178916
gi|118496615|ref|NC_008601.1|	RefSeq	gene	1726414	1727841	.	+	.	ID=gene1615;Name=FTN_1617;Dbxref=GeneID:4547219;gbkey=Gene;locus_tag=FTN_1617	829	552	0.0300803	6.78572	0.899129		0.0300803	1.02107	0.00905507
gi|118496615|ref|NC_008601.1|	RefSeq	gene	1727838	1728719	.	-	.	ID=gene1616;Name=FTN_1618;Dbxref=GeneID:4547220;gbkey=Gene;locus_tag=FTN_1618	3198	1453	-0.521316	8.11604	0.0130447		-0.521316	0.696736	-0.156932
gi|118496615|ref|NC_008601.1|	RefSeq	gene	1728955	1730331	.	+	.	ID=gene1617;Name=appC;Dbxref=GeneID:4547221;gbkey=Gene;gene=appC;locus_tag=FTN_1619	3592	3304	0.496198	9.64036	0.0169694		0.496198	1.41049	0.149371
gi|118496615|ref|NC_008601.1|	RefSeq	gene	1730335	1731297	.	+	.	ID=gene1618;Name=appB;Dbxref=GeneID:4547222;gbkey=Gene;gene=appB;locus_tag=FTN_1620	5141	3714	0.14771	8.86515	0.475765		0.14771	1.10781	0.0444652
gi|118496615|ref|NC_008601.1|	RefSeq	gene	1731751	1732737	.	+	.	ID=gene1619;Name=FTN_1621;Dbxref=GeneID:4547223;gbkey=Gene;locus_tag=FTN_1621	1679	899	-0.284391	7.24805	0.18348		-0.284391	0.821088	-0.0856103
gi|118496615|ref|NC_008601.1|	RefSeq	gene	1732817	1733845	.	-	.	ID=gene1620;Name=pilT;Dbxref=GeneID:4548001;gbkey=Gene;gene=pilT;locus_tag=FTN_1622	1228	576	-0.475311	7.61428	0.0292375		-0.475311	0.719312	-0.143083
gi|118496615|ref|NC_008601.1|	RefSeq	gene	1733940	1736753	.	-	.	ID=gene1621;Name=acnA;Dbxref=GeneID:4548002;gbkey=Gene;gene=acnA;locus_tag=FTN_1623	103746	43737	-0.629339	12.6784	0.00216813		-0.629339	0.646473	-0.18945
gi|118496615|ref|NC_008601.1|	RefSeq	gene	1736858	1737736	.	-	.	ID=gene1622;Name=FTN_1624;Dbxref=GeneID:4548003;gbkey=Gene;locus_tag=FTN_1624	1609	595	-0.81831	7.21742	0.000163472		-0.81831	0.567106	-0.246336
gi|118496615|ref|NC_008601.1|	RefSeq	gene	1737806	1738183	.	+	.	ID=gene1623;Name=FTN_1625;Dbxref=GeneID:4548004;gbkey=Gene;locus_tag=FTN_1625	176	108	-0.0876768	5.15836	0.785028		-0.0876768	0.941037	-0.0263934
gi|118496615|ref|NC_008601.1|	RefSeq	gene	1738188	1739330	.	+	.	ID=gene1624;Name=hemN;Dbxref=GeneID:4548005;gbkey=Gene;gene=hemN;locus_tag=FTN_1626	838	428	-0.352478	8.24497	0.112966		-0.352478	0.783238	-0.106106
gi|118496615|ref|NC_008601.1|	RefSeq	gene	1739327	1739779	.	-	.	ID=gene1625;Name=FTN_1627;Dbxref=GeneID:4548006;gbkey=Gene;locus_tag=FTN_1627	679	361	-0.29455	7.94245	0.195089		-0.29455	0.815326	-0.0886685
gi|118496615|ref|NC_008601.1|	RefSeq	gene	1739838	1740791	.	-	.	ID=gene1626;Name=FTN_1628;Dbxref=GeneID:4548007;gbkey=Gene;locus_tag=FTN_1628	1018	491	-0.435078	8.70436	0.0491835		-0.435078	0.739654	-0.130971
gi|118496615|ref|NC_008601.1|	RefSeq	gene	1740867	1740952	.	+	.	ID=gene1627;Name=FTN_1629;Dbxref=GeneID:4548008;gbkey=Gene;locus_tag=FTN_1629	671	487	0.154366	7.08607	0.48689		0.154366	1.11293	0.0464687
gi|118496615|ref|NC_008601.1|	RefSeq	gene	1740961	1741314	.	-	.	ID=gene1628;Name=secG;Dbxref=GeneID:4548009;gbkey=Gene;gene=secG;locus_tag=FTN_1630	2784	1615	-0.168826	8.82183	0.421731		-0.168826	0.889566	-0.0508216
gi|118496615|ref|NC_008601.1|	RefSeq	gene	1741302	1742063	.	-	.	ID=gene1629;Name=tpiA;Dbxref=GeneID:4548010;gbkey=Gene;gene=tpiA;locus_tag=FTN_1631	4581	1800	-0.730845	8.18128	0.000476209		-0.730845	0.602551	-0.220006
gi|118496615|ref|NC_008601.1|	RefSeq	gene	1742066	1743397	.	-	.	ID=gene1630;Name=glmM;Dbxref=GeneID:4548011;gbkey=Gene;gene=glmM;locus_tag=FTN_1632	14295	5608	-0.733153	9.60372	0.000387266		-0.733153	0.601588	-0.220701
gi|118496615|ref|NC_008601.1|	RefSeq	gene	1743408	1743935	.	-	.	ID=gene1631;Name=apt;Dbxref=GeneID:4548012;gbkey=Gene;gene=apt;locus_tag=FTN_1633	13602	5918	-0.58384	9.51386	0.00463754		-0.58384	0.667186	-0.175753
gi|118496615|ref|NC_008601.1|	RefSeq	gene	1743975	1745444	.	-	.	ID=gene1632;Name=sucB;Dbxref=GeneID:4548013;gbkey=Gene;gene=sucB;locus_tag=FTN_1634	50215	26184	-0.322642	11.4959	0.115188		-0.322642	0.799604	-0.097125
gi|118496615|ref|NC_008601.1|	RefSeq	gene	1745470	1748283	.	-	.	ID=gene1633;Name=sucA;Dbxref=GeneID:4548014;gbkey=Gene;gene=sucA;locus_tag=FTN_1635	97465	44690	-0.508142	12.3701	0.0131751		-0.508142	0.703128	-0.152966
gi|118496615|ref|NC_008601.1|	RefSeq	gene	1748313	1749014	.	-	.	ID=gene1634;Name=sdhB;Dbxref=GeneID:4548015;gbkey=Gene;gene=sdhB;locus_tag=FTN_1636	31734	14075	-0.556102	10.8464	0.006792		-0.556102	0.680137	-0.167403
gi|118496615|ref|NC_008601.1|	RefSeq	gene	1749032	1750825	.	-	.	ID=gene1635;Name=sdhA;Dbxref=GeneID:4548016;gbkey=Gene;gene=sdhA;locus_tag=FTN_1637	51650	31627	-0.0908218	11.8379	0.657183		-0.0908218	0.938988	-0.0273401
gi|118496615|ref|NC_008601.1|	RefSeq	gene	1750838	1751206	.	-	.	ID=gene1636;Name=sdhD;Dbxref=GeneID:4548017;gbkey=Gene;gene=sdhD;locus_tag=FTN_1638	6262	2120	-0.945737	8.91178	6.07376e-06		-0.945737	0.519164	-0.284695
gi|118496615|ref|NC_008601.1|	RefSeq	gene	1751182	1751655	.	-	.	ID=gene1637;Name=sdhC;Dbxref=GeneID:4548018;gbkey=Gene;gene=sdhC;locus_tag=FTN_1639	8910	2204	-1.39847	9.16577	3.07593e-11		-1.39847	0.379331	-0.420982
gi|118496615|ref|NC_008601.1|	RefSeq	gene	1751913	1753172	.	+	.	ID=gene1638;Name=gltA;Dbxref=GeneID:4548019;gbkey=Gene;gene=gltA;locus_tag=FTN_1640	13854	5217	-0.792209	10.1566	0.000128148		-0.792209	0.577459	-0.238479
gi|118496615|ref|NC_008601.1|	RefSeq	gene	1753261	1754526	.	+	.	ID=gene1639;Name=ampG;Dbxref=GeneID:4548020;gbkey=Gene;gene=ampG;locus_tag=FTN_1641	1333	781	-0.154474	7.73997	0.475469		-0.154474	0.89846	-0.0465014
gi|118496615|ref|NC_008601.1|	RefSeq	gene	1754731	1755309	.	-	.	ID=gene1640;Name=sodB;Dbxref=GeneID:4548021;gbkey=Gene;gene=sodB;locus_tag=FTN_1642	5726	5179	0.471925	9.0935	0.0224126		0.471925	1.38696	0.142064
gi|118496615|ref|NC_008601.1|	RefSeq	gene	1755445	1755774	.	+	.	ID=gene1641;Name=FTN_1643;Dbxref=GeneID:4548022;gbkey=Gene;locus_tag=FTN_1643	1160	890	0.234514	6.87275	0.276597		0.234514	1.17651	0.0705957
gi|118496615|ref|NC_008601.1|	RefSeq	gene	1755791	1758634	.	-	.	ID=gene1642;Name=FTN_1644;Dbxref=GeneID:4548023;gbkey=Gene;locus_tag=FTN_1644	3589	2633	0.169908	8.73057	0.414523		0.169908	1.12499	0.0511475
gi|118496615|ref|NC_008601.1|	RefSeq	gene	1759707	1760144	.	-	.	ID=gene1643;Name=atpC;Dbxref=GeneID:4548024;gbkey=Gene;gene=atpC;locus_tag=FTN_1645	3896	1566	-0.698085	8.5985	0.000872389		-0.698085	0.61639	-0.210145
gi|118496615|ref|NC_008601.1|	RefSeq	gene	1760157	1761533	.	-	.	ID=gene1644;Name=atpD;Dbxref=GeneID:4548025;gbkey=Gene;gene=atpD;locus_tag=FTN_1646	26755	14191	-0.298041	11.1452	0.146104		-0.298041	0.813356	-0.0897192
gi|118496615|ref|NC_008601.1|	RefSeq	gene	1761543	1762439	.	-	.	ID=gene1645;Name=atpG;Dbxref=GeneID:4548026;gbkey=Gene;gene=atpG;locus_tag=FTN_1647	43894	20278	-0.497317	11.4475	0.0153503		-0.497317	0.708423	-0.149707
gi|118496615|ref|NC_008601.1|	RefSeq	gene	1762454	1763995	.	-	.	ID=gene1646;Name=atpA;Dbxref=GeneID:4548027;gbkey=Gene;gene=atpA;locus_tag=FTN_1648	81077	40193	-0.395558	12.4462	0.0534307		-0.395558	0.760195	-0.119075
gi|118496615|ref|NC_008601.1|	RefSeq	gene	1764014	1764538	.	-	.	ID=gene1647;Name=atpH;Dbxref=GeneID:4548028;gbkey=Gene;gene=atpH;locus_tag=FTN_1649	13826	4669	-0.949394	10.0809	4.72845e-06		-0.949394	0.51785	-0.285796
gi|118496615|ref|NC_008601.1|	RefSeq	gene	1764558	1765028	.	-	.	ID=gene1648;Name=atpF;Dbxref=GeneID:4548029;gbkey=Gene;gene=atpF;locus_tag=FTN_1650	12377	3679	-1.13347	10.079	5.39532e-08		-1.13347	0.455819	-0.341207
gi|118496615|ref|NC_008601.1|	RefSeq	gene	1765074	1765379	.	-	.	ID=gene1649;Name=atpE;Dbxref=GeneID:4548030;gbkey=Gene;gene=atpE;locus_tag=FTN_1651	12637	3201	-1.36424	9.78918	7.62098e-11		-1.36424	0.388438	-0.410678
gi|118496615|ref|NC_008601.1|	RefSeq	gene	1765430	1766221	.	-	.	ID=gene1650;Name=atpB;Dbxref=GeneID:4548031;gbkey=Gene;gene=atpB;locus_tag=FTN_1652	10653	3175	-1.12962	10.261	6.19305e-08		-1.12962	0.457037	-0.340049
gi|118496615|ref|NC_008601.1|	RefSeq	gene	1766274	1766705	.	-	.	ID=gene1651;Name=FTN_1653;Dbxref=GeneID:4548032;gbkey=Gene;locus_tag=FTN_1653	362	144	-0.712746	5.21376	0.00432063		-0.712746	0.610158	-0.214558
gi|118496615|ref|NC_008601.1|	RefSeq	gene	1766782	1768086	.	+	.	ID=gene1652;Name=FTN_1654;Dbxref=GeneID:4548033;gbkey=Gene;locus_tag=FTN_1654	908	446	-0.40878	7.16905	0.0666514		-0.40878	0.75326	-0.123055
gi|118496615|ref|NC_008601.1|	RefSeq	gene	1768088	1769017	.	-	.	ID=gene1653;Name=rluC;Dbxref=GeneID:4548034;gbkey=Gene;gene=rluC;locus_tag=FTN_1655	665	512	0.239529	6.48289	0.283091		0.239529	1.18061	0.0721054
gi|118496615|ref|NC_008601.1|	RefSeq	gene	1769010	1770077	.	-	.	ID=gene1654;Name=FTN_1656;Dbxref=GeneID:4548035;gbkey=Gene;locus_tag=FTN_1656	1912	1817	0.54323	7.55814	0.0098466		0.54323	1.45723	0.163528
gi|118496615|ref|NC_008601.1|	RefSeq	gene	1770080	1771378	.	-	.	ID=gene1655;Name=FTN_1657;Dbxref=GeneID:4548036;gbkey=Gene;locus_tag=FTN_1657	1514	1009	0.0313474	7.71037	0.886942		0.0313474	1.02197	0.00943652
gi|118496615|ref|NC_008601.1|	RefSeq	gene	1771385	1772650	.	-	.	ID=gene1656;Name=hisS;Dbxref=GeneID:4548037;gbkey=Gene;gene=hisS;locus_tag=FTN_1658	2128	2222	0.679112	8.62398	0.00121349		0.679112	1.60115	0.204433
gi|118496615|ref|NC_008601.1|	RefSeq	gene	1772658	1773089	.	-	.	ID=gene1657;Name=rbfA;Dbxref=GeneID:4548839;gbkey=Gene;gene=rbfA;locus_tag=FTN_1659	2147	3571	1.35073	8.41885	1.58062e-10		1.35073	2.55042	0.406611
gi|118496615|ref|NC_008601.1|	RefSeq	gene	1773092	1775632	.	-	.	ID=gene1658;Name=infB;Dbxref=GeneID:4548840;gbkey=Gene;gene=infB;locus_tag=FTN_1660	28954	44722	1.24401	11.9677	2.07572e-09		1.24401	2.36856	0.374483
gi|118496615|ref|NC_008601.1|	RefSeq	gene	1775671	1777140	.	-	.	ID=gene1659;Name=nusA;Dbxref=GeneID:4548841;gbkey=Gene;gene=nusA;locus_tag=FTN_1661	9153	8375	0.488627	10.3261	0.0176811		0.488627	1.40311	0.147091
gi|118496615|ref|NC_008601.1|	RefSeq	gene	1777158	1777610	.	-	.	ID=gene1660;Name=FTN_1662;Dbxref=GeneID:4548842;gbkey=Gene;locus_tag=FTN_1662	1331	1252	0.528463	7.74115	0.0130541		0.528463	1.44239	0.159083
gi|118496615|ref|NC_008601.1|	RefSeq	gene	1777686	1777762	.	+	.	ID=gene1661;Name=FTN_1663;Dbxref=GeneID:4548843;gbkey=Gene;locus_tag=FTN_1663	279	178	-0.031581	5.10936	0.937082		-0.031581	0.978348	-0.00950683
gi|118496615|ref|NC_008601.1|	RefSeq	gene	1777836	1778870	.	-	.	ID=gene1662;Name=hemE;Dbxref=GeneID:4548844;gbkey=Gene;gene=hemE;locus_tag=FTN_1664	5737	3377	-0.147761	8.55603	0.47573		-0.147761	0.90265	-0.0444804
gi|118496615|ref|NC_008601.1|	RefSeq	gene	1778924	1780432	.	-	.	ID=gene1663;Name=FTN_1665;Dbxref=GeneID:4548845;gbkey=Gene;locus_tag=FTN_1665	4231	2020	-0.449835	8.29356	0.0309978		-0.449835	0.732127	-0.135414
gi|118496615|ref|NC_008601.1|	RefSeq	gene	1780434	1780628	.	-	.	ID=gene1664;Name=FTN_1666;Dbxref=GeneID:4548846;gbkey=Gene;locus_tag=FTN_1666	673	291	-0.592633	5.6196	0.00967389		-0.592633	0.663132	-0.1784
gi|118496615|ref|NC_008601.1|	RefSeq	gene	1780704	1782155	.	-	.	ID=gene1665;Name=nuoN;Dbxref=GeneID:4548847;gbkey=Gene;gene=nuoN;locus_tag=FTN_1667	4749	2531	-0.291116	8.21441	0.161224		-0.291116	0.817269	-0.0876348
gi|118496615|ref|NC_008601.1|	RefSeq	gene	1782171	1783760	.	-	.	ID=gene1666;Name=nuoM;Dbxref=GeneID:4548848;gbkey=Gene;gene=nuoM;locus_tag=FTN_1668	6184	3902	-0.0475358	8.74017	0.819006		-0.0475358	0.967588	-0.0143097
gi|118496615|ref|NC_008601.1|	RefSeq	gene	1783786	1785795	.	-	.	ID=gene1667;Name=nuoL;Dbxref=GeneID:4548849;gbkey=Gene;gene=nuoL;locus_tag=FTN_1669	12885	10545	0.327653	9.94119	0.110755		0.327653	1.25497	0.0986333
gi|118496615|ref|NC_008601.1|	RefSeq	gene	1785805	1786122	.	-	.	ID=gene1668;Name=nuoK;Dbxref=GeneID:4548850;gbkey=Gene;gene=nuoK;locus_tag=FTN_1670	3908	3742	0.554151	8.30605	0.00760969		0.554151	1.4683	0.166816
gi|118496615|ref|NC_008601.1|	RefSeq	gene	1786115	1786720	.	-	.	ID=gene1669;Name=nuoJ;Dbxref=GeneID:4548851;gbkey=Gene;gene=nuoJ;locus_tag=FTN_1671	6472	5776	0.45264	8.99607	0.0283397		0.45264	1.36854	0.136258
gi|118496615|ref|NC_008601.1|	RefSeq	gene	1786725	1787213	.	-	.	ID=gene1670;Name=nuoI;Dbxref=GeneID:4548852;gbkey=Gene;gene=nuoI;locus_tag=FTN_1672	3259	2422	0.188551	7.9691	0.365927		0.188551	1.13962	0.0567595
gi|118496615|ref|NC_008601.1|	RefSeq	gene	1787227	1788237	.	-	.	ID=gene1671;Name=nuoH;Dbxref=GeneID:4548853;gbkey=Gene;gene=nuoH;locus_tag=FTN_1673	7420	5675	0.229986	9.25717	0.264609		0.229986	1.17282	0.0692328
gi|118496615|ref|NC_008601.1|	RefSeq	gene	1788239	1790605	.	-	.	ID=gene1672;Name=nuoG;Dbxref=GeneID:4548854;gbkey=Gene;gene=nuoG;locus_tag=FTN_1674	27494	21268	0.246356	11.2118	0.22919		0.246356	1.18621	0.0741605
gi|118496615|ref|NC_008601.1|	RefSeq	gene	1790623	1791897	.	-	.	ID=gene1673;Name=nuoF;Dbxref=GeneID:4548855;gbkey=Gene;gene=nuoF;locus_tag=FTN_1675	27106	28640	0.696206	11.2908	0.000709932		0.696206	1.62024	0.209579
gi|118496615|ref|NC_008601.1|	RefSeq	gene	1791904	1792392	.	-	.	ID=gene1674;Name=nuoE;Dbxref=GeneID:4548856;gbkey=Gene;gene=nuoE;locus_tag=FTN_1676	6288	6089	0.570382	9.27653	0.00577186		0.570382	1.48492	0.171702
gi|118496615|ref|NC_008601.1|	RefSeq	gene	1792402	1793655	.	-	.	ID=gene1675;Name=nuoD;Dbxref=GeneID:4548857;gbkey=Gene;gene=nuoD;locus_tag=FTN_1677	13447	13164	0.586098	10.4999	0.00439348		0.586098	1.50118	0.176433
gi|118496615|ref|NC_008601.1|	RefSeq	gene	1793677	1794321	.	-	.	ID=gene1676;Name=nuoC;Dbxref=GeneID:4548858;gbkey=Gene;gene=nuoC;locus_tag=FTN_1678	13679	13877	0.637517	10.3568	0.00195533		0.637517	1.55565	0.191912
gi|118496615|ref|NC_008601.1|	RefSeq	gene	1794324	1794800	.	-	.	ID=gene1677;Name=nuoB;Dbxref=GeneID:4548859;gbkey=Gene;gene=nuoB;locus_tag=FTN_1679	6753	5353	0.281603	9.39186	0.172269		0.281603	1.21554	0.0847709
gi|118496615|ref|NC_008601.1|	RefSeq	gene	1794791	1795189	.	-	.	ID=gene1678;Name=nuoA;Dbxref=GeneID:4548860;gbkey=Gene;gene=nuoA;locus_tag=FTN_1680	2624	1702	-0.00774668	7.90115	0.973155		-0.00774668	0.994645	-0.00233198
gi|118496615|ref|NC_008601.1|	RefSeq	gene	1795398	1795820	.	+	.	ID=gene1679;Name=fur;Dbxref=GeneID:4548861;gbkey=Gene;gene=fur;locus_tag=FTN_1681	1133	529	-0.481942	6.24356	0.0281392		-0.481942	0.716013	-0.145079
gi|118496615|ref|NC_008601.1|	RefSeq	gene	1796074	1797993	.	+	.	ID=gene1680;Name=frgA;Dbxref=GeneID:4548862;gbkey=Gene;gene=frgA;locus_tag=FTN_1682	706	656	0.510725	6.59502	0.0207358		0.510725	1.42477	0.153744
gi|118496615|ref|NC_008601.1|	RefSeq	gene	1798000	1799262	.	+	.	ID=gene1681;Name=FTN_1683;Dbxref=GeneID:4548863;gbkey=Gene;locus_tag=FTN_1683	376	284	0.211869	5.66594	0.373917		0.211869	1.15819	0.0637788
gi|118496615|ref|NC_008601.1|	RefSeq	gene	1799255	1800508	.	+	.	ID=gene1682;Name=FTN_1684;Dbxref=GeneID:4548864;gbkey=Gene;locus_tag=FTN_1684	426	309	0.153491	5.73275	0.523671		0.153491	1.11226	0.0462055
gi|118496615|ref|NC_008601.1|	RefSeq	gene	1800523	1801713	.	+	.	ID=gene1683;Name=FTN_1685;Dbxref=GeneID:4548865;gbkey=Gene;locus_tag=FTN_1685	477	346	0.153526	6.05686	0.513091		0.153526	1.11228	0.046216
gi|118496615|ref|NC_008601.1|	RefSeq	gene	1801799	1803328	.	+	.	ID=gene1684;Name=FTN_1686;Dbxref=GeneID:4548866;gbkey=Gene;locus_tag=FTN_1686	890	611	0.0741443	6.75211	0.739331		0.0741443	1.05274	0.0223197
gi|118496615|ref|NC_008601.1|	RefSeq	gene	1803376	1804869	.	+	.	ID=gene1685;Name=FTN_1687;Dbxref=GeneID:4548867;gbkey=Gene;locus_tag=FTN_1687	637	416	0.00207922	6.83618	1		0.00207922	1.00144	0.000625908
gi|118496615|ref|NC_008601.1|	RefSeq	gene	1804885	1805292	.	-	.	ID=gene1686;Name=FTN_1688;Dbxref=GeneID:4548868;gbkey=Gene;locus_tag=FTN_1688	2009	997	-0.393988	7.30614	0.0637804		-0.393988	0.761023	-0.118602
gi|118496615|ref|NC_008601.1|	RefSeq	gene	1805307	1806728	.	-	.	ID=gene1687;Name=gatB;Dbxref=GeneID:4548869;gbkey=Gene;gene=gatB;locus_tag=FTN_1689	8170	4605	-0.210341	9.35987	0.307987		-0.210341	0.864333	-0.063319
gi|118496615|ref|NC_008601.1|	RefSeq	gene	1806731	1808176	.	-	.	ID=gene1688;Name=gatA;Dbxref=GeneID:4548870;gbkey=Gene;gene=gatA;locus_tag=FTN_1690	11119	5994	-0.274642	9.81155	0.182179		-0.274642	0.826655	-0.0826756
gi|118496615|ref|NC_008601.1|	RefSeq	gene	1808185	1808466	.	-	.	ID=gene1689;Name=gatC;Dbxref=GeneID:4548871;gbkey=Gene;gene=gatC;locus_tag=FTN_1691	6423	3204	-0.386573	8.55335	0.0619469		-0.386573	0.764944	-0.11637
gi|118496615|ref|NC_008601.1|	RefSeq	gene	1808549	1809619	.	-	.	ID=gene1690;Name=FTN_1692;Dbxref=GeneID:4548872;gbkey=Gene;locus_tag=FTN_1692	6999	6548	0.520686	9.23371	0.0116404		0.520686	1.43464	0.156742
gi|118496615|ref|NC_008601.1|	RefSeq	gene	1809630	1811171	.	-	.	ID=gene1691;Name=FTN_1693;Dbxref=GeneID:4548873;gbkey=Gene;locus_tag=FTN_1693	1399	776	-0.23345	7.33653	0.278963		-0.23345	0.850598	-0.0702756
gi|118496615|ref|NC_008601.1|	RefSeq	gene	1811327	1812625	.	-	.	ID=gene1692;Name=purB;Dbxref=GeneID:4548874;gbkey=Gene;gene=purB;locus_tag=FTN_1694	7671	4265	-0.230074	9.19347	0.26513		-0.230074	0.852591	-0.0692593
gi|118496615|ref|NC_008601.1|	RefSeq	gene	1812953	1813588	.	+	.	ID=gene1693;Name=FTN_1695;Dbxref=GeneID:4548875;gbkey=Gene;locus_tag=FTN_1695	2728	1088	-0.709325	7.32328	0.000803713		-0.709325	0.611606	-0.213528
gi|118496615|ref|NC_008601.1|	RefSeq	gene	1813595	1814377	.	+	.	ID=gene1694;Name=FTN_1696;Dbxref=GeneID:4548876;gbkey=Gene;locus_tag=FTN_1696	790	447	-0.204746	6.28072	0.356876		-0.204746	0.867691	-0.0616347
gi|118496615|ref|NC_008601.1|	RefSeq	gene	1814403	1815263	.	-	.	ID=gene1695;Name=FTN_1697;Dbxref=GeneID:4548575;gbkey=Gene;locus_tag=FTN_1697	2829	1748	-0.0777932	8.17506	0.712081		-0.0777932	0.947506	-0.0234181
gi|118496615|ref|NC_008601.1|	RefSeq	gene	1815849	1816619	.	-	.	ID=gene1696;Name=FTN_1698;Dbxref=GeneID:4548576;gbkey=Gene;locus_tag=FTN_1698	4789	2372	-0.396816	8.36394	0.0563779		-0.396816	0.759532	-0.119454
gi|118496615|ref|NC_008601.1|	RefSeq	gene	1816647	1820534	.	-	.	ID=gene1697;Name=purL;Dbxref=GeneID:4548577;gbkey=Gene;gene=purL;locus_tag=FTN_1699	10318	6318	-0.0908326	10.0829	0.659286		-0.0908326	0.938981	-0.0273433
gi|118496615|ref|NC_008601.1|	RefSeq	gene	1820534	1822024	.	-	.	ID=gene1698;Name=purF;Dbxref=GeneID:4548578;gbkey=Gene;gene=purF;locus_tag=FTN_1700	6348	3470	-0.25457	9.05343	0.218582		-0.25457	0.838237	-0.0766333
gi|118496615|ref|NC_008601.1|	RefSeq	gene	1822118	1823464	.	-	.	ID=gene1699;Name=FTN_1701;Dbxref=GeneID:4548579;gbkey=Gene;locus_tag=FTN_1701	5775	3857	0.0344469	8.85331	0.86863		0.0344469	1.02416	0.0103695
gi|118496615|ref|NC_008601.1|	RefSeq	gene	1823475	1824116	.	-	.	ID=gene1700;Name=FTN_1702;Dbxref=GeneID:4548580;gbkey=Gene;locus_tag=FTN_1702	974	347	-0.87201	6.62727	0.000106105		-0.87201	0.546385	-0.262501
gi|118496615|ref|NC_008601.1|	RefSeq	gene	1824125	1825654	.	-	.	ID=gene1701;Name=tolC;Dbxref=GeneID:4548581;gbkey=Gene;gene=tolC;locus_tag=FTN_1703	10834	7321	0.0513355	9.85648	0.803282		0.0513355	1.03622	0.0154535
gi|118496615|ref|NC_008601.1|	RefSeq	gene	1825663	1826283	.	-	.	ID=gene1702;Name=pcm;Dbxref=GeneID:4548582;gbkey=Gene;gene=pcm;locus_tag=FTN_1704	2501	885	-0.881893	8.0251	3.49651e-05		-0.881893	0.542655	-0.265476
gi|118496615|ref|NC_008601.1|	RefSeq	gene	1826603	1827934	.	+	.	ID=gene1703;Name=FTN_1705;Dbxref=GeneID:4548583;gbkey=Gene;locus_tag=FTN_1705	7527	3800	-0.369278	9.21997	0.074002		-0.369278	0.77417	-0.111164
gi|118496615|ref|NC_008601.1|	RefSeq	gene	1827976	1829157	.	-	.	ID=gene1704;Name=FTN_1706;Dbxref=GeneID:4548584;gbkey=Gene;locus_tag=FTN_1706	2484	2254	0.476587	8.62273	0.0227233		0.476587	1.39145	0.143467
gi|118496615|ref|NC_008601.1|	RefSeq	gene	1829332	1830759	.	+	.	ID=gene1705;Name=nhaD;Dbxref=GeneID:4548585;gbkey=Gene;gene=nhaD;locus_tag=FTN_1707	819	528	-0.0165329	7.21343	0.952122		-0.0165329	0.988606	-0.0049769
gi|118496615|ref|NC_008601.1|	RefSeq	gene	1830749	1832410	.	-	.	ID=gene1706;Name=FTN_1708;Dbxref=GeneID:4548586;gbkey=Gene;locus_tag=FTN_1708	1218	847	0.0926981	7.65479	0.669981		0.0926981	1.06636	0.0279049
gi|118496615|ref|NC_008601.1|	RefSeq	gene	1832411	1834285	.	-	.	ID=gene1707;Name=FTN_1709;Dbxref=GeneID:4548587;gbkey=Gene;locus_tag=FTN_1709	2342	1222	-0.321684	8.46358	0.127815		-0.321684	0.800135	-0.0968365
gi|118496615|ref|NC_008601.1|	RefSeq	gene	1834292	1835296	.	-	.	ID=gene1708;Name=obgE;Dbxref=GeneID:4548588;gbkey=Gene;gene=obgE;gene_synonym=cgtA,obg,yhbZ;locus_tag=FTN_1710	10172	10374	0.645151	9.97126	0.00174881		0.645151	1.5639	0.19421
gi|118496615|ref|NC_008601.1|	RefSeq	gene	1835369	1836565	.	-	.	ID=gene1709;Name=tyrP;Dbxref=GeneID:4548589;gbkey=Gene;gene=tyrP;locus_tag=FTN_1711	1076	449	-0.643987	7.27588	0.00350673		-0.643987	0.639942	-0.193859
gi|118496615|ref|NC_008601.1|	RefSeq	gene	1836693	1837148	.	+	.	ID=gene1710;Name=FTN_1712;Dbxref=GeneID:4548590;gbkey=Gene;locus_tag=FTN_1712	315	230	0.162998	6.61252	0.515444		0.162998	1.11961	0.0490672
gi|118496615|ref|NC_008601.1|	RefSeq	gene	1837161	1837808	.	-	.	ID=gene1711;Name=FTN_1713;Dbxref=GeneID:4548591;gbkey=Gene;locus_tag=FTN_1713	1536	1106	0.142949	7.78262	0.503589		0.142949	1.10416	0.043032
gi|118496615|ref|NC_008601.1|	RefSeq	gene	1837873	1838559	.	-	.	ID=gene1712;Name=kdpE;Dbxref=GeneID:4548592;gbkey=Gene;gene=kdpE;locus_tag=FTN_1714	2761	1393	-0.370183	7.84822	0.0784181		-0.370183	0.773684	-0.111436
gi|118496615|ref|NC_008601.1|	RefSeq	gene	1838601	1841282	.	-	.	ID=gene1713;Name=kdpD;Dbxref=GeneID:4548593;gbkey=Gene;gene=kdpD;locus_tag=FTN_1715	10946	5175	-0.463976	10.2056	0.0244532		-0.463976	0.724986	-0.139671
gi|118496615|ref|NC_008601.1|	RefSeq	gene	1841386	1841940	.	-	.	ID=gene1714;Name=kdpC;Dbxref=GeneID:4548594;gbkey=Gene;gene=kdpC;locus_tag=FTN_1716	1351	478	-0.882019	7.69411	5.86291e-05		-0.882019	0.542607	-0.265514
gi|118496615|ref|NC_008601.1|	RefSeq	gene	1841957	1843996	.	-	.	ID=gene1715;Name=kdpB;Dbxref=GeneID:4548595;gbkey=Gene;gene=kdpB;locus_tag=FTN_1717	9649	4945	-0.347613	10.4924	0.0918143		-0.347613	0.785883	-0.104642
gi|118496615|ref|NC_008601.1|	RefSeq	gene	1844006	1845727	.	-	.	ID=gene1716;Name=kdpA;Dbxref=GeneID:4548596;gbkey=Gene;gene=kdpA;locus_tag=FTN_1718	7102	4069	-0.186757	10.2256	0.366055		-0.186757	0.878578	-0.0562195
gi|118496615|ref|NC_008601.1|	RefSeq	gene	1846030	1847178	.	-	.	ID=gene1717;Name=FTN_1719;Dbxref=GeneID:4548597;gbkey=Gene;locus_tag=FTN_1719	4683	3498	0.195881	9.52498	0.344603		0.195881	1.14542	0.058966
gi|118496615|ref|NC_008601.1|	RefSeq	gene	1847508	1847624	.	-	.	ID=gene1718;Name=FTN_1720;Dbxref=GeneID:4548598;gbkey=Gene;locus_tag=FTN_1720	47	36	0.231437	2.01677	0.642453		0.231437	1.174	0.0696696
gi|118496615|ref|NC_008601.1|	RefSeq	gene	1847673	1850534	.	-	.	ID=gene1719;Name=FTN_1721;Dbxref=GeneID:4548599;gbkey=Gene;locus_tag=FTN_1721	17431	2151	-2.40173	9.4331	1.42482e-28		-2.40173	0.189237	-0.722994
gi|118496615|ref|NC_008601.1|	RefSeq	gene	1850608	1850683	.	+	.	ID=gene1720;Name=FTN_1722;Dbxref=GeneID:4548600;gbkey=Gene;locus_tag=FTN_1722	219	79	-0.853412	6.62013	0.00252054		-0.853412	0.553474	-0.256903
gi|118496615|ref|NC_008601.1|	RefSeq	gene	1850698	1850774	.	+	.	ID=gene1721;Name=FTN_1723;Dbxref=GeneID:4548601;gbkey=Gene;locus_tag=FTN_1723	293	67	-1.5105	6.49774	6.47484e-08		-1.5105	0.35099	-0.454706
gi|118496615|ref|NC_008601.1|	RefSeq	gene	1850870	1852393	.	-	.	ID=gene1722;Name=FTN_1724;Dbxref=GeneID:4548602;gbkey=Gene;locus_tag=FTN_1724	8865	1824	-1.66417	8.62346	4.46888e-15		-1.66417	0.315525	-0.500966
gi|118496615|ref|NC_008601.1|	RefSeq	gene	1852727	1853917	.	-	.	ID=gene1723;Name=aspC;Dbxref=GeneID:4548603;gbkey=Gene;gene=aspC;locus_tag=FTN_1725	1970	1526	0.248331	7.10803	0.239076		0.248331	1.18783	0.0747552
gi|118496615|ref|NC_008601.1|	RefSeq	gene	1853935	1855098	.	-	.	ID=gene1724;Name=FTN_1726;Dbxref=GeneID:4548604;gbkey=Gene;locus_tag=FTN_1726	1501	1453	0.569853	6.94196	0.0071684		0.569853	1.48437	0.171543
gi|118496615|ref|NC_008601.1|	RefSeq	gene	1855152	1855901	.	-	.	ID=gene1725;Name=dapD;Dbxref=GeneID:4548605;gbkey=Gene;gene=dapD;locus_tag=FTN_1727	1974	1748	0.441344	7.20192	0.0359361		0.441344	1.35787	0.132858
gi|118496615|ref|NC_008601.1|	RefSeq	gene	1855925	1856812	.	-	.	ID=gene1726;Name=dapA;Dbxref=GeneID:4548606;gbkey=Gene;gene=dapA;locus_tag=FTN_1728	3917	4352	0.768696	8.35755	0.00021785		0.768696	1.70373	0.231401
gi|118496615|ref|NC_008601.1|	RefSeq	gene	1856803	1857474	.	-	.	ID=gene1727;Name=dapB;Dbxref=GeneID:4548607;gbkey=Gene;gene=dapB;locus_tag=FTN_1729	1710	1680	0.591212	7.08882	0.00509234		0.591212	1.50651	0.177972
gi|118496615|ref|NC_008601.1|	RefSeq	gene	1857486	1858841	.	-	.	ID=gene1728;Name=lysC;Dbxref=GeneID:4548608;gbkey=Gene;gene=lysC;locus_tag=FTN_1730	2116	1718	0.31616	7.32456	0.13267		0.31616	1.24501	0.0951735
gi|118496615|ref|NC_008601.1|	RefSeq	gene	1859253	1860191	.	-	.	ID=gene1729;Name=pip;Dbxref=GeneID:4548668;gbkey=Gene;gene=pip;locus_tag=FTN_1731	2477	1384	-0.222946	7.28959	0.290181		-0.222946	0.856814	-0.0671133
gi|118496615|ref|NC_008601.1|	RefSeq	gene	1860267	1861013	.	-	.	ID=gene1730;Name=FTN_1732;Dbxref=GeneID:4548669;gbkey=Gene;locus_tag=FTN_1732	569	297	-0.321081	5.3487	0.167691		-0.321081	0.80047	-0.0966549
gi|118496615|ref|NC_008601.1|	RefSeq	gene	1861014	1861637	.	-	.	ID=gene1731;Name=FTN_1733;Dbxref=GeneID:4548670;gbkey=Gene;locus_tag=FTN_1733	278	128	-0.501825	4.60215	0.0523926		-0.501825	0.706213	-0.151064
gi|118496615|ref|NC_008601.1|	RefSeq	gene	1861861	1862253	.	+	.	ID=gene1732;Name=FTN_1734;Dbxref=GeneID:4548671;gbkey=Gene;locus_tag=FTN_1734	14482	10433	0.143681	10.0726	0.484073		0.143681	1.10472	0.0432524
gi|118496615|ref|NC_008601.1|	RefSeq	gene	1862274	1862684	.	+	.	ID=gene1733;Name=FTN_1735;Dbxref=GeneID:4548672;gbkey=Gene;locus_tag=FTN_1735	4413	1835	-0.649162	9.00453	0.00189736		-0.649162	0.637651	-0.195417
gi|118496615|ref|NC_008601.1|	RefSeq	gene	1862687	1863085	.	+	.	ID=gene1734;Name=FTN_1736;Dbxref=GeneID:4548673;gbkey=Gene;locus_tag=FTN_1736	2026	965	-0.453204	7.86705	0.0330869		-0.453204	0.730419	-0.136428
gi|118496615|ref|NC_008601.1|	RefSeq	gene	1863156	1864574	.	+	.	ID=gene1735;Name=eriC;Dbxref=GeneID:4548674;gbkey=Gene;gene=eriC;locus_tag=FTN_1737	1866	1206	-0.0129285	7.97137	0.954936		-0.0129285	0.991079	-0.00389186
gi|118496615|ref|NC_008601.1|	RefSeq	gene	1864510	1866015	.	+	.	ID=gene1736;Name=FTN_1738;Dbxref=GeneID:4548675;gbkey=Gene;locus_tag=FTN_1738	5049	2323	-0.503201	8.33104	0.0155839		-0.503201	0.70554	-0.151479
gi|118496615|ref|NC_008601.1|	RefSeq	gene	1866821	1868011	.	+	.	ID=gene1737;Name=trpB;Dbxref=GeneID:4548676;gbkey=Gene;gene=trpB;locus_tag=FTN_1739	10684	6909	-0.0121133	9.58308	0.953669		-0.0121133	0.991639	-0.00364648
gi|118496615|ref|NC_008601.1|	RefSeq	gene	1868014	1868820	.	+	.	ID=gene1738;Name=trpA;Dbxref=GeneID:4548677;gbkey=Gene;gene=trpA;locus_tag=FTN_1740	5043	3470	0.0774407	8.5473	0.709206		0.0774407	1.05514	0.023312
gi|118496615|ref|NC_008601.1|	RefSeq	gene	1868875	1869228	.	-	.	ID=gene1739;Name=FTN_1741;Dbxref=GeneID:4548678;gbkey=Gene;locus_tag=FTN_1741	572	341	-0.129418	5.54345	0.583738		-0.129418	0.9142	-0.0389587
gi|118496615|ref|NC_008601.1|	RefSeq	gene	1869318	1870028	.	-	.	ID=gene1740;Name=pnuC;Dbxref=GeneID:4548679;gbkey=Gene;gene=pnuC;locus_tag=FTN_1742	335	247	0.177064	5.50553	0.471619		0.177064	1.13058	0.0533016
gi|118496615|ref|NC_008601.1|	RefSeq	gene	1870244	1872823	.	+	.	ID=gene1741;Name=clpB;Dbxref=GeneID:4548680;gbkey=Gene;gene=clpB;locus_tag=FTN_1743	52489	59653	0.801367	12.3279	9.83255e-05		0.801367	1.74275	0.241236
gi|118496615|ref|NC_008601.1|	RefSeq	gene	1873074	1875266	.	+	.	ID=gene1742;Name=chiB;Dbxref=GeneID:4548681;gbkey=Gene;gene=chiB;locus_tag=FTN_1744	2108	1555	0.177817	8.5215	0.399127		0.177817	1.13117	0.0535283
gi|118496615|ref|NC_008601.1|	RefSeq	gene	1875320	1876480	.	+	.	ID=gene1743;Name=purT;Dbxref=GeneID:4548682;gbkey=Gene;gene=purT;locus_tag=FTN_1745	1181	614	-0.326862	7.04513	0.133873		-0.326862	0.797269	-0.0983952
gi|118496615|ref|NC_008601.1|	RefSeq	gene	1876485	1877140	.	-	.	ID=gene1744;Name=FTN_1746;Note=frameshift;Dbxref=GeneID:4548683;gbkey=Gene;locus_tag=FTN_1746;pseudo=true	476	210	-0.563563	5.59269	0.0182569		-0.563563	0.676629	-0.16965
gi|118496615|ref|NC_008601.1|	RefSeq	gene	1877218	1877859	.	-	.	ID=gene1745;Name=FTN_1747;Dbxref=GeneID:4548684;gbkey=Gene;locus_tag=FTN_1747	598	273	-0.514299	5.67752	0.0269304		-0.514299	0.700133	-0.154819
gi|118496615|ref|NC_008601.1|	RefSeq	gene	1878089	1878412	.	+	.	ID=gene1746;Name=FTN_1748;Dbxref=GeneID:4548685;gbkey=Gene;locus_tag=FTN_1748	9936	8165	0.333573	9.64411	0.104935		0.333573	1.26013	0.100415
gi|118496615|ref|NC_008601.1|	RefSeq	gene	1878575	1879327	.	+	.	ID=gene1747;Name=FTN_1749;Dbxref=GeneID:4548686;gbkey=Gene;locus_tag=FTN_1749	864	658	0.22381	8.42084	0.307573		0.22381	1.16781	0.0673734
gi|118496615|ref|NC_008601.1|	RefSeq	gene	1879341	1880081	.	+	.	ID=gene1748;Name=FTN_1750;Dbxref=GeneID:4548687;gbkey=Gene;locus_tag=FTN_1750	1220	878	0.142184	8.66364	0.510665		0.142184	1.10357	0.0428018
gi|118496615|ref|NC_008601.1|	RefSeq	gene	1880087	1880806	.	-	.	ID=gene1749;Name=FTN_1751;Dbxref=GeneID:4548688;gbkey=Gene;locus_tag=FTN_1751	470	263	-0.220732	6.97864	0.348738		-0.220732	0.85813	-0.0664468
gi|118496615|ref|NC_008601.1|	RefSeq	gene	1880871	1882022	.	-	.	ID=gene1750;Name=nhaA;Dbxref=GeneID:4548689;gbkey=Gene;gene=nhaA;locus_tag=FTN_1752	785	438	-0.224925	6.88858	0.312439		-0.224925	0.855639	-0.0677093
gi|118496615|ref|NC_008601.1|	RefSeq	gene	1882116	1883012	.	+	.	ID=gene1751;Name=FTN_1753;Dbxref=GeneID:4548690;gbkey=Gene;locus_tag=FTN_1753	2088	1870	0.457678	7.79136	0.0293535		0.457678	1.37333	0.137775
gi|118496615|ref|NC_008601.1|	RefSeq	gene	1883079	1883588	.	+	.	ID=gene1752;Name=FTN_1754;Dbxref=GeneID:4548691;gbkey=Gene;locus_tag=FTN_1754	570	336	-0.14567	5.89535	0.532244		-0.14567	0.903959	-0.0438512
gi|118496615|ref|NC_008601.1|	RefSeq	gene	1883615	1884874	.	+	.	ID=gene1753;Name=FTN_1755;Dbxref=GeneID:4548692;gbkey=Gene;locus_tag=FTN_1755	553	396	0.134975	6.55624	0.555695		0.134975	1.09807	0.0406316
gi|118496615|ref|NC_008601.1|	RefSeq	gene	1885175	1885654	.	+	.	ID=gene1754;Name=bcp;Dbxref=GeneID:4548693;gbkey=Gene;gene=bcp;locus_tag=FTN_1756	3640	1563	-0.6028	7.78861	0.00403735		-0.6028	0.658475	-0.181461
gi|118496615|ref|NC_008601.1|	RefSeq	gene	1885732	1886715	.	-	.	ID=gene1755;Name=FTN_1757;Dbxref=GeneID:4548694;gbkey=Gene;locus_tag=FTN_1757	805	459	-0.193666	6.93764	0.384273		-0.193666	0.874381	-0.0582993
gi|118496615|ref|NC_008601.1|	RefSeq	gene	1887821	1888441	.	+	.	ID=gene1756;Name=FTN_1758;Dbxref=GeneID:4548695;gbkey=Gene;locus_tag=FTN_1758	197	131	0.0281393	4.97972	0.944934		0.0281393	1.0197	0.00847078
gi|118496615|ref|NC_008601.1|	RefSeq	gene	1888509	1888901	.	-	.	ID=gene1757;Name=FTN_1759;Dbxref=GeneID:4548696;gbkey=Gene;locus_tag=FTN_1759	150	91	-0.104126	4.48011	0.756375		-0.104126	0.930369	-0.0313449
gi|118496615|ref|NC_008601.1|	RefSeq	gene	1889010	1889999	.	+	.	ID=gene1758;Name=FTN_1760;Dbxref=GeneID:4548697;gbkey=Gene;locus_tag=FTN_1760	1131	668	-0.142869	6.5844	0.513698		-0.142869	0.905716	-0.0430079
gi|118496615|ref|NC_008601.1|	RefSeq	gene	1889997	1890802	.	-	.	ID=gene1759;Name=FTN_1761;Note=frameshift;Dbxref=GeneID:4548698;gbkey=Gene;locus_tag=FTN_1761;pseudo=true	910	714	0.266807	6.83088	0.221768		0.266807	1.20314	0.0803168
gi|118496615|ref|NC_008601.1|	RefSeq	gene	1890744	1892423	.	-	.	ID=gene1760;Name=FTN_1762;Dbxref=GeneID:4548699;gbkey=Gene;locus_tag=FTN_1762	3954	2420	-0.0915126	8.81263	0.661141		-0.0915126	0.938538	-0.0275481
gi|118496615|ref|NC_008601.1|	RefSeq	gene	1892635	1893855	.	+	.	ID=gene1761;Name=FTN_1763;Dbxref=GeneID:4548700;gbkey=Gene;locus_tag=FTN_1763	544	358	0.0131389	6.02805	0.965403		0.0131389	1.00915	0.00395519
gi|118496615|ref|NC_008601.1|	RefSeq	gene	1893872	1894084	.	-	.	ID=gene1762;Name=FTN_1764;Dbxref=GeneID:4548701;gbkey=Gene;locus_tag=FTN_1764	166	72	-0.587663	3.72798	0.0432657		-0.587663	0.66542	-0.176904
gi|118496615|ref|NC_008601.1|	RefSeq	gene	1894130	1895101	.	+	.	ID=gene1763;Name=FTN_1765;Dbxref=GeneID:4548702;gbkey=Gene;locus_tag=FTN_1765	809	579	0.134189	6.24296	0.54384		0.134189	1.09748	0.040395
gi|118496615|ref|NC_008601.1|	RefSeq	gene	1895111	1896115	.	-	.	ID=gene1764;Name=FTN_1766;Dbxref=GeneID:4548703;gbkey=Gene;locus_tag=FTN_1766	1385	744	-0.279688	6.84903	0.194871		-0.279688	0.823769	-0.0841945
gi|118496615|ref|NC_008601.1|	RefSeq	gene	1896132	1897052	.	-	.	ID=gene1765;Name=rbsK;Dbxref=GeneID:4548704;gbkey=Gene;gene=rbsK;locus_tag=FTN_1767	7641	5926	0.250082	9.08485	0.224978		0.250082	1.18927	0.0752822
gi|118496615|ref|NC_008601.1|	RefSeq	gene	1897170	1899746	.	-	.	ID=gene1766;Name=pepN;Dbxref=GeneID:4548745;gbkey=Gene;gene=pepN;locus_tag=FTN_1768	2963	1465	-0.399345	8.04511	0.0572433		-0.399345	0.758202	-0.120215
gi|118496615|ref|NC_008601.1|	RefSeq	gene	1899948	1900376	.	+	.	ID=gene1767;Name=FTN_1769;Dbxref=GeneID:4548746;gbkey=Gene;locus_tag=FTN_1769	43687	28060	-0.0218994	11.6389	0.914919		-0.0218994	0.984935	-0.00659237
gi|118496615|ref|NC_008601.1|	RefSeq	gene	1900373	1901734	.	-	.	ID=gene1768;Name=trpC;Dbxref=GeneID:4548747;gbkey=Gene;gene=trpC;gene_synonym=trpC,trpF;locus_tag=FTN_1770	7088	5800	0.327458	9.5546	0.112312		0.327458	1.2548	0.0985746
gi|118496615|ref|NC_008601.1|	RefSeq	gene	1901826	1902239	.	-	.	ID=gene1769;Name=FTN_1771;Dbxref=GeneID:4548748;gbkey=Gene;locus_tag=FTN_1771	715	297	-0.650517	6.33389	0.00447855		-0.650517	0.637052	-0.195825
gi|118496615|ref|NC_008601.1|	RefSeq	gene	1902244	1902933	.	-	.	ID=gene1770;Name=FTN_1772;Dbxref=GeneID:4548749;gbkey=Gene;locus_tag=FTN_1772	3823	1049	-1.24882	7.89313	4.29499e-09		-1.24882	0.420792	-0.375933
gi|118496615|ref|NC_008601.1|	RefSeq	gene	1903017	1903385	.	-	.	ID=gene1771;Name=FTN_1773;Dbxref=GeneID:4548750;gbkey=Gene;locus_tag=FTN_1773	2146	1103	-0.3434	7.4443	0.105118		-0.3434	0.788181	-0.103374
gi|118496615|ref|NC_008601.1|	RefSeq	gene	1903378	1903719	.	-	.	ID=gene1772;Name=FTN_1774;Dbxref=GeneID:4548751;gbkey=Gene;locus_tag=FTN_1774	2165	930	-0.602223	7.45739	0.00464664		-0.602223	0.658738	-0.181287
gi|118496615|ref|NC_008601.1|	RefSeq	gene	1903788	1904228	.	-	.	ID=gene1773;Name=FTN_1775;Dbxref=GeneID:4548752;gbkey=Gene;locus_tag=FTN_1775	531	218	-0.667352	6.28785	0.00465975		-0.667352	0.629661	-0.200893
gi|118496615|ref|NC_008601.1|	RefSeq	gene	1904290	1905303	.	-	.	ID=gene1774;Name=trpD;Dbxref=GeneID:4548753;gbkey=Gene;gene=trpD;locus_tag=FTN_1776	999	493	-0.402037	8.05198	0.0682184		-0.402037	0.756789	-0.121025
gi|118496615|ref|NC_008601.1|	RefSeq	gene	1905300	1905878	.	-	.	ID=gene1775;Name=trpG;Dbxref=GeneID:4548754;gbkey=Gene;gene=trpG;locus_tag=FTN_1777	1138	525	-0.499242	7.66281	0.0229484		-0.499242	0.707478	-0.150287
gi|118496615|ref|NC_008601.1|	RefSeq	gene	1905882	1907426	.	-	.	ID=gene1776;Name=trpE;Dbxref=GeneID:4548755;gbkey=Gene;gene=trpE;locus_tag=FTN_1778	3023	2058	0.0620485	9.07797	0.767974		0.0620485	1.04395	0.0186785
gi|118496615|ref|NC_008601.1|	RefSeq	gene	1907435	1907722	.	-	.	ID=gene1777;Name=trpR;Dbxref=GeneID:4548756;gbkey=Gene;gene=trpR;locus_tag=FTN_1779	557	319	-0.187277	6.36208	0.425791		-0.187277	0.878262	-0.056376
gi|118496615|ref|NC_008601.1|	RefSeq	gene	1907978	1908054	.	+	.	ID=gene1778;Name=FTN_1780;Dbxref=GeneID:4548757;gbkey=Gene;locus_tag=FTN_1780	140	81	-0.172445	8.36425	0.601608		-0.172445	0.887337	-0.0519113
gi|118496615|ref|NC_008601.1|	RefSeq	gene	1908059	1908134	.	+	.	ID=gene1779;Name=FTN_1781;Dbxref=GeneID:4548758;gbkey=Gene;locus_tag=FTN_1781	141	65	-0.499753	7.88148	0.0930283		-0.499753	0.707228	-0.150441
gi|118496615|ref|NC_008601.1|	RefSeq	gene	1908197	1909693	.	-	.	ID=gene1780;Name=rng;Dbxref=GeneID:4548759;gbkey=Gene;gene=rng;locus_tag=FTN_1782	1500	756	-0.371672	6.92197	0.0840249		-0.371672	0.772886	-0.111884
[truncated: 128 more columns]

## Sheet: Sorted by level of Expression
genome?	origin	type	start	end	score	strand	frame	Symbols	Hit_count 798	Hit_count 801	logFC	logCPM	PValue		log2FC	FC	log10FC		ABC Transporters		Alanine, aspartate and glutamate metabolism		alpha-Linolenic acid metabolism		Amino sugar and nucleotide sugar metabolism		Aminoacyl-tRNA biosynthesis		Arachidonic acid metabolism		Arginine and proline metabolism		Arginine biosynthesis		Ascorbate and aldarate metabolism		Bacterial secretion system		Base excision repair		beta-Alanine metabolism		Biosynthesis of unsaturated fatty acids		Biotin metabolism		Butanoate metabolism		C5-Branched dibasic acid metabolism
																	#NUM!		FTN324	0.0650539	FTN19	0.281741	FTN1439	-0.185479	FTN447	0.0384937	FTN129	0.149371	FTN698	-0.0207251	FTN410	0.0449757	FTN171	0.123749	FTN963	-0.0752864	FTN73	0.191907	FTN569	0.00393311	FTN963	-0.0752864	FTN1460	-0.191342	FTN568	0.00395519	FTN127	0.153397	FTN59
gi|118496615|ref|NC_008601.1|	RefSeq	gene	509999	510121	.	+	.	ID=gene499;Name=FTN_0501;Dbxref=GeneID:4547668;gbkey=Gene;locus_tag=FTN_0501	72	171	1.86252	3.43712	8.07142e-11		1.86252	3.63642	0.560675	0.274995	FTN325	0.0646535	FTN20	0.272193			FTN448	0.0380037	FTN147	0.137884			FTN963	-0.0752864	FTN172	0.122967			FTN121	0.157925	FTN603	-0.002548	FTN1353	-0.160799	FTN1564	-0.234938	FTN811	-0.0454701	FTN1041	-0.0905475	FTN60
gi|118496615|ref|NC_008601.1|	RefSeq	gene	181982	182959	.	+	.	ID=gene166;Name=prfB;Dbxref=GeneID:4548767;gbkey=Gene;gene=prfB;locus_tag=FTN_0167	9683	21761	1.78499	10.5186	2.70816e-17		1.78499	3.44617	0.537336	0.290178	FTN326	0.0645725	FTN21	0.26583			FTN462	0.034713	FTN168	0.126553			FTN1131	-0.110112	FTN410	0.0449757			FTN259	0.0857326	FTN673	-0.0153864	FTN1354	-0.161487			FTN812	-0.0463487	FTN1042	-0.0906262	FTN61
gi|118496615|ref|NC_008601.1|	RefSeq	gene	1042429	1043415	.	-	.	ID=gene985;Name=FTN_0987;Dbxref=GeneID:4547412;gbkey=Gene;locus_tag=FTN_0987	3732	7209	1.5666	8.9885	1.05959e-13		1.5666	2.96206	0.471594	0.337603	FTN327	0.064449	FTN127	0.153397			FTN484	0.0250851	FTN214	0.101263			FTN1146	-0.111884	FTN1146	-0.111884			FTN672	-0.0148226	FTN838	-0.051372	FTN1701	-0.34469			FTN813	-0.0465014	FTN1438	-0.185197	FTN593
gi|118496615|ref|NC_008601.1|	RefSeq	gene	700640	702100	.	+	.	ID=gene659;Name=guaB;Dbxref=GeneID:4547884;gbkey=Gene;gene=guaB;locus_tag=FTN_0661	13824	24765	1.45791	11.1379	3.01008e-12		1.45791	2.7471	0.438874	0.364021	FTN328	0.0643525	FTN171	0.123749			FTN485	0.0248246	FTN221	0.0985746			FTN1444	-0.187734	FTN1532	-0.220376			FTN843	-0.0524473	FTN1035	-0.0898772					FTN814	-0.0466437	FTN1636	-0.274086	FTN594
gi|118496615|ref|NC_008601.1|	RefSeq	gene	1675634	1676818	.	-	.	ID=gene1574;Name=tufA;Dbxref=GeneID:4548919;gbkey=Gene;gene=tufA;gene_synonym=tuf;locus_tag=FTN_1576	110321	190888	1.40781	14.4478	1.38199e-11		1.40781	2.65334	0.423792	0.376884	FTN502	0.0207633	FTN172	0.122967			FTN514	0.0174072	FTN224	0.0973718			FTN1467	-0.193147	FTN1725	-0.385706			FTN1094	-0.103374	FTN1350	-0.159346					FTN815	-0.0468256	FTN1637	-0.274156	FTN1041
gi|118496615|ref|NC_008601.1|	RefSeq	gene	1772658	1773089	.	-	.	ID=gene1657;Name=rbfA;Dbxref=GeneID:4548839;gbkey=Gene;gene=rbfA;locus_tag=FTN_1659	2147	3571	1.35073	8.41885	1.58062e-10		1.35073	2.55042	0.406611	0.392093	FTN503	0.0201202	FTN178	0.120515			FTN515	0.0171407	FTN288	0.0754115			FTN1725	-0.385706					FTN1095	-0.103574	FTN1486	-0.202611					FTN816	-0.0468787	FTN1638	-0.274311	FTN1042
gi|118496615|ref|NC_008601.1|	RefSeq	gene	1043405	1044250	.	-	.	ID=gene986;Name=prmA;Dbxref=GeneID:4547413;gbkey=Gene;gene=prmA;locus_tag=FTN_0988	1062	1706	1.3005	7.26694	1.44189e-09		1.3005	2.46314	0.39149	0.405985	FTN572	0.00298207	FTN343	0.0604532			FTN627	-0.00592867	FTN310	0.0703572			FTN1731	-0.40119					FTN1096	-0.103662	FTN1604	-0.253346					FTN818	-0.0474797	FTN1639	-0.274505
gi|118496615|ref|NC_008601.1|	RefSeq	gene	1773092	1775632	.	-	.	ID=gene1658;Name=infB;Dbxref=GeneID:4548840;gbkey=Gene;gene=infB;locus_tag=FTN_1660	28954	44722	1.24401	11.9677	2.07572e-09		1.24401	2.36856	0.374483	0.422198	FTN641	-0.00818189	FTN410	0.0449757			FTN646	-0.00893665	FTN366	0.0537789									FTN1510	-0.212815							FTN1228	-0.129698	FTN1701	-0.34469
gi|118496615|ref|NC_008601.1|	RefSeq	gene	1675539	1675614	.	+	.	ID=gene1573;Name=FTN_1575;Dbxref=GeneID:4548918;gbkey=Gene;locus_tag=FTN_1575	1400	2011	1.13919	9.04969	8.19754e-08		1.13919	2.20257	0.342931	0.454014	FTN642	-0.00819317	FTN485	0.0248246			FTN663	-0.0127026	FTN441	0.0391991									FTN1574	-0.240236							FTN1339	-0.156145
gi|118496615|ref|NC_008601.1|	RefSeq	gene	1251244	1251966	.	-	.	ID=gene1176;Name=FTN_1178;Dbxref=GeneID:4548737;gbkey=Gene;locus_tag=FTN_1178	6801	9625	1.11781	9.45007	7.63802e-08		1.11781	2.17018	0.336495	0.460792	FTN658	-0.0125066	FTN555	0.00768086			FTN685	-0.0176412	FTN468	0.032113									FTN1595	-0.248659							FTN1341	-0.157314
gi|118496615|ref|NC_008601.1|	RefSeq	gene	1164644	1165492	.	-	.	ID=gene1101;Name=FTN_1103;Dbxref=GeneID:4548663;gbkey=Gene;locus_tag=FTN_1103	467	661	1.11777	5.98074	6.07247e-07		1.11777	2.17011	0.336481	0.460807	FTN659	-0.0125671	FTN588	-0.000800818			FTN686	-0.0178287	FTN469	0.0316538									FTN1630	-0.26984							FTN1479	-0.19757
gi|118496615|ref|NC_008601.1|	RefSeq	gene	1165519	1166067	.	-	.	ID=gene1102;Name=FTN_1104;Dbxref=GeneID:4548664;gbkey=Gene;locus_tag=FTN_1104	337	472	1.10248	5.46129	1.70172e-06		1.10248	2.14724	0.33188	0.465715	FTN737	-0.0280619	FTN694	-0.0199623			FTN729	-0.0275473	FTN470	0.0314099									FTN1703	-0.347759
gi|118496615|ref|NC_008601.1|	RefSeq	gene	1676967	1677040	.	+	.	ID=gene1576;Name=FTN_1578;Dbxref=GeneID:4548921;gbkey=Gene;locus_tag=FTN_1578	224	313	1.09893	9.53885	5.53745e-06		1.09893	2.14196	0.330812	0.466861	FTN738	-0.0282119	FTN935	-0.0692658			FTN806	-0.0445581	FTN473	0.0300553
gi|118496615|ref|NC_008601.1|	RefSeq	gene	1593024	1593100	.	-	.	ID=gene1495;Name=FTN_1497;Dbxref=GeneID:4548535;gbkey=Gene;locus_tag=FTN_1497	665	888	1.03383	7.59132	2.39268e-06		1.03383	2.04745	0.311213	0.488413	FTN739	-0.0285343	FTN1080	-0.100207			FTN810	-0.0451884	FTN474	0.0297728
gi|118496615|ref|NC_008601.1|	RefSeq	gene	853311	853387	.	+	.	ID=gene794;Name=FTN_0796;Dbxref=GeneID:4547335;gbkey=Gene;locus_tag=FTN_0796	75	99	1.01586	4.12979	0.000809676		1.01586	2.0221	0.305803	0.494534	FTN902	-0.0644581	FTN1088	-0.102262			FTN1080	-0.100207	FTN519	0.0165758
gi|118496615|ref|NC_008601.1|	RefSeq	gene	779775	779862	.	+	.	ID=gene724;Name=FTN_0726;Dbxref=GeneID:4547855;gbkey=Gene;locus_tag=FTN_0726	41	53	0.984527	3.24212	0.00855414		0.984527	1.97866	0.296372	0.505391	FTN1106	-0.105743	FTN1131	-0.110112			FTN1149	-0.112255	FTN539	0.0108107
gi|118496615|ref|NC_008601.1|	RefSeq	gene	1677042	1677126	.	+	.	ID=gene1577;Name=FTN_1579;Dbxref=GeneID:4548922;gbkey=Gene;locus_tag=FTN_1579	225	290	0.982438	9.26383	5.86934e-05		0.982438	1.9758	0.295743	0.506124	FTN1107	-0.106093	FTN1146	-0.111884			FTN1219	-0.127869	FTN557	0.00713886
gi|118496615|ref|NC_008601.1|	RefSeq	gene	259402	260034	.	+	.	ID=gene238;Name=rplC;Dbxref=GeneID:4548392;gbkey=Gene;gene=rplC;locus_tag=FTN_0239	54010	67382	0.935924	12.674	5.65894e-06		0.935924	1.91312	0.281741	0.522707	FTN1266	-0.139652	FTN1208	-0.124918			FTN1417	-0.179083	FTN614	-0.00455858
gi|118496615|ref|NC_008601.1|	RefSeq	gene	1432438	1432773	.	+	.	ID=gene1352;Name=panD;Dbxref=GeneID:4547911;gbkey=Gene;gene=panD;locus_tag=FTN_1354	1932	2358	0.904206	7.58973	1.74189e-05		0.904206	1.87151	0.272193	0.534327	FTN1267	-0.139671	FTN1383	-0.170103			FTN1418	-0.179968	FTN647	-0.00923667
gi|118496615|ref|NC_008601.1|	RefSeq	gene	737043	737906	.	+	.	ID=gene691;Name=nadC;Dbxref=GeneID:4547309;gbkey=Gene;gene=nadC;locus_tag=FTN_0693	2782	3346	0.883069	9.04565	2.40159e-05		0.883069	1.84429	0.26583	0.542213	FTN1268	-0.139739	FTN1421	-0.181108			FTN1425	-0.181488	FTN650	-0.00990836
gi|118496615|ref|NC_008601.1|	RefSeq	gene	378265	379017	.	+	.	ID=gene375;Name=FTN_0377;Note=IS insertion;Dbxref=GeneID:4548104;gbkey=Gene;locus_tag=FTN_0377;pseudo=true	223	264	0.859844	5.68378	0.000456234		0.859844	1.81484	0.258839	0.551012	FTN1589	-0.246514	FTN1532	-0.220376			FTN1426	-0.181544	FTN726	-0.0273525
gi|118496615|ref|NC_008601.1|	RefSeq	gene	207623	208801	.	-	.	ID=gene189;Name=FTN_0190;Dbxref=GeneID:4547427;gbkey=Gene;locus_tag=FTN_0190	378	446	0.855189	5.97512	0.00019946		0.855189	1.809	0.257437	0.552793	FTN1590	-0.246524	FTN1694	-0.33966			FTN1504	-0.20844	FTN736	-0.0280539
gi|118496615|ref|NC_008601.1|	RefSeq	gene	275553	275780	.	-	.	ID=gene267;Name=FTN_0268;Note=gene fragment;Dbxref=GeneID:4547451;gbkey=Gene;locus_tag=FTN_0268;pseudo=true	1021	1202	0.852148	7.64938	7.33715e-05		0.852148	1.80519	0.256522	0.553959	FTN1591	-0.247868	FTN1700	-0.344399			FTN1632	-0.271971	FTN778	-0.0377014
gi|118496615|ref|NC_008601.1|	RefSeq	gene	1277743	1278606	.	-	.	ID=gene1206;Name=ans;Dbxref=GeneID:4547386;gbkey=Gene;gene=ans;locus_tag=FTN_1208	1494	1751	0.845724	7.98114	6.52176e-05		0.845724	1.79717	0.254588	0.556432	FTN1592	-0.248295	FTN1701	-0.34469			FTN1744	-0.416302	FTN796	-0.042231
gi|118496615|ref|NC_008601.1|	RefSeq	gene	1488584	1488670	.	+	.	ID=gene1409;Name=FTN_1411;Dbxref=GeneID:4547786;gbkey=Gene;locus_tag=FTN_1411	320	374	0.841454	7.49172	0.000319097		0.841454	1.79186	0.253303	0.558081	FTN1593	-0.24849	FTN1725	-0.385706					FTN803	-0.0438512
gi|118496615|ref|NC_008601.1|	RefSeq	gene	739415	740455	.	+	.	ID=gene693;Name=add;Dbxref=GeneID:4547311;gbkey=Gene;gene=add;locus_tag=FTN_0695	1599	1862	0.836413	8.1254	7.60327e-05		0.836413	1.7856	0.251785	0.560034	FTN1606	-0.255506							FTN870	-0.0573438
gi|118496615|ref|NC_008601.1|	RefSeq	gene	702166	702819	.	+	.	ID=gene660;Name=FTN_0662;Dbxref=GeneID:4547885;gbkey=Gene;locus_tag=FTN_0662	1065	1237	0.832692	7.53935	0.000104246		0.832692	1.78101	0.250665	0.561481	FTN1708	-0.352697							FTN882	-0.0604355
gi|118496615|ref|NC_008601.1|	RefSeq	gene	266147	266683	.	+	.	ID=gene253;Name=rplF;Dbxref=GeneID:4547437;gbkey=Gene;gene=rplF;locus_tag=FTN_0254	89620	103891	0.829967	13.1793	5.49907e-05		0.829967	1.77764	0.249845	0.562542									FTN883	-0.0609272
gi|118496615|ref|NC_008601.1|	RefSeq	gene	1082261	1082911	.	-	.	ID=gene1023;Name=ruvA;Dbxref=GeneID:4548307;gbkey=Gene;gene=ruvA;locus_tag=FTN_1025	9733	11256	0.826518	9.72785	6.3251e-05		0.826518	1.7734	0.248807	0.563889									FTN992	-0.0813744
gi|118496615|ref|NC_008601.1|	RefSeq	gene	261847	262125	.	+	.	ID=gene242;Name=rpsS;Dbxref=GeneID:4548396;gbkey=Gene;gene=rpsS;locus_tag=FTN_0243	33681	38748	0.818974	11.8413	6.97095e-05		0.818974	1.76415	0.246536	0.566845									FTN1191	-0.120466
gi|118496615|ref|NC_008601.1|	RefSeq	gene	1231698	1232618	.	-	.	ID=gene1158;Name=FTN_1160;Dbxref=GeneID:4548146;gbkey=Gene;locus_tag=FTN_1160	1441	1650	0.81212	7.98436	0.000127914		0.81212	1.75579	0.244472	0.569544									FTN1203	-0.123611
gi|118496615|ref|NC_008601.1|	RefSeq	gene	267594	267779	.	+	.	ID=gene256;Name=rpmD;Dbxref=GeneID:4547440;gbkey=Gene;gene=rpmD;locus_tag=FTN_0257	41703	47712	0.810988	11.9803	8.14852e-05		0.810988	1.75441	0.244132	0.569991									FTN1204	-0.123871
gi|118496615|ref|NC_008601.1|	RefSeq	gene	1431659	1432444	.	+	.	ID=gene1351;Name=panC;Dbxref=GeneID:4547910;gbkey=Gene;gene=panC;locus_tag=FTN_1353	4156	4750	0.809499	8.60105	9.83129e-05		0.809499	1.7526	0.243683	0.57058									FTN1205	-0.124068
gi|118496615|ref|NC_008601.1|	RefSeq	gene	261008	261832	.	+	.	ID=gene241;Name=rplB;Dbxref=GeneID:4548395;gbkey=Gene;gene=rplB;locus_tag=FTN_0242	67009	76183	0.801902	12.9314	9.69948e-05		0.801902	1.7434	0.241397	0.573592									FTN1206	-0.124111
gi|118496615|ref|NC_008601.1|	RefSeq	gene	1870244	1872823	.	+	.	ID=gene1741;Name=clpB;Dbxref=GeneID:4548680;gbkey=Gene;gene=clpB;locus_tag=FTN_1743	52489	59653	0.801367	12.3279	9.83255e-05		0.801367	1.74275	0.241236	0.573805									FTN1207	-0.124685
gi|118496615|ref|NC_008601.1|	RefSeq	gene	1200802	1201332	.	-	.	ID=gene1134;Name=aroK;Dbxref=GeneID:4548714;gbkey=Gene;gene=aroK;locus_tag=FTN_1136	5382	6080	0.792701	9.59914	0.000131323		0.792701	1.73232	0.238627	0.577262									FTN1306	-0.14976
gi|118496615|ref|NC_008601.1|	RefSeq	gene	1000693	1000887	.	-	.	ID=gene938;Name=FTN_0940;Dbxref=GeneID:4547537;gbkey=Gene;locus_tag=FTN_0940	1300	1465	0.789108	7.45108	0.00020751		0.789108	1.72801	0.237545	0.578702									FTN1307	-0.149857
gi|118496615|ref|NC_008601.1|	RefSeq	gene	374491	374709	.	+	.	ID=gene371;Name=FTN_0372;Dbxref=GeneID:4548100;gbkey=Gene;locus_tag=FTN_0372	127	143	0.787253	4.4842	0.00401481		0.787253	1.72579	0.236987	0.579446									FTN1364	-0.165965
gi|118496615|ref|NC_008601.1|	RefSeq	gene	1855925	1856812	.	-	.	ID=gene1726;Name=dapA;Dbxref=GeneID:4548606;gbkey=Gene;gene=dapA;locus_tag=FTN_1728	3917	4352	0.768696	8.35755	0.00021785		0.768696	1.70373	0.231401	0.586948									FTN1365	-0.166041
gi|118496615|ref|NC_008601.1|	RefSeq	gene	267087	267587	.	+	.	ID=gene255;Name=rpsE;Dbxref=GeneID:4547439;gbkey=Gene;gene=rpsE;locus_tag=FTN_0256	80918	89803	0.767091	12.9976	0.000190604		0.767091	1.70184	0.230918	0.587601									FTN1366	-0.166135
gi|118496615|ref|NC_008601.1|	RefSeq	gene	360958	362277	.	+	.	ID=gene357;Name=rimO;Dbxref=GeneID:4548339;gbkey=Gene;gene=rimO;locus_tag=FTN_0358	8766	9676	0.759271	9.84422	0.000236798		0.759271	1.69264	0.228563	0.590795									FTN1375	-0.168308
gi|118496615|ref|NC_008601.1|	RefSeq	gene	1480069	1480959	.	-	.	ID=gene1400;Name=ppnK;Dbxref=GeneID:4547850;gbkey=Gene;gene=ppnK;locus_tag=FTN_1402	813	895	0.755312	6.86215	0.000508577		0.755312	1.688	0.227372	0.592418									FTN1377	-0.168866
gi|118496615|ref|NC_008601.1|	RefSeq	gene	1482098	1482877	.	-	.	ID=gene1402;Name=FTN_1404;Dbxref=GeneID:4547852;gbkey=Gene;locus_tag=FTN_1404	923	1004	0.738052	7.46951	0.000633813		0.738052	1.66792	0.222176	0.599549									FTN1411	-0.177354
gi|118496615|ref|NC_008601.1|	RefSeq	gene	1432777	1433547	.	+	.	ID=gene1353;Name=FTN_1355;Dbxref=GeneID:4547912;gbkey=Gene;locus_tag=FTN_1355	2830	3078	0.73795	8.23783	0.000408734		0.73795	1.6678	0.222145	0.599591									FTN1473	-0.195417
gi|118496615|ref|NC_008601.1|	RefSeq	gene	1592378	1592992	.	+	.	ID=gene1494;Name=coaE;Dbxref=GeneID:4548534;gbkey=Gene;gene=coaE;locus_tag=FTN_1496	4436	4809	0.733248	8.88585	0.000411193		0.733248	1.66238	0.220729	0.601548									FTN1497	-0.206587
[truncated: 1,736 more rows]
[truncated: 128 more columns]
